# Supplementary material for: Prediction of Cross-Recognition of Peptide-HLA A2 by Melan-A-Specific Cytotoxic T Lymphocytes Using Three-Dimensional Quantitative Structure-Activity Relationships
Source: PLoS One. 2013 Jul 16;8(7):e65590. doi: 10.1371/journal.pone.0065590 (PMC3713012; doi:10.1371/journal.pone.0065590)
Supplement: Appendix S1 — HLA-A2-1jf1.pdb. 3D structure of the HLA-A2 molecule used for the docking. It corresponds to the 1JF1 entry of the PDB. (PDB) [file pone.0065590.s001.pdb]

ATOM      1  N   GLY     1      13.088  54.982  48.725  1.00 39.78      1SG 
ATOM      2  HT1 GLY     1      12.843  55.331  47.776  1.00   .00      1SG 
ATOM      3  HT2 GLY     1      14.006  54.494  48.688  1.00   .00      1SG 
ATOM      4  HT3 GLY     1      13.149  55.784  49.384  1.00   .00      1SG 
ATOM      5  CA  GLY     1      12.047  54.040  49.189  1.00 39.27      1SG 
ATOM      6  HA1 GLY     1      11.996  53.214  48.495  1.00   .00      1SG 
ATOM      7  HA2 GLY     1      11.102  54.561  49.224  1.00   .00      1SG 
ATOM      8  C   GLY     1      12.417  53.536  50.575  1.00 38.47      1SG 
ATOM      9  O   GLY     1      13.351  54.044  51.203  1.00 37.65      1SG 
ATOM     10  N   SER     2      11.682  52.543  51.055  1.00 33.11      1SG 
ATOM     11  HN  SER     2      10.926  52.145  50.542  1.00   .00      1SG 
ATOM     12  CA  SER     2      11.940  51.971  52.373  1.00 29.78      1SG 
ATOM     13  HA  SER     2      12.189  52.774  53.051  1.00   .00      1SG 
ATOM     14  CB  SER     2      10.704  51.237  52.844  1.00 30.45      1SG 
ATOM     15  HB1 SER     2      10.958  50.586  53.708  1.00   .00      1SG 
ATOM     16  HB2 SER     2      10.298  50.614  52.018  1.00   .00      1SG 
ATOM     17  OG  SER     2       9.718  52.166  53.245  1.00 41.56      1SG 
ATOM     18  HG1 SER     2       9.869  52.326  54.179  1.00   .00      1SG 
ATOM     19  C   SER     2      13.121  51.002  52.302  1.00 24.75      1SG 
ATOM     20  O   SER     2      13.498  50.577  51.218  1.00 24.67      1SG 
ATOM     21  N   HSE     3      13.699  50.675  53.454  1.00 19.90      1SG 
ATOM     22  HN  HSE     3      13.392  51.049  54.325  1.00   .00      1SG 
ATOM     23  CA  HSE     3      14.818  49.749  53.516  1.00 19.61      1SG 
ATOM     24  HA  HSE     3      14.763  49.099  52.655  1.00   .00      1SG 
ATOM     25  CB  HSE     3      16.137  50.507  53.524  1.00 18.97      1SG 
ATOM     26  HB1 HSE     3      16.963  49.788  53.706  1.00   .00      1SG 
ATOM     27  HB2 HSE     3      16.117  51.254  54.345  1.00   .00      1SG 
ATOM     28  ND1 HSE     3      16.803  50.563  51.096  1.00 21.41      1SG 
ATOM     29  CG  HSE     3      16.409  51.223  52.242  1.00 22.40      1SG 
ATOM     30  CE1 HSE     3      16.909  51.435  50.106  1.00 27.44      1SG 
ATOM     31  HE1 HSE     3      17.203  51.228  49.078  1.00   .00      1SG 
ATOM     32  NE2 HSE     3      16.594  52.633  50.569  1.00 25.09      1SG 
ATOM     33  HE2 HSE     3      16.582  53.485  50.046  1.00   .00      1SG 
ATOM     34  CD2 HSE     3      16.280  52.528  51.905  1.00 25.85      1SG 
ATOM     35  HD2 HSE     3      15.990  53.372  52.519  1.00   .00      1SG 
ATOM     36  C   HSE     3      14.706  48.906  54.781  1.00 19.09      1SG 
ATOM     37  O   HSE     3      14.025  49.292  55.743  1.00 20.19      1SG 
ATOM     38  N   SER     4      15.376  47.754  54.778  1.00 18.17      1SG 
ATOM     39  HN  SER     4      15.924  47.445  54.004  1.00   .00      1SG 
ATOM     40  CA  SER     4      15.326  46.881  55.946  1.00 17.25      1SG 
ATOM     41  HA  SER     4      15.087  47.484  56.809  1.00   .00      1SG 
ATOM     42  CB  SER     4      14.265  45.795  55.739  1.00 22.21      1SG 
ATOM     43  HB1 SER     4      13.286  46.268  55.513  1.00   .00      1SG 
ATOM     44  HB2 SER     4      14.175  45.180  56.660  1.00   .00      1SG 
ATOM     45  OG  SER     4      14.626  44.938  54.647  1.00 26.98      1SG 
ATOM     46  HG1 SER     4      14.686  45.505  53.874  1.00   .00      1SG 
ATOM     47  C   SER     4      16.665  46.207  56.183  1.00 18.70      1SG 
ATOM     48  O   SER     4      17.489  46.101  55.277  1.00 15.45      1SG 
ATOM     49  N   MET     5      16.880  45.787  57.425  1.00 15.30      1SG 
ATOM     50  HN  MET     5      16.236  45.958  58.167  1.00   .00      1SG 
ATOM     51  CA  MET     5      18.074  45.051  57.767  1.00 17.83      1SG 
ATOM     52  HA  MET     5      18.577  44.800  56.845  1.00   .00      1SG 
ATOM     53  CB  MET     5      19.009  45.843  58.666  1.00 13.20      1SG 
ATOM     54  HB1 MET     5      18.464  46.154  59.583  1.00   .00      1SG 
ATOM     55  HB2 MET     5      19.355  46.752  58.129  1.00   .00      1SG 
ATOM     56  CG  MET     5      20.223  44.990  59.059  1.00 20.30      1SG 
ATOM     57  HG1 MET     5      20.513  44.405  58.163  1.00   .00      1SG 
ATOM     58  HG2 MET     5      19.885  44.285  59.846  1.00   .00      1SG 
ATOM     59  SD  MET     5      21.679  45.838  59.663  1.00 27.30      1SG 
ATOM     60  CE  MET     5      21.152  46.319  61.313  1.00 29.03      1SG 
ATOM     61  HE1 MET     5      20.889  45.432  61.927  1.00   .00      1SG 
ATOM     62  HE2 MET     5      20.256  46.974  61.254  1.00   .00      1SG 
ATOM     63  HE3 MET     5      21.968  46.866  61.832  1.00   .00      1SG 
ATOM     64  C   MET     5      17.547  43.834  58.512  1.00 17.93      1SG 
ATOM     65  O   MET     5      16.718  43.957  59.433  1.00 15.97      1SG 
ATOM     66  N   ARG     6      18.021  42.654  58.126  1.00 14.58      1SG 
ATOM     67  HN  ARG     6      18.710  42.539  57.415  1.00   .00      1SG 
ATOM     68  CA  ARG     6      17.511  41.460  58.773  1.00 13.68      1SG 
ATOM     69  HA  ARG     6      17.053  41.751  59.707  1.00   .00      1SG 
ATOM     70  CB  ARG     6      16.492  40.777  57.869  1.00 14.21      1SG 
ATOM     71  HB1 ARG     6      16.194  39.821  58.348  1.00   .00      1SG 
ATOM     72  HB2 ARG     6      16.986  40.556  56.899  1.00   .00      1SG 
ATOM     73  CG  ARG     6      15.238  41.570  57.586  1.00 20.91      1SG 
ATOM     74  HG1 ARG     6      14.881  41.339  56.560  1.00   .00      1SG 
ATOM     75  HG2 ARG     6      15.466  42.655  57.651  1.00   .00      1SG 
ATOM     76  CD  ARG     6      14.152  41.225  58.585  1.00 29.31      1SG 
ATOM     77  HD1 ARG     6      14.362  41.704  59.565  1.00   .00      1SG 
ATOM     78  HD2 ARG     6      14.076  40.124  58.707  1.00   .00      1SG 
ATOM     79  NE  ARG     6      12.874  41.723  58.094  1.00 31.40      1SG 
ATOM     80  HE  ARG     6      12.206  41.059  57.761  1.00   .00      1SG 
ATOM     81  CZ  ARG     6      12.547  43.010  58.064  1.00 30.05      1SG 
ATOM     82  NH1 ARG     6      13.408  43.927  58.515  1.00 23.13      1SG 
ATOM     83 HH11 ARG     6      14.348  43.665  58.734  1.00   .00      1SG 
ATOM     84 HH12 ARG     6      13.112  44.875  58.634  1.00   .00      1SG 
ATOM     85  NH2 ARG     6      11.361  43.383  57.590  1.00 32.36      1SG 
ATOM     86 HH21 ARG     6      10.717  42.695  57.257  1.00   .00      1SG 
ATOM     87 HH22 ARG     6      11.114  44.352  57.567  1.00   .00      1SG 
ATOM     88  C   ARG     6      18.605  40.457  59.036  1.00 15.51      1SG 
ATOM     89  O   ARG     6      19.483  40.232  58.176  1.00 15.90      1SG 
ATOM     90  N   TYR     7      18.529  39.822  60.193  1.00 13.03      1SG 
ATOM     91  HN  TYR     7      17.839  40.032  60.882  1.00   .00      1SG 
ATOM     92  CA  TYR     7      19.476  38.765  60.510  1.00 11.36      1SG 
ATOM     93  HA  TYR     7      20.176  38.691  59.691  1.00   .00      1SG 
ATOM     94  CB  TYR     7      20.216  39.054  61.807  1.00 11.43      1SG 
ATOM     95  HB1 TYR     7      20.682  38.121  62.190  1.00   .00      1SG 
ATOM     96  HB2 TYR     7      19.510  39.465  62.560  1.00   .00      1SG 
ATOM     97  CG  TYR     7      21.312  40.067  61.602  1.00 15.19      1SG 
ATOM     98  CD1 TYR     7      22.508  39.697  60.978  1.00 18.25      1SG 
ATOM     99  HD1 TYR     7      22.622  38.691  60.603  1.00   .00      1SG 
ATOM    100  CE1 TYR     7      23.575  40.624  60.829  1.00 18.92      1SG 
ATOM    101  HE1 TYR     7      24.499  40.328  60.355  1.00   .00      1SG 
ATOM    102  CZ  TYR     7      23.406  41.926  61.308  1.00 20.52      1SG 
ATOM    103  OH  TYR     7      24.448  42.837  61.196  1.00 18.44      1SG 
ATOM    104  HH  TYR     7      25.232  42.358  60.919  1.00   .00      1SG 
ATOM    105  CD2 TYR     7      21.169  41.378  62.059  1.00 17.73      1SG 
ATOM    106  HD2 TYR     7      20.244  41.679  62.529  1.00   .00      1SG 
ATOM    107  CE2 TYR     7      22.201  42.306  61.919  1.00 16.66      1SG 
ATOM    108  HE2 TYR     7      22.073  43.316  62.280  1.00   .00      1SG 
ATOM    109  C   TYR     7      18.647  37.489  60.647  1.00 15.66      1SG 
ATOM    110  O   TYR     7      17.596  37.508  61.296  1.00 14.49      1SG 
ATOM    111  N   PHE     8      19.114  36.410  60.008  1.00 12.33      1SG 
ATOM    112  HN  PHE     8      19.967  36.440  59.493  1.00   .00      1SG 
ATOM    113  CA  PHE     8      18.421  35.108  60.010  1.00 12.46      1SG 
ATOM    114  HA  PHE     8      17.512  35.211  60.584  1.00   .00      1SG 
ATOM    115  CB  PHE     8      18.102  34.680  58.575  1.00 11.25      1SG 
ATOM    116  HB1 PHE     8      17.576  33.702  58.594  1.00   .00      1SG 
ATOM    117  HB2 PHE     8      19.049  34.594  58.001  1.00   .00      1SG 
ATOM    118  CG  PHE     8      17.222  35.640  57.834  1.00 15.33      1SG 
ATOM    119  CD1 PHE     8      15.837  35.505  57.880  1.00 17.82      1SG 
ATOM    120  HD1 PHE     8      15.401  34.689  58.437  1.00   .00      1SG 
ATOM    121  CE1 PHE     8      14.994  36.415  57.212  1.00 22.32      1SG 
ATOM    122  HE1 PHE     8      13.922  36.291  57.257  1.00   .00      1SG 
ATOM    123  CZ  PHE     8      15.540  37.468  56.498  1.00 19.44      1SG 
ATOM    124  HZ  PHE     8      14.896  38.170  55.989  1.00   .00      1SG 
ATOM    125  CD2 PHE     8      17.773  36.697  57.109  1.00 21.52      1SG 
ATOM    126  HD2 PHE     8      18.846  36.811  57.061  1.00   .00      1SG 
ATOM    127  CE2 PHE     8      16.942  37.619  56.438  1.00 22.59      1SG 
ATOM    128  HE2 PHE     8      17.377  38.436  55.881  1.00   .00      1SG 
ATOM    129  C   PHE     8      19.382  34.092  60.598  1.00 13.91      1SG 
ATOM    130  O   PHE     8      20.526  33.988  60.156  1.00 15.10      1SG 
ATOM    131  N   PHE     9      18.903  33.305  61.550  1.00 11.81      1SG 
ATOM    132  HN  PHE     9      17.950  33.340  61.842  1.00   .00      1SG 
ATOM    133  CA  PHE     9      19.754  32.332  62.231  1.00 11.18      1SG 
ATOM    134  HA  PHE     9      20.727  32.345  61.764  1.00   .00      1SG 
ATOM    135  CB  PHE     9      19.862  32.702  63.711  1.00 10.38      1SG 
ATOM    136  HB1 PHE     9      20.591  32.025  64.206  1.00   .00      1SG 
ATOM    137  HB2 PHE     9      18.864  32.603  64.188  1.00   .00      1SG 
ATOM    138  CG  PHE     9      20.333  34.117  63.945  1.00 12.44      1SG 
ATOM    139  CD1 PHE     9      21.682  34.388  64.055  1.00 14.08      1SG 
ATOM    140  HD1 PHE     9      22.391  33.575  64.000  1.00   .00      1SG 
ATOM    141  CE1 PHE     9      22.149  35.693  64.236  1.00 16.92      1SG 
ATOM    142  HE1 PHE     9      23.209  35.881  64.323  1.00   .00      1SG 
ATOM    143  CZ  PHE     9      21.248  36.746  64.304  1.00 11.54      1SG 
ATOM    144  HZ  PHE     9      21.605  37.756  64.443  1.00   .00      1SG 
ATOM    145  CD2 PHE     9      19.422  35.168  64.014  1.00 15.06      1SG 
ATOM    146  HD2 PHE     9      18.364  34.966  63.931  1.00   .00      1SG 
ATOM    147  CE2 PHE     9      19.869  36.495  64.192  1.00 14.15      1SG 
ATOM    148  HE2 PHE     9      19.160  37.308  64.242  1.00   .00      1SG 
ATOM    149  C   PHE     9      19.051  30.977  62.166  1.00 14.42      1SG 
ATOM    150  O   PHE     9      17.865  30.887  62.476  1.00 12.04      1SG 
ATOM    151  N   THR    10      19.791  29.933  61.825  1.00 11.14      1SG 
ATOM    152  HN  THR    10      20.760  30.004  61.602  1.00   .00      1SG 
ATOM    153  CA  THR    10      19.196  28.609  61.763  1.00 12.25      1SG 
ATOM    154  HA  THR    10      18.192  28.680  62.155  1.00   .00      1SG 
ATOM    155  CB  THR    10      19.163  28.067  60.324  1.00 15.04      1SG 
ATOM    156  HB  THR    10      20.193  28.040  59.908  1.00   .00      1SG 
ATOM    157  OG1 THR    10      18.352  28.914  59.501  1.00 15.37      1SG 
ATOM    158  HG1 THR    10      18.903  29.665  59.270  1.00   .00      1SG 
ATOM    159  CG2 THR    10      18.587  26.636  60.308  1.00 10.64      1SG 
ATOM    160 HG21 THR    10      17.632  26.602  60.875  1.00   .00      1SG 
ATOM    161 HG22 THR    10      19.306  25.934  60.782  1.00   .00      1SG 
ATOM    162 HG23 THR    10      18.390  26.320  59.262  1.00   .00      1SG 
ATOM    163  C   THR    10      20.098  27.699  62.574  1.00 11.49      1SG 
ATOM    164  O   THR    10      21.330  27.705  62.377  1.00 11.09      1SG 
ATOM    165  N   SER    11      19.494  26.911  63.461  1.00  9.75      1SG 
ATOM    166  HN  SER    11      18.507  26.930  63.603  1.00   .00      1SG 
ATOM    167  CA  SER    11      20.253  25.956  64.293  1.00  9.71      1SG 
ATOM    168  HA  SER    11      21.279  25.962  63.955  1.00   .00      1SG 
ATOM    169  CB  SER    11      20.180  26.343  65.779  1.00 23.49      1SG 
ATOM    170  HB1 SER    11      20.324  25.443  66.415  1.00   .00      1SG 
ATOM    171  HB2 SER    11      19.194  26.802  66.005  1.00   .00      1SG 
ATOM    172  OG  SER    11      21.205  27.280  66.060  1.00 34.68      1SG 
ATOM    173  HG1 SER    11      22.010  26.768  66.165  1.00   .00      1SG 
ATOM    174  C   SER    11      19.585  24.602  64.103  1.00 13.63      1SG 
ATOM    175  O   SER    11      18.365  24.503  64.208  1.00 12.95      1SG 
ATOM    176  N   VAL    12      20.368  23.564  63.837  1.00 10.58      1SG 
ATOM    177  HN  VAL    12      21.363  23.619  63.816  1.00   .00      1SG 
ATOM    178  CA  VAL    12      19.757  22.254  63.556  1.00 10.16      1SG 
ATOM    179  HA  VAL    12      18.710  22.311  63.816  1.00   .00      1SG 
ATOM    180  CB  VAL    12      19.921  21.878  62.052  1.00 13.66      1SG 
ATOM    181  HB  VAL    12      21.001  21.805  61.804  1.00   .00      1SG 
ATOM    182  CG1 VAL    12      19.242  20.538  61.769  1.00 14.34      1SG 
ATOM    183 HG11 VAL    12      18.207  20.542  62.172  1.00   .00      1SG 
ATOM    184 HG12 VAL    12      19.809  19.716  62.256  1.00   .00      1SG 
ATOM    185 HG13 VAL    12      19.195  20.362  60.673  1.00   .00      1SG 
ATOM    186  CG2 VAL    12      19.338  22.986  61.146  1.00 13.57      1SG 
ATOM    187 HG21 VAL    12      19.866  23.946  61.330  1.00   .00      1SG 
ATOM    188 HG22 VAL    12      18.258  23.126  61.367  1.00   .00      1SG 
ATOM    189 HG23 VAL    12      19.468  22.709  60.078  1.00   .00      1SG 
ATOM    190  C   VAL    12      20.490  21.198  64.365  1.00 13.39      1SG 
ATOM    191  O   VAL    12      21.708  21.067  64.244  1.00 12.84      1SG 
ATOM    192  N   SER    13      19.764  20.424  65.175  1.00 13.12      1SG 
ATOM    193  HN  SER    13      18.775  20.500  65.278  1.00   .00      1SG 
ATOM    194  CA  SER    13      20.457  19.403  65.960  1.00 13.82      1SG 
ATOM    195  HA  SER    13      21.368  19.840  66.342  1.00   .00      1SG 
ATOM    196  CB  SER    13      19.577  18.902  67.124  1.00 15.39      1SG 
ATOM    197  HB1 SER    13      19.398  19.731  67.842  1.00   .00      1SG 
ATOM    198  HB2 SER    13      20.087  18.065  67.646  1.00   .00      1SG 
ATOM    199  OG  SER    13      18.319  18.439  66.632  1.00 14.43      1SG 
ATOM    200  HG1 SER    13      17.826  18.145  67.401  1.00   .00      1SG 
ATOM    201  C   SER    13      20.838  18.250  65.041  1.00 12.66      1SG 
ATOM    202  O   SER    13      20.208  18.003  63.995  1.00 13.21      1SG 
ATOM    203  N   ARG    14      21.880  17.535  65.440  1.00 14.24      1SG 
ATOM    204  HN  ARG    14      22.371  17.735  66.284  1.00   .00      1SG 
ATOM    205  CA  ARG    14      22.365  16.419  64.669  1.00 14.72      1SG 
ATOM    206  HA  ARG    14      21.620  16.162  63.931  1.00   .00      1SG 
ATOM    207  CB  ARG    14      23.702  16.827  63.984  1.00 15.99      1SG 
ATOM    208  HB1 ARG    14      24.146  15.942  63.481  1.00   .00      1SG 
ATOM    209  HB2 ARG    14      24.414  17.198  64.752  1.00   .00      1SG 
ATOM    210  CG  ARG    14      23.443  17.938  62.941  1.00 19.12      1SG 
ATOM    211  HG1 ARG    14      23.138  18.859  63.482  1.00   .00      1SG 
ATOM    212  HG2 ARG    14      22.608  17.612  62.285  1.00   .00      1SG 
ATOM    213  CD  ARG    14      24.659  18.282  62.044  1.00 26.90      1SG 
ATOM    214  HD1 ARG    14      24.306  18.785  61.119  1.00   .00      1SG 
ATOM    215  HD2 ARG    14      25.206  17.350  61.787  1.00   .00      1SG 
ATOM    216  NE  ARG    14      25.605  19.179  62.698  1.00 26.10      1SG 
ATOM    217  HE  ARG    14      25.536  19.297  63.688  1.00   .00      1SG 
ATOM    218  CZ  ARG    14      26.558  19.852  62.048  1.00 26.57      1SG 
ATOM    219  NH1 ARG    14      26.677  19.722  60.740  1.00 24.99      1SG 
ATOM    220 HH11 ARG    14      26.055  19.121  60.239  1.00   .00      1SG 
ATOM    221 HH12 ARG    14      27.390  20.225  60.250  1.00   .00      1SG 
ATOM    222  NH2 ARG    14      27.371  20.671  62.706  1.00 24.93      1SG 
ATOM    223 HH21 ARG    14      27.272  20.787  63.694  1.00   .00      1SG 
ATOM    224 HH22 ARG    14      28.082  21.172  62.213  1.00   .00      1SG 
ATOM    225  C   ARG    14      22.537  15.264  65.646  1.00 20.02      1SG 
ATOM    226  O   ARG    14      23.631  15.004  66.141  1.00 22.22      1SG 
ATOM    227  N   PRO    15      21.432  14.555  65.940  1.00 23.08      1SG 
ATOM    228  CD  PRO    15      20.086  14.810  65.390  1.00 29.75      1SG 
ATOM    229  HD1 PRO    15      20.009  14.412  64.357  1.00   .00      1SG 
ATOM    230  HD2 PRO    15      19.866  15.898  65.396  1.00   .00      1SG 
ATOM    231  CA  PRO    15      21.409  13.412  66.866  1.00 27.74      1SG 
ATOM    232  HA  PRO    15      21.624  13.739  67.871  1.00   .00      1SG 
ATOM    233  CB  PRO    15      20.015  12.824  66.673  1.00 28.35      1SG 
ATOM    234  HB1 PRO    15      19.662  12.312  67.593  1.00   .00      1SG 
ATOM    235  HB2 PRO    15      19.995  12.101  65.830  1.00   .00      1SG 
ATOM    236  CG  PRO    15      19.185  14.037  66.371  1.00 34.50      1SG 
ATOM    237  HG1 PRO    15      18.218  13.760  65.901  1.00   .00      1SG 
ATOM    238  HG2 PRO    15      18.983  14.629  67.289  1.00   .00      1SG 
ATOM    239  C   PRO    15      22.487  12.404  66.513  1.00 24.24      1SG 
ATOM    240  O   PRO    15      22.583  11.969  65.361  1.00 26.21      1SG 
ATOM    241  N   GLY    16      23.271  12.055  67.524  1.00 28.79      1SG 
ATOM    242  HN  GLY    16      23.150  12.433  68.438  1.00   .00      1SG 
ATOM    243  CA  GLY    16      24.357  11.100  67.371  1.00 31.45      1SG 
ATOM    244  HA1 GLY    16      23.934  10.197  66.957  1.00   .00      1SG 
ATOM    245  HA2 GLY    16      24.755  10.907  68.356  1.00   .00      1SG 
ATOM    246  C   GLY    16      25.492  11.551  66.476  1.00 32.22      1SG 
ATOM    247  O   GLY    16      26.399  10.754  66.174  1.00 28.71      1SG 
ATOM    248  N   ARG    17      25.458  12.813  66.043  1.00 22.75      1SG 
ATOM    249  HN  ARG    17      24.738  13.451  66.303  1.00   .00      1SG 
ATOM    250  CA  ARG    17      26.493  13.323  65.153  1.00 25.98      1SG 
ATOM    251  HA  ARG    17      27.285  12.590  65.107  1.00   .00      1SG 
ATOM    252  CB  ARG    17      25.928  13.583  63.751  1.00 27.91      1SG 
ATOM    253  HB1 ARG    17      26.699  14.107  63.148  1.00   .00      1SG 
ATOM    254  HB2 ARG    17      25.036  14.238  63.842  1.00   .00      1SG 
ATOM    255  CG  ARG    17      25.521  12.297  63.019  1.00 39.55      1SG 
ATOM    256  HG1 ARG    17      24.938  11.657  63.714  1.00   .00      1SG 
ATOM    257  HG2 ARG    17      26.439  11.752  62.712  1.00   .00      1SG 
ATOM    258  CD  ARG    17      24.679  12.577  61.784  1.00 45.59      1SG 
ATOM    259  HD1 ARG    17      23.737  13.084  62.083  1.00   .00      1SG 
ATOM    260  HD2 ARG    17      24.450  11.621  61.266  1.00   .00      1SG 
ATOM    261  NE  ARG    17      25.362  13.445  60.827  1.00 51.68      1SG 
ATOM    262  HE  ARG    17      26.308  13.227  60.588  1.00   .00      1SG 
ATOM    263  CZ  ARG    17      24.801  14.509  60.254  1.00 54.65      1SG 
ATOM    264  NH1 ARG    17      23.546  14.833  60.546  1.00 57.61      1SG 
ATOM    265 HH11 ARG    17      23.074  14.375  61.299  1.00   .00      1SG 
ATOM    266 HH12 ARG    17      23.074  15.534  60.012  1.00   .00      1SG 
ATOM    267  NH2 ARG    17      25.495  15.260  59.402  1.00 56.68      1SG 
ATOM    268 HH21 ARG    17      25.031  15.963  58.863  1.00   .00      1SG 
ATOM    269 HH22 ARG    17      26.480  15.121  59.301  1.00   .00      1SG 
ATOM    270  C   ARG    17      27.121  14.594  65.720  1.00 20.09      1SG 
ATOM    271  O   ARG    17      27.652  15.413  64.992  1.00 24.60      1SG 
ATOM    272  N   GLY    18      27.045  14.733  67.029  1.00 17.42      1SG 
ATOM    273  HN  GLY    18      26.568  14.084  67.616  1.00   .00      1SG 
ATOM    274  CA  GLY    18      27.671  15.868  67.678  1.00 18.44      1SG 
ATOM    275  HA1 GLY    18      28.589  16.044  67.139  1.00   .00      1SG 
ATOM    276  HA2 GLY    18      27.884  15.548  68.686  1.00   .00      1SG 
ATOM    277  C   GLY    18      26.956  17.196  67.778  1.00 19.19      1SG 
ATOM    278  O   GLY    18      25.755  17.261  68.039  1.00 19.61      1SG 
ATOM    279  N   GLU    19      27.728  18.256  67.582  1.00 13.77      1SG 
ATOM    280  HN  GLU    19      28.682  18.167  67.307  1.00   .00      1SG 
ATOM    281  CA  GLU    19      27.246  19.611  67.751  1.00 14.28      1SG 
ATOM    282  HA  GLU    19      26.687  19.663  68.673  1.00   .00      1SG 
ATOM    283  CB  GLU    19      28.430  20.553  67.789  1.00 16.03      1SG 
ATOM    284  HB1 GLU    19      28.056  21.595  67.875  1.00   .00      1SG 
ATOM    285  HB2 GLU    19      29.000  20.452  66.841  1.00   .00      1SG 
ATOM    286  CG  GLU    19      29.371  20.266  68.965  1.00 25.16      1SG 
ATOM    287  HG1 GLU    19      30.283  20.894  68.869  1.00   .00      1SG 
ATOM    288  HG2 GLU    19      29.663  19.194  68.950  1.00   .00      1SG 
ATOM    289  CD  GLU    19      28.703  20.572  70.282  1.00 27.63      1SG 
ATOM    290  OE1 GLU    19      28.180  21.702  70.430  1.00 37.86      1SG 
ATOM    291  OE2 GLU    19      28.686  19.701  71.157  1.00 33.12      1SG 
ATOM    292  C   GLU    19      26.271  20.038  66.673  1.00 12.03      1SG 
ATOM    293  O   GLU    19      26.365  19.612  65.526  1.00 13.75      1SG 
ATOM    294  N   PRO    20      25.306  20.882  67.047  1.00 13.19      1SG 
ATOM    295  CD  PRO    20      25.019  21.396  68.399  1.00 15.52      1SG 
ATOM    296  HD1 PRO    20      25.955  21.731  68.892  1.00   .00      1SG 
ATOM    297  HD2 PRO    20      24.524  20.615  69.013  1.00   .00      1SG 
ATOM    298  CA  PRO    20      24.307  21.349  66.063  1.00 11.59      1SG 
ATOM    299  HA  PRO    20      23.912  20.516  65.504  1.00   .00      1SG 
ATOM    300  CB  PRO    20      23.273  22.090  66.932  1.00 14.28      1SG 
ATOM    301  HB1 PRO    20      22.463  21.404  67.260  1.00   .00      1SG 
ATOM    302  HB2 PRO    20      22.822  22.940  66.377  1.00   .00      1SG 
ATOM    303  CG  PRO    20      24.074  22.575  68.101  1.00 18.31      1SG 
ATOM    304  HG1 PRO    20      24.646  23.491  67.842  1.00   .00      1SG 
ATOM    305  HG2 PRO    20      23.420  22.794  68.972  1.00   .00      1SG 
ATOM    306  C   PRO    20      24.931  22.252  65.021  1.00 13.46      1SG 
ATOM    307  O   PRO    20      25.964  22.878  65.254  1.00 16.19      1SG 
ATOM    308  N   ARG    21      24.301  22.293  63.863  1.00 14.82      1SG 
ATOM    309  HN  ARG    21      23.495  21.736  63.679  1.00   .00      1SG 
ATOM    310  CA  ARG    21      24.746  23.161  62.772  1.00 15.56      1SG 
ATOM    311  HA  ARG    21      25.821  23.090  62.702  1.00   .00      1SG 
ATOM    312  CB  ARG    21      24.092  22.725  61.451  1.00 15.64      1SG 
ATOM    313  HB1 ARG    21      22.990  22.757  61.581  1.00   .00      1SG 
ATOM    314  HB2 ARG    21      24.400  21.680  61.238  1.00   .00      1SG 
ATOM    315  CG  ARG    21      24.469  23.615  60.204  1.00 18.48      1SG 
ATOM    316  HG1 ARG    21      24.264  24.681  60.438  1.00   .00      1SG 
ATOM    317  HG2 ARG    21      23.847  23.312  59.335  1.00   .00      1SG 
ATOM    318  CD  ARG    21      25.959  23.449  59.847  1.00 23.18      1SG 
ATOM    319  HD1 ARG    21      26.186  22.367  59.739  1.00   .00      1SG 
ATOM    320  HD2 ARG    21      26.576  23.890  60.659  1.00   .00      1SG 
ATOM    321  NE  ARG    21      26.375  24.101  58.591  1.00 23.53      1SG 
ATOM    322  HE  ARG    21      26.935  24.925  58.661  1.00   .00      1SG 
ATOM    323  CZ  ARG    21      26.058  23.671  57.370  1.00 27.91      1SG 
ATOM    324  NH1 ARG    21      25.298  22.590  57.215  1.00 27.69      1SG 
ATOM    325 HH11 ARG    21      24.962  22.096  58.017  1.00   .00      1SG 
ATOM    326 HH12 ARG    21      25.063  22.271  56.297  1.00   .00      1SG 
ATOM    327  NH2 ARG    21      26.550  24.285  56.289  1.00 22.74      1SG 
ATOM    328 HH21 ARG    21      26.434  23.874  55.385  1.00   .00      1SG 
ATOM    329 HH22 ARG    21      27.034  25.155  56.385  1.00   .00      1SG 
ATOM    330  C   ARG    21      24.223  24.559  63.136  1.00 17.92      1SG 
ATOM    331  O   ARG    21      23.112  24.692  63.673  1.00 18.84      1SG 
ATOM    332  N   PHE    22      25.021  25.603  62.887  1.00 12.77      1SG 
ATOM    333  HN  PHE    22      25.947  25.514  62.527  1.00   .00      1SG 
ATOM    334  CA  PHE    22      24.529  26.947  63.149  1.00 13.34      1SG 
ATOM    335  HA  PHE    22      23.454  26.891  63.240  1.00   .00      1SG 
ATOM    336  CB  PHE    22      25.130  27.539  64.421  1.00 13.02      1SG 
ATOM    337  HB1 PHE    22      26.231  27.627  64.302  1.00   .00      1SG 
ATOM    338  HB2 PHE    22      24.890  26.881  65.283  1.00   .00      1SG 
ATOM    339  CG  PHE    22      24.601  28.915  64.744  1.00 16.08      1SG 
ATOM    340  CD1 PHE    22      23.305  29.095  65.211  1.00 21.12      1SG 
ATOM    341  HD1 PHE    22      22.660  28.238  65.335  1.00   .00      1SG 
ATOM    342  CE1 PHE    22      22.825  30.371  65.522  1.00 26.38      1SG 
ATOM    343  HE1 PHE    22      21.816  30.499  65.886  1.00   .00      1SG 
ATOM    344  CZ  PHE    22      23.658  31.475  65.359  1.00 23.70      1SG 
ATOM    345  HZ  PHE    22      23.295  32.464  65.597  1.00   .00      1SG 
ATOM    346  CD2 PHE    22      25.425  30.036  64.583  1.00 23.62      1SG 
ATOM    347  HD2 PHE    22      26.433  29.911  64.217  1.00   .00      1SG 
ATOM    348  CE2 PHE    22      24.956  31.306  64.890  1.00 21.17      1SG 
ATOM    349  HE2 PHE    22      25.600  32.164  64.764  1.00   .00      1SG 
ATOM    350  C   PHE    22      24.897  27.827  61.971  1.00 14.70      1SG 
ATOM    351  O   PHE    22      26.055  27.919  61.610  1.00 15.56      1SG 
ATOM    352  N   ILE    23      23.906  28.466  61.370  1.00 12.00      1SG 
ATOM    353  HN  ILE    23      22.954  28.386  61.655  1.00   .00      1SG 
ATOM    354  CA  ILE    23      24.190  29.338  60.232  1.00 13.65      1SG 
ATOM    355  HA  ILE    23      25.260  29.468  60.170  1.00   .00      1SG 
ATOM    356  CB  ILE    23      23.648  28.725  58.922  1.00 16.88      1SG 
ATOM    357  HB  ILE    23      22.572  28.479  59.047  1.00   .00      1SG 
ATOM    358  CG2 ILE    23      23.814  29.721  57.759  1.00 16.82      1SG 
ATOM    359 HG21 ILE    23      24.855  30.108  57.733  1.00   .00      1SG 
ATOM    360 HG22 ILE    23      23.120  30.578  57.893  1.00   .00      1SG 
ATOM    361 HG23 ILE    23      23.600  29.214  56.794  1.00   .00      1SG 
ATOM    362  CG1 ILE    23      24.392  27.427  58.630  1.00 17.88      1SG 
ATOM    363 HG11 ILE    23      24.455  26.834  59.567  1.00   .00      1SG 
ATOM    364 HG12 ILE    23      25.420  27.674  58.291  1.00   .00      1SG 
ATOM    365  CD  ILE    23      23.713  26.580  57.558  1.00 22.05      1SG 
ATOM    366  HD1 ILE    23      23.810  27.070  56.566  1.00   .00      1SG 
ATOM    367  HD2 ILE    23      22.633  26.467  57.793  1.00   .00      1SG 
ATOM    368  HD3 ILE    23      24.192  25.579  57.508  1.00   .00      1SG 
ATOM    369  C   ILE    23      23.518  30.678  60.453  1.00 16.99      1SG 
ATOM    370  O   ILE    23      22.319  30.728  60.765  1.00 16.49      1SG 
ATOM    371  N   ALA    24      24.275  31.769  60.271  1.00 11.25      1SG 
ATOM    372  HN  ALA    24      25.237  31.734  60.011  1.00   .00      1SG 
ATOM    373  CA  ALA    24      23.682  33.072  60.457  1.00 12.91      1SG 
ATOM    374  HA  ALA    24      22.620  32.939  60.597  1.00   .00      1SG 
ATOM    375  CB  ALA    24      24.297  33.777  61.675  1.00 12.90      1SG 
ATOM    376  HB1 ALA    24      25.391  33.904  61.531  1.00   .00      1SG 
ATOM    377  HB2 ALA    24      24.128  33.169  62.589  1.00   .00      1SG 
ATOM    378  HB3 ALA    24      23.838  34.780  61.803  1.00   .00      1SG 
ATOM    379  C   ALA    24      23.985  33.879  59.197  1.00 15.84      1SG 
ATOM    380  O   ALA    24      25.092  33.792  58.659  1.00 14.62      1SG 
ATOM    381  N   VAL    25      23.004  34.635  58.719  1.00 11.96      1SG 
ATOM    382  HN  VAL    25      22.087  34.649  59.109  1.00   .00      1SG 
ATOM    383  CA  VAL    25      23.254  35.504  57.559  1.00 11.75      1SG 
ATOM    384  HA  VAL    25      24.320  35.656  57.483  1.00   .00      1SG 
ATOM    385  CB  VAL    25      22.711  34.872  56.253  1.00 16.71      1SG 
ATOM    386  HB  VAL    25      22.867  35.573  55.405  1.00   .00      1SG 
ATOM    387  CG1 VAL    25      23.456  33.550  55.977  1.00 17.65      1SG 
ATOM    388 HG11 VAL    25      23.301  32.841  56.818  1.00   .00      1SG 
ATOM    389 HG12 VAL    25      24.545  33.744  55.873  1.00   .00      1SG 
ATOM    390 HG13 VAL    25      23.069  33.085  55.045  1.00   .00      1SG 
ATOM    391  CG2 VAL    25      21.216  34.610  56.351  1.00 16.68      1SG 
ATOM    392 HG21 VAL    25      20.672  35.562  56.530  1.00   .00      1SG 
ATOM    393 HG22 VAL    25      21.008  33.919  57.195  1.00   .00      1SG 
ATOM    394 HG23 VAL    25      20.847  34.164  55.403  1.00   .00      1SG 
ATOM    395  C   VAL    25      22.594  36.850  57.806  1.00 15.24      1SG 
ATOM    396  O   VAL    25      21.580  36.922  58.491  1.00 14.36      1SG 
ATOM    397  N   GLY    26      23.183  37.911  57.254  1.00 11.98      1SG 
ATOM    398  HN  GLY    26      24.013  37.836  56.707  1.00   .00      1SG 
ATOM    399  CA  GLY    26      22.637  39.257  57.423  1.00 14.01      1SG 
ATOM    400  HA1 GLY    26      23.364  39.872  57.932  1.00   .00      1SG 
ATOM    401  HA2 GLY    26      21.727  39.199  58.001  1.00   .00      1SG 
ATOM    402  C   GLY    26      22.347  39.822  56.040  1.00 14.44      1SG 
ATOM    403  O   GLY    26      23.104  39.588  55.086  1.00 12.34      1SG 
ATOM    404  N   TYR    27      21.225  40.526  55.935  1.00 12.48      1SG 
ATOM    405  HN  TYR    27      20.624  40.675  56.716  1.00   .00      1SG 
ATOM    406  CA  TYR    27      20.793  41.129  54.678  1.00 14.98      1SG 
ATOM    407  HA  TYR    27      21.589  41.011  53.957  1.00   .00      1SG 
ATOM    408  CB  TYR    27      19.504  40.446  54.173  1.00 15.30      1SG 
ATOM    409  HB1 TYR    27      19.003  41.122  53.448  1.00   .00      1SG 
ATOM    410  HB2 TYR    27      18.838  40.255  55.041  1.00   .00      1SG 
ATOM    411  CG  TYR    27      19.689  39.127  53.474  1.00 20.61      1SG 
ATOM    412  CD1 TYR    27      19.819  37.932  54.195  1.00 23.64      1SG 
ATOM    413  HD1 TYR    27      19.821  37.958  55.275  1.00   .00      1SG 
ATOM    414  CE1 TYR    27      19.947  36.696  53.529  1.00 22.53      1SG 
ATOM    415  HE1 TYR    27      20.040  35.782  54.096  1.00   .00      1SG 
ATOM    416  CZ  TYR    27      19.953  36.659  52.150  1.00 24.04      1SG 
ATOM    417  OH  TYR    27      20.069  35.446  51.497  1.00 27.38      1SG 
ATOM    418  HH  TYR    27      19.480  35.459  50.739  1.00   .00      1SG 
ATOM    419  CD2 TYR    27      19.700  39.061  52.086  1.00 21.55      1SG 
ATOM    420  HD2 TYR    27      19.605  39.970  51.510  1.00   .00      1SG 
ATOM    421  CE2 TYR    27      19.834  37.825  51.416  1.00 20.97      1SG 
ATOM    422  HE2 TYR    27      19.843  37.791  50.337  1.00   .00      1SG 
ATOM    423  C   TYR    27      20.409  42.611  54.884  1.00 16.69      1SG 
ATOM    424  O   TYR    27      19.949  42.980  55.949  1.00 13.25      1SG 
ATOM    425  N   VAL    28      20.651  43.448  53.877  1.00 16.63      1SG 
ATOM    426  HN  VAL    28      21.198  43.192  53.084  1.00   .00      1SG 
ATOM    427  CA  VAL    28      20.113  44.808  53.892  1.00 17.35      1SG 
ATOM    428  HA  VAL    28      19.615  44.939  54.841  1.00   .00      1SG 
ATOM    429  CB  VAL    28      21.161  45.913  53.712  1.00 17.54      1SG 
ATOM    430  HB  VAL    28      21.837  45.653  52.870  1.00   .00      1SG 
ATOM    431  CG1 VAL    28      20.456  47.233  53.416  1.00 21.24      1SG 
ATOM    432 HG11 VAL    28      19.653  47.413  54.163  1.00   .00      1SG 
ATOM    433 HG12 VAL    28      19.998  47.199  52.404  1.00   .00      1SG 
ATOM    434 HG13 VAL    28      21.184  48.071  53.469  1.00   .00      1SG 
ATOM    435  CG2 VAL    28      21.968  46.042  54.982  1.00 18.56      1SG 
ATOM    436 HG21 VAL    28      22.481  45.083  55.208  1.00   .00      1SG 
ATOM    437 HG22 VAL    28      21.298  46.295  55.832  1.00   .00      1SG 
ATOM    438 HG23 VAL    28      22.737  46.835  54.863  1.00   .00      1SG 
ATOM    439  C   VAL    28      19.276  44.666  52.637  1.00 15.62      1SG 
ATOM    440  O   VAL    28      19.804  44.312  51.583  1.00 15.59      1SG 
ATOM    441  N   ASP    29      17.981  44.914  52.758  1.00 15.90      1SG 
ATOM    442  HN  ASP    29      17.593  45.266  53.606  1.00   .00      1SG 
ATOM    443  CA  ASP    29      17.033  44.695  51.676  1.00 21.37      1SG 
ATOM    444  HA  ASP    29      16.037  44.725  52.093  1.00   .00      1SG 
ATOM    445  CB  ASP    29      17.188  45.771  50.588  1.00 23.18      1SG 
ATOM    446  HB1 ASP    29      16.473  45.561  49.765  1.00   .00      1SG 
ATOM    447  HB2 ASP    29      18.224  45.738  50.188  1.00   .00      1SG 
ATOM    448  CG  ASP    29      16.917  47.172  51.125  1.00 29.14      1SG 
ATOM    449  OD1 ASP    29      16.131  47.289  52.100  1.00 24.55      1SG 
ATOM    450  OD2 ASP    29      17.479  48.147  50.577  1.00 28.09      1SG 
ATOM    451  C   ASP    29      17.239  43.263  51.135  1.00 18.29      1SG 
ATOM    452  O   ASP    29      17.255  42.300  51.919  1.00 17.52      1SG 
ATOM    453  N   ASP    30      17.409  43.099  49.826  1.00 17.13      1SG 
ATOM    454  HN  ASP    30      17.414  43.858  49.180  1.00   .00      1SG 
ATOM    455  CA  ASP    30      17.600  41.759  49.276  1.00 17.58      1SG 
ATOM    456  HA  ASP    30      17.279  41.042  50.017  1.00   .00      1SG 
ATOM    457  CB  ASP    30      16.785  41.594  47.980  1.00 20.82      1SG 
ATOM    458  HB1 ASP    30      16.951  40.573  47.576  1.00   .00      1SG 
ATOM    459  HB2 ASP    30      17.133  42.342  47.236  1.00   .00      1SG 
ATOM    460  CG  ASP    30      15.295  41.790  48.203  1.00 22.17      1SG 
ATOM    461  OD1 ASP    30      14.728  41.136  49.118  1.00 27.01      1SG 
ATOM    462  OD2 ASP    30      14.690  42.595  47.463  1.00 23.27      1SG 
ATOM    463  C   ASP    30      19.084  41.442  49.015  1.00 20.47      1SG 
ATOM    464  O   ASP    30      19.410  40.542  48.244  1.00 20.55      1SG 
ATOM    465  N   THR    31      19.986  42.164  49.675  1.00 15.19      1SG 
ATOM    466  HN  THR    31      19.742  42.890  50.313  1.00   .00      1SG 
ATOM    467  CA  THR    31      21.404  41.904  49.476  1.00 17.20      1SG 
ATOM    468  HA  THR    31      21.505  41.166  48.694  1.00   .00      1SG 
ATOM    469  CB  THR    31      22.128  43.202  49.087  1.00 21.24      1SG 
ATOM    470  HB  THR    31      21.997  43.966  49.883  1.00   .00      1SG 
ATOM    471  OG1 THR    31      21.561  43.696  47.858  1.00 17.82      1SG 
ATOM    472  HG1 THR    31      20.678  44.001  48.078  1.00   .00      1SG 
ATOM    473  CG2 THR    31      23.619  42.966  48.940  1.00 21.27      1SG 
ATOM    474 HG21 THR    31      23.804  42.087  48.287  1.00   .00      1SG 
ATOM    475 HG22 THR    31      24.071  42.769  49.936  1.00   .00      1SG 
ATOM    476 HG23 THR    31      24.099  43.856  48.481  1.00   .00      1SG 
ATOM    477  C   THR    31      22.068  41.320  50.718  1.00 16.76      1SG 
ATOM    478  O   THR    31      22.087  41.957  51.773  1.00 14.61      1SG 
ATOM    479  N   GLN    32      22.625  40.114  50.595  1.00 16.70      1SG 
ATOM    480  HN  GLN    32      22.612  39.585  49.750  1.00   .00      1SG 
ATOM    481  CA  GLN    32      23.299  39.519  51.759  1.00 17.50      1SG 
ATOM    482  HA  GLN    32      22.649  39.639  52.613  1.00   .00      1SG 
ATOM    483  CB  GLN    32      23.606  38.041  51.539  1.00 18.78      1SG 
ATOM    484  HB1 GLN    32      24.352  37.946  50.722  1.00   .00      1SG 
ATOM    485  HB2 GLN    32      22.673  37.520  51.236  1.00   .00      1SG 
ATOM    486  CG  GLN    32      24.168  37.365  52.815  1.00 17.13      1SG 
ATOM    487  HG1 GLN    32      23.385  37.380  53.603  1.00   .00      1SG 
ATOM    488  HG2 GLN    32      25.051  37.940  53.166  1.00   .00      1SG 
ATOM    489  CD  GLN    32      24.592  35.931  52.592  1.00 27.44      1SG 
ATOM    490  OE1 GLN    32      24.204  35.296  51.612  1.00 30.03      1SG 
ATOM    491  NE2 GLN    32      25.371  35.402  53.512  1.00 22.92      1SG 
ATOM    492 HE21 GLN    32      25.805  34.516  53.350  1.00   .00      1SG 
ATOM    493 HE22 GLN    32      25.529  35.887  54.372  1.00   .00      1SG 
ATOM    494  C   GLN    32      24.619  40.233  52.007  1.00 17.42      1SG 
ATOM    495  O   GLN    32      25.347  40.576  51.048  1.00 17.36      1SG 
ATOM    496  N   PHE    33      24.966  40.467  53.265  1.00 12.56      1SG 
ATOM    497  HN  PHE    33      24.411  40.232  54.059  1.00   .00      1SG 
ATOM    498  CA  PHE    33      26.253  41.114  53.480  1.00 14.78      1SG 
ATOM    499  HA  PHE    33      26.820  41.027  52.565  1.00   .00      1SG 
ATOM    500  CB  PHE    33      26.100  42.600  53.865  1.00 13.84      1SG 
ATOM    501  HB1 PHE    33      25.426  43.097  53.135  1.00   .00      1SG 
ATOM    502  HB2 PHE    33      27.100  43.083  53.852  1.00   .00      1SG 
ATOM    503  CG  PHE    33      25.513  42.834  55.239  1.00 15.02      1SG 
ATOM    504  CD1 PHE    33      24.139  42.658  55.462  1.00 14.76      1SG 
ATOM    505  HD1 PHE    33      23.507  42.351  54.642  1.00   .00      1SG 
ATOM    506  CE1 PHE    33      23.576  42.869  56.707  1.00 13.35      1SG 
ATOM    507  HE1 PHE    33      22.516  42.723  56.851  1.00   .00      1SG 
ATOM    508  CZ  PHE    33      24.382  43.273  57.786  1.00 15.80      1SG 
ATOM    509  HZ  PHE    33      23.941  43.438  58.758  1.00   .00      1SG 
ATOM    510  CD2 PHE    33      26.325  43.236  56.302  1.00 18.42      1SG 
ATOM    511  HD2 PHE    33      27.384  43.378  56.147  1.00   .00      1SG 
ATOM    512  CE2 PHE    33      25.754  43.461  57.601  1.00 17.07      1SG 
ATOM    513  HE2 PHE    33      26.378  43.772  58.425  1.00   .00      1SG 
ATOM    514  C   PHE    33      27.200  40.433  54.442  1.00 15.40      1SG 
ATOM    515  O   PHE    33      28.393  40.730  54.446  1.00 16.42      1SG 
ATOM    516  N   VAL    34      26.701  39.520  55.263  1.00 11.64      1SG 
ATOM    517  HN  VAL    34      25.732  39.290  55.303  1.00   .00      1SG 
ATOM    518  CA  VAL    34      27.597  38.803  56.163  1.00 12.49      1SG 
ATOM    519  HA  VAL    34      28.569  38.777  55.694  1.00   .00      1SG 
ATOM    520  CB  VAL    34      27.715  39.454  57.576  1.00 17.28      1SG 
ATOM    521  HB  VAL    34      28.247  38.758  58.259  1.00   .00      1SG 
ATOM    522  CG1 VAL    34      28.489  40.777  57.493  1.00 18.69      1SG 
ATOM    523 HG11 VAL    34      27.963  41.485  56.818  1.00   .00      1SG 
ATOM    524 HG12 VAL    34      29.508  40.594  57.091  1.00   .00      1SG 
ATOM    525 HG13 VAL    34      28.562  41.236  58.502  1.00   .00      1SG 
ATOM    526  CG2 VAL    34      26.303  39.651  58.189  1.00 15.06      1SG 
ATOM    527 HG21 VAL    34      25.789  38.671  58.286  1.00   .00      1SG 
ATOM    528 HG22 VAL    34      25.694  40.307  57.532  1.00   .00      1SG 
ATOM    529 HG23 VAL    34      26.389  40.108  59.198  1.00   .00      1SG 
ATOM    530  C   VAL    34      27.067  37.389  56.380  1.00 13.86      1SG 
ATOM    531  O   VAL    34      25.887  37.133  56.155  1.00 14.65      1SG 
ATOM    532  N   ARG    35      27.948  36.471  56.767  1.00 14.00      1SG 
ATOM    533  HN  ARG    35      28.923  36.666  56.845  1.00   .00      1SG 
ATOM    534  CA  ARG    35      27.525  35.102  57.105  1.00 14.67      1SG 
ATOM    535  HA  ARG    35      26.521  35.154  57.499  1.00   .00      1SG 
ATOM    536  CB  ARG    35      27.563  34.181  55.873  1.00 19.67      1SG 
ATOM    537  HB1 ARG    35      26.865  34.577  55.105  1.00   .00      1SG 
ATOM    538  HB2 ARG    35      27.229  33.165  56.172  1.00   .00      1SG 
ATOM    539  CG  ARG    35      28.957  34.084  55.269  1.00 20.72      1SG 
ATOM    540  HG1 ARG    35      29.503  35.018  55.518  1.00   .00      1SG 
ATOM    541  HG2 ARG    35      28.847  34.012  54.167  1.00   .00      1SG 
ATOM    542  CD  ARG    35      29.814  32.897  55.737  1.00 26.07      1SG 
ATOM    543  HD1 ARG    35      29.700  32.763  56.834  1.00   .00      1SG 
ATOM    544  HD2 ARG    35      30.880  33.083  55.484  1.00   .00      1SG 
ATOM    545  NE  ARG    35      29.417  31.645  55.093  1.00 26.87      1SG 
ATOM    546  HE  ARG    35      28.461  31.554  54.819  1.00   .00      1SG 
ATOM    547  CZ  ARG    35      30.229  30.612  54.840  1.00 30.89      1SG 
ATOM    548  NH1 ARG    35      31.527  30.651  55.171  1.00 24.76      1SG 
ATOM    549 HH11 ARG    35      31.874  31.392  55.745  1.00   .00      1SG 
ATOM    550 HH12 ARG    35      32.148  29.939  54.843  1.00   .00      1SG 
ATOM    551  NH2 ARG    35      29.739  29.527  54.240  1.00 26.46      1SG 
ATOM    552 HH21 ARG    35      28.818  29.544  53.850  1.00   .00      1SG 
ATOM    553 HH22 ARG    35      30.292  28.696  54.180  1.00   .00      1SG 
ATOM    554  C   ARG    35      28.441  34.514  58.145  1.00 14.82      1SG 
ATOM    555  O   ARG    35      29.576  34.972  58.342  1.00 17.09      1SG 
ATOM    556  N   PHE    36      27.919  33.518  58.854  1.00 11.16      1SG 
ATOM    557  HN  PHE    36      26.963  33.246  58.774  1.00   .00      1SG 
ATOM    558  CA  PHE    36      28.729  32.768  59.793  1.00 14.91      1SG 
ATOM    559  HA  PHE    36      29.764  32.948  59.542  1.00   .00      1SG 
ATOM    560  CB  PHE    36      28.478  33.155  61.248  1.00 11.66      1SG 
ATOM    561  HB1 PHE    36      27.392  33.082  61.471  1.00   .00      1SG 
ATOM    562  HB2 PHE    36      28.835  34.192  61.424  1.00   .00      1SG 
ATOM    563  CG  PHE    36      29.202  32.254  62.213  1.00 17.48      1SG 
ATOM    564  CD1 PHE    36      30.536  32.480  62.526  1.00 16.48      1SG 
ATOM    565  HD1 PHE    36      31.056  33.319  62.088  1.00   .00      1SG 
ATOM    566  CE1 PHE    36      31.207  31.629  63.403  1.00 19.10      1SG 
ATOM    567  HE1 PHE    36      32.241  31.817  63.650  1.00   .00      1SG 
ATOM    568  CZ  PHE    36      30.553  30.545  63.958  1.00 22.43      1SG 
ATOM    569  HZ  PHE    36      31.081  29.885  64.630  1.00   .00      1SG 
ATOM    570  CD2 PHE    36      28.543  31.158  62.786  1.00 20.99      1SG 
ATOM    571  HD2 PHE    36      27.504  30.978  62.551  1.00   .00      1SG 
ATOM    572  CE2 PHE    36      29.208  30.299  63.653  1.00 22.97      1SG 
ATOM    573  HE2 PHE    36      28.695  29.453  64.086  1.00   .00      1SG 
ATOM    574  C   PHE    36      28.215  31.346  59.618  1.00 15.60      1SG 
ATOM    575  O   PHE    36      27.002  31.140  59.586  1.00 14.22      1SG 
ATOM    576  N   ASP    37      29.102  30.362  59.499  1.00 15.39      1SG 
ATOM    577  HN  ASP    37      30.088  30.509  59.487  1.00   .00      1SG 
ATOM    578  CA  ASP    37      28.621  28.976  59.378  1.00 16.51      1SG 
ATOM    579  HA  ASP    37      27.588  28.955  59.691  1.00   .00      1SG 
ATOM    580  CB  ASP    37      28.748  28.465  57.925  1.00 18.26      1SG 
ATOM    581  HB1 ASP    37      29.823  28.447  57.645  1.00   .00      1SG 
ATOM    582  HB2 ASP    37      28.207  29.163  57.252  1.00   .00      1SG 
ATOM    583  CG  ASP    37      28.168  27.045  57.722  1.00 22.67      1SG 
ATOM    584  OD1 ASP    37      28.035  26.259  58.695  1.00 20.14      1SG 
ATOM    585  OD2 ASP    37      27.849  26.716  56.559  1.00 27.63      1SG 
ATOM    586  C   ASP    37      29.501  28.144  60.304  1.00 19.41      1SG 
ATOM    587  O   ASP    37      30.715  28.127  60.123  1.00 17.15      1SG 
ATOM    588  N   SER    38      28.887  27.463  61.275  1.00 16.63      1SG 
ATOM    589  HN  SER    38      27.897  27.486  61.386  1.00   .00      1SG 
ATOM    590  CA  SER    38      29.618  26.636  62.244  1.00 17.21      1SG 
ATOM    591  HA  SER    38      30.274  27.282  62.808  1.00   .00      1SG 
ATOM    592  CB  SER    38      28.635  25.914  63.187  1.00 16.21      1SG 
ATOM    593  HB1 SER    38      28.002  26.657  63.717  1.00   .00      1SG 
ATOM    594  HB2 SER    38      29.197  25.309  63.931  1.00   .00      1SG 
ATOM    595  OG  SER    38      27.805  25.058  62.427  1.00 15.66      1SG 
ATOM    596  HG1 SER    38      28.369  24.343  62.123  1.00   .00      1SG 
ATOM    597  C   SER    38      30.493  25.590  61.554  1.00 18.09      1SG 
ATOM    598  O   SER    38      31.503  25.142  62.125  1.00 20.54      1SG 
ATOM    599  N   ASP    39      30.125  25.203  60.335  1.00 18.95      1SG 
ATOM    600  HN  ASP    39      29.329  25.576  59.864  1.00   .00      1SG 
ATOM    601  CA  ASP    39      30.902  24.185  59.625  1.00 25.17      1SG 
ATOM    602  HA  ASP    39      31.462  23.616  60.352  1.00   .00      1SG 
ATOM    603  CB  ASP    39      29.954  23.272  58.841  1.00 25.96      1SG 
ATOM    604  HB1 ASP    39      30.548  22.668  58.123  1.00   .00      1SG 
ATOM    605  HB2 ASP    39      29.232  23.901  58.279  1.00   .00      1SG 
ATOM    606  CG  ASP    39      29.151  22.299  59.757  1.00 26.67      1SG 
ATOM    607  OD1 ASP    39      29.123  22.421  61.030  1.00 29.32      1SG 
ATOM    608  OD2 ASP    39      28.531  21.394  59.172  1.00 34.76      1SG 
ATOM    609  C   ASP    39      31.994  24.759  58.686  1.00 25.37      1SG 
ATOM    610  O   ASP    39      32.718  23.992  58.021  1.00 28.80      1SG 
ATOM    611  N   ALA    40      32.112  26.088  58.628  1.00 22.96      1SG 
ATOM    612  HN  ALA    40      31.530  26.698  59.161  1.00   .00      1SG 
ATOM    613  CA  ALA    40      33.118  26.735  57.766  1.00 20.84      1SG 
ATOM    614  HA  ALA    40      33.252  26.118  56.890  1.00   .00      1SG 
ATOM    615  CB  ALA    40      32.663  28.155  57.357  1.00 21.16      1SG 
ATOM    616  HB1 ALA    40      32.518  28.785  58.261  1.00   .00      1SG 
ATOM    617  HB2 ALA    40      31.700  28.099  56.805  1.00   .00      1SG 
ATOM    618  HB3 ALA    40      33.435  28.629  56.715  1.00   .00      1SG 
ATOM    619  C   ALA    40      34.471  26.784  58.460  1.00 21.01      1SG 
ATOM    620  O   ALA    40      34.575  26.531  59.652  1.00 20.64      1SG 
ATOM    621  N   ALA    41      35.512  27.137  57.719  1.00 22.00      1SG 
ATOM    622  HN  ALA    41      35.422  27.422  56.768  1.00   .00      1SG 
ATOM    623  CA  ALA    41      36.871  27.124  58.274  1.00 25.38      1SG 
ATOM    624  HA  ALA    41      36.965  26.270  58.928  1.00   .00      1SG 
ATOM    625  CB  ALA    41      37.898  27.038  57.104  1.00 26.94      1SG 
ATOM    626  HB1 ALA    41      37.784  27.914  56.430  1.00   .00      1SG 
ATOM    627  HB2 ALA    41      37.723  26.112  56.515  1.00   .00      1SG 
ATOM    628  HB3 ALA    41      38.933  27.034  57.509  1.00   .00      1SG 
ATOM    629  C   ALA    41      37.259  28.255  59.203  1.00 24.56      1SG 
ATOM    630  O   ALA    41      37.925  28.050  60.202  1.00 22.37      1SG 
ATOM    631  N   SER    42      36.819  29.463  58.897  1.00 24.88      1SG 
ATOM    632  HN  SER    42      36.214  29.644  58.126  1.00   .00      1SG 
ATOM    633  CA  SER    42      37.223  30.605  59.710  1.00 22.95      1SG 
ATOM    634  HA  SER    42      38.296  30.576  59.833  1.00   .00      1SG 
ATOM    635  CB  SER    42      36.794  31.893  59.006  1.00 24.98      1SG 
ATOM    636  HB1 SER    42      37.047  31.831  57.926  1.00   .00      1SG 
ATOM    637  HB2 SER    42      37.319  32.760  59.460  1.00   .00      1SG 
ATOM    638  OG  SER    42      35.387  32.088  59.137  1.00 28.59      1SG 
ATOM    639  HG1 SER    42      35.061  32.265  58.252  1.00   .00      1SG 
ATOM    640  C   SER    42      36.731  30.678  61.148  1.00 23.08      1SG 
ATOM    641  O   SER    42      37.433  31.189  62.026  1.00 23.64      1SG 
ATOM    642  N   GLN    43      35.515  30.189  61.395  1.00 19.12      1SG 
ATOM    643  HN  GLN    43      34.975  29.725  60.697  1.00   .00      1SG 
ATOM    644  CA  GLN    43      34.903  30.308  62.713  1.00 19.80      1SG 
ATOM    645  HA  GLN    43      33.895  29.927  62.647  1.00   .00      1SG 
ATOM    646  CB  GLN    43      35.696  29.526  63.761  1.00 27.69      1SG 
ATOM    647  HB1 GLN    43      35.262  29.721  64.765  1.00   .00      1SG 
ATOM    648  HB2 GLN    43      36.751  29.874  63.752  1.00   .00      1SG 
ATOM    649  CG  GLN    43      35.663  28.006  63.483  1.00 25.90      1SG 
ATOM    650  HG1 GLN    43      36.266  27.487  64.258  1.00   .00      1SG 
ATOM    651  HG2 GLN    43      36.110  27.815  62.485  1.00   .00      1SG 
ATOM    652  CD  GLN    43      34.242  27.413  63.498  1.00 29.73      1SG 
ATOM    653  OE1 GLN    43      33.526  27.520  64.496  1.00 31.53      1SG 
ATOM    654  NE2 GLN    43      33.843  26.772  62.394  1.00 25.71      1SG 
ATOM    655 HE21 GLN    43      32.995  26.242  62.402  1.00   .00      1SG 
ATOM    656 HE22 GLN    43      34.393  26.822  61.560  1.00   .00      1SG 
ATOM    657  C   GLN    43      34.784  31.795  63.054  1.00 19.59      1SG 
ATOM    658  O   GLN    43      34.896  32.226  64.214  1.00 19.69      1SG 
ATOM    659  N   ARG    44      34.496  32.587  62.017  1.00 17.73      1SG 
ATOM    660  HN  ARG    44      34.379  32.243  61.088  1.00   .00      1SG 
ATOM    661  CA  ARG    44      34.339  34.023  62.215  1.00 18.65      1SG 
ATOM    662  HA  ARG    44      34.123  34.197  63.259  1.00   .00      1SG 
ATOM    663  CB  ARG    44      35.634  34.769  61.800  1.00 19.46      1SG 
ATOM    664  HB1 ARG    44      35.438  35.862  61.821  1.00   .00      1SG 
ATOM    665  HB2 ARG    44      35.900  34.471  60.764  1.00   .00      1SG 
ATOM    666  CG  ARG    44      36.833  34.463  62.727  1.00 27.83      1SG 
ATOM    667  HG1 ARG    44      37.056  33.377  62.672  1.00   .00      1SG 
ATOM    668  HG2 ARG    44      36.550  34.720  63.770  1.00   .00      1SG 
ATOM    669  CD  ARG    44      38.090  35.238  62.358  1.00 32.24      1SG 
ATOM    670  HD1 ARG    44      38.453  34.899  61.364  1.00   .00      1SG 
ATOM    671  HD2 ARG    44      38.870  35.064  63.129  1.00   .00      1SG 
ATOM    672  NE  ARG    44      37.874  36.679  62.275  1.00 28.66      1SG 
ATOM    673  HE  ARG    44      37.803  37.080  61.363  1.00   .00      1SG 
ATOM    674  CZ  ARG    44      37.764  37.503  63.316  1.00 33.31      1SG 
ATOM    675  NH1 ARG    44      37.847  37.050  64.567  1.00 33.90      1SG 
ATOM    676 HH11 ARG    44      37.912  37.694  65.329  1.00   .00      1SG 
ATOM    677 HH12 ARG    44      37.844  36.066  64.744  1.00   .00      1SG 
ATOM    678  NH2 ARG    44      37.581  38.801  63.099  1.00 30.35      1SG 
ATOM    679 HH21 ARG    44      37.378  39.130  62.177  1.00   .00      1SG 
ATOM    680 HH22 ARG    44      37.646  39.449  63.858  1.00   .00      1SG 
ATOM    681  C   ARG    44      33.209  34.542  61.358  1.00 15.44      1SG 
ATOM    682  O   ARG    44      32.840  33.912  60.369  1.00 16.59      1SG 
ATOM    683  N   MET    45      32.691  35.704  61.732  1.00 15.98      1SG 
ATOM    684  HN  MET    45      32.956  36.172  62.572  1.00   .00      1SG 
ATOM    685  CA  MET    45      31.682  36.357  60.898  1.00 17.64      1SG 
ATOM    686  HA  MET    45      30.903  35.637  60.696  1.00   .00      1SG 
ATOM    687  CB  MET    45      31.100  37.580  61.593  1.00 14.53      1SG 
ATOM    688  HB1 MET    45      31.903  38.336  61.721  1.00   .00      1SG 
ATOM    689  HB2 MET    45      30.727  37.279  62.595  1.00   .00      1SG 
ATOM    690  CG  MET    45      29.943  38.213  60.801  1.00 20.77      1SG 
ATOM    691  HG1 MET    45      30.277  38.413  59.761  1.00   .00      1SG 
ATOM    692  HG2 MET    45      29.665  39.181  61.269  1.00   .00      1SG 
ATOM    693  SD  MET    45      28.511  37.083  60.795  1.00 25.93      1SG 
ATOM    694  CE  MET    45      27.665  37.721  62.164  1.00 24.21      1SG 
ATOM    695  HE1 MET    45      27.241  38.724  61.945  1.00   .00      1SG 
ATOM    696  HE2 MET    45      28.355  37.821  63.029  1.00   .00      1SG 
ATOM    697  HE3 MET    45      26.827  37.048  62.445  1.00   .00      1SG 
ATOM    698  C   MET    45      32.482  36.795  59.671  1.00 17.75      1SG 
ATOM    699  O   MET    45      33.603  37.314  59.802  1.00 16.36      1SG 
ATOM    700  N   GLU    46      31.933  36.560  58.485  1.00 12.86      1SG 
ATOM    701  HN  GLU    46      31.028  36.152  58.392  1.00   .00      1SG 
ATOM    702  CA  GLU    46      32.622  36.885  57.237  1.00 16.35      1SG 
ATOM    703  HA  GLU    46      33.550  37.378  57.485  1.00   .00      1SG 
ATOM    704  CB  GLU    46      32.896  35.607  56.423  1.00 21.41      1SG 
ATOM    705  HB1 GLU    46      33.488  35.892  55.528  1.00   .00      1SG 
ATOM    706  HB2 GLU    46      31.919  35.195  56.094  1.00   .00      1SG 
ATOM    707  CG  GLU    46      33.648  34.504  57.151  1.00 22.88      1SG 
ATOM    708  HG1 GLU    46      33.156  34.299  58.126  1.00   .00      1SG 
ATOM    709  HG2 GLU    46      34.696  34.826  57.333  1.00   .00      1SG 
ATOM    710  CD  GLU    46      33.656  33.234  56.323  1.00 27.90      1SG 
ATOM    711  OE1 GLU    46      33.963  33.334  55.115  1.00 36.63      1SG 
ATOM    712  OE2 GLU    46      33.347  32.149  56.846  1.00 29.82      1SG 
ATOM    713  C   GLU    46      31.820  37.798  56.329  1.00 18.12      1SG 
ATOM    714  O   GLU    46      30.580  37.727  56.258  1.00 15.22      1SG 
ATOM    715  N   PRO    47      32.529  38.617  55.544  1.00 16.85      1SG 
ATOM    716  CD  PRO    47      33.991  38.867  55.549  1.00 21.62      1SG 
ATOM    717  HD1 PRO    47      34.548  37.908  55.508  1.00   .00      1SG 
ATOM    718  HD2 PRO    47      34.283  39.438  56.455  1.00   .00      1SG 
ATOM    719  CA  PRO    47      31.828  39.519  54.644  1.00 16.17      1SG 
ATOM    720  HA  PRO    47      30.954  39.929  55.124  1.00   .00      1SG 
ATOM    721  CB  PRO    47      32.907  40.546  54.285  1.00 19.30      1SG 
ATOM    722  HB1 PRO    47      32.968  41.353  55.045  1.00   .00      1SG 
ATOM    723  HB2 PRO    47      32.718  41.003  53.290  1.00   .00      1SG 
ATOM    724  CG  PRO    47      34.178  39.688  54.275  1.00 21.13      1SG 
ATOM    725  HG1 PRO    47      34.228  39.041  53.374  1.00   .00      1SG 
ATOM    726  HG2 PRO    47      35.095  40.313  54.321  1.00   .00      1SG 
ATOM    727  C   PRO    47      31.302  38.816  53.393  1.00 18.44      1SG 
ATOM    728  O   PRO    47      31.894  37.852  52.911  1.00 16.83      1SG 
ATOM    729  N   ARG    48      30.198  39.317  52.866  1.00 17.33      1SG 
ATOM    730  HN  ARG    48      29.711  40.081  53.282  1.00   .00      1SG 
ATOM    731  CA  ARG    48      29.618  38.776  51.630  1.00 19.28      1SG 
ATOM    732  HA  ARG    48      30.393  38.238  51.106  1.00   .00      1SG 
ATOM    733  CB  ARG    48      28.441  37.843  51.942  1.00 20.29      1SG 
ATOM    734  HB1 ARG    48      27.871  37.656  51.007  1.00   .00      1SG 
ATOM    735  HB2 ARG    48      27.773  38.339  52.677  1.00   .00      1SG 
ATOM    736  CG  ARG    48      28.900  36.513  52.513  1.00 22.51      1SG 
ATOM    737  HG1 ARG    48      28.026  35.927  52.871  1.00   .00      1SG 
ATOM    738  HG2 ARG    48      29.593  36.680  53.365  1.00   .00      1SG 
ATOM    739  CD  ARG    48      29.610  35.766  51.398  1.00 27.52      1SG 
ATOM    740  HD1 ARG    48      30.556  36.296  51.157  1.00   .00      1SG 
ATOM    741  HD2 ARG    48      28.948  35.740  50.506  1.00   .00      1SG 
ATOM    742  NE  ARG    48      29.967  34.383  51.697  1.00 30.82      1SG 
ATOM    743  HE  ARG    48      29.293  33.676  51.488  1.00   .00      1SG 
ATOM    744  CZ  ARG    48      31.121  33.995  52.226  1.00 34.57      1SG 
ATOM    745  NH1 ARG    48      32.051  34.893  52.544  1.00 34.49      1SG 
ATOM    746 HH11 ARG    48      31.882  35.866  52.385  1.00   .00      1SG 
ATOM    747 HH12 ARG    48      32.918  34.595  52.942  1.00   .00      1SG 
ATOM    748  NH2 ARG    48      31.359  32.697  52.397  1.00 32.72      1SG 
ATOM    749 HH21 ARG    48      30.671  32.023  52.128  1.00   .00      1SG 
ATOM    750 HH22 ARG    48      32.226  32.396  52.795  1.00   .00      1SG 
ATOM    751  C   ARG    48      29.162  39.895  50.690  1.00 21.37      1SG 
ATOM    752  O   ARG    48      28.445  39.644  49.727  1.00 23.51      1SG 
ATOM    753  N   ALA    49      29.558  41.129  50.999  1.00 22.29      1SG 
ATOM    754  HN  ALA    49      30.086  41.327  51.821  1.00   .00      1SG 
ATOM    755  CA  ALA    49      29.240  42.275  50.144  1.00 26.79      1SG 
ATOM    756  HA  ALA    49      29.023  41.902  49.154  1.00   .00      1SG 
ATOM    757  CB  ALA    49      28.036  43.053  50.694  1.00 28.98      1SG 
ATOM    758  HB1 ALA    49      28.259  43.429  51.716  1.00   .00      1SG 
ATOM    759  HB2 ALA    49      27.148  42.388  50.746  1.00   .00      1SG 
ATOM    760  HB3 ALA    49      27.815  43.921  50.037  1.00   .00      1SG 
ATOM    761  C   ALA    49      30.494  43.150  50.134  1.00 25.27      1SG 
ATOM    762  O   ALA    49      31.191  43.267  51.139  1.00 25.12      1SG 
ATOM    763  N   PRO    50      30.801  43.781  48.994  1.00 28.34      1SG 
ATOM    764  CD  PRO    50      30.190  43.707  47.660  1.00 29.69      1SG 
ATOM    765  HD1 PRO    50      29.084  43.664  47.739  1.00   .00      1SG 
ATOM    766  HD2 PRO    50      30.567  42.822  47.107  1.00   .00      1SG 
ATOM    767  CA  PRO    50      32.006  44.615  48.973  1.00 29.50      1SG 
ATOM    768  HA  PRO    50      32.856  44.057  49.331  1.00   .00      1SG 
ATOM    769  CB  PRO    50      32.103  45.061  47.504  1.00 30.22      1SG 
ATOM    770  HB1 PRO    50      32.739  44.367  46.914  1.00   .00      1SG 
ATOM    771  HB2 PRO    50      32.519  46.088  47.422  1.00   .00      1SG 
ATOM    772  CG  PRO    50      30.669  45.014  47.042  1.00 36.00      1SG 
ATOM    773  HG1 PRO    50      30.089  45.882  47.422  1.00   .00      1SG 
ATOM    774  HG2 PRO    50      30.598  44.991  45.934  1.00   .00      1SG 
ATOM    775  C   PRO    50      31.989  45.781  49.935  1.00 27.76      1SG 
ATOM    776  O   PRO    50      33.007  46.120  50.519  1.00 29.73      1SG 
ATOM    777  N   TRP    51      30.835  46.390  50.135  1.00 26.88      1SG 
ATOM    778  HN  TRP    51      29.976  46.102  49.719  1.00   .00      1SG 
ATOM    779  CA  TRP    51      30.809  47.547  51.011  1.00 26.37      1SG 
ATOM    780  HA  TRP    51      31.671  48.158  50.789  1.00   .00      1SG 
ATOM    781  CB  TRP    51      29.525  48.336  50.791  1.00 28.96      1SG 
ATOM    782  HB1 TRP    51      29.609  48.909  49.843  1.00   .00      1SG 
ATOM    783  HB2 TRP    51      29.386  49.045  51.635  1.00   .00      1SG 
ATOM    784  CG  TRP    51      28.333  47.459  50.709  1.00 29.16      1SG 
ATOM    785  CD1 TRP    51      27.793  46.905  49.587  1.00 29.82      1SG 
ATOM    786  HD1 TRP    51      28.181  47.029  48.587  1.00   .00      1SG 
ATOM    787  NE1 TRP    51      26.677  46.162  49.917  1.00 27.33      1SG 
ATOM    788  HE1 TRP    51      26.113  45.671  49.289  1.00   .00      1SG 
ATOM    789  CE2 TRP    51      26.494  46.229  51.271  1.00 25.75      1SG 
ATOM    790  CD2 TRP    51      27.525  47.040  51.799  1.00 24.40      1SG 
ATOM    791  CE3 TRP    51      27.564  47.275  53.172  1.00 25.06      1SG 
ATOM    792  HE3 TRP    51      28.333  47.886  53.621  1.00   .00      1SG 
ATOM    793  CZ3 TRP    51      26.584  46.703  53.973  1.00 21.62      1SG 
ATOM    794  HZ3 TRP    51      26.600  46.878  55.039  1.00   .00      1SG 
ATOM    795  CZ2 TRP    51      25.506  45.650  52.073  1.00 22.31      1SG 
ATOM    796  HZ2 TRP    51      24.720  45.032  51.665  1.00   .00      1SG 
ATOM    797  CH2 TRP    51      25.564  45.894  53.416  1.00 18.59      1SG 
ATOM    798  HH2 TRP    51      24.817  45.461  54.065  1.00   .00      1SG 
ATOM    799  C   TRP    51      30.997  47.275  52.494  1.00 27.85      1SG 
ATOM    800  O   TRP    51      31.249  48.210  53.252  1.00 29.12      1SG 
ATOM    801  N   ILE    52      30.882  46.022  52.927  1.00 24.98      1SG 
ATOM    802  HN  ILE    52      30.668  45.255  52.328  1.00   .00      1SG 
ATOM    803  CA  ILE    52      31.074  45.729  54.345  1.00 24.39      1SG 
ATOM    804  HA  ILE    52      30.822  46.619  54.903  1.00   .00      1SG 
ATOM    805  CB  ILE    52      30.187  44.538  54.811  1.00 25.61      1SG 
ATOM    806  HB  ILE    52      29.157  44.670  54.417  1.00   .00      1SG 
ATOM    807  CG2 ILE    52      30.759  43.207  54.302  1.00 20.23      1SG 
ATOM    808 HG21 ILE    52      31.600  42.880  54.950  1.00   .00      1SG 
ATOM    809 HG22 ILE    52      31.137  43.330  53.265  1.00   .00      1SG 
ATOM    810 HG23 ILE    52      29.971  42.424  54.322  1.00   .00      1SG 
ATOM    811  CG1 ILE    52      30.139  44.518  56.343  1.00 23.53      1SG 
ATOM    812 HG11 ILE    52      31.172  44.646  56.731  1.00   .00      1SG 
ATOM    813 HG12 ILE    52      29.751  43.531  56.672  1.00   .00      1SG 
ATOM    814  CD  ILE    52      29.255  45.613  56.939  1.00 19.02      1SG 
ATOM    815  HD1 ILE    52      28.210  45.499  56.578  1.00   .00      1SG 
ATOM    816  HD2 ILE    52      29.630  46.612  56.630  1.00   .00      1SG 
ATOM    817  HD3 ILE    52      29.257  45.539  58.048  1.00   .00      1SG 
ATOM    818  C   ILE    52      32.554  45.395  54.626  1.00 21.80      1SG 
ATOM    819  O   ILE    52      33.019  45.446  55.771  1.00 20.26      1SG 
ATOM    820  N   GLU    53      33.304  45.084  53.572  1.00 21.60      1SG 
ATOM    821  HN  GLU    53      32.945  45.069  52.642  1.00   .00      1SG 
ATOM    822  CA  GLU    53      34.712  44.745  53.736  1.00 26.80      1SG 
ATOM    823  HA  GLU    53      34.784  43.951  54.465  1.00   .00      1SG 
ATOM    824  CB  GLU    53      35.303  44.304  52.416  1.00 31.59      1SG 
ATOM    825  HB1 GLU    53      36.403  44.200  52.533  1.00   .00      1SG 
ATOM    826  HB2 GLU    53      35.095  45.083  51.653  1.00   .00      1SG 
ATOM    827  CG  GLU    53      34.749  43.012  51.943  1.00 34.70      1SG 
ATOM    828  HG1 GLU    53      33.644  43.090  51.858  1.00   .00      1SG 
ATOM    829  HG2 GLU    53      35.003  42.211  52.670  1.00   .00      1SG 
ATOM    830  CD  GLU    53      35.314  42.661  50.617  1.00 44.26      1SG 
ATOM    831  OE1 GLU    53      36.480  42.217  50.584  1.00 48.01      1SG 
ATOM    832  OE2 GLU    53      34.601  42.855  49.613  1.00 48.99      1SG 
ATOM    833  C   GLU    53      35.554  45.866  54.310  1.00 27.45      1SG 
ATOM    834  O   GLU    53      36.601  45.621  54.917  1.00 35.23      1SG 
ATOM    835  N   GLN    54      35.119  47.094  54.099  1.00 26.94      1SG 
ATOM    836  HN  GLN    54      34.297  47.294  53.572  1.00   .00      1SG 
ATOM    837  CA  GLN    54      35.847  48.237  54.645  1.00 33.64      1SG 
ATOM    838  HA  GLN    54      36.894  48.109  54.413  1.00   .00      1SG 
ATOM    839  CB  GLN    54      35.326  49.536  54.045  1.00 36.59      1SG 
ATOM    840  HB1 GLN    54      35.662  49.599  52.988  1.00   .00      1SG 
ATOM    841  HB2 GLN    54      35.759  50.388  54.611  1.00   .00      1SG 
ATOM    842  CG  GLN    54      33.829  49.647  54.081  1.00 42.28      1SG 
ATOM    843  HG1 GLN    54      33.472  49.408  55.105  1.00   .00      1SG 
ATOM    844  HG2 GLN    54      33.393  48.919  53.364  1.00   .00      1SG 
ATOM    845  CD  GLN    54      33.352  51.028  53.715  1.00 47.99      1SG 
ATOM    846  OE1 GLN    54      33.658  52.006  54.409  1.00 54.04      1SG 
ATOM    847  NE2 GLN    54      32.596  51.127  52.626  1.00 44.21      1SG 
ATOM    848 HE21 GLN    54      32.251  52.020  52.336  1.00   .00      1SG 
ATOM    849 HE22 GLN    54      32.372  50.309  52.097  1.00   .00      1SG 
ATOM    850  C   GLN    54      35.767  48.323  56.168  1.00 33.40      1SG 
ATOM    851  O   GLN    54      36.579  49.023  56.785  1.00 29.71      1SG 
ATOM    852  N   GLU    55      34.797  47.646  56.792  1.00 26.61      1SG 
ATOM    853  HN  GLU    55      34.112  47.102  56.314  1.00   .00      1SG 
ATOM    854  CA  GLU    55      34.721  47.694  58.256  1.00 26.26      1SG 
ATOM    855  HA  GLU    55      34.609  48.728  58.548  1.00   .00      1SG 
ATOM    856  CB  GLU    55      33.547  46.870  58.781  1.00 24.26      1SG 
ATOM    857  HB1 GLU    55      33.581  46.878  59.891  1.00   .00      1SG 
ATOM    858  HB2 GLU    55      33.665  45.825  58.425  1.00   .00      1SG 
ATOM    859  CG  GLU    55      32.177  47.379  58.337  1.00 21.94      1SG 
ATOM    860  HG1 GLU    55      31.394  46.709  58.752  1.00   .00      1SG 
ATOM    861  HG2 GLU    55      32.128  47.355  57.228  1.00   .00      1SG 
ATOM    862  CD  GLU    55      31.882  48.821  58.806  1.00 27.58      1SG 
ATOM    863  OE1 GLU    55      32.526  49.302  59.772  1.00 32.30      1SG 
ATOM    864  OE2 GLU    55      30.992  49.464  58.215  1.00 29.06      1SG 
ATOM    865  C   GLU    55      36.027  47.128  58.815  1.00 24.18      1SG 
ATOM    866  O   GLU    55      36.596  46.175  58.265  1.00 22.67      1SG 
ATOM    867  N   GLY    56      36.478  47.712  59.919  1.00 24.28      1SG 
ATOM    868  HN  GLY    56      35.981  48.449  60.369  1.00   .00      1SG 
ATOM    869  CA  GLY    56      37.725  47.312  60.539  1.00 27.02      1SG 
ATOM    870  HA1 GLY    56      38.059  48.150  61.132  1.00   .00      1SG 
ATOM    871  HA2 GLY    56      38.422  47.120  59.738  1.00   .00      1SG 
ATOM    872  C   GLY    56      37.696  46.088  61.435  1.00 28.17      1SG 
ATOM    873  O   GLY    56      36.637  45.506  61.695  1.00 23.86      1SG 
ATOM    874  N   PRO    57      38.864  45.690  61.951  1.00 28.67      1SG 
ATOM    875  CD  PRO    57      40.169  46.366  61.813  1.00 32.01      1SG 
ATOM    876  HD1 PRO    57      40.033  47.467  61.770  1.00   .00      1SG 
ATOM    877  HD2 PRO    57      40.694  46.012  60.902  1.00   .00      1SG 
ATOM    878  CA  PRO    57      38.980  44.526  62.816  1.00 30.30      1SG 
ATOM    879  HA  PRO    57      38.602  43.647  62.319  1.00   .00      1SG 
ATOM    880  CB  PRO    57      40.476  44.488  63.140  1.00 33.79      1SG 
ATOM    881  HB1 PRO    57      41.034  43.880  62.397  1.00   .00      1SG 
ATOM    882  HB2 PRO    57      40.658  44.072  64.154  1.00   .00      1SG 
ATOM    883  CG  PRO    57      40.873  45.938  63.066  1.00 31.00      1SG 
ATOM    884  HG1 PRO    57      40.517  46.506  63.951  1.00   .00      1SG 
ATOM    885  HG2 PRO    57      41.973  46.058  62.980  1.00   .00      1SG 
ATOM    886  C   PRO    57      38.103  44.571  64.053  1.00 30.27      1SG 
ATOM    887  O   PRO    57      37.698  43.537  64.542  1.00 28.47      1SG 
ATOM    888  N   GLU    58      37.806  45.762  64.558  1.00 29.93      1SG 
ATOM    889  HN  GLU    58      38.126  46.618  64.158  1.00   .00      1SG 
ATOM    890  CA  GLU    58      36.974  45.857  65.755  1.00 32.52      1SG 
ATOM    891  HA  GLU    58      37.403  45.223  66.517  1.00   .00      1SG 
ATOM    892  CB  GLU    58      36.919  47.307  66.233  1.00 38.57      1SG 
ATOM    893  HB1 GLU    58      36.373  47.338  67.199  1.00   .00      1SG 
ATOM    894  HB2 GLU    58      36.358  47.903  65.483  1.00   .00      1SG 
ATOM    895  CG  GLU    58      38.301  47.953  66.434  1.00 53.19      1SG 
ATOM    896  HG1 GLU    58      38.168  49.048  66.564  1.00   .00      1SG 
ATOM    897  HG2 GLU    58      38.918  47.765  65.530  1.00   .00      1SG 
ATOM    898  CD  GLU    58      39.057  47.414  67.651  1.00 59.64      1SG 
ATOM    899  OE1 GLU    58      38.633  47.698  68.793  1.00 64.87      1SG 
ATOM    900  OE2 GLU    58      40.077  46.707  67.467  1.00 65.62      1SG 
ATOM    901  C   GLU    58      35.568  45.366  65.397  1.00 30.23      1SG 
ATOM    902  O   GLU    58      34.902  44.665  66.180  1.00 24.84      1SG 
ATOM    903  N   TYR    59      35.126  45.734  64.201  1.00 23.71      1SG 
ATOM    904  HN  TYR    59      35.664  46.292  63.574  1.00   .00      1SG 
ATOM    905  CA  TYR    59      33.801  45.325  63.748  1.00 22.75      1SG 
ATOM    906  HA  TYR    59      33.081  45.638  64.489  1.00   .00      1SG 
ATOM    907  CB  TYR    59      33.485  45.961  62.397  1.00 22.05      1SG 
ATOM    908  HB1 TYR    59      34.281  45.691  61.671  1.00   .00      1SG 
ATOM    909  HB2 TYR    59      33.435  47.064  62.516  1.00   .00      1SG 
ATOM    910  CG  TYR    59      32.168  45.517  61.800  1.00 24.61      1SG 
ATOM    911  CD1 TYR    59      30.972  46.147  62.154  1.00 22.71      1SG 
ATOM    912  HD1 TYR    59      30.987  46.957  62.868  1.00   .00      1SG 
ATOM    913  CE1 TYR    59      29.740  45.736  61.587  1.00 23.79      1SG 
ATOM    914  HE1 TYR    59      28.822  46.233  61.864  1.00   .00      1SG 
ATOM    915  CZ  TYR    59      29.719  44.692  60.674  1.00 18.91      1SG 
ATOM    916  OH  TYR    59      28.512  44.244  60.167  1.00 21.18      1SG 
ATOM    917  HH  TYR    59      28.691  43.768  59.353  1.00   .00      1SG 
ATOM    918  CD2 TYR    59      32.121  44.467  60.878  1.00 23.17      1SG 
ATOM    919  HD2 TYR    59      33.036  43.966  60.600  1.00   .00      1SG 
ATOM    920  CE2 TYR    59      30.908  44.050  60.305  1.00 20.20      1SG 
ATOM    921  HE2 TYR    59      30.892  43.243  59.588  1.00   .00      1SG 
ATOM    922  C   TYR    59      33.761  43.812  63.626  1.00 21.33      1SG 
ATOM    923  O   TYR    59      32.891  43.163  64.193  1.00 21.70      1SG 
ATOM    924  N   TRP    60      34.721  43.243  62.906  1.00 20.42      1SG 
ATOM    925  HN  TRP    60      35.466  43.755  62.485  1.00   .00      1SG 
ATOM    926  CA  TRP    60      34.707  41.812  62.708  1.00 19.60      1SG 
ATOM    927  HA  TRP    60      33.713  41.523  62.402  1.00   .00      1SG 
ATOM    928  CB  TRP    60      35.734  41.422  61.636  1.00 20.74      1SG 
ATOM    929  HB1 TRP    60      35.747  40.318  61.517  1.00   .00      1SG 
ATOM    930  HB2 TRP    60      36.744  41.767  61.944  1.00   .00      1SG 
ATOM    931  CG  TRP    60      35.377  42.055  60.323  1.00 21.32      1SG 
ATOM    932  CD1 TRP    60      35.978  43.150  59.731  1.00 21.07      1SG 
ATOM    933  HD1 TRP    60      36.852  43.659  60.110  1.00   .00      1SG 
ATOM    934  NE1 TRP    60      35.294  43.495  58.582  1.00 20.01      1SG 
ATOM    935  HE1 TRP    60      35.524  44.231  57.984  1.00   .00      1SG 
ATOM    936  CE2 TRP    60      34.235  42.632  58.418  1.00 19.34      1SG 
ATOM    937  CD2 TRP    60      34.266  41.708  59.494  1.00 17.07      1SG 
ATOM    938  CE3 TRP    60      33.289  40.700  59.553  1.00 20.86      1SG 
ATOM    939  HE3 TRP    60      33.270  39.976  60.354  1.00   .00      1SG 
ATOM    940  CZ3 TRP    60      32.312  40.641  58.535  1.00 16.62      1SG 
ATOM    941  HZ3 TRP    60      31.560  39.866  58.562  1.00   .00      1SG 
ATOM    942  CZ2 TRP    60      33.252  42.582  57.403  1.00 19.13      1SG 
ATOM    943  HZ2 TRP    60      33.229  43.292  56.590  1.00   .00      1SG 
ATOM    944  CH2 TRP    60      32.305  41.586  57.477  1.00 21.70      1SG 
ATOM    945  HH2 TRP    60      31.542  41.523  56.715  1.00   .00      1SG 
ATOM    946  C   TRP    60      34.891  41.034  64.000  1.00 20.99      1SG 
ATOM    947  O   TRP    60      34.235  40.010  64.206  1.00 17.86      1SG 
ATOM    948  N   ASP    61      35.746  41.519  64.900  1.00 20.18      1SG 
ATOM    949  HN  ASP    61      36.283  42.346  64.753  1.00   .00      1SG 
ATOM    950  CA  ASP    61      35.925  40.823  66.176  1.00 21.75      1SG 
ATOM    951  HA  ASP    61      36.176  39.795  65.960  1.00   .00      1SG 
ATOM    952  CB  ASP    61      37.031  41.472  67.014  1.00 26.59      1SG 
ATOM    953  HB1 ASP    61      36.937  41.125  68.065  1.00   .00      1SG 
ATOM    954  HB2 ASP    61      36.907  42.575  66.981  1.00   .00      1SG 
ATOM    955  CG  ASP    61      38.420  41.130  66.518  1.00 34.51      1SG 
ATOM    956  OD1 ASP    61      38.555  40.322  65.571  1.00 29.07      1SG 
ATOM    957  OD2 ASP    61      39.384  41.676  67.096  1.00 33.66      1SG 
ATOM    958  C   ASP    61      34.630  40.874  66.972  1.00 16.51      1SG 
ATOM    959  O   ASP    61      34.214  39.877  67.566  1.00 20.66      1SG 
ATOM    960  N   GLY    62      34.006  42.050  66.995  1.00 18.46      1SG 
ATOM    961  HN  GLY    62      34.365  42.855  66.530  1.00   .00      1SG 
ATOM    962  CA  GLY    62      32.753  42.222  67.709  1.00 22.72      1SG 
ATOM    963  HA1 GLY    62      32.464  43.260  67.632  1.00   .00      1SG 
ATOM    964  HA2 GLY    62      32.919  41.957  68.743  1.00   .00      1SG 
ATOM    965  C   GLY    62      31.643  41.352  67.143  1.00 20.88      1SG 
ATOM    966  O   GLY    62      30.907  40.676  67.905  1.00 19.93      1SG 
ATOM    967  N   GLU    63      31.527  41.334  65.820  1.00 16.85      1SG 
ATOM    968  HN  GLU    63      32.126  41.852  65.215  1.00   .00      1SG 
ATOM    969  CA  GLU    63      30.474  40.521  65.185  1.00 16.25      1SG 
ATOM    970  HA  GLU    63      29.538  40.750  65.672  1.00   .00      1SG 
ATOM    971  CB  GLU    63      30.378  40.820  63.681  1.00 17.96      1SG 
ATOM    972  HB1 GLU    63      29.663  40.107  63.218  1.00   .00      1SG 
ATOM    973  HB2 GLU    63      31.379  40.674  63.222  1.00   .00      1SG 
ATOM    974  CG  GLU    63      29.903  42.258  63.394  1.00 21.09      1SG 
ATOM    975  HG1 GLU    63      29.672  42.356  62.312  1.00   .00      1SG 
ATOM    976  HG2 GLU    63      30.714  42.969  63.660  1.00   .00      1SG 
ATOM    977  CD  GLU    63      28.652  42.621  64.196  1.00 21.29      1SG 
ATOM    978  OE1 GLU    63      27.555  42.081  63.905  1.00 19.99      1SG 
ATOM    979  OE2 GLU    63      28.770  43.444  65.135  1.00 25.85      1SG 
ATOM    980  C   GLU    63      30.686  39.035  65.413  1.00 17.25      1SG 
ATOM    981  O   GLU    63      29.729  38.288  65.608  1.00 17.40      1SG 
ATOM    982  N   THR    64      31.938  38.600  65.365  1.00 15.56      1SG 
ATOM    983  HN  THR    64      32.697  39.211  65.157  1.00   .00      1SG 
ATOM    984  CA  THR    64      32.293  37.222  65.608  1.00 15.83      1SG 
ATOM    985  HA  THR    64      31.692  36.602  64.959  1.00   .00      1SG 
ATOM    986  CB  THR    64      33.780  36.995  65.333  1.00 18.18      1SG 
ATOM    987  HB  THR    64      34.393  37.725  65.904  1.00   .00      1SG 
ATOM    988  OG1 THR    64      34.008  37.179  63.930  1.00 19.05      1SG 
ATOM    989  HG1 THR    64      34.056  38.128  63.792  1.00   .00      1SG 
ATOM    990  CG2 THR    64      34.205  35.573  65.742  1.00 20.07      1SG 
ATOM    991 HG21 THR    64      33.507  34.826  65.307  1.00   .00      1SG 
ATOM    992 HG22 THR    64      34.184  35.476  66.849  1.00   .00      1SG 
ATOM    993 HG23 THR    64      35.229  35.362  65.367  1.00   .00      1SG 
ATOM    994  C   THR    64      31.991  36.853  67.049  1.00 19.04      1SG 
ATOM    995  O   THR    64      31.454  35.777  67.303  1.00 17.56      1SG 
ATOM    996  N   ARG    65      32.360  37.711  68.007  1.00 16.43      1SG 
ATOM    997  HN  ARG    65      32.864  38.550  67.818  1.00   .00      1SG 
ATOM    998  CA  ARG    65      32.024  37.437  69.414  1.00 18.72      1SG 
ATOM    999  HA  ARG    65      32.486  36.501  69.693  1.00   .00      1SG 
ATOM   1000  CB  ARG    65      32.527  38.571  70.319  1.00 21.27      1SG 
ATOM   1001  HB1 ARG    65      32.219  39.539  69.871  1.00   .00      1SG 
ATOM   1002  HB2 ARG    65      33.636  38.526  70.352  1.00   .00      1SG 
ATOM   1003  CG  ARG    65      31.995  38.515  71.766  1.00 32.76      1SG 
ATOM   1004  HG1 ARG    65      32.295  37.551  72.230  1.00   .00      1SG 
ATOM   1005  HG2 ARG    65      30.886  38.577  71.752  1.00   .00      1SG 
ATOM   1006  CD  ARG    65      32.557  39.676  72.599  1.00 36.15      1SG 
ATOM   1007  HD1 ARG    65      33.657  39.563  72.710  1.00   .00      1SG 
ATOM   1008  HD2 ARG    65      32.072  39.693  73.598  1.00   .00      1SG 
ATOM   1009  NE  ARG    65      32.300  40.965  71.952  1.00 47.47      1SG 
ATOM   1010  HE  ARG    65      33.061  41.409  71.481  1.00   .00      1SG 
ATOM   1011  CZ  ARG    65      31.122  41.587  71.948  1.00 48.98      1SG 
ATOM   1012  NH1 ARG    65      30.080  41.047  72.571  1.00 47.67      1SG 
ATOM   1013 HH11 ARG    65      30.179  40.172  73.044  1.00   .00      1SG 
ATOM   1014 HH12 ARG    65      29.197  41.516  72.567  1.00   .00      1SG 
ATOM   1015  NH2 ARG    65      30.982  42.740  71.298  1.00 47.41      1SG 
ATOM   1016 HH21 ARG    65      31.761  43.138  70.813  1.00   .00      1SG 
ATOM   1017 HH22 ARG    65      30.098  43.208  71.294  1.00   .00      1SG 
ATOM   1018  C   ARG    65      30.490  37.316  69.597  1.00 16.82      1SG 
ATOM   1019  O   ARG    65      29.984  36.399  70.267  1.00 17.36      1SG 
ATOM   1020  N   LYS    66      29.732  38.216  68.988  1.00 15.80      1SG 
ATOM   1021  HN  LYS    66      30.091  38.939  68.403  1.00   .00      1SG 
ATOM   1022  CA  LYS    66      28.283  38.151  69.182  1.00 16.36      1SG 
ATOM   1023  HA  LYS    66      28.092  37.966  70.229  1.00   .00      1SG 
ATOM   1024  CB  LYS    66      27.627  39.463  68.744  1.00 18.56      1SG 
ATOM   1025  HB1 LYS    66      26.530  39.305  68.678  1.00   .00      1SG 
ATOM   1026  HB2 LYS    66      28.013  39.733  67.738  1.00   .00      1SG 
ATOM   1027  CG  LYS    66      27.896  40.639  69.705  1.00 19.53      1SG 
ATOM   1028  HG1 LYS    66      28.990  40.827  69.752  1.00   .00      1SG 
ATOM   1029  HG2 LYS    66      27.534  40.369  70.720  1.00   .00      1SG 
ATOM   1030  CD  LYS    66      27.190  41.914  69.246  1.00 25.98      1SG 
ATOM   1031  HD1 LYS    66      27.244  42.677  70.051  1.00   .00      1SG 
ATOM   1032  HD2 LYS    66      26.123  41.690  69.034  1.00   .00      1SG 
ATOM   1033  CE  LYS    66      27.852  42.455  67.991  1.00 25.14      1SG 
ATOM   1034  HE1 LYS    66      27.714  41.732  67.159  1.00   .00      1SG 
ATOM   1035  HE2 LYS    66      28.935  42.613  68.183  1.00   .00      1SG 
ATOM   1036  NZ  LYS    66      27.284  43.755  67.549  1.00 20.95      1SG 
ATOM   1037  HZ1 LYS    66      27.556  44.499  68.222  1.00   .00      1SG 
ATOM   1038  HZ2 LYS    66      26.247  43.685  67.510  1.00   .00      1SG 
ATOM   1039  HZ3 LYS    66      27.651  43.991  66.605  1.00   .00      1SG 
ATOM   1040  C   LYS    66      27.619  36.977  68.458  1.00 15.22      1SG 
ATOM   1041  O   LYS    66      26.667  36.393  68.983  1.00 16.34      1SG 
ATOM   1042  N   VAL    67      28.116  36.620  67.270  1.00 14.06      1SG 
ATOM   1043  HN  VAL    67      28.906  37.053  66.843  1.00   .00      1SG 
ATOM   1044  CA  VAL    67      27.468  35.538  66.560  1.00 16.80      1SG 
ATOM   1045  HA  VAL    67      26.401  35.667  66.665  1.00   .00      1SG 
ATOM   1046  CB  VAL    67      27.858  35.524  65.053  1.00 14.47      1SG 
ATOM   1047  HB  VAL    67      27.913  36.568  64.678  1.00   .00      1SG 
ATOM   1048  CG1 VAL    67      29.202  34.848  64.854  1.00 16.35      1SG 
ATOM   1049 HG11 VAL    67      29.113  33.757  65.047  1.00   .00      1SG 
ATOM   1050 HG12 VAL    67      29.947  35.273  65.559  1.00   .00      1SG 
ATOM   1051 HG13 VAL    67      29.549  34.996  63.809  1.00   .00      1SG 
ATOM   1052  CG2 VAL    67      26.756  34.829  64.261  1.00 15.86      1SG 
ATOM   1053 HG21 VAL    67      25.766  35.257  64.527  1.00   .00      1SG 
ATOM   1054 HG22 VAL    67      26.748  33.743  64.497  1.00   .00      1SG 
ATOM   1055 HG23 VAL    67      26.924  34.974  63.172  1.00   .00      1SG 
ATOM   1056  C   VAL    67      27.758  34.227  67.264  1.00 15.35      1SG 
ATOM   1057  O   VAL    67      26.914  33.306  67.289  1.00 14.69      1SG 
ATOM   1058  N   LYS    68      28.932  34.132  67.880  1.00 16.68      1SG 
ATOM   1059  HN  LYS    68      29.621  34.852  67.856  1.00   .00      1SG 
ATOM   1060  CA  LYS    68      29.254  32.923  68.637  1.00 18.11      1SG 
ATOM   1061  HA  LYS    68      29.039  32.068  68.013  1.00   .00      1SG 
ATOM   1062  CB  LYS    68      30.720  32.931  69.040  1.00 17.92      1SG 
ATOM   1063  HB1 LYS    68      30.871  32.199  69.862  1.00   .00      1SG 
ATOM   1064  HB2 LYS    68      30.986  33.945  69.408  1.00   .00      1SG 
ATOM   1065  CG  LYS    68      31.656  32.564  67.866  1.00 23.05      1SG 
ATOM   1066  HG1 LYS    68      31.438  33.216  66.993  1.00   .00      1SG 
ATOM   1067  HG2 LYS    68      31.494  31.505  67.572  1.00   .00      1SG 
ATOM   1068  CD  LYS    68      33.104  32.762  68.312  1.00 31.50      1SG 
ATOM   1069  HD1 LYS    68      33.235  32.293  69.310  1.00   .00      1SG 
ATOM   1070  HD2 LYS    68      33.303  33.851  68.398  1.00   .00      1SG 
ATOM   1071  CE  LYS    68      34.108  32.163  67.363  1.00 32.35      1SG 
ATOM   1072  HE1 LYS    68      34.085  32.687  66.384  1.00   .00      1SG 
ATOM   1073  HE2 LYS    68      33.917  31.078  67.221  1.00   .00      1SG 
ATOM   1074  NZ  LYS    68      35.463  32.339  67.974  1.00 35.40      1SG 
ATOM   1075  HZ1 LYS    68      35.495  31.852  68.893  1.00   .00      1SG 
ATOM   1076  HZ2 LYS    68      35.652  33.352  68.112  1.00   .00      1SG 
ATOM   1077  HZ3 LYS    68      36.183  31.935  67.342  1.00   .00      1SG 
ATOM   1078  C   LYS    68      28.371  32.831  69.881  1.00 17.89      1SG 
ATOM   1079  O   LYS    68      27.958  31.737  70.303  1.00 18.59      1SG 
ATOM   1080  N   ALA    69      28.082  33.978  70.477  1.00 18.12      1SG 
ATOM   1081  HN  ALA    69      28.428  34.857  70.158  1.00   .00      1SG 
ATOM   1082  CA  ALA    69      27.224  33.996  71.653  1.00 20.02      1SG 
ATOM   1083  HA  ALA    69      27.636  33.313  72.381  1.00   .00      1SG 
ATOM   1084  CB  ALA    69      27.151  35.403  72.227  1.00 20.21      1SG 
ATOM   1085  HB1 ALA    69      26.736  36.103  71.470  1.00   .00      1SG 
ATOM   1086  HB2 ALA    69      28.168  35.749  72.511  1.00   .00      1SG 
ATOM   1087  HB3 ALA    69      26.490  35.413  73.120  1.00   .00      1SG 
ATOM   1088  C   ALA    69      25.828  33.533  71.222  1.00 15.26      1SG 
ATOM   1089  O   ALA    69      25.149  32.805  71.957  1.00 15.54      1SG 
ATOM   1090  N   HSE    70      25.391  33.995  70.053  1.00 14.33      1SG 
ATOM   1091  HN  HSE    70      25.926  34.617  69.487  1.00   .00      1SG 
ATOM   1092  CA  HSE    70      24.069  33.600  69.533  1.00 15.58      1SG 
ATOM   1093  HA  HSE    70      23.321  33.919  70.243  1.00   .00      1SG 
ATOM   1094  CB  HSE    70      23.812  34.242  68.165  1.00 16.18      1SG 
ATOM   1095  HB1 HSE    70      23.070  33.621  67.620  1.00   .00      1SG 
ATOM   1096  HB2 HSE    70      24.767  34.253  67.598  1.00   .00      1SG 
ATOM   1097  ND1 HSE    70      23.936  36.670  68.880  1.00 19.01      1SG 
ATOM   1098  CG  HSE    70      23.288  35.649  68.216  1.00 18.81      1SG 
ATOM   1099  CE1 HSE    70      23.306  37.810  68.649  1.00 20.55      1SG 
ATOM   1100  HE1 HSE    70      23.575  38.795  69.027  1.00   .00      1SG 
ATOM   1101  NE2 HSE    70      22.269  37.567  67.866  1.00 17.95      1SG 
ATOM   1102  HE2 HSE    70      21.612  38.240  67.525  1.00   .00      1SG 
ATOM   1103  CD2 HSE    70      22.232  36.220  67.587  1.00 17.86      1SG 
ATOM   1104  HD2 HSE    70      21.470  35.761  66.969  1.00   .00      1SG 
ATOM   1105  C   HSE    70      24.070  32.086  69.359  1.00 18.44      1SG 
ATOM   1106  O   HSE    70      23.101  31.386  69.712  1.00 14.51      1SG 
ATOM   1107  N   SER    71      25.172  31.581  68.808  1.00 14.78      1SG 
ATOM   1108  HN  SER    71      25.948  32.149  68.545  1.00   .00      1SG 
ATOM   1109  CA  SER    71      25.299  30.162  68.560  1.00 14.69      1SG 
ATOM   1110  HA  SER    71      24.511  29.865  67.885  1.00   .00      1SG 
ATOM   1111  CB  SER    71      26.664  29.862  67.952  1.00 18.61      1SG 
ATOM   1112  HB1 SER    71      27.461  30.354  68.549  1.00   .00      1SG 
ATOM   1113  HB2 SER    71      26.703  30.234  66.906  1.00   .00      1SG 
ATOM   1114  OG  SER    71      26.882  28.474  67.953  1.00 24.19      1SG 
ATOM   1115  HG1 SER    71      26.176  28.095  67.424  1.00   .00      1SG 
ATOM   1116  C   SER    71      25.147  29.368  69.839  1.00 15.02      1SG 
ATOM   1117  O   SER    71      24.466  28.328  69.873  1.00 16.15      1SG 
ATOM   1118  N   GLN    72      25.827  29.837  70.879  1.00 14.19      1SG 
ATOM   1119  HN  GLN    72      26.385  30.661  70.817  1.00   .00      1SG 
ATOM   1120  CA  GLN    72      25.802  29.181  72.173  1.00 16.50      1SG 
ATOM   1121  HA  GLN    72      26.106  28.154  72.034  1.00   .00      1SG 
ATOM   1122  CB  GLN    72      26.740  29.884  73.149  1.00 19.18      1SG 
ATOM   1123  HB1 GLN    72      26.400  30.933  73.279  1.00   .00      1SG 
ATOM   1124  HB2 GLN    72      27.765  29.888  72.721  1.00   .00      1SG 
ATOM   1125  CG  GLN    72      26.780  29.210  74.508  1.00 31.17      1SG 
ATOM   1126  HG1 GLN    72      25.808  29.364  75.022  1.00   .00      1SG 
ATOM   1127  HG2 GLN    72      27.591  29.663  75.118  1.00   .00      1SG 
ATOM   1128  CD  GLN    72      27.038  27.708  74.383  1.00 43.27      1SG 
ATOM   1129  OE1 GLN    72      28.003  27.277  73.719  1.00 46.20      1SG 
ATOM   1130  NE2 GLN    72      26.168  26.898  75.004  1.00 37.89      1SG 
ATOM   1131 HE21 GLN    72      25.323  27.271  75.386  1.00   .00      1SG 
ATOM   1132 HE22 GLN    72      26.365  25.921  75.085  1.00   .00      1SG 
ATOM   1133  C   GLN    72      24.397  29.164  72.772  1.00 15.37      1SG 
ATOM   1134  O   GLN    72      23.979  28.164  73.354  1.00 16.26      1SG 
ATOM   1135  N   THR    73      23.685  30.270  72.631  1.00 13.98      1SG 
ATOM   1136  HN  THR    73      24.037  31.080  72.168  1.00   .00      1SG 
ATOM   1137  CA  THR    73      22.323  30.358  73.157  1.00 15.86      1SG 
ATOM   1138  HA  THR    73      22.348  30.105  74.206  1.00   .00      1SG 
ATOM   1139  CB  THR    73      21.773  31.800  72.957  1.00 19.36      1SG 
ATOM   1140  HB  THR    73      21.866  32.099  71.891  1.00   .00      1SG 
ATOM   1141  OG1 THR    73      22.537  32.705  73.769  1.00 20.20      1SG 
ATOM   1142  HG1 THR    73      23.348  32.876  73.284  1.00   .00      1SG 
ATOM   1143  CG2 THR    73      20.298  31.891  73.325  1.00 20.53      1SG 
ATOM   1144 HG21 THR    73      20.126  31.442  74.327  1.00   .00      1SG 
ATOM   1145 HG22 THR    73      19.687  31.339  72.579  1.00   .00      1SG 
ATOM   1146 HG23 THR    73      19.980  32.955  73.354  1.00   .00      1SG 
ATOM   1147  C   THR    73      21.425  29.339  72.441  1.00 14.74      1SG 
ATOM   1148  O   THR    73      20.624  28.634  73.078  1.00 15.30      1SG 
ATOM   1149  N   HSE    74      21.551  29.261  71.116  1.00 12.42      1SG 
ATOM   1150  HN  HSE    74      22.189  29.827  70.599  1.00   .00      1SG 
ATOM   1151  CA  HSE    74      20.740  28.321  70.354  1.00 13.25      1SG 
ATOM   1152  HA  HSE    74      19.713  28.433  70.667  1.00   .00      1SG 
ATOM   1153  CB  HSE    74      20.874  28.598  68.860  1.00 18.00      1SG 
ATOM   1154  HB1 HSE    74      20.588  27.685  68.296  1.00   .00      1SG 
ATOM   1155  HB2 HSE    74      21.931  28.852  68.633  1.00   .00      1SG 
ATOM   1156  ND1 HSE    74      20.471  31.019  68.265  1.00 32.37      1SG 
ATOM   1157  CG  HSE    74      20.005  29.729  68.406  1.00 23.21      1SG 
ATOM   1158  CE1 HSE    74      19.462  31.826  67.978  1.00 23.15      1SG 
ATOM   1159  HE1 HSE    74      19.508  32.901  67.811  1.00   .00      1SG 
ATOM   1160  NE2 HSE    74      18.361  31.108  67.924  1.00 24.92      1SG 
ATOM   1161  HE2 HSE    74      17.442  31.449  67.726  1.00   .00      1SG 
ATOM   1162  CD2 HSE    74      18.671  29.792  68.187  1.00 29.75      1SG 
ATOM   1163  HD2 HSE    74      17.935  28.998  68.201  1.00   .00      1SG 
ATOM   1164  C   HSE    74      21.098  26.881  70.694  1.00 14.34      1SG 
ATOM   1165  O   HSE    74      20.228  26.014  70.718  1.00 13.55      1SG 
ATOM   1166  N   ARG    75      22.370  26.627  70.995  1.00 13.55      1SG 
ATOM   1167  HN  ARG    75      23.082  27.325  70.996  1.00   .00      1SG 
ATOM   1168  CA  ARG    75      22.769  25.261  71.346  1.00 15.14      1SG 
ATOM   1169  HA  ARG    75      22.474  24.607  70.539  1.00   .00      1SG 
ATOM   1170  CB  ARG    75      24.286  25.185  71.567  1.00 16.12      1SG 
ATOM   1171  HB1 ARG    75      24.574  25.945  72.323  1.00   .00      1SG 
ATOM   1172  HB2 ARG    75      24.798  25.418  70.609  1.00   .00      1SG 
ATOM   1173  CG  ARG    75      24.751  23.814  72.049  1.00 25.43      1SG 
ATOM   1174  HG1 ARG    75      24.222  23.025  71.474  1.00   .00      1SG 
ATOM   1175  HG2 ARG    75      24.503  23.701  73.126  1.00   .00      1SG 
ATOM   1176  CD  ARG    75      26.270  23.650  71.858  1.00 33.86      1SG 
ATOM   1177  HD1 ARG    75      26.586  24.200  70.946  1.00   .00      1SG 
ATOM   1178  HD2 ARG    75      26.512  22.571  71.755  1.00   .00      1SG 
ATOM   1179  NE  ARG    75      27.062  24.166  72.970  1.00 44.61      1SG 
ATOM   1180  HE  ARG    75      26.576  24.527  73.765  1.00   .00      1SG 
ATOM   1181  CZ  ARG    75      28.397  24.184  72.988  1.00 50.00      1SG 
ATOM   1182  NH1 ARG    75      29.082  23.721  71.947  1.00 51.53      1SG 
ATOM   1183 HH11 ARG    75      30.035  23.993  71.815  1.00   .00      1SG 
ATOM   1184 HH12 ARG    75      28.644  23.100  71.296  1.00   .00      1SG 
ATOM   1185  NH2 ARG    75      29.054  24.645  74.049  1.00 48.02      1SG 
ATOM   1186 HH21 ARG    75      30.044  24.519  74.118  1.00   .00      1SG 
ATOM   1187 HH22 ARG    75      28.558  25.118  74.777  1.00   .00      1SG 
ATOM   1188  C   ARG    75      22.008  24.842  72.619  1.00 16.52      1SG 
ATOM   1189  O   ARG    75      21.488  23.735  72.710  1.00 15.27      1SG 
ATOM   1190  N   VAL    76      21.942  25.736  73.594  1.00 13.42      1SG 
ATOM   1191  HN  VAL    76      22.388  26.626  73.539  1.00   .00      1SG 
ATOM   1192  CA  VAL    76      21.203  25.453  74.810  1.00 14.73      1SG 
ATOM   1193  HA  VAL    76      21.565  24.519  75.214  1.00   .00      1SG 
ATOM   1194  CB  VAL    76      21.399  26.586  75.823  1.00 15.41      1SG 
ATOM   1195  HB  VAL    76      21.118  27.553  75.354  1.00   .00      1SG 
ATOM   1196  CG1 VAL    76      20.534  26.352  77.056  1.00 18.23      1SG 
ATOM   1197 HG11 VAL    76      20.681  25.318  77.435  1.00   .00      1SG 
ATOM   1198 HG12 VAL    76      19.462  26.486  76.797  1.00   .00      1SG 
ATOM   1199 HG13 VAL    76      20.817  27.067  77.858  1.00   .00      1SG 
ATOM   1200  CG2 VAL    76      22.870  26.617  76.252  1.00 18.10      1SG 
ATOM   1201 HG21 VAL    76      23.522  26.792  75.369  1.00   .00      1SG 
ATOM   1202 HG22 VAL    76      23.150  25.645  76.712  1.00   .00      1SG 
ATOM   1203 HG23 VAL    76      23.034  27.438  76.982  1.00   .00      1SG 
ATOM   1204  C   VAL    76      19.703  25.307  74.496  1.00 13.74      1SG 
ATOM   1205  O   VAL    76      19.046  24.367  74.958  1.00 15.04      1SG 
ATOM   1206  N   ASP    77      19.175  26.237  73.700  1.00 14.81      1SG 
ATOM   1207  HN  ASP    77      19.714  26.985  73.322  1.00   .00      1SG 
ATOM   1208  CA  ASP    77      17.759  26.207  73.336  1.00 14.20      1SG 
ATOM   1209  HA  ASP    77      17.183  26.384  74.232  1.00   .00      1SG 
ATOM   1210  CB  ASP    77      17.428  27.271  72.275  1.00 15.11      1SG 
ATOM   1211  HB1 ASP    77      16.399  27.091  71.896  1.00   .00      1SG 
ATOM   1212  HB2 ASP    77      18.148  27.175  71.435  1.00   .00      1SG 
ATOM   1213  CG  ASP    77      17.500  28.686  72.805  1.00 18.47      1SG 
ATOM   1214  OD1 ASP    77      17.630  28.890  74.031  1.00 18.62      1SG 
ATOM   1215  OD2 ASP    77      17.411  29.626  71.987  1.00 20.06      1SG 
ATOM   1216  C   ASP    77      17.327  24.851  72.767  1.00 14.93      1SG 
ATOM   1217  O   ASP    77      16.240  24.351  73.085  1.00 14.38      1SG 
ATOM   1218  N   LEU    78      18.139  24.263  71.880  1.00 13.54      1SG 
ATOM   1219  HN  LEU    78      19.006  24.655  71.584  1.00   .00      1SG 
ATOM   1220  CA  LEU    78      17.748  22.974  71.304  1.00 13.29      1SG 
ATOM   1221  HA  LEU    78      16.826  23.115  70.760  1.00   .00      1SG 
ATOM   1222  CB  LEU    78      18.846  22.454  70.369  1.00 11.08      1SG 
ATOM   1223  HB1 LEU    78      18.690  21.367  70.207  1.00   .00      1SG 
ATOM   1224  HB2 LEU    78      19.831  22.607  70.858  1.00   .00      1SG 
ATOM   1225  CG  LEU    78      18.859  23.164  68.994  1.00 13.24      1SG 
ATOM   1226  HG  LEU    78      18.808  24.263  69.147  1.00   .00      1SG 
ATOM   1227  CD1 LEU    78      20.147  22.815  68.216  1.00 15.49      1SG 
ATOM   1228 HD11 LEU    78      20.300  21.715  68.205  1.00   .00      1SG 
ATOM   1229 HD12 LEU    78      21.024  23.291  68.704  1.00   .00      1SG 
ATOM   1230 HD13 LEU    78      20.064  23.172  67.167  1.00   .00      1SG 
ATOM   1231  CD2 LEU    78      17.641  22.680  68.185  1.00 15.34      1SG 
ATOM   1232 HD21 LEU    78      16.702  22.927  68.725  1.00   .00      1SG 
ATOM   1233 HD22 LEU    78      17.692  21.579  68.047  1.00   .00      1SG 
ATOM   1234 HD23 LEU    78      17.622  23.181  67.194  1.00   .00      1SG 
ATOM   1235  C   LEU    78      17.446  21.940  72.396  1.00 12.44      1SG 
ATOM   1236  O   LEU    78      16.477  21.182  72.313  1.00 14.21      1SG 
ATOM   1237  N   GLY    79      18.301  21.885  73.409  1.00 14.26      1SG 
ATOM   1238  HN  GLY    79      19.102  22.476  73.469  1.00   .00      1SG 
ATOM   1239  CA  GLY    79      18.106  20.945  74.495  1.00 13.95      1SG 
ATOM   1240  HA1 GLY    79      18.989  20.956  75.117  1.00   .00      1SG 
ATOM   1241  HA2 GLY    79      17.961  19.962  74.072  1.00   .00      1SG 
ATOM   1242  C   GLY    79      16.892  21.323  75.330  1.00 15.20      1SG 
ATOM   1243  O   GLY    79      16.078  20.473  75.709  1.00 15.71      1SG 
ATOM   1244  N   THR    80      16.741  22.602  75.594  1.00 12.65      1SG 
ATOM   1245  HN  THR    80      17.367  23.306  75.266  1.00   .00      1SG 
ATOM   1246  CA  THR    80      15.605  23.040  76.408  1.00 16.88      1SG 
ATOM   1247  HA  THR    80      15.630  22.493  77.338  1.00   .00      1SG 
ATOM   1248  CB  THR    80      15.676  24.545  76.676  1.00 19.14      1SG 
ATOM   1249  HB  THR    80      15.661  25.105  75.716  1.00   .00      1SG 
ATOM   1250  OG1 THR    80      16.901  24.835  77.374  1.00 16.03      1SG 
ATOM   1251  HG1 THR    80      16.904  25.784  77.521  1.00   .00      1SG 
ATOM   1252  CG2 THR    80      14.492  24.988  77.552  1.00 20.89      1SG 
ATOM   1253 HG21 THR    80      14.515  24.451  78.524  1.00   .00      1SG 
ATOM   1254 HG22 THR    80      13.534  24.754  77.040  1.00   .00      1SG 
ATOM   1255 HG23 THR    80      14.554  26.080  77.748  1.00   .00      1SG 
ATOM   1256  C   THR    80      14.276  22.712  75.734  1.00 14.85      1SG 
ATOM   1257  O   THR    80      13.321  22.241  76.384  1.00 13.78      1SG 
ATOM   1258  N   LEU    81      14.203  22.979  74.439  1.00 13.91      1SG 
ATOM   1259  HN  LEU    81      14.970  23.355  73.926  1.00   .00      1SG 
ATOM   1260  CA  LEU    81      12.976  22.732  73.688  1.00 14.94      1SG 
ATOM   1261  HA  LEU    81      12.152  23.161  74.239  1.00   .00      1SG 
ATOM   1262  CB  LEU    81      13.072  23.358  72.300  1.00 12.97      1SG 
ATOM   1263  HB1 LEU    81      12.205  23.020  71.693  1.00   .00      1SG 
ATOM   1264  HB2 LEU    81      14.009  23.012  71.814  1.00   .00      1SG 
ATOM   1265  CG  LEU    81      13.076  24.892  72.350  1.00 13.46      1SG 
ATOM   1266  HG  LEU    81      13.717  25.232  73.191  1.00   .00      1SG 
ATOM   1267  CD1 LEU    81      13.613  25.466  71.036  1.00 16.86      1SG 
ATOM   1268 HD11 LEU    81      12.975  25.139  70.187  1.00   .00      1SG 
ATOM   1269 HD12 LEU    81      14.649  25.105  70.861  1.00   .00      1SG 
ATOM   1270 HD13 LEU    81      13.606  26.576  71.077  1.00   .00      1SG 
ATOM   1271  CD2 LEU    81      11.656  25.420  72.621  1.00 15.68      1SG 
ATOM   1272 HD21 LEU    81      11.422  25.347  73.705  1.00   .00      1SG 
ATOM   1273 HD22 LEU    81      10.914  24.816  72.057  1.00   .00      1SG 
ATOM   1274 HD23 LEU    81      11.583  26.485  72.313  1.00   .00      1SG 
ATOM   1275  C   LEU    81      12.646  21.256  73.595  1.00 15.46      1SG 
ATOM   1276  O   LEU    81      11.476  20.868  73.738  1.00 16.65      1SG 
ATOM   1277  N   ARG    82      13.668  20.430  73.382  1.00 15.68      1SG 
ATOM   1278  HN  ARG    82      14.604  20.750  73.256  1.00   .00      1SG 
ATOM   1279  CA  ARG    82      13.454  18.992  73.324  1.00 16.94      1SG 
ATOM   1280  HA  ARG    82      12.792  18.788  72.496  1.00   .00      1SG 
ATOM   1281  CB  ARG    82      14.775  18.243  73.140  1.00 20.45      1SG 
ATOM   1282  HB1 ARG    82      15.380  18.345  74.066  1.00   .00      1SG 
ATOM   1283  HB2 ARG    82      15.333  18.697  72.294  1.00   .00      1SG 
ATOM   1284  CG  ARG    82      14.553  16.754  72.850  1.00 24.76      1SG 
ATOM   1285  HG1 ARG    82      13.881  16.653  71.971  1.00   .00      1SG 
ATOM   1286  HG2 ARG    82      14.067  16.283  73.730  1.00   .00      1SG 
ATOM   1287  CD  ARG    82      15.873  16.024  72.557  1.00 29.35      1SG 
ATOM   1288  HD1 ARG    82      16.446  16.591  71.793  1.00   .00      1SG 
ATOM   1289  HD2 ARG    82      15.654  15.000  72.187  1.00   .00      1SG 
ATOM   1290  NE  ARG    82      16.730  15.889  73.736  1.00 31.30      1SG 
ATOM   1291  HE  ARG    82      17.464  16.557  73.851  1.00   .00      1SG 
ATOM   1292  CZ  ARG    82      16.608  14.946  74.667  1.00 39.85      1SG 
ATOM   1293  NH1 ARG    82      15.654  14.025  74.582  1.00 37.48      1SG 
ATOM   1294 HH11 ARG    82      15.662  13.238  75.199  1.00   .00      1SG 
ATOM   1295 HH12 ARG    82      14.928  14.119  73.901  1.00   .00      1SG 
ATOM   1296  NH2 ARG    82      17.462  14.910  75.689  1.00 40.37      1SG 
ATOM   1297 HH21 ARG    82      17.988  15.726  75.930  1.00   .00      1SG 
ATOM   1298 HH22 ARG    82      17.577  14.067  76.215  1.00   .00      1SG 
ATOM   1299  C   ARG    82      12.816  18.606  74.675  1.00 17.22      1SG 
ATOM   1300  O   ARG    82      11.914  17.734  74.748  1.00 17.33      1SG 
ATOM   1301  N   GLY    83      13.260  19.287  75.728  1.00 13.95      1SG 
ATOM   1302  HN  GLY    83      13.973  19.981  75.661  1.00   .00      1SG 
ATOM   1303  CA  GLY    83      12.703  19.037  77.062  1.00 18.21      1SG 
ATOM   1304  HA1 GLY    83      13.324  19.547  77.784  1.00   .00      1SG 
ATOM   1305  HA2 GLY    83      12.724  17.972  77.239  1.00   .00      1SG 
ATOM   1306  C   GLY    83      11.266  19.539  77.192  1.00 18.82      1SG 
ATOM   1307  O   GLY    83      10.371  18.808  77.674  1.00 17.87      1SG 
ATOM   1308  N   TYR    84      11.015  20.771  76.756  1.00 16.07      1SG 
ATOM   1309  HN  TYR    84      11.709  21.356  76.344  1.00   .00      1SG 
ATOM   1310  CA  TYR    84       9.676  21.314  76.873  1.00 18.02      1SG 
ATOM   1311  HA  TYR    84       9.425  21.342  77.923  1.00   .00      1SG 
ATOM   1312  CB  TYR    84       9.566  22.712  76.275  1.00 17.82      1SG 
ATOM   1313  HB1 TYR    84       8.491  22.984  76.209  1.00   .00      1SG 
ATOM   1314  HB2 TYR    84      10.020  22.699  75.262  1.00   .00      1SG 
ATOM   1315  CG  TYR    84      10.239  23.822  77.027  1.00 18.50      1SG 
ATOM   1316  CD1 TYR    84      10.693  23.647  78.344  1.00 15.38      1SG 
ATOM   1317  HD1 TYR    84      10.586  22.685  78.822  1.00   .00      1SG 
ATOM   1318  CE1 TYR    84      11.285  24.710  79.047  1.00 16.24      1SG 
ATOM   1319  HE1 TYR    84      11.621  24.575  80.064  1.00   .00      1SG 
ATOM   1320  CZ  TYR    84      11.432  25.946  78.407  1.00 18.59      1SG 
ATOM   1321  OH  TYR    84      12.055  26.996  79.055  1.00 17.60      1SG 
ATOM   1322  HH  TYR    84      12.343  27.626  78.390  1.00   .00      1SG 
ATOM   1323  CD2 TYR    84      10.398  25.083  76.415  1.00 18.57      1SG 
ATOM   1324  HD2 TYR    84      10.051  25.227  75.403  1.00   .00      1SG 
ATOM   1325  CE2 TYR    84      10.984  26.129  77.078  1.00 17.14      1SG 
ATOM   1326  HE2 TYR    84      11.103  27.085  76.590  1.00   .00      1SG 
ATOM   1327  C   TYR    84       8.669  20.438  76.152  1.00 17.58      1SG 
ATOM   1328  O   TYR    84       7.543  20.280  76.614  1.00 17.24      1SG 
ATOM   1329  N   TYR    85       9.068  19.879  75.016  1.00 12.55      1SG 
ATOM   1330  HN  TYR    85       9.987  19.996  74.648  1.00   .00      1SG 
ATOM   1331  CA  TYR    85       8.146  19.047  74.242  1.00 18.00      1SG 
ATOM   1332  HA  TYR    85       7.137  19.255  74.567  1.00   .00      1SG 
ATOM   1333  CB  TYR    85       8.324  19.387  72.755  1.00 18.19      1SG 
ATOM   1334  HB1 TYR    85       7.761  18.658  72.134  1.00   .00      1SG 
ATOM   1335  HB2 TYR    85       9.403  19.360  72.491  1.00   .00      1SG 
ATOM   1336  CG  TYR    85       7.804  20.769  72.426  1.00 17.38      1SG 
ATOM   1337  CD1 TYR    85       6.425  20.987  72.277  1.00 20.22      1SG 
ATOM   1338  HD1 TYR    85       5.741  20.160  72.396  1.00   .00      1SG 
ATOM   1339  CE1 TYR    85       5.926  22.247  71.979  1.00 17.98      1SG 
ATOM   1340  HE1 TYR    85       4.861  22.392  71.874  1.00   .00      1SG 
ATOM   1341  CZ  TYR    85       6.792  23.327  71.814  1.00 20.58      1SG 
ATOM   1342  OH  TYR    85       6.268  24.555  71.468  1.00 18.68      1SG 
ATOM   1343  HH  TYR    85       5.312  24.502  71.544  1.00   .00      1SG 
ATOM   1344  CD2 TYR    85       8.676  21.866  72.270  1.00 17.52      1SG 
ATOM   1345  HD2 TYR    85       9.739  21.722  72.391  1.00   .00      1SG 
ATOM   1346  CE2 TYR    85       8.174  23.162  71.955  1.00 16.94      1SG 
ATOM   1347  HE2 TYR    85       8.846  23.998  71.828  1.00   .00      1SG 
ATOM   1348  C   TYR    85       8.321  17.546  74.482  1.00 17.56      1SG 
ATOM   1349  O   TYR    85       7.665  16.729  73.827  1.00 19.18      1SG 
ATOM   1350  N   ASN    86       9.166  17.207  75.450  1.00 16.66      1SG 
ATOM   1351  HN  ASN    86       9.617  17.898  76.009  1.00   .00      1SG 
ATOM   1352  CA  ASN    86       9.502  15.828  75.775  1.00 16.87      1SG 
ATOM   1353  HA  ASN    86      10.435  15.832  76.319  1.00   .00      1SG 
ATOM   1354  CB  ASN    86       8.390  15.174  76.625  1.00 18.49      1SG 
ATOM   1355  HB1 ASN    86       7.512  14.964  75.978  1.00   .00      1SG 
ATOM   1356  HB2 ASN    86       8.088  15.875  77.432  1.00   .00      1SG 
ATOM   1357  CG  ASN    86       8.852  13.872  77.257  1.00 27.24      1SG 
ATOM   1358  OD1 ASN    86      10.013  13.758  77.648  1.00 26.73      1SG 
ATOM   1359  ND2 ASN    86       7.957  12.887  77.365  1.00 21.81      1SG 
ATOM   1360 HD21 ASN    86       8.221  12.014  77.775  1.00   .00      1SG 
ATOM   1361 HD22 ASN    86       7.022  13.022  77.036  1.00   .00      1SG 
ATOM   1362  C   ASN    86       9.745  14.991  74.519  1.00 18.53      1SG 
ATOM   1363  O   ASN    86       9.170  13.910  74.357  1.00 15.16      1SG 
ATOM   1364  N   GLN    87      10.590  15.490  73.613  1.00 17.20      1SG 
ATOM   1365  HN  GLN    87      11.049  16.367  73.734  1.00   .00      1SG 
ATOM   1366  CA  GLN    87      10.885  14.765  72.387  1.00 14.62      1SG 
ATOM   1367  HA  GLN    87      10.040  14.132  72.160  1.00   .00      1SG 
ATOM   1368  CB  GLN    87      11.142  15.744  71.238  1.00 17.09      1SG 
ATOM   1369  HB1 GLN    87      11.443  15.172  70.335  1.00   .00      1SG 
ATOM   1370  HB2 GLN    87      11.970  16.428  71.523  1.00   .00      1SG 
ATOM   1371  CG  GLN    87       9.899  16.573  70.912  1.00 18.72      1SG 
ATOM   1372  HG1 GLN    87       9.410  16.886  71.859  1.00   .00      1SG 
ATOM   1373  HG2 GLN    87       9.190  15.952  70.324  1.00   .00      1SG 
ATOM   1374  CD  GLN    87      10.243  17.810  70.110  1.00 15.15      1SG 
ATOM   1375  OE1 GLN    87      11.297  18.409  70.328  1.00 18.70      1SG 
ATOM   1376  NE2 GLN    87       9.347  18.210  69.187  1.00 18.54      1SG 
ATOM   1377 HE21 GLN    87       9.589  18.926  68.532  1.00   .00      1SG 
ATOM   1378 HE22 GLN    87       8.439  17.791  69.157  1.00   .00      1SG 
ATOM   1379  C   GLN    87      12.097  13.872  72.600  1.00 16.75      1SG 
ATOM   1380  O   GLN    87      12.940  14.147  73.435  1.00 18.34      1SG 
ATOM   1381  N   SER    88      12.173  12.807  71.827  1.00 16.78      1SG 
ATOM   1382  HN  SER    88      11.502  12.610  71.116  1.00   .00      1SG 
ATOM   1383  CA  SER    88      13.258  11.854  71.979  1.00 21.57      1SG 
ATOM   1384  HA  SER    88      13.345  11.604  73.026  1.00   .00      1SG 
ATOM   1385  CB  SER    88      12.970  10.613  71.159  1.00 26.22      1SG 
ATOM   1386  HB1 SER    88      11.924  10.283  71.334  1.00   .00      1SG 
ATOM   1387  HB2 SER    88      13.668   9.800  71.452  1.00   .00      1SG 
ATOM   1388  OG  SER    88      13.137  10.882  69.784  1.00 23.69      1SG 
ATOM   1389  HG1 SER    88      12.790  10.116  69.321  1.00   .00      1SG 
ATOM   1390  C   SER    88      14.569  12.461  71.488  1.00 20.82      1SG 
ATOM   1391  O   SER    88      14.566  13.496  70.839  1.00 18.95      1SG 
ATOM   1392  N   GLU    89      15.684  11.796  71.772  1.00 22.28      1SG 
ATOM   1393  HN  GLU    89      15.694  10.953  72.304  1.00   .00      1SG 
ATOM   1394  CA  GLU    89      16.981  12.302  71.293  1.00 25.32      1SG 
ATOM   1395  HA  GLU    89      16.926  13.380  71.256  1.00   .00      1SG 
ATOM   1396  CB  GLU    89      18.110  11.861  72.220  1.00 31.84      1SG 
ATOM   1397  HB1 GLU    89      19.025  12.427  71.947  1.00   .00      1SG 
ATOM   1398  HB2 GLU    89      18.293  10.779  72.054  1.00   .00      1SG 
ATOM   1399  CG  GLU    89      17.843  12.075  73.685  1.00 41.69      1SG 
ATOM   1400  HG1 GLU    89      17.020  11.402  74.007  1.00   .00      1SG 
ATOM   1401  HG2 GLU    89      17.536  13.130  73.849  1.00   .00      1SG 
ATOM   1402  CD  GLU    89      19.072  11.786  74.537  1.00 48.64      1SG 
ATOM   1403  OE1 GLU    89      19.752  10.769  74.273  1.00 49.87      1SG 
ATOM   1404  OE2 GLU    89      19.355  12.573  75.468  1.00 52.06      1SG 
ATOM   1405  C   GLU    89      17.263  11.775  69.892  1.00 22.33      1SG 
ATOM   1406  O   GLU    89      18.275  12.095  69.275  1.00 25.75      1SG 
ATOM   1407  N   ALA    90      16.353  10.983  69.358  1.00 24.17      1SG 
ATOM   1408  HN  ALA    90      15.509  10.732  69.826  1.00   .00      1SG 
ATOM   1409  CA  ALA    90      16.557  10.434  68.030  1.00 24.56      1SG 
ATOM   1410  HA  ALA    90      17.597  10.159  67.933  1.00   .00      1SG 
ATOM   1411  CB  ALA    90      15.654   9.208  67.833  1.00 27.62      1SG 
ATOM   1412  HB1 ALA    90      14.591   9.524  67.766  1.00   .00      1SG 
ATOM   1413  HB2 ALA    90      15.764   8.515  68.694  1.00   .00      1SG 
ATOM   1414  HB3 ALA    90      15.928   8.683  66.893  1.00   .00      1SG 
ATOM   1415  C   ALA    90      16.355  11.377  66.857  1.00 24.62      1SG 
ATOM   1416  O   ALA    90      16.941  11.168  65.799  1.00 24.06      1SG 
ATOM   1417  N   GLY    91      15.523  12.400  67.010  1.00 18.94      1SG 
ATOM   1418  HN  GLY    91      15.071  12.631  67.868  1.00   .00      1SG 
ATOM   1419  CA  GLY    91      15.259  13.228  65.856  1.00 19.67      1SG 
ATOM   1420  HA1 GLY    91      14.194  13.403  65.836  1.00   .00      1SG 
ATOM   1421  HA2 GLY    91      15.560  12.659  64.989  1.00   .00      1SG 
ATOM   1422  C   GLY    91      15.954  14.570  65.798  1.00 17.16      1SG 
ATOM   1423  O   GLY    91      16.325  15.134  66.822  1.00 18.35      1SG 
ATOM   1424  N   SER    92      16.123  15.073  64.575  1.00 16.64      1SG 
ATOM   1425  HN  SER    92      15.828  14.596  63.751  1.00   .00      1SG 
ATOM   1426  CA  SER    92      16.756  16.363  64.389  1.00 16.04      1SG 
ATOM   1427  HA  SER    92      17.523  16.473  65.141  1.00   .00      1SG 
ATOM   1428  CB  SER    92      17.363  16.457  62.992  1.00 16.78      1SG 
ATOM   1429  HB1 SER    92      16.597  16.177  62.237  1.00   .00      1SG 
ATOM   1430  HB2 SER    92      18.227  15.762  62.918  1.00   .00      1SG 
ATOM   1431  OG  SER    92      17.815  17.766  62.707  1.00 17.18      1SG 
ATOM   1432  HG1 SER    92      18.584  17.908  63.264  1.00   .00      1SG 
ATOM   1433  C   SER    92      15.657  17.404  64.526  1.00 16.18      1SG 
ATOM   1434  O   SER    92      14.531  17.176  64.057  1.00 15.44      1SG 
ATOM   1435  N   HSE    93      15.965  18.519  65.173  1.00 11.68      1SG 
ATOM   1436  HN  HSE    93      16.857  18.675  65.591  1.00   .00      1SG 
ATOM   1437  CA  HSE    93      14.978  19.589  65.299  1.00 10.11      1SG 
ATOM   1438  HA  HSE    93      14.170  19.379  64.614  1.00   .00      1SG 
ATOM   1439  CB  HSE    93      14.455  19.677  66.714  1.00 12.96      1SG 
ATOM   1440  HB1 HSE    93      13.775  20.551  66.797  1.00   .00      1SG 
ATOM   1441  HB2 HSE    93      15.310  19.812  67.410  1.00   .00      1SG 
ATOM   1442  ND1 HSE    93      12.367  18.286  66.844  1.00 19.11      1SG 
ATOM   1443  CG  HSE    93      13.709  18.455  67.108  1.00 16.37      1SG 
ATOM   1444  CE1 HSE    93      11.998  17.066  67.208  1.00 20.41      1SG 
ATOM   1445  HE1 HSE    93      11.003  16.629  67.130  1.00   .00      1SG 
ATOM   1446  NE2 HSE    93      13.057  16.442  67.696  1.00 18.46      1SG 
ATOM   1447  HE2 HSE    93      13.081  15.506  68.048  1.00   .00      1SG 
ATOM   1448  CD2 HSE    93      14.140  17.289  67.646  1.00 19.94      1SG 
ATOM   1449  HD2 HSE    93      15.129  17.014  67.990  1.00   .00      1SG 
ATOM   1450  C   HSE    93      15.612  20.881  64.860  1.00 12.89      1SG 
ATOM   1451  O   HSE    93      16.865  21.012  64.821  1.00 12.68      1SG 
ATOM   1452  N   THR    94      14.759  21.845  64.545  1.00 10.88      1SG 
ATOM   1453  HN  THR    94      13.772  21.760  64.655  1.00   .00      1SG 
ATOM   1454  CA  THR    94      15.265  23.098  64.011  1.00 13.02      1SG 
ATOM   1455  HA  THR    94      16.344  23.062  64.022  1.00   .00      1SG 
ATOM   1456  CB  THR    94      14.736  23.290  62.555  1.00 12.14      1SG 
ATOM   1457  HB  THR    94      13.638  23.458  62.574  1.00   .00      1SG 
ATOM   1458  OG1 THR    94      15.013  22.119  61.763  1.00 17.20      1SG 
ATOM   1459  HG1 THR    94      14.560  21.393  62.197  1.00   .00      1SG 
ATOM   1460  CG2 THR    94      15.355  24.530  61.913  1.00 15.03      1SG 
ATOM   1461 HG21 THR    94      16.459  24.513  62.037  1.00   .00      1SG 
ATOM   1462 HG22 THR    94      14.957  25.446  62.400  1.00   .00      1SG 
ATOM   1463 HG23 THR    94      15.120  24.551  60.827  1.00   .00      1SG 
ATOM   1464  C   THR    94      14.816  24.317  64.775  1.00 12.92      1SG 
ATOM   1465  O   THR    94      13.621  24.435  65.054  1.00 15.91      1SG 
ATOM   1466  N   VAL    95      15.756  25.225  65.081  1.00 12.38      1SG 
ATOM   1467  HN  VAL    95      16.727  25.090  64.899  1.00   .00      1SG 
ATOM   1468  CA  VAL    95      15.362  26.477  65.711  1.00 12.57      1SG 
ATOM   1469  HA  VAL    95      14.301  26.421  65.900  1.00   .00      1SG 
ATOM   1470  CB  VAL    95      16.102  26.762  67.018  1.00 16.76      1SG 
ATOM   1471  HB  VAL    95      17.184  26.544  66.891  1.00   .00      1SG 
ATOM   1472  CG1 VAL    95      15.913  28.231  67.390  1.00 18.14      1SG 
ATOM   1473 HG11 VAL    95      14.836  28.500  67.346  1.00   .00      1SG 
ATOM   1474 HG12 VAL    95      16.469  28.876  66.677  1.00   .00      1SG 
ATOM   1475 HG13 VAL    95      16.282  28.410  68.423  1.00   .00      1SG 
ATOM   1476  CG2 VAL    95      15.502  25.912  68.149  1.00 16.84      1SG 
ATOM   1477 HG21 VAL    95      15.597  24.832  67.907  1.00   .00      1SG 
ATOM   1478 HG22 VAL    95      14.425  26.154  68.273  1.00   .00      1SG 
ATOM   1479 HG23 VAL    95      16.042  26.111  69.099  1.00   .00      1SG 
ATOM   1480  C   VAL    95      15.720  27.565  64.705  1.00 15.80      1SG 
ATOM   1481  O   VAL    95      16.776  27.502  64.060  1.00 12.90      1SG 
ATOM   1482  N   GLN    96      14.825  28.530  64.527  1.00 10.61      1SG 
ATOM   1483  HN  GLN    96      13.948  28.548  65.000  1.00   .00      1SG 
ATOM   1484  CA  GLN    96      15.101  29.628  63.607  1.00 11.85      1SG 
ATOM   1485  HA  GLN    96      16.146  29.585  63.340  1.00   .00      1SG 
ATOM   1486  CB  GLN    96      14.232  29.520  62.360  1.00 10.38      1SG 
ATOM   1487  HB1 GLN    96      14.239  30.496  61.829  1.00   .00      1SG 
ATOM   1488  HB2 GLN    96      13.190  29.285  62.665  1.00   .00      1SG 
ATOM   1489  CG  GLN    96      14.727  28.436  61.411  1.00 12.48      1SG 
ATOM   1490  HG1 GLN    96      15.029  27.543  62.000  1.00   .00      1SG 
ATOM   1491  HG2 GLN    96      15.606  28.815  60.848  1.00   .00      1SG 
ATOM   1492  CD  GLN    96      13.649  28.028  60.420  1.00 12.53      1SG 
ATOM   1493  OE1 GLN    96      12.820  27.162  60.702  1.00 14.93      1SG 
ATOM   1494  NE2 GLN    96      13.662  28.653  59.250  1.00  9.05      1SG 
ATOM   1495 HE21 GLN    96      12.978  28.429  58.556  1.00   .00      1SG 
ATOM   1496 HE22 GLN    96      14.356  29.348  59.062  1.00   .00      1SG 
ATOM   1497  C   GLN    96      14.788  30.924  64.285  1.00 12.74      1SG 
ATOM   1498  O   GLN    96      13.785  31.033  64.988  1.00 11.65      1SG 
ATOM   1499  N   ARG    97      15.654  31.910  64.089  1.00 10.79      1SG 
ATOM   1500  HN  ARG    97      16.484  31.810  63.545  1.00   .00      1SG 
ATOM   1501  CA  ARG    97      15.404  33.203  64.683  1.00 11.72      1SG 
ATOM   1502  HA  ARG    97      14.385  33.209  65.041  1.00   .00      1SG 
ATOM   1503  CB  ARG    97      16.371  33.497  65.842  1.00 13.33      1SG 
ATOM   1504  HB1 ARG    97      17.408  33.551  65.447  1.00   .00      1SG 
ATOM   1505  HB2 ARG    97      16.312  32.673  66.584  1.00   .00      1SG 
ATOM   1506  CG  ARG    97      16.025  34.827  66.535  1.00 15.91      1SG 
ATOM   1507  HG1 ARG    97      15.106  34.682  67.141  1.00   .00      1SG 
ATOM   1508  HG2 ARG    97      15.824  35.591  65.755  1.00   .00      1SG 
ATOM   1509  CD  ARG    97      17.145  35.349  67.457  1.00 17.62      1SG 
ATOM   1510  HD1 ARG    97      16.746  36.158  68.105  1.00   .00      1SG 
ATOM   1511  HD2 ARG    97      17.985  35.734  66.840  1.00   .00      1SG 
ATOM   1512  NE  ARG    97      17.679  34.312  68.328  1.00 22.48      1SG 
ATOM   1513  HE  ARG    97      18.304  33.648  67.920  1.00   .00      1SG 
ATOM   1514  CZ  ARG    97      17.403  34.176  69.625  1.00 24.76      1SG 
ATOM   1515  NH1 ARG    97      16.591  35.022  70.257  1.00 21.20      1SG 
ATOM   1516 HH11 ARG    97      16.173  35.781  69.758  1.00   .00      1SG 
ATOM   1517 HH12 ARG    97      16.400  34.898  71.231  1.00   .00      1SG 
ATOM   1518  NH2 ARG    97      17.926  33.150  70.294  1.00 25.03      1SG 
ATOM   1519 HH21 ARG    97      18.517  32.495  69.823  1.00   .00      1SG 
ATOM   1520 HH22 ARG    97      17.728  33.035  71.267  1.00   .00      1SG 
ATOM   1521  C   ARG    97      15.604  34.258  63.610  1.00 13.11      1SG 
ATOM   1522  O   ARG    97      16.513  34.154  62.779  1.00 10.90      1SG 
ATOM   1523  N   MET    98      14.747  35.268  63.635  1.00 10.83      1SG 
ATOM   1524  HN  MET    98      13.991  35.324  64.282  1.00   .00      1SG 
ATOM   1525  CA  MET    98      14.889  36.362  62.688  1.00 11.35      1SG 
ATOM   1526  HA  MET    98      15.890  36.329  62.283  1.00   .00      1SG 
ATOM   1527  CB  MET    98      13.859  36.230  61.571  1.00 20.67      1SG 
ATOM   1528  HB1 MET    98      12.845  36.271  62.021  1.00   .00      1SG 
ATOM   1529  HB2 MET    98      13.996  35.243  61.081  1.00   .00      1SG 
ATOM   1530  CG  MET    98      13.959  37.319  60.503  1.00 24.38      1SG 
ATOM   1531  HG1 MET    98      13.475  36.938  59.579  1.00   .00      1SG 
ATOM   1532  HG2 MET    98      15.034  37.491  60.289  1.00   .00      1SG 
ATOM   1533  SD  MET    98      13.177  38.926  60.970  1.00 29.91      1SG 
ATOM   1534  CE  MET    98      11.429  38.539  60.502  1.00 33.58      1SG 
ATOM   1535  HE1 MET    98      11.042  37.668  61.073  1.00   .00      1SG 
ATOM   1536  HE2 MET    98      11.367  38.295  59.420  1.00   .00      1SG 
ATOM   1537  HE3 MET    98      10.773  39.409  60.716  1.00   .00      1SG 
ATOM   1538  C   MET    98      14.630  37.667  63.440  1.00 14.67      1SG 
ATOM   1539  O   MET    98      13.723  37.722  64.278  1.00 14.19      1SG 
ATOM   1540  N   TYR    99      15.452  38.692  63.200  1.00 14.58      1SG 
ATOM   1541  HN  TYR    99      16.246  38.626  62.601  1.00   .00      1SG 
ATOM   1542  CA  TYR    99      15.200  39.972  63.828  1.00 11.39      1SG 
ATOM   1543  HA  TYR    99      14.130  40.116  63.849  1.00   .00      1SG 
ATOM   1544  CB  TYR    99      15.768  40.065  65.264  1.00 12.16      1SG 
ATOM   1545  HB1 TYR    99      15.294  39.264  65.870  1.00   .00      1SG 
ATOM   1546  HB2 TYR    99      15.501  41.063  65.671  1.00   .00      1SG 
ATOM   1547  CG  TYR    99      17.274  39.916  65.485  1.00 13.93      1SG 
ATOM   1548  CD1 TYR    99      18.170  40.932  65.125  1.00 16.45      1SG 
ATOM   1549  HD1 TYR    99      17.803  41.803  64.602  1.00   .00      1SG 
ATOM   1550  CE1 TYR    99      19.536  40.837  65.433  1.00 12.85      1SG 
ATOM   1551  HE1 TYR    99      20.211  41.630  65.147  1.00   .00      1SG 
ATOM   1552  CZ  TYR    99      20.018  39.721  66.107  1.00 11.88      1SG 
ATOM   1553  OH  TYR    99      21.325  39.672  66.475  1.00 15.47      1SG 
ATOM   1554  HH  TYR    99      21.762  39.012  65.932  1.00   .00      1SG 
ATOM   1555  CD2 TYR    99      17.777  38.797  66.144  1.00 11.77      1SG 
ATOM   1556  HD2 TYR    99      17.102  37.999  66.415  1.00   .00      1SG 
ATOM   1557  CE2 TYR    99      19.141  38.680  66.466  1.00 14.14      1SG 
ATOM   1558  HE2 TYR    99      19.510  37.805  66.981  1.00   .00      1SG 
ATOM   1559  C   TYR    99      15.748  41.059  62.918  1.00 14.54      1SG 
ATOM   1560  O   TYR    99      16.592  40.804  62.052  1.00 12.00      1SG 
ATOM   1561  N   GLY   100      15.230  42.262  63.079  1.00 14.81      1SG 
ATOM   1562  HN  GLY   100      14.517  42.477  63.742  1.00   .00      1SG 
ATOM   1563  CA  GLY   100      15.727  43.339  62.242  1.00 11.46      1SG 
ATOM   1564  HA1 GLY   100      15.794  42.981  61.225  1.00   .00      1SG 
ATOM   1565  HA2 GLY   100      16.704  43.629  62.600  1.00   .00      1SG 
ATOM   1566  C   GLY   100      14.788  44.525  62.304  1.00 19.28      1SG 
ATOM   1567  O   GLY   100      13.808  44.538  63.057  1.00 15.68      1SG 
ATOM   1568  N   CYS   101      15.060  45.512  61.463  1.00 17.95      1SG 
ATOM   1569  HN  CYS   101      15.794  45.464  60.790  1.00   .00      1SG 
ATOM   1570  CA  CYS   101      14.276  46.732  61.495  1.00 17.57      1SG 
ATOM   1571  HA  CYS   101      13.324  46.520  61.958  1.00   .00      1SG 
ATOM   1572  CB  CYS   101      15.059  47.782  62.303  1.00 23.01      1SG 
ATOM   1573  HB1 CYS   101      15.018  47.484  63.371  1.00   .00      1SG 
ATOM   1574  HB2 CYS   101      14.535  48.753  62.190  1.00   .00      1SG 
ATOM   1575  SG  CYS   101      16.831  48.007  61.820  1.00 29.48      1SG 
ATOM   1576  HG1 CYS   101      17.079  48.943  62.724  1.00   .00      1SG 
ATOM   1577  C   CYS   101      14.017  47.250  60.087  1.00 18.75      1SG 
ATOM   1578  O   CYS   101      14.754  46.918  59.149  1.00 18.86      1SG 
ATOM   1579  N   ASP   102      12.962  48.045  59.943  1.00 18.31      1SG 
ATOM   1580  HN  ASP   102      12.355  48.255  60.705  1.00   .00      1SG 
ATOM   1581  CA  ASP   102      12.615  48.669  58.657  1.00 21.31      1SG 
ATOM   1582  HA  ASP   102      13.294  48.281  57.913  1.00   .00      1SG 
ATOM   1583  CB  ASP   102      11.168  48.385  58.241  1.00 22.95      1SG 
ATOM   1584  HB1 ASP   102      10.930  48.998  57.346  1.00   .00      1SG 
ATOM   1585  HB2 ASP   102      10.495  48.679  59.074  1.00   .00      1SG 
ATOM   1586  CG  ASP   102      10.898  46.938  57.906  1.00 27.18      1SG 
ATOM   1587  OD1 ASP   102      11.841  46.196  57.592  1.00 26.07      1SG 
ATOM   1588  OD2 ASP   102       9.716  46.553  57.920  1.00 26.01      1SG 
ATOM   1589  C   ASP   102      12.681  50.180  58.888  1.00 23.98      1SG 
ATOM   1590  O   ASP   102      12.360  50.645  59.979  1.00 19.87      1SG 
ATOM   1591  N   VAL   103      13.108  50.941  57.880  1.00 24.64      1SG 
ATOM   1592  HN  VAL   103      13.451  50.552  57.029  1.00   .00      1SG 
ATOM   1593  CA  VAL   103      13.097  52.410  57.967  1.00 24.87      1SG 
ATOM   1594  HA  VAL   103      12.583  52.673  58.879  1.00   .00      1SG 
ATOM   1595  CB  VAL   103      14.509  53.040  57.967  1.00 21.02      1SG 
ATOM   1596  HB  VAL   103      14.421  54.147  57.924  1.00   .00      1SG 
ATOM   1597  CG1 VAL   103      15.266  52.638  59.237  1.00 21.63      1SG 
ATOM   1598 HG11 VAL   103      15.367  51.533  59.288  1.00   .00      1SG 
ATOM   1599 HG12 VAL   103      14.710  52.985  60.134  1.00   .00      1SG 
ATOM   1600 HG13 VAL   103      16.282  53.087  59.230  1.00   .00      1SG 
ATOM   1601  CG2 VAL   103      15.267  52.640  56.700  1.00 24.08      1SG 
ATOM   1602 HG21 VAL   103      14.719  52.992  55.800  1.00   .00      1SG 
ATOM   1603 HG22 VAL   103      15.361  51.534  56.649  1.00   .00      1SG 
ATOM   1604 HG23 VAL   103      16.278  53.101  56.702  1.00   .00      1SG 
ATOM   1605  C   VAL   103      12.353  52.900  56.722  1.00 25.70      1SG 
ATOM   1606  O   VAL   103      12.354  52.220  55.679  1.00 22.85      1SG 
ATOM   1607  N   GLY   104      11.691  54.051  56.831  1.00 25.60      1SG 
ATOM   1608  HN  GLY   104      11.655  54.581  57.675  1.00   .00      1SG 
ATOM   1609  CA  GLY   104      10.978  54.584  55.681  1.00 26.70      1SG 
ATOM   1610  HA1 GLY   104      10.219  55.260  56.046  1.00   .00      1SG 
ATOM   1611  HA2 GLY   104      10.520  53.755  55.162  1.00   .00      1SG 
ATOM   1612  C   GLY   104      11.889  55.335  54.713  1.00 29.08      1SG 
ATOM   1613  O   GLY   104      13.113  55.329  54.847  1.00 26.61      1SG 
ATOM   1614  N   SER   105      11.278  56.003  53.737  1.00 32.02      1SG 
ATOM   1615  HN  SER   105      10.285  56.018  53.647  1.00   .00      1SG 
ATOM   1616  CA  SER   105      12.022  56.755  52.738  1.00 33.25      1SG 
ATOM   1617  HA  SER   105      12.676  56.071  52.218  1.00   .00      1SG 
ATOM   1618  CB  SER   105      11.054  57.420  51.759  1.00 36.80      1SG 
ATOM   1619  HB1 SER   105      11.625  57.938  50.959  1.00   .00      1SG 
ATOM   1620  HB2 SER   105      10.422  58.157  52.298  1.00   .00      1SG 
ATOM   1621  OG  SER   105      10.215  56.444  51.165  1.00 45.48      1SG 
ATOM   1622  HG1 SER   105       9.387  56.889  50.972  1.00   .00      1SG 
ATOM   1623  C   SER   105      12.897  57.815  53.357  1.00 32.11      1SG 
ATOM   1624  O   SER   105      13.870  58.248  52.750  1.00 31.37      1SG 
ATOM   1625  N   ASP   106      12.544  58.248  54.562  1.00 29.10      1SG 
ATOM   1626  HN  ASP   106      11.745  57.897  55.043  1.00   .00      1SG 
ATOM   1627  CA  ASP   106      13.320  59.276  55.254  1.00 30.92      1SG 
ATOM   1628  HA  ASP   106      13.823  59.878  54.512  1.00   .00      1SG 
ATOM   1629  CB  ASP   106      12.382  60.145  56.110  1.00 32.91      1SG 
ATOM   1630  HB1 ASP   106      11.634  60.630  55.448  1.00   .00      1SG 
ATOM   1631  HB2 ASP   106      12.981  60.929  56.620  1.00   .00      1SG 
ATOM   1632  CG  ASP   106      11.639  59.333  57.171  1.00 41.64      1SG 
ATOM   1633  OD1 ASP   106      11.829  58.093  57.220  1.00 37.35      1SG 
ATOM   1634  OD2 ASP   106      10.861  59.932  57.950  1.00 38.75      1SG 
ATOM   1635  C   ASP   106      14.383  58.616  56.141  1.00 30.82      1SG 
ATOM   1636  O   ASP   106      15.092  59.288  56.884  1.00 29.69      1SG 
ATOM   1637  N   TRP   107      14.472  57.291  56.040  1.00 27.87      1SG 
ATOM   1638  HN  TRP   107      13.874  56.783  55.426  1.00   .00      1SG 
ATOM   1639  CA  TRP   107      15.423  56.470  56.792  1.00 27.95      1SG 
ATOM   1640  HA  TRP   107      15.257  55.437  56.523  1.00   .00      1SG 
ATOM   1641  CB  TRP   107      16.856  56.871  56.478  1.00 28.52      1SG 
ATOM   1642  HB1 TRP   107      17.530  56.396  57.222  1.00   .00      1SG 
ATOM   1643  HB2 TRP   107      16.942  57.975  56.560  1.00   .00      1SG 
ATOM   1644  CG  TRP   107      17.312  56.465  55.105  1.00 26.68      1SG 
ATOM   1645  CD1 TRP   107      16.535  56.090  54.052  1.00 25.85      1SG 
ATOM   1646  HD1 TRP   107      15.462  55.971  54.088  1.00   .00      1SG 
ATOM   1647  NE1 TRP   107      17.315  55.883  52.932  1.00 26.01      1SG 
ATOM   1648  HE1 TRP   107      16.990  55.613  52.052  1.00   .00      1SG 
ATOM   1649  CE2 TRP   107      18.622  56.121  53.263  1.00 23.45      1SG 
ATOM   1650  CD2 TRP   107      18.654  56.489  54.627  1.00 27.07      1SG 
ATOM   1651  CE3 TRP   107      19.887  56.791  55.222  1.00 27.57      1SG 
ATOM   1652  HE3 TRP   107      19.961  57.077  56.261  1.00   .00      1SG 
ATOM   1653  CZ3 TRP   107      21.032  56.717  54.449  1.00 25.90      1SG 
ATOM   1654  HZ3 TRP   107      21.989  56.946  54.895  1.00   .00      1SG 
ATOM   1655  CZ2 TRP   107      19.778  56.046  52.480  1.00 25.72      1SG 
ATOM   1656  HZ2 TRP   107      19.753  55.764  51.438  1.00   .00      1SG 
ATOM   1657  CH2 TRP   107      20.971  56.348  53.089  1.00 27.43      1SG 
ATOM   1658  HH2 TRP   107      21.884  56.302  52.513  1.00   .00      1SG 
ATOM   1659  C   TRP   107      15.202  56.486  58.287  1.00 27.56      1SG 
ATOM   1660  O   TRP   107      16.121  56.204  59.067  1.00 26.86      1SG 
ATOM   1661  N   ARG   108      13.983  56.826  58.685  1.00 26.13      1SG 
ATOM   1662  HN  ARG   108      13.263  57.092  58.049  1.00   .00      1SG 
ATOM   1663  CA  ARG   108      13.640  56.824  60.096  1.00 27.59      1SG 
ATOM   1664  HA  ARG   108      14.557  56.834  60.665  1.00   .00      1SG 
ATOM   1665  CB  ARG   108      12.786  58.052  60.435  1.00 31.51      1SG 
ATOM   1666  HB1 ARG   108      12.371  57.935  61.459  1.00   .00      1SG 
ATOM   1667  HB2 ARG   108      11.945  58.120  59.712  1.00   .00      1SG 
ATOM   1668  CG  ARG   108      13.620  59.364  60.371  1.00 36.00      1SG 
ATOM   1669  HG1 ARG   108      13.934  59.539  59.320  1.00   .00      1SG 
ATOM   1670  HG2 ARG   108      14.526  59.244  61.001  1.00   .00      1SG 
ATOM   1671  CD  ARG   108      12.836  60.582  60.861  1.00 39.60      1SG 
ATOM   1672  HD1 ARG   108      11.846  60.619  60.358  1.00   .00      1SG 
ATOM   1673  HD2 ARG   108      13.409  61.509  60.646  1.00   .00      1SG 
ATOM   1674  NE  ARG   108      12.602  60.527  62.300  1.00 47.66      1SG 
ATOM   1675  HE  ARG   108      13.382  60.319  62.889  1.00   .00      1SG 
ATOM   1676  CZ  ARG   108      11.423  60.734  62.884  1.00 51.13      1SG 
ATOM   1677  NH1 ARG   108      10.353  61.012  62.152  1.00 50.90      1SG 
ATOM   1678 HH11 ARG   108      10.429  61.067  61.156  1.00   .00      1SG 
ATOM   1679 HH12 ARG   108       9.470  61.167  62.596  1.00   .00      1SG 
ATOM   1680  NH2 ARG   108      11.313  60.651  64.207  1.00 52.40      1SG 
ATOM   1681 HH21 ARG   108      12.115  60.433  64.763  1.00   .00      1SG 
ATOM   1682 HH22 ARG   108      10.428  60.806  64.646  1.00   .00      1SG 
ATOM   1683  C   ARG   108      12.917  55.520  60.423  1.00 20.50      1SG 
ATOM   1684  O   ARG   108      12.231  54.938  59.570  1.00 22.44      1SG 
ATOM   1685  N   PHE   109      13.103  55.053  61.655  1.00 24.00      1SG 
ATOM   1686  HN  PHE   109      13.668  55.538  62.317  1.00   .00      1SG 
ATOM   1687  CA  PHE   109      12.502  53.809  62.129  1.00 23.29      1SG 
ATOM   1688  HA  PHE   109      12.982  52.985  61.621  1.00   .00      1SG 
ATOM   1689  CB  PHE   109      12.692  53.691  63.646  1.00 23.71      1SG 
ATOM   1690  HB1 PHE   109      12.268  54.591  64.141  1.00   .00      1SG 
ATOM   1691  HB2 PHE   109      13.776  53.604  63.875  1.00   .00      1SG 
ATOM   1692  CG  PHE   109      12.017  52.500  64.238  1.00 25.74      1SG 
ATOM   1693  CD1 PHE   109      10.725  52.601  64.776  1.00 26.62      1SG 
ATOM   1694  HD1 PHE   109      10.229  53.560  64.802  1.00   .00      1SG 
ATOM   1695  CE1 PHE   109      10.069  51.460  65.283  1.00 29.53      1SG 
ATOM   1696  HE1 PHE   109       9.075  51.542  65.698  1.00   .00      1SG 
ATOM   1697  CZ  PHE   109      10.720  50.214  65.244  1.00 26.92      1SG 
ATOM   1698  HZ  PHE   109      10.227  49.334  65.629  1.00   .00      1SG 
ATOM   1699  CD2 PHE   109      12.641  51.255  64.212  1.00 28.19      1SG 
ATOM   1700  HD2 PHE   109      13.636  51.168  63.801  1.00   .00      1SG 
ATOM   1701  CE2 PHE   109      12.001  50.117  64.709  1.00 26.88      1SG 
ATOM   1702  HE2 PHE   109      12.501  49.160  64.678  1.00   .00      1SG 
ATOM   1703  C   PHE   109      11.027  53.678  61.800  1.00 27.04      1SG 
ATOM   1704  O   PHE   109      10.238  54.596  62.063  1.00 25.93      1SG 
ATOM   1705  N   LEU   110      10.661  52.543  61.209  1.00 19.89      1SG 
ATOM   1706  HN  LEU   110      11.325  51.838  60.973  1.00   .00      1SG 
ATOM   1707  CA  LEU   110       9.273  52.244  60.863  1.00 22.67      1SG 
ATOM   1708  HA  LEU   110       8.694  53.141  61.023  1.00   .00      1SG 
ATOM   1709  CB  LEU   110       9.134  51.781  59.406  1.00 26.31      1SG 
ATOM   1710  HB1 LEU   110       8.339  51.009  59.398  1.00   .00      1SG 
ATOM   1711  HB2 LEU   110      10.101  51.313  59.133  1.00   .00      1SG 
ATOM   1712  CG  LEU   110       8.797  52.759  58.284  1.00 34.22      1SG 
ATOM   1713  HG  LEU   110       9.652  53.448  58.115  1.00   .00      1SG 
ATOM   1714  CD1 LEU   110       8.512  51.957  57.004  1.00 31.73      1SG 
ATOM   1715 HD11 LEU   110       7.656  51.268  57.168  1.00   .00      1SG 
ATOM   1716 HD12 LEU   110       9.404  51.355  56.729  1.00   .00      1SG 
ATOM   1717 HD13 LEU   110       8.257  52.649  56.173  1.00   .00      1SG 
ATOM   1718  CD2 LEU   110       7.576  53.587  58.673  1.00 35.43      1SG 
ATOM   1719 HD21 LEU   110       7.838  54.292  59.491  1.00   .00      1SG 
ATOM   1720 HD22 LEU   110       6.763  52.918  59.028  1.00   .00      1SG 
ATOM   1721 HD23 LEU   110       7.223  54.174  57.798  1.00   .00      1SG 
ATOM   1722  C   LEU   110       8.756  51.109  61.739  1.00 24.57      1SG 
ATOM   1723  O   LEU   110       7.701  51.230  62.380  1.00 24.32      1SG 
ATOM   1724  N   ARG   111       9.514  50.009  61.793  1.00 21.54      1SG 
ATOM   1725  HN  ARG   111      10.393  49.934  61.328  1.00   .00      1SG 
ATOM   1726  CA  ARG   111       9.068  48.842  62.558  1.00 21.68      1SG 
ATOM   1727  HA  ARG   111       8.618  49.176  63.481  1.00   .00      1SG 
ATOM   1728  CB  ARG   111       8.056  48.105  61.683  1.00 26.69      1SG 
ATOM   1729  HB1 ARG   111       8.536  47.938  60.697  1.00   .00      1SG 
ATOM   1730  HB2 ARG   111       7.185  48.779  61.553  1.00   .00      1SG 
ATOM   1731  CG  ARG   111       7.520  46.766  62.152  1.00 39.52      1SG 
ATOM   1732  HG1 ARG   111       6.907  46.905  63.068  1.00   .00      1SG 
ATOM   1733  HG2 ARG   111       8.364  46.083  62.386  1.00   .00      1SG 
ATOM   1734  CD  ARG   111       6.648  46.157  61.023  1.00 47.35      1SG 
ATOM   1735  HD1 ARG   111       5.607  46.533  61.111  1.00   .00      1SG 
ATOM   1736  HD2 ARG   111       6.661  45.049  61.098  1.00   .00      1SG 
ATOM   1737  NE  ARG   111       7.142  46.520  59.682  1.00 51.35      1SG 
ATOM   1738  HE  ARG   111       7.765  45.882  59.230  1.00   .00      1SG 
ATOM   1739  CZ  ARG   111       6.818  47.641  59.024  1.00 52.85      1SG 
ATOM   1740  NH1 ARG   111       5.979  48.511  59.583  1.00 52.76      1SG 
ATOM   1741 HH11 ARG   111       5.596  48.325  60.488  1.00   .00      1SG 
ATOM   1742 HH12 ARG   111       5.732  49.350  59.098  1.00   .00      1SG 
ATOM   1743  NH2 ARG   111       7.356  47.914  57.821  1.00 37.30      1SG 
ATOM   1744 HH21 ARG   111       6.999  48.671  57.274  1.00   .00      1SG 
ATOM   1745 HH22 ARG   111       8.113  47.360  57.474  1.00   .00      1SG 
ATOM   1746  C   ARG   111      10.249  47.937  62.897  1.00 21.30      1SG 
ATOM   1747  O   ARG   111      11.292  47.969  62.220  1.00 20.33      1SG 
ATOM   1748  N   GLY   112      10.098  47.165  63.970  1.00 18.93      1SG 
ATOM   1749  HN  GLY   112       9.279  47.176  64.539  1.00   .00      1SG 
ATOM   1750  CA  GLY   112      11.165  46.248  64.357  1.00 18.99      1SG 
ATOM   1751  HA1 GLY   112      11.615  46.596  65.275  1.00   .00      1SG 
ATOM   1752  HA2 GLY   112      11.903  46.212  63.570  1.00   .00      1SG 
ATOM   1753  C   GLY   112      10.549  44.878  64.561  1.00 18.71      1SG 
ATOM   1754  O   GLY   112       9.308  44.762  64.664  1.00 22.06      1SG 
ATOM   1755  N   TYR   113      11.370  43.823  64.566  1.00 16.06      1SG 
ATOM   1756  HN  TYR   113      12.352  43.884  64.403  1.00   .00      1SG 
ATOM   1757  CA  TYR   113      10.803  42.498  64.825  1.00 19.73      1SG 
ATOM   1758  HA  TYR   113      10.085  42.610  65.624  1.00   .00      1SG 
ATOM   1759  CB  TYR   113      10.122  41.864  63.612  1.00 31.47      1SG 
ATOM   1760  HB1 TYR   113       9.019  41.965  63.703  1.00   .00      1SG 
ATOM   1761  HB2 TYR   113      10.402  40.791  63.541  1.00   .00      1SG 
ATOM   1762  CG  TYR   113      10.533  42.521  62.362  1.00 38.33      1SG 
ATOM   1763  CD1 TYR   113      11.844  42.442  61.936  1.00 45.07      1SG 
ATOM   1764  HD1 TYR   113      12.513  41.724  62.387  1.00   .00      1SG 
ATOM   1765  CE1 TYR   113      12.300  43.267  60.948  1.00 50.62      1SG 
ATOM   1766  HE1 TYR   113      13.327  43.211  60.618  1.00   .00      1SG 
ATOM   1767  CZ  TYR   113      11.426  44.177  60.375  1.00 48.92      1SG 
ATOM   1768  OH  TYR   113      11.891  45.082  59.470  1.00 54.15      1SG 
ATOM   1769  HH  TYR   113      11.134  45.516  59.068  1.00   .00      1SG 
ATOM   1770  CD2 TYR   113       9.681  43.419  61.742  1.00 43.70      1SG 
ATOM   1771  HD2 TYR   113       8.646  43.464  62.047  1.00   .00      1SG 
ATOM   1772  CE2 TYR   113      10.120  44.244  60.759  1.00 46.26      1SG 
ATOM   1773  HE2 TYR   113       9.445  44.943  60.288  1.00   .00      1SG 
ATOM   1774  C   TYR   113      11.815  41.551  65.331  1.00 13.99      1SG 
ATOM   1775  O   TYR   113      13.015  41.746  65.191  1.00 13.29      1SG 
ATOM   1776  N   HSE   114      11.299  40.561  66.023  1.00 16.61      1SG 
ATOM   1777  HN  HSE   114      10.322  40.481  66.203  1.00   .00      1SG 
ATOM   1778  CA  HSE   114      12.151  39.518  66.567  1.00 14.71      1SG 
ATOM   1779  HA  HSE   114      12.958  39.355  65.868  1.00   .00      1SG 
ATOM   1780  CB  HSE   114      12.712  39.898  67.933  1.00 15.68      1SG 
ATOM   1781  HB1 HSE   114      11.889  40.295  68.564  1.00   .00      1SG 
ATOM   1782  HB2 HSE   114      13.483  40.686  67.801  1.00   .00      1SG 
ATOM   1783  ND1 HSE   114      14.697  38.519  68.676  1.00 24.12      1SG 
ATOM   1784  CG  HSE   114      13.336  38.736  68.640  1.00 16.35      1SG 
ATOM   1785  CE1 HSE   114      14.941  37.355  69.255  1.00 18.04      1SG 
ATOM   1786  HE1 HSE   114      15.915  36.899  69.431  1.00   .00      1SG 
ATOM   1787  NE2 HSE   114      13.785  36.813  69.598  1.00 26.98      1SG 
ATOM   1788  HE2 HSE   114      13.657  35.931  70.051  1.00   .00      1SG 
ATOM   1789  CD2 HSE   114      12.767  37.661  69.231  1.00 15.83      1SG 
ATOM   1790  HD2 HSE   114      11.720  37.449  69.411  1.00   .00      1SG 
ATOM   1791  C   HSE   114      11.208  38.340  66.695  1.00 15.57      1SG 
ATOM   1792  O   HSE   114      10.296  38.346  67.539  1.00 18.61      1SG 
ATOM   1793  N   GLN   115      11.415  37.338  65.833  1.00 13.82      1SG 
ATOM   1794  HN  GLN   115      12.172  37.352  65.185  1.00   .00      1SG 
ATOM   1795  CA  GLN   115      10.549  36.152  65.777  1.00 13.90      1SG 
ATOM   1796  HA  GLN   115       9.844  36.206  66.593  1.00   .00      1SG 
ATOM   1797  CB  GLN   115       9.813  36.125  64.423  1.00 22.31      1SG 
ATOM   1798  HB1 GLN   115       9.270  35.161  64.321  1.00   .00      1SG 
ATOM   1799  HB2 GLN   115      10.556  36.208  63.601  1.00   .00      1SG 
ATOM   1800  CG  GLN   115       8.816  37.277  64.318  1.00 29.63      1SG 
ATOM   1801  HG1 GLN   115       9.318  38.212  64.647  1.00   .00      1SG 
ATOM   1802  HG2 GLN   115       7.958  37.066  64.991  1.00   .00      1SG 
ATOM   1803  CD  GLN   115       8.281  37.496  62.933  1.00 36.13      1SG 
ATOM   1804  OE1 GLN   115       7.643  38.508  62.672  1.00 46.93      1SG 
ATOM   1805  NE2 GLN   115       8.522  36.558  62.039  1.00 34.74      1SG 
ATOM   1806 HE21 GLN   115       8.185  36.661  61.103  1.00   .00      1SG 
ATOM   1807 HE22 GLN   115       9.042  35.743  62.297  1.00   .00      1SG 
ATOM   1808  C   GLN   115      11.386  34.905  65.935  1.00 15.69      1SG 
ATOM   1809  O   GLN   115      12.516  34.867  65.465  1.00 12.66      1SG 
ATOM   1810  N   TYR   116      10.808  33.880  66.560  1.00 14.07      1SG 
ATOM   1811  HN  TYR   116       9.856  33.912  66.855  1.00   .00      1SG 
ATOM   1812  CA  TYR   116      11.521  32.650  66.854  1.00 13.16      1SG 
ATOM   1813  HA  TYR   116      12.440  32.633  66.288  1.00   .00      1SG 
ATOM   1814  CB  TYR   116      11.796  32.643  68.346  1.00 13.05      1SG 
ATOM   1815  HB1 TYR   116      10.845  32.434  68.880  1.00   .00      1SG 
ATOM   1816  HB2 TYR   116      12.188  33.640  68.638  1.00   .00      1SG 
ATOM   1817  CG  TYR   116      12.786  31.639  68.836  1.00 14.43      1SG 
ATOM   1818  CD1 TYR   116      14.077  32.031  69.218  1.00 18.42      1SG 
ATOM   1819  HD1 TYR   116      14.385  33.058  69.087  1.00   .00      1SG 
ATOM   1820  CE1 TYR   116      14.975  31.099  69.771  1.00 18.60      1SG 
ATOM   1821  HE1 TYR   116      15.963  31.405  70.081  1.00   .00      1SG 
ATOM   1822  CZ  TYR   116      14.565  29.772  69.911  1.00 19.55      1SG 
ATOM   1823  OH  TYR   116      15.391  28.807  70.440  1.00 21.95      1SG 
ATOM   1824  HH  TYR   116      16.078  29.249  70.944  1.00   .00      1SG 
ATOM   1825  CD2 TYR   116      12.417  30.317  68.992  1.00 16.52      1SG 
ATOM   1826  HD2 TYR   116      11.425  30.008  68.698  1.00   .00      1SG 
ATOM   1827  CE2 TYR   116      13.285  29.386  69.513  1.00 19.27      1SG 
ATOM   1828  HE2 TYR   116      12.976  28.356  69.614  1.00   .00      1SG 
ATOM   1829  C   TYR   116      10.601  31.502  66.484  1.00 15.81      1SG 
ATOM   1830  O   TYR   116       9.401  31.562  66.755  1.00 15.44      1SG 
ATOM   1831  N   ALA   117      11.163  30.471  65.866  1.00 13.44      1SG 
ATOM   1832  HN  ALA   117      12.140  30.441  65.670  1.00   .00      1SG 
ATOM   1833  CA  ALA   117      10.391  29.317  65.434  1.00 13.02      1SG 
ATOM   1834  HA  ALA   117       9.414  29.377  65.890  1.00   .00      1SG 
ATOM   1835  CB  ALA   117      10.266  29.301  63.882  1.00 13.75      1SG 
ATOM   1836  HB1 ALA   117      11.267  29.431  63.417  1.00   .00      1SG 
ATOM   1837  HB2 ALA   117       9.608  30.131  63.547  1.00   .00      1SG 
ATOM   1838  HB3 ALA   117       9.843  28.330  63.547  1.00   .00      1SG 
ATOM   1839  C   ALA   117      11.093  28.044  65.867  1.00 15.44      1SG 
ATOM   1840  O   ALA   117      12.327  28.003  65.940  1.00 11.98      1SG 
ATOM   1841  N   TYR   118      10.285  27.010  66.104  1.00 12.60      1SG 
ATOM   1842  HN  TYR   118       9.294  27.100  66.047  1.00   .00      1SG 
ATOM   1843  CA  TYR   118      10.772  25.689  66.459  1.00 11.47      1SG 
ATOM   1844  HA  TYR   118      11.843  25.682  66.322  1.00   .00      1SG 
ATOM   1845  CB  TYR   118      10.421  25.343  67.913  1.00 10.77      1SG 
ATOM   1846  HB1 TYR   118       9.319  25.253  68.024  1.00   .00      1SG 
ATOM   1847  HB2 TYR   118      10.810  26.131  68.592  1.00   .00      1SG 
ATOM   1848  CG  TYR   118      11.041  24.019  68.332  1.00 10.75      1SG 
ATOM   1849  CD1 TYR   118      12.395  23.746  68.115  1.00 15.46      1SG 
ATOM   1850  HD1 TYR   118      13.005  24.481  67.611  1.00   .00      1SG 
ATOM   1851  CE1 TYR   118      12.991  22.526  68.541  1.00 14.33      1SG 
ATOM   1852  HE1 TYR   118      14.041  22.343  68.367  1.00   .00      1SG 
ATOM   1853  CZ  TYR   118      12.206  21.566  69.186  1.00 15.63      1SG 
ATOM   1854  OH  TYR   118      12.786  20.378  69.617  1.00 14.65      1SG 
ATOM   1855  HH  TYR   118      12.115  19.692  69.586  1.00   .00      1SG 
ATOM   1856  CD2 TYR   118      10.262  23.035  68.975  1.00 14.81      1SG 
ATOM   1857  HD2 TYR   118       9.210  23.213  69.144  1.00   .00      1SG 
ATOM   1858  CE2 TYR   118      10.846  21.810  69.404  1.00 16.32      1SG 
ATOM   1859  HE2 TYR   118      10.238  21.067  69.899  1.00   .00      1SG 
ATOM   1860  C   TYR   118      10.079  24.731  65.487  1.00 13.04      1SG 
ATOM   1861  O   TYR   118       8.850  24.756  65.306  1.00 13.20      1SG 
ATOM   1862  N   ASP   119      10.901  23.921  64.830  1.00 11.01      1SG 
ATOM   1863  HN  ASP   119      11.884  23.933  64.994  1.00   .00      1SG 
ATOM   1864  CA  ASP   119      10.446  22.967  63.835  1.00 12.65      1SG 
ATOM   1865  HA  ASP   119      11.299  22.664  63.246  1.00   .00      1SG 
ATOM   1866  CB  ASP   119       9.808  21.754  64.510  1.00 15.96      1SG 
ATOM   1867  HB1 ASP   119       9.287  21.140  63.745  1.00   .00      1SG 
ATOM   1868  HB2 ASP   119       9.070  22.099  65.265  1.00   .00      1SG 
ATOM   1869  CG  ASP   119      10.867  20.883  65.211  1.00 19.90      1SG 
ATOM   1870  OD1 ASP   119      12.039  20.865  64.732  1.00 17.89      1SG 
ATOM   1871  OD2 ASP   119      10.534  20.216  66.209  1.00 20.32      1SG 
ATOM   1872  C   ASP   119       9.525  23.549  62.771  1.00 15.26      1SG 
ATOM   1873  O   ASP   119       8.529  22.941  62.401  1.00 15.48      1SG 
ATOM   1874  N   GLY   120       9.890  24.740  62.292  1.00 12.98      1SG 
ATOM   1875  HN  GLY   120      10.665  25.251  62.656  1.00   .00      1SG 
ATOM   1876  CA  GLY   120       9.162  25.355  61.202  1.00 15.59      1SG 
ATOM   1877  HA1 GLY   120       8.924  24.563  60.508  1.00   .00      1SG 
ATOM   1878  HA2 GLY   120       9.836  26.063  60.745  1.00   .00      1SG 
ATOM   1879  C   GLY   120       7.887  26.080  61.520  1.00 17.73      1SG 
ATOM   1880  O   GLY   120       7.210  26.552  60.606  1.00 17.95      1SG 
ATOM   1881  N   LYS   121       7.564  26.189  62.801  1.00 13.60      1SG 
ATOM   1882  HN  LYS   121       8.126  25.813  63.534  1.00   .00      1SG 
ATOM   1883  CA  LYS   121       6.339  26.884  63.199  1.00 17.22      1SG 
ATOM   1884  HA  LYS   121       5.889  27.307  62.313  1.00   .00      1SG 
ATOM   1885  CB  LYS   121       5.366  25.904  63.879  1.00 19.59      1SG 
ATOM   1886  HB1 LYS   121       4.552  26.491  64.354  1.00   .00      1SG 
ATOM   1887  HB2 LYS   121       5.919  25.351  64.668  1.00   .00      1SG 
ATOM   1888  CG  LYS   121       4.744  24.899  62.938  1.00 35.03      1SG 
ATOM   1889  HG1 LYS   121       5.549  24.322  62.435  1.00   .00      1SG 
ATOM   1890  HG2 LYS   121       4.152  25.437  62.167  1.00   .00      1SG 
ATOM   1891  CD  LYS   121       3.823  23.928  63.697  1.00 36.74      1SG 
ATOM   1892  HD1 LYS   121       4.434  23.333  64.409  1.00   .00      1SG 
ATOM   1893  HD2 LYS   121       3.347  23.238  62.968  1.00   .00      1SG 
ATOM   1894  CE  LYS   121       2.728  24.664  64.474  1.00 41.59      1SG 
ATOM   1895  HE1 LYS   121       3.195  25.312  65.245  1.00   .00      1SG 
ATOM   1896  HE2 LYS   121       2.055  23.922  64.955  1.00   .00      1SG 
ATOM   1897  NZ  LYS   121       1.876  25.545  63.603  1.00 47.79      1SG 
ATOM   1898  HZ1 LYS   121       1.410  24.967  62.875  1.00   .00      1SG 
ATOM   1899  HZ2 LYS   121       2.474  26.263  63.146  1.00   .00      1SG 
ATOM   1900  HZ3 LYS   121       1.155  26.015  64.186  1.00   .00      1SG 
ATOM   1901  C   LYS   121       6.650  27.972  64.187  1.00 13.52      1SG 
ATOM   1902  O   LYS   121       7.620  27.866  64.961  1.00 12.82      1SG 
ATOM   1903  N   ASP   122       5.830  29.020  64.185  1.00 13.92      1SG 
ATOM   1904  HN  ASP   122       5.079  29.126  63.538  1.00   .00      1SG 
ATOM   1905  CA  ASP   122       6.022  30.088  65.178  1.00 13.92      1SG 
ATOM   1906  HA  ASP   122       6.929  30.617  64.926  1.00   .00      1SG 
ATOM   1907  CB  ASP   122       4.846  31.044  65.190  1.00 19.76      1SG 
ATOM   1908  HB1 ASP   122       4.909  31.680  66.099  1.00   .00      1SG 
ATOM   1909  HB2 ASP   122       3.904  30.456  65.221  1.00   .00      1SG 
ATOM   1910  CG  ASP   122       4.807  31.951  63.970  1.00 25.36      1SG 
ATOM   1911  OD1 ASP   122       5.839  32.099  63.290  1.00 22.93      1SG 
ATOM   1912  OD2 ASP   122       3.747  32.539  63.717  1.00 24.03      1SG 
ATOM   1913  C   ASP   122       6.121  29.499  66.577  1.00 16.81      1SG 
ATOM   1914  O   ASP   122       5.361  28.581  66.919  1.00 17.62      1SG 
ATOM   1915  N   TYR   123       7.040  30.028  67.390  1.00 11.94      1SG 
ATOM   1916  HN  TYR   123       7.661  30.748  67.090  1.00   .00      1SG 
ATOM   1917  CA  TYR   123       7.193  29.583  68.775  1.00 13.71      1SG 
ATOM   1918  HA  TYR   123       6.469  28.803  68.955  1.00   .00      1SG 
ATOM   1919  CB  TYR   123       8.610  29.060  69.032  1.00 13.24      1SG 
ATOM   1920  HB1 TYR   123       9.348  29.861  68.814  1.00   .00      1SG 
ATOM   1921  HB2 TYR   123       8.804  28.176  68.387  1.00   .00      1SG 
ATOM   1922  CG  TYR   123       8.811  28.633  70.462  1.00 14.55      1SG 
ATOM   1923  CD1 TYR   123       8.202  27.479  70.963  1.00 11.43      1SG 
ATOM   1924  HD1 TYR   123       7.588  26.875  70.311  1.00   .00      1SG 
ATOM   1925  CE1 TYR   123       8.377  27.096  72.299  1.00 14.12      1SG 
ATOM   1926  HE1 TYR   123       7.916  26.192  72.669  1.00   .00      1SG 
ATOM   1927  CZ  TYR   123       9.149  27.888  73.148  1.00 15.52      1SG 
ATOM   1928  OH  TYR   123       9.342  27.535  74.465  1.00 15.20      1SG 
ATOM   1929  HH  TYR   123       9.312  26.577  74.523  1.00   .00      1SG 
ATOM   1930  CD2 TYR   123       9.585  29.403  71.328  1.00 14.16      1SG 
ATOM   1931  HD2 TYR   123      10.068  30.294  70.955  1.00   .00      1SG 
ATOM   1932  CE2 TYR   123       9.749  29.044  72.674  1.00 16.20      1SG 
ATOM   1933  HE2 TYR   123      10.338  29.663  73.335  1.00   .00      1SG 
ATOM   1934  C   TYR   123       6.912  30.813  69.660  1.00 15.51      1SG 
ATOM   1935  O   TYR   123       6.033  30.782  70.520  1.00 16.65      1SG 
ATOM   1936  N   ILE   124       7.636  31.907  69.442  1.00 12.27      1SG 
ATOM   1937  HN  ILE   124       8.371  31.950  68.770  1.00   .00      1SG 
ATOM   1938  CA  ILE   124       7.361  33.122  70.213  1.00 13.72      1SG 
ATOM   1939  HA  ILE   124       6.290  33.205  70.320  1.00   .00      1SG 
ATOM   1940  CB  ILE   124       8.043  33.097  71.637  1.00 12.73      1SG 
ATOM   1941  HB  ILE   124       7.775  32.151  72.155  1.00   .00      1SG 
ATOM   1942  CG2 ILE   124       9.610  33.195  71.511  1.00 14.19      1SG 
ATOM   1943 HG21 ILE   124       9.903  34.211  71.170  1.00   .00      1SG 
ATOM   1944 HG22 ILE   124       9.977  32.453  70.770  1.00   .00      1SG 
ATOM   1945 HG23 ILE   124      10.082  33.003  72.498  1.00   .00      1SG 
ATOM   1946  CG1 ILE   124       7.541  34.282  72.484  1.00 16.41      1SG 
ATOM   1947 HG11 ILE   124       6.431  34.308  72.450  1.00   .00      1SG 
ATOM   1948 HG12 ILE   124       7.936  35.228  72.055  1.00   .00      1SG 
ATOM   1949  CD  ILE   124       8.000  34.164  73.960  1.00 17.47      1SG 
ATOM   1950  HD1 ILE   124       9.110  34.147  74.015  1.00   .00      1SG 
ATOM   1951  HD2 ILE   124       7.609  33.224  74.404  1.00   .00      1SG 
ATOM   1952  HD3 ILE   124       7.629  35.035  74.542  1.00   .00      1SG 
ATOM   1953  C   ILE   124       7.852  34.284  69.382  1.00 16.30      1SG 
ATOM   1954  O   ILE   124       8.822  34.163  68.649  1.00 15.08      1SG 
ATOM   1955  N   ALA   125       7.141  35.399  69.462  1.00 13.46      1SG 
ATOM   1956  HN  ALA   125       6.336  35.479  70.044  1.00   .00      1SG 
ATOM   1957  CA  ALA   125       7.506  36.584  68.690  1.00 16.21      1SG 
ATOM   1958  HA  ALA   125       8.563  36.535  68.472  1.00   .00      1SG 
ATOM   1959  CB  ALA   125       6.686  36.624  67.387  1.00 20.12      1SG 
ATOM   1960  HB1 ALA   125       5.600  36.662  67.620  1.00   .00      1SG 
ATOM   1961  HB2 ALA   125       6.888  35.712  66.785  1.00   .00      1SG 
ATOM   1962  HB3 ALA   125       6.954  37.527  66.799  1.00   .00      1SG 
ATOM   1963  C   ALA   125       7.213  37.834  69.500  1.00 17.69      1SG 
ATOM   1964  O   ALA   125       6.293  37.864  70.319  1.00 14.88      1SG 
ATOM   1965  N   LEU   126       7.997  38.865  69.253  1.00 19.59      1SG 
ATOM   1966  HN  LEU   126       8.760  38.812  68.614  1.00   .00      1SG 
ATOM   1967  CA  LEU   126       7.792  40.144  69.902  1.00 19.85      1SG 
ATOM   1968  HA  LEU   126       7.564  39.970  70.943  1.00   .00      1SG 
ATOM   1969  CB  LEU   126       9.064  40.968  69.757  1.00 20.93      1SG 
ATOM   1970  HB1 LEU   126       9.141  41.239  68.685  1.00   .00      1SG 
ATOM   1971  HB2 LEU   126       9.904  40.297  70.025  1.00   .00      1SG 
ATOM   1972  CG  LEU   126       9.273  42.244  70.536  1.00 22.74      1SG 
ATOM   1973  HG  LEU   126       8.546  43.009  70.191  1.00   .00      1SG 
ATOM   1974  CD1 LEU   126       9.077  41.998  72.033  1.00 16.41      1SG 
ATOM   1975 HD11 LEU   126       9.804  41.240  72.394  1.00   .00      1SG 
ATOM   1976 HD12 LEU   126       8.049  41.622  72.223  1.00   .00      1SG 
ATOM   1977 HD13 LEU   126       9.240  42.942  72.596  1.00   .00      1SG 
ATOM   1978  CD2 LEU   126      10.708  42.731  70.209  1.00 18.61      1SG 
ATOM   1979 HD21 LEU   126      10.809  42.917  69.118  1.00   .00      1SG 
ATOM   1980 HD22 LEU   126      11.447  41.957  70.506  1.00   .00      1SG 
ATOM   1981 HD23 LEU   126      10.919  43.677  70.752  1.00   .00      1SG 
ATOM   1982  C   LEU   126       6.662  40.779  69.096  1.00 21.27      1SG 
ATOM   1983  O   LEU   126       6.614  40.635  67.876  1.00 20.84      1SG 
ATOM   1984  N   LYS   127       5.737  41.459  69.773  1.00 19.95      1SG 
ATOM   1985  HN  LYS   127       5.755  41.550  70.766  1.00   .00      1SG 
ATOM   1986  CA  LYS   127       4.635  42.113  69.074  1.00 22.27      1SG 
ATOM   1987  HA  LYS   127       4.323  41.468  68.266  1.00   .00      1SG 
ATOM   1988  CB  LYS   127       3.460  42.377  70.028  1.00 19.51      1SG 
ATOM   1989  HB1 LYS   127       2.684  42.962  69.491  1.00   .00      1SG 
ATOM   1990  HB2 LYS   127       3.824  42.972  70.892  1.00   .00      1SG 
ATOM   1991  CG  LYS   127       2.842  41.094  70.540  1.00 27.39      1SG 
ATOM   1992  HG1 LYS   127       3.471  40.682  71.358  1.00   .00      1SG 
ATOM   1993  HG2 LYS   127       2.795  40.352  69.715  1.00   .00      1SG 
ATOM   1994  CD  LYS   127       1.449  41.355  71.060  1.00 35.29      1SG 
ATOM   1995  HD1 LYS   127        .714  41.183  70.245  1.00   .00      1SG 
ATOM   1996  HD2 LYS   127       1.373  42.412  71.395  1.00   .00      1SG 
ATOM   1997  CE  LYS   127       1.132  40.436  72.224  1.00 40.23      1SG 
ATOM   1998  HE1 LYS   127       1.917  40.526  73.005  1.00   .00      1SG 
ATOM   1999  HE2 LYS   127       1.063  39.385  71.871  1.00   .00      1SG 
ATOM   2000  NZ  LYS   127       -.193  40.809  72.847  1.00 41.46      1SG 
ATOM   2001  HZ1 LYS   127       -.947  40.725  72.136  1.00   .00      1SG 
ATOM   2002  HZ2 LYS   127       -.150  41.789  73.193  1.00   .00      1SG 
ATOM   2003  HZ3 LYS   127       -.394  40.170  73.642  1.00   .00      1SG 
ATOM   2004  C   LYS   127       5.125  43.412  68.486  1.00 20.68      1SG 
ATOM   2005  O   LYS   127       6.201  43.892  68.833  1.00 23.01      1SG 
ATOM   2006  N   GLU   128       4.332  44.008  67.603  1.00 28.53      1SG 
ATOM   2007  HN  GLU   128       3.432  43.662  67.350  1.00   .00      1SG 
ATOM   2008  CA  GLU   128       4.785  45.230  66.962  1.00 27.09      1SG 
ATOM   2009  HA  GLU   128       5.753  45.037  66.524  1.00   .00      1SG 
ATOM   2010  CB  GLU   128       3.801  45.680  65.889  1.00 32.72      1SG 
ATOM   2011  HB1 GLU   128       3.020  46.321  66.350  1.00   .00      1SG 
ATOM   2012  HB2 GLU   128       3.314  44.789  65.437  1.00   .00      1SG 
ATOM   2013  CG  GLU   128       4.531  46.471  64.797  1.00 44.96      1SG 
ATOM   2014  HG1 GLU   128       5.271  45.802  64.309  1.00   .00      1SG 
ATOM   2015  HG2 GLU   128       5.065  47.321  65.272  1.00   .00      1SG 
ATOM   2016  CD  GLU   128       3.616  47.028  63.722  1.00 54.12      1SG 
ATOM   2017  OE1 GLU   128       2.774  46.265  63.179  1.00 58.11      1SG 
ATOM   2018  OE2 GLU   128       3.755  48.233  63.411  1.00 57.19      1SG 
ATOM   2019  C   GLU   128       5.068  46.364  67.929  1.00 27.25      1SG 
ATOM   2020  O   GLU   128       5.871  47.255  67.625  1.00 26.28      1SG 
ATOM   2021  N   ASP   129       4.445  46.352  69.105  1.00 24.85      1SG 
ATOM   2022  HN  ASP   129       3.789  45.654  69.383  1.00   .00      1SG 
ATOM   2023  CA  ASP   129       4.743  47.433  70.049  1.00 26.31      1SG 
ATOM   2024  HA  ASP   129       4.834  48.350  69.486  1.00   .00      1SG 
ATOM   2025  CB  ASP   129       3.637  47.568  71.107  1.00 32.48      1SG 
ATOM   2026  HB1 ASP   129       2.655  47.624  70.591  1.00   .00      1SG 
ATOM   2027  HB2 ASP   129       3.803  48.506  71.678  1.00   .00      1SG 
ATOM   2028  CG  ASP   129       3.591  46.414  72.092  1.00 35.40      1SG 
ATOM   2029  OD1 ASP   129       4.317  45.411  71.933  1.00 31.81      1SG 
ATOM   2030  OD2 ASP   129       2.791  46.515  73.048  1.00 41.44      1SG 
ATOM   2031  C   ASP   129       6.114  47.240  70.708  1.00 24.22      1SG 
ATOM   2032  O   ASP   129       6.612  48.115  71.428  1.00 23.68      1SG 
ATOM   2033  N   LEU   130       6.738  46.093  70.441  1.00 24.56      1SG 
ATOM   2034  HN  LEU   130       6.341  45.396  69.849  1.00   .00      1SG 
ATOM   2035  CA  LEU   130       8.058  45.788  71.010  1.00 18.89      1SG 
ATOM   2036  HA  LEU   130       8.315  44.775  70.737  1.00   .00      1SG 
ATOM   2037  CB  LEU   130       9.118  46.773  70.474  1.00 21.65      1SG 
ATOM   2038  HB1 LEU   130      10.120  46.391  70.762  1.00   .00      1SG 
ATOM   2039  HB2 LEU   130       8.953  47.756  70.962  1.00   .00      1SG 
ATOM   2040  CG  LEU   130       9.110  46.991  68.941  1.00 24.09      1SG 
ATOM   2041  HG  LEU   130       8.174  47.511  68.645  1.00   .00      1SG 
ATOM   2042  CD1 LEU   130      10.338  47.852  68.521  1.00 23.83      1SG 
ATOM   2043 HD11 LEU   130      11.280  47.338  68.807  1.00   .00      1SG 
ATOM   2044 HD12 LEU   130      10.302  48.837  69.033  1.00   .00      1SG 
ATOM   2045 HD13 LEU   130      10.336  48.002  67.420  1.00   .00      1SG 
ATOM   2046  CD2 LEU   130       9.143  45.651  68.215  1.00 21.02      1SG 
ATOM   2047 HD21 LEU   130       8.255  45.044  68.493  1.00   .00      1SG 
ATOM   2048 HD22 LEU   130      10.059  45.090  68.498  1.00   .00      1SG 
ATOM   2049 HD23 LEU   130       9.130  45.816  67.116  1.00   .00      1SG 
ATOM   2050  C   LEU   130       8.073  45.805  72.544  1.00 19.60      1SG 
ATOM   2051  O   LEU   130       9.104  46.036  73.140  1.00 20.38      1SG 
ATOM   2052  N   ARG   131       6.929  45.519  73.168  1.00 20.98      1SG 
ATOM   2053  HN  ARG   131       6.095  45.294  72.671  1.00   .00      1SG 
ATOM   2054  CA  ARG   131       6.832  45.519  74.627  1.00 26.50      1SG 
ATOM   2055  HA  ARG   131       7.833  45.501  75.032  1.00   .00      1SG 
ATOM   2056  CB  ARG   131       6.079  46.777  75.103  1.00 28.66      1SG 
ATOM   2057  HB1 ARG   131       5.976  46.725  76.207  1.00   .00      1SG 
ATOM   2058  HB2 ARG   131       5.067  46.771  74.646  1.00   .00      1SG 
ATOM   2059  CG  ARG   131       6.751  48.080  74.750  1.00 35.34      1SG 
ATOM   2060  HG1 ARG   131       7.210  47.990  73.742  1.00   .00      1SG 
ATOM   2061  HG2 ARG   131       7.551  48.288  75.492  1.00   .00      1SG 
ATOM   2062  CD  ARG   131       5.760  49.245  74.745  1.00 40.41      1SG 
ATOM   2063  HD1 ARG   131       5.518  49.546  75.786  1.00   .00      1SG 
ATOM   2064  HD2 ARG   131       4.833  48.957  74.205  1.00   .00      1SG 
ATOM   2065  NE  ARG   131       6.347  50.393  74.063  1.00 48.26      1SG 
ATOM   2066  HE  ARG   131       6.073  50.570  73.118  1.00   .00      1SG 
ATOM   2067  CZ  ARG   131       7.224  51.217  74.625  1.00 53.12      1SG 
ATOM   2068  NH1 ARG   131       7.592  51.018  75.884  1.00 56.30      1SG 
ATOM   2069 HH11 ARG   131       7.210  50.253  76.402  1.00   .00      1SG 
ATOM   2070 HH12 ARG   131       8.252  51.633  76.315  1.00   .00      1SG 
ATOM   2071  NH2 ARG   131       7.758  52.214  73.924  1.00 51.08      1SG 
ATOM   2072 HH21 ARG   131       7.500  52.347  72.967  1.00   .00      1SG 
ATOM   2073 HH22 ARG   131       8.418  52.830  74.354  1.00   .00      1SG 
ATOM   2074  C   ARG   131       6.089  44.291  75.165  1.00 27.49      1SG 
ATOM   2075  O   ARG   131       5.855  44.176  76.371  1.00 26.53      1SG 
ATOM   2076  N   SER   132       5.700  43.387  74.280  1.00 21.40      1SG 
ATOM   2077  HN  SER   132       5.891  43.465  73.305  1.00   .00      1SG 
ATOM   2078  CA  SER   132       4.956  42.211  74.716  1.00 24.83      1SG 
ATOM   2079  HA  SER   132       5.345  41.902  75.675  1.00   .00      1SG 
ATOM   2080  CB  SER   132       3.456  42.547  74.826  1.00 27.77      1SG 
ATOM   2081  HB1 SER   132       3.310  43.350  75.580  1.00   .00      1SG 
ATOM   2082  HB2 SER   132       2.895  41.640  75.138  1.00   .00      1SG 
ATOM   2083  OG  SER   132       2.937  42.995  73.582  1.00 30.54      1SG 
ATOM   2084  HG1 SER   132       3.324  43.860  73.430  1.00   .00      1SG 
ATOM   2085  C   SER   132       5.178  41.068  73.726  1.00 21.90      1SG 
ATOM   2086  O   SER   132       5.609  41.285  72.597  1.00 20.97      1SG 
ATOM   2087  N   TRP   133       4.850  39.859  74.153  1.00 21.39      1SG 
ATOM   2088  HN  TRP   133       4.421  39.703  75.039  1.00   .00      1SG 
ATOM   2089  CA  TRP   133       5.101  38.687  73.345  1.00 20.14      1SG 
ATOM   2090  HA  TRP   133       5.583  38.998  72.430  1.00   .00      1SG 
ATOM   2091  CB  TRP   133       6.002  37.723  74.136  1.00 16.31      1SG 
ATOM   2092  HB1 TRP   133       6.260  36.863  73.482  1.00   .00      1SG 
ATOM   2093  HB2 TRP   133       5.437  37.355  75.018  1.00   .00      1SG 
ATOM   2094  CG  TRP   133       7.277  38.335  74.623  1.00 19.35      1SG 
ATOM   2095  CD1 TRP   133       7.507  38.922  75.835  1.00 18.46      1SG 
ATOM   2096  HD1 TRP   133       6.771  39.041  76.616  1.00   .00      1SG 
ATOM   2097  NE1 TRP   133       8.814  39.339  75.913  1.00 21.89      1SG 
ATOM   2098  HE1 TRP   133       9.223  39.782  76.680  1.00   .00      1SG 
ATOM   2099  CE2 TRP   133       9.451  39.031  74.737  1.00 19.46      1SG 
ATOM   2100  CD2 TRP   133       8.508  38.398  73.900  1.00 16.38      1SG 
ATOM   2101  CE3 TRP   133       8.904  37.978  72.621  1.00 18.92      1SG 
ATOM   2102  HE3 TRP   133       8.215  37.494  71.945  1.00   .00      1SG 
ATOM   2103  CZ3 TRP   133      10.224  38.196  72.223  1.00 17.86      1SG 
ATOM   2104  HZ3 TRP   133      10.544  37.876  71.242  1.00   .00      1SG 
ATOM   2105  CZ2 TRP   133      10.777  39.252  74.343  1.00 18.88      1SG 
ATOM   2106  HZ2 TRP   133      11.497  39.735  74.987  1.00   .00      1SG 
ATOM   2107  CH2 TRP   133      11.146  38.828  73.084  1.00 17.73      1SG 
ATOM   2108  HH2 TRP   133      12.161  38.983  72.750  1.00   .00      1SG 
ATOM   2109  C   TRP   133       3.867  37.908  72.967  1.00 21.56      1SG 
ATOM   2110  O   TRP   133       2.870  37.917  73.689  1.00 19.69      1SG 
ATOM   2111  N   THR   134       3.969  37.199  71.847  1.00 18.34      1SG 
ATOM   2112  HN  THR   134       4.773  37.244  71.259  1.00   .00      1SG 
ATOM   2113  CA  THR   134       2.907  36.314  71.416  1.00 21.36      1SG 
ATOM   2114  HA  THR   134       2.067  36.470  72.076  1.00   .00      1SG 
ATOM   2115  CB  THR   134       2.487  36.560  69.986  1.00 26.76      1SG 
ATOM   2116  HB  THR   134       3.368  36.491  69.312  1.00   .00      1SG 
ATOM   2117  OG1 THR   134       1.925  37.867  69.891  1.00 33.21      1SG 
ATOM   2118  HG1 THR   134       1.821  38.043  68.953  1.00   .00      1SG 
ATOM   2119  CG2 THR   134       1.433  35.517  69.564  1.00 25.73      1SG 
ATOM   2120 HG21 THR   134        .623  35.464  70.323  1.00   .00      1SG 
ATOM   2121 HG22 THR   134       1.905  34.515  69.479  1.00   .00      1SG 
ATOM   2122 HG23 THR   134        .987  35.804  68.588  1.00   .00      1SG 
ATOM   2123  C   THR   134       3.526  34.923  71.473  1.00 23.06      1SG 
ATOM   2124  O   THR   134       4.465  34.651  70.734  1.00 20.06      1SG 
ATOM   2125  N   ALA   135       3.001  34.063  72.343  1.00 21.15      1SG 
ATOM   2126  HN  ALA   135       2.239  34.313  72.935  1.00   .00      1SG 
ATOM   2127  CA  ALA   135       3.502  32.696  72.493  1.00 21.16      1SG 
ATOM   2128  HA  ALA   135       4.480  32.645  72.038  1.00   .00      1SG 
ATOM   2129  CB  ALA   135       3.582  32.319  73.965  1.00 25.00      1SG 
ATOM   2130  HB1 ALA   135       2.621  32.553  74.472  1.00   .00      1SG 
ATOM   2131  HB2 ALA   135       4.393  32.895  74.459  1.00   .00      1SG 
ATOM   2132  HB3 ALA   135       3.780  31.231  74.066  1.00   .00      1SG 
ATOM   2133  C   ALA   135       2.566  31.742  71.749  1.00 25.89      1SG 
ATOM   2134  O   ALA   135       1.342  31.787  71.907  1.00 22.60      1SG 
ATOM   2135  N   ALA   136       3.155  30.852  70.958  1.00 21.50      1SG 
ATOM   2136  HN  ALA   136       4.146  30.764  70.901  1.00   .00      1SG 
ATOM   2137  CA  ALA   136       2.377  29.946  70.122  1.00 28.05      1SG 
ATOM   2138  HA  ALA   136       1.613  30.518  69.616  1.00   .00      1SG 
ATOM   2139  CB  ALA   136       3.322  29.267  69.098  1.00 22.85      1SG 
ATOM   2140  HB1 ALA   136       4.111  28.693  69.629  1.00   .00      1SG 
ATOM   2141  HB2 ALA   136       3.810  30.038  68.465  1.00   .00      1SG 
ATOM   2142  HB3 ALA   136       2.745  28.567  68.457  1.00   .00      1SG 
ATOM   2143  C   ALA   136       1.541  28.889  70.833  1.00 26.15      1SG 
ATOM   2144  O   ALA   136        .442  28.535  70.390  1.00 24.87      1SG 
ATOM   2145  N   ASP   137       2.070  28.353  71.915  1.00 19.54      1SG 
ATOM   2146  HN  ASP   137       2.954  28.634  72.280  1.00   .00      1SG 
ATOM   2147  CA  ASP   137       1.370  27.312  72.630  1.00 22.22      1SG 
ATOM   2148  HA  ASP   137        .311  27.514  72.569  1.00   .00      1SG 
ATOM   2149  CB  ASP   137       1.691  25.948  72.014  1.00 26.01      1SG 
ATOM   2150  HB1 ASP   137       1.364  25.945  70.953  1.00   .00      1SG 
ATOM   2151  HB2 ASP   137       1.136  25.162  72.569  1.00   .00      1SG 
ATOM   2152  CG  ASP   137       3.185  25.615  72.063  1.00 26.90      1SG 
ATOM   2153  OD1 ASP   137       3.916  26.238  72.854  1.00 28.03      1SG 
ATOM   2154  OD2 ASP   137       3.623  24.723  71.314  1.00 26.59      1SG 
ATOM   2155  C   ASP   137       1.722  27.302  74.111  1.00 22.13      1SG 
ATOM   2156  O   ASP   137       2.382  28.220  74.629  1.00 19.23      1SG 
ATOM   2157  N   MET   138       1.304  26.248  74.800  1.00 21.70      1SG 
ATOM   2158  HN  MET   138        .795  25.496  74.388  1.00   .00      1SG 
ATOM   2159  CA  MET   138       1.587  26.153  76.239  1.00 21.11      1SG 
ATOM   2160  HA  MET   138       1.246  27.062  76.712  1.00   .00      1SG 
ATOM   2161  CB  MET   138        .869  24.942  76.826  1.00 25.26      1SG 
ATOM   2162  HB1 MET   138       1.277  24.737  77.838  1.00   .00      1SG 
ATOM   2163  HB2 MET   138       1.058  24.061  76.177  1.00   .00      1SG 
ATOM   2164  CG  MET   138       -.608  25.159  76.932  1.00 31.90      1SG 
ATOM   2165  HG1 MET   138      -1.117  24.198  77.158  1.00   .00      1SG 
ATOM   2166  HG2 MET   138      -1.004  25.543  75.968  1.00   .00      1SG 
ATOM   2167  SD  MET   138       -.874  26.342  78.245  1.00 40.91      1SG 
ATOM   2168  CE  MET   138       -.448  25.179  79.777  1.00 32.94      1SG 
ATOM   2169  HE1 MET   138        .637  24.943  79.815  1.00   .00      1SG 
ATOM   2170  HE2 MET   138      -1.005  24.221  79.698  1.00   .00      1SG 
ATOM   2171  HE3 MET   138       -.723  25.682  80.729  1.00   .00      1SG 
ATOM   2172  C   MET   138       3.053  26.086  76.590  1.00 21.76      1SG 
ATOM   2173  O   MET   138       3.496  26.669  77.594  1.00 19.68      1SG 
ATOM   2174  N   ALA   139       3.827  25.366  75.791  1.00 20.76      1SG 
ATOM   2175  HN  ALA   139       3.489  24.876  74.991  1.00   .00      1SG 
ATOM   2176  CA  ALA   139       5.254  25.277  76.085  1.00 21.90      1SG 
ATOM   2177  HA  ALA   139       5.366  24.959  77.111  1.00   .00      1SG 
ATOM   2178  CB  ALA   139       5.931  24.286  75.146  1.00 23.81      1SG 
ATOM   2179  HB1 ALA   139       5.805  24.612  74.091  1.00   .00      1SG 
ATOM   2180  HB2 ALA   139       5.473  23.281  75.263  1.00   .00      1SG 
ATOM   2181  HB3 ALA   139       7.017  24.231  75.373  1.00   .00      1SG 
ATOM   2182  C   ALA   139       5.905  26.655  75.949  1.00 19.12      1SG 
ATOM   2183  O   ALA   139       6.729  27.057  76.781  1.00 20.80      1SG 
ATOM   2184  N   ALA   140       5.542  27.382  74.901  1.00 15.85      1SG 
ATOM   2185  HN  ALA   140       4.876  27.064  74.231  1.00   .00      1SG 
ATOM   2186  CA  ALA   140       6.110  28.697  74.681  1.00 18.09      1SG 
ATOM   2187  HA  ALA   140       7.185  28.613  74.739  1.00   .00      1SG 
ATOM   2188  CB  ALA   140       5.695  29.228  73.328  1.00 18.56      1SG 
ATOM   2189  HB1 ALA   140       4.611  29.474  73.330  1.00   .00      1SG 
ATOM   2190  HB2 ALA   140       5.883  28.461  72.547  1.00   .00      1SG 
ATOM   2191  HB3 ALA   140       6.267  30.151  73.092  1.00   .00      1SG 
ATOM   2192  C   ALA   140       5.711  29.674  75.764  1.00 22.19      1SG 
ATOM   2193  O   ALA   140       6.364  30.707  75.944  1.00 16.23      1SG 
ATOM   2194  N   GLN   141       4.609  29.388  76.467  1.00 21.77      1SG 
ATOM   2195  HN  GLN   141       4.031  28.597  76.282  1.00   .00      1SG 
ATOM   2196  CA  GLN   141       4.213  30.266  77.565  1.00 19.35      1SG 
ATOM   2197  HA  GLN   141       4.076  31.261  77.167  1.00   .00      1SG 
ATOM   2198  CB  GLN   141       2.906  29.761  78.211  1.00 21.82      1SG 
ATOM   2199  HB1 GLN   141       2.784  30.253  79.199  1.00   .00      1SG 
ATOM   2200  HB2 GLN   141       2.985  28.664  78.363  1.00   .00      1SG 
ATOM   2201  CG  GLN   141       1.678  30.048  77.370  1.00 29.92      1SG 
ATOM   2202  HG1 GLN   141        .801  29.536  77.821  1.00   .00      1SG 
ATOM   2203  HG2 GLN   141       1.841  29.656  76.343  1.00   .00      1SG 
ATOM   2204  CD  GLN   141       1.378  31.541  77.280  1.00 38.88      1SG 
ATOM   2205  OE1 GLN   141       1.607  32.285  78.237  1.00 43.30      1SG 
ATOM   2206  NE2 GLN   141        .842  31.982  76.138  1.00 44.52      1SG 
ATOM   2207 HE21 GLN   141        .656  31.342  75.393  1.00   .00      1SG 
ATOM   2208 HE22 GLN   141        .627  32.952  76.029  1.00   .00      1SG 
ATOM   2209  C   GLN   141       5.326  30.298  78.620  1.00 16.73      1SG 
ATOM   2210  O   GLN   141       5.520  31.317  79.301  1.00 17.45      1SG 
ATOM   2211  N   THR   142       6.028  29.175  78.797  1.00 15.76      1SG 
ATOM   2212  HN  THR   142       5.839  28.337  78.291  1.00   .00      1SG 
ATOM   2213  CA  THR   142       7.127  29.127  79.761  1.00 17.60      1SG 
ATOM   2214  HA  THR   142       6.739  29.434  80.721  1.00   .00      1SG 
ATOM   2215  CB  THR   142       7.729  27.702  79.859  1.00 22.58      1SG 
ATOM   2216  HB  THR   142       8.123  27.386  78.869  1.00   .00      1SG 
ATOM   2217  OG1 THR   142       6.708  26.793  80.268  1.00 24.72      1SG 
ATOM   2218  HG1 THR   142       7.078  25.914  80.161  1.00   .00      1SG 
ATOM   2219  CG2 THR   142       8.857  27.647  80.869  1.00 22.09      1SG 
ATOM   2220 HG21 THR   142       8.533  28.104  81.828  1.00   .00      1SG 
ATOM   2221 HG22 THR   142       9.735  28.210  80.486  1.00   .00      1SG 
ATOM   2222 HG23 THR   142       9.144  26.591  81.058  1.00   .00      1SG 
ATOM   2223  C   THR   142       8.231  30.112  79.374  1.00 17.48      1SG 
ATOM   2224  O   THR   142       8.781  30.829  80.226  1.00 16.56      1SG 
ATOM   2225  N   THR   143       8.560  30.165  78.082  1.00 15.76      1SG 
ATOM   2226  HN  THR   143       8.125  29.597  77.387  1.00   .00      1SG 
ATOM   2227  CA  THR   143       9.610  31.094  77.627  1.00 14.20      1SG 
ATOM   2228  HA  THR   143      10.468  30.977  78.272  1.00   .00      1SG 
ATOM   2229  CB  THR   143       9.993  30.777  76.141  1.00 14.61      1SG 
ATOM   2230  HB  THR   143       9.085  30.797  75.501  1.00   .00      1SG 
ATOM   2231  OG1 THR   143      10.585  29.463  76.082  1.00 16.89      1SG 
ATOM   2232  HG1 THR   143      11.362  29.497  76.645  1.00   .00      1SG 
ATOM   2233  CG2 THR   143      10.963  31.839  75.573  1.00 14.78      1SG 
ATOM   2234 HG21 THR   143      11.959  31.743  76.055  1.00   .00      1SG 
ATOM   2235 HG22 THR   143      10.568  32.858  75.775  1.00   .00      1SG 
ATOM   2236 HG23 THR   143      11.083  31.694  74.478  1.00   .00      1SG 
ATOM   2237  C   THR   143       9.101  32.534  77.752  1.00 13.36      1SG 
ATOM   2238  O   THR   143       9.858  33.474  78.086  1.00 15.19      1SG 
ATOM   2239  N   LYS   144       7.820  32.719  77.446  1.00 14.07      1SG 
ATOM   2240  HN  LYS   144       7.225  31.976  77.151  1.00   .00      1SG 
ATOM   2241  CA  LYS   144       7.222  34.037  77.530  1.00 15.96      1SG 
ATOM   2242  HA  LYS   144       7.761  34.690  76.860  1.00   .00      1SG 
ATOM   2243  CB  LYS   144       5.741  33.995  77.149  1.00 16.54      1SG 
ATOM   2244  HB1 LYS   144       5.226  33.276  77.820  1.00   .00      1SG 
ATOM   2245  HB2 LYS   144       5.657  33.634  76.102  1.00   .00      1SG 
ATOM   2246  CG  LYS   144       5.029  35.356  77.254  1.00 17.80      1SG 
ATOM   2247  HG1 LYS   144       5.648  36.142  76.771  1.00   .00      1SG 
ATOM   2248  HG2 LYS   144       4.882  35.622  78.323  1.00   .00      1SG 
ATOM   2249  CD  LYS   144       3.666  35.260  76.549  1.00 22.86      1SG 
ATOM   2250  HD1 LYS   144       3.078  34.439  77.011  1.00   .00      1SG 
ATOM   2251  HD2 LYS   144       3.831  35.024  75.476  1.00   .00      1SG 
ATOM   2252  CE  LYS   144       2.869  36.564  76.655  1.00 28.76      1SG 
ATOM   2253  HE1 LYS   144       1.949  36.512  76.034  1.00   .00      1SG 
ATOM   2254  HE2 LYS   144       3.492  37.430  76.344  1.00   .00      1SG 
ATOM   2255  NZ  LYS   144       2.476  36.745  78.074  1.00 34.57      1SG 
ATOM   2256  HZ1 LYS   144       3.214  37.281  78.573  1.00   .00      1SG 
ATOM   2257  HZ2 LYS   144       2.360  35.814  78.523  1.00   .00      1SG 
ATOM   2258  HZ3 LYS   144       1.577  37.266  78.121  1.00   .00      1SG 
ATOM   2259  C   LYS   144       7.363  34.541  78.958  1.00 17.07      1SG 
ATOM   2260  O   LYS   144       7.752  35.692  79.174  1.00 17.66      1SG 
ATOM   2261  N   HSE   145       7.052  33.694  79.935  1.00 18.22      1SG 
ATOM   2262  HN  HSE   145       6.743  32.759  79.778  1.00   .00      1SG 
ATOM   2263  CA  HSE   145       7.166  34.149  81.327  1.00 20.65      1SG 
ATOM   2264  HA  HSE   145       6.636  35.085  81.419  1.00   .00      1SG 
ATOM   2265  CB  HSE   145       6.575  33.106  82.279  1.00 24.04      1SG 
ATOM   2266  HB1 HSE   145       6.749  33.433  83.326  1.00   .00      1SG 
ATOM   2267  HB2 HSE   145       7.085  32.134  82.111  1.00   .00      1SG 
ATOM   2268  ND1 HSE   145       4.271  33.943  81.707  1.00 41.33      1SG 
ATOM   2269  CG  HSE   145       5.104  32.911  82.080  1.00 37.89      1SG 
ATOM   2270  CE1 HSE   145       3.041  33.482  81.557  1.00 42.74      1SG 
ATOM   2271  HE1 HSE   145       2.158  34.049  81.265  1.00   .00      1SG 
ATOM   2272  NE2 HSE   145       3.047  32.189  81.824  1.00 42.91      1SG 
ATOM   2273  HE2 HSE   145       2.258  31.575  81.791  1.00   .00      1SG 
ATOM   2274  CD2 HSE   145       4.323  31.807  82.160  1.00 40.04      1SG 
ATOM   2275  HD2 HSE   145       4.591  30.793  82.430  1.00   .00      1SG 
ATOM   2276  C   HSE   145       8.608  34.446  81.707  1.00 16.70      1SG 
ATOM   2277  O   HSE   145       8.899  35.414  82.416  1.00 18.80      1SG 
ATOM   2278  N   LYS   146       9.517  33.611  81.219  1.00 16.03      1SG 
ATOM   2279  HN  LYS   146       9.280  32.835  80.640  1.00   .00      1SG 
ATOM   2280  CA  LYS   146      10.918  33.798  81.515  1.00 16.20      1SG 
ATOM   2281  HA  LYS   146      11.032  33.847  82.588  1.00   .00      1SG 
ATOM   2282  CB  LYS   146      11.737  32.638  80.942  1.00 17.97      1SG 
ATOM   2283  HB1 LYS   146      11.447  32.496  79.880  1.00   .00      1SG 
ATOM   2284  HB2 LYS   146      11.485  31.718  81.510  1.00   .00      1SG 
ATOM   2285  CG  LYS   146      13.245  32.843  81.005  1.00 27.26      1SG 
ATOM   2286  HG1 LYS   146      13.530  33.121  82.042  1.00   .00      1SG 
ATOM   2287  HG2 LYS   146      13.527  33.671  80.321  1.00   .00      1SG 
ATOM   2288  CD  LYS   146      14.012  31.568  80.596  1.00 32.84      1SG 
ATOM   2289  HD1 LYS   146      13.595  31.180  79.642  1.00   .00      1SG 
ATOM   2290  HD2 LYS   146      13.885  30.795  81.384  1.00   .00      1SG 
ATOM   2291  CE  LYS   146      15.494  31.861  80.414  1.00 40.44      1SG 
ATOM   2292  HE1 LYS   146      15.666  32.353  79.433  1.00   .00      1SG 
ATOM   2293  HE2 LYS   146      16.078  30.918  80.477  1.00   .00      1SG 
ATOM   2294  NZ  LYS   146      15.986  32.785  81.490  1.00 46.98      1SG 
ATOM   2295  HZ1 LYS   146      15.200  33.024  82.128  1.00   .00      1SG 
ATOM   2296  HZ2 LYS   146      16.358  33.655  81.057  1.00   .00      1SG 
ATOM   2297  HZ3 LYS   146      16.742  32.317  82.030  1.00   .00      1SG 
ATOM   2298  C   LYS   146      11.431  35.101  80.910  1.00 14.94      1SG 
ATOM   2299  O   LYS   146      12.171  35.837  81.564  1.00 16.76      1SG 
ATOM   2300  N   TRP   147      11.048  35.375  79.660  1.00 13.72      1SG 
ATOM   2301  HN  TRP   147      10.425  34.795  79.141  1.00   .00      1SG 
ATOM   2302  CA  TRP   147      11.550  36.577  78.995  1.00 14.37      1SG 
ATOM   2303  HA  TRP   147      12.594  36.688  79.247  1.00   .00      1SG 
ATOM   2304  CB  TRP   147      11.379  36.462  77.493  1.00 12.88      1SG 
ATOM   2305  HB1 TRP   147      11.530  37.461  77.032  1.00   .00      1SG 
ATOM   2306  HB2 TRP   147      10.350  36.109  77.270  1.00   .00      1SG 
ATOM   2307  CG  TRP   147      12.371  35.489  76.881  1.00 12.75      1SG 
ATOM   2308  CD1 TRP   147      13.304  34.696  77.534  1.00 15.59      1SG 
ATOM   2309  HD1 TRP   147      13.451  34.660  78.603  1.00   .00      1SG 
ATOM   2310  NE1 TRP   147      14.027  33.949  76.594  1.00 14.03      1SG 
ATOM   2311  HE1 TRP   147      14.742  33.316  76.793  1.00   .00      1SG 
ATOM   2312  CE2 TRP   147      13.553  34.264  75.343  1.00 13.33      1SG 
ATOM   2313  CD2 TRP   147      12.516  35.224  75.494  1.00 14.05      1SG 
ATOM   2314  CE3 TRP   147      11.869  35.711  74.350  1.00 14.52      1SG 
ATOM   2315  HE3 TRP   147      11.070  36.435  74.416  1.00   .00      1SG 
ATOM   2316  CZ3 TRP   147      12.280  35.236  73.084  1.00 17.66      1SG 
ATOM   2317  HZ3 TRP   147      11.797  35.608  72.192  1.00   .00      1SG 
ATOM   2318  CZ2 TRP   147      13.954  33.787  74.084  1.00 15.38      1SG 
ATOM   2319  HZ2 TRP   147      14.739  33.054  73.970  1.00   .00      1SG 
ATOM   2320  CH2 TRP   147      13.306  34.289  72.971  1.00 16.25      1SG 
ATOM   2321  HH2 TRP   147      13.598  33.943  71.991  1.00   .00      1SG 
ATOM   2322  C   TRP   147      10.905  37.833  79.540  1.00 14.18      1SG 
ATOM   2323  O   TRP   147      11.540  38.881  79.576  1.00 15.12      1SG 
ATOM   2324  N   GLU   148       9.662  37.714  80.002  1.00 15.72      1SG 
ATOM   2325  HN  GLU   148       9.126  36.875  79.941  1.00   .00      1SG 
ATOM   2326  CA  GLU   148       9.040  38.875  80.636  1.00 18.54      1SG 
ATOM   2327  HA  GLU   148       9.126  39.713  79.960  1.00   .00      1SG 
ATOM   2328  CB  GLU   148       7.574  38.589  80.944  1.00 18.12      1SG 
ATOM   2329  HB1 GLU   148       7.183  39.400  81.594  1.00   .00      1SG 
ATOM   2330  HB2 GLU   148       7.508  37.625  81.492  1.00   .00      1SG 
ATOM   2331  CG  GLU   148       6.702  38.501  79.694  1.00 22.97      1SG 
ATOM   2332  HG1 GLU   148       7.176  37.794  78.981  1.00   .00      1SG 
ATOM   2333  HG2 GLU   148       6.649  39.508  79.229  1.00   .00      1SG 
ATOM   2334  CD  GLU   148       5.276  38.024  79.957  1.00 27.85      1SG 
ATOM   2335  OE1 GLU   148       5.023  37.293  80.948  1.00 26.36      1SG 
ATOM   2336  OE2 GLU   148       4.409  38.376  79.137  1.00 28.70      1SG 
ATOM   2337  C   GLU   148       9.794  39.174  81.946  1.00 16.11      1SG 
ATOM   2338  O   GLU   148      10.137  40.327  82.232  1.00 16.88      1SG 
ATOM   2339  N   ALA   149      10.067  38.145  82.736  1.00 17.17      1SG 
ATOM   2340  HN  ALA   149       9.833  37.204  82.505  1.00   .00      1SG 
ATOM   2341  CA  ALA   149      10.744  38.369  84.015  1.00 18.97      1SG 
ATOM   2342  HA  ALA   149      10.163  39.081  84.583  1.00   .00      1SG 
ATOM   2343  CB  ALA   149      10.872  37.081  84.768  1.00 17.74      1SG 
ATOM   2344  HB1 ALA   149      11.462  36.349  84.176  1.00   .00      1SG 
ATOM   2345  HB2 ALA   149       9.865  36.653  84.959  1.00   .00      1SG 
ATOM   2346  HB3 ALA   149      11.393  37.258  85.733  1.00   .00      1SG 
ATOM   2347  C   ALA   149      12.112  38.993  83.830  1.00 20.75      1SG 
ATOM   2348  O   ALA   149      12.536  39.839  84.630  1.00 20.57      1SG 
ATOM   2349  N   ALA   150      12.809  38.572  82.772  1.00 16.47      1SG 
ATOM   2350  HN  ALA   150      12.448  37.898  82.133  1.00   .00      1SG 
ATOM   2351  CA  ALA   150      14.142  39.075  82.489  1.00 19.80      1SG 
ATOM   2352  HA  ALA   150      14.612  39.337  83.425  1.00   .00      1SG 
ATOM   2353  CB  ALA   150      14.958  37.991  81.758  1.00 18.41      1SG 
ATOM   2354  HB1 ALA   150      14.461  37.719  80.802  1.00   .00      1SG 
ATOM   2355  HB2 ALA   150      15.031  37.081  82.391  1.00   .00      1SG 
ATOM   2356  HB3 ALA   150      15.977  38.372  81.532  1.00   .00      1SG 
ATOM   2357  C   ALA   150      14.194  40.392  81.708  1.00 17.16      1SG 
ATOM   2358  O   ALA   150      15.289  40.877  81.433  1.00 17.46      1SG 
ATOM   2359  N   HSE   151      13.032  40.962  81.361  1.00 16.09      1SG 
ATOM   2360  HN  HSE   151      12.160  40.548  81.608  1.00   .00      1SG 
ATOM   2361  CA  HSE   151      12.935  42.235  80.594  1.00 16.81      1SG 
ATOM   2362  HA  HSE   151      11.892  42.418  80.385  1.00   .00      1SG 
ATOM   2363  CB  HSE   151      13.530  43.405  81.388  1.00 16.50      1SG 
ATOM   2364  HB1 HSE   151      13.446  44.329  80.778  1.00   .00      1SG 
ATOM   2365  HB2 HSE   151      14.602  43.194  81.585  1.00   .00      1SG 
ATOM   2366  ND1 HSE   151      13.171  44.707  83.523  1.00 19.47      1SG 
ATOM   2367  CG  HSE   151      12.848  43.646  82.704  1.00 18.72      1SG 
ATOM   2368  CE1 HSE   151      12.469  44.628  84.644  1.00 24.49      1SG 
ATOM   2369  HE1 HSE   151      12.502  45.314  85.490  1.00   .00      1SG 
ATOM   2370  NE2 HSE   151      11.697  43.555  84.577  1.00 24.76      1SG 
ATOM   2371  HE2 HSE   151      11.058  43.241  85.279  1.00   .00      1SG 
ATOM   2372  CD2 HSE   151      11.912  42.926  83.371  1.00 22.20      1SG 
ATOM   2373  HD2 HSE   151      11.396  42.023  83.069  1.00   .00      1SG 
ATOM   2374  C   HSE   151      13.605  42.171  79.219  1.00 16.72      1SG 
ATOM   2375  O   HSE   151      14.217  43.161  78.730  1.00 20.04      1SG 
ATOM   2376  N   VAL   152      13.475  41.016  78.585  1.00 15.19      1SG 
ATOM   2377  HN  VAL   152      12.990  40.238  78.978  1.00   .00      1SG 
ATOM   2378  CA  VAL   152      14.050  40.826  77.251  1.00 17.00      1SG 
ATOM   2379  HA  VAL   152      15.115  40.993  77.317  1.00   .00      1SG 
ATOM   2380  CB  VAL   152      13.760  39.395  76.738  1.00 15.36      1SG 
ATOM   2381  HB  VAL   152      12.686  39.156  76.894  1.00   .00      1SG 
ATOM   2382  CG1 VAL   152      14.106  39.289  75.195  1.00 20.64      1SG 
ATOM   2383 HG11 VAL   152      15.180  39.519  75.028  1.00   .00      1SG 
ATOM   2384 HG12 VAL   152      13.494  40.016  74.619  1.00   .00      1SG 
ATOM   2385 HG13 VAL   152      13.903  38.259  74.832  1.00   .00      1SG 
ATOM   2386  CG2 VAL   152      14.553  38.365  77.589  1.00 14.86      1SG 
ATOM   2387 HG21 VAL   152      14.250  38.437  78.655  1.00   .00      1SG 
ATOM   2388 HG22 VAL   152      15.642  38.572  77.515  1.00   .00      1SG 
ATOM   2389 HG23 VAL   152      14.343  37.335  77.229  1.00   .00      1SG 
ATOM   2390  C   VAL   152      13.500  41.838  76.245  1.00 17.63      1SG 
ATOM   2391  O   VAL   152      14.253  42.436  75.470  1.00 19.63      1SG 
ATOM   2392  N   ALA   153      12.193  42.065  76.271  1.00 18.74      1SG 
ATOM   2393  HN  ALA   153      11.574  41.635  76.924  1.00   .00      1SG 
ATOM   2394  CA  ALA   153      11.613  42.985  75.307  1.00 18.09      1SG 
ATOM   2395  HA  ALA   153      11.856  42.629  74.317  1.00   .00      1SG 
ATOM   2396  CB  ALA   153      10.102  43.066  75.485  1.00 19.01      1SG 
ATOM   2397  HB1 ALA   153       9.857  43.424  76.508  1.00   .00      1SG 
ATOM   2398  HB2 ALA   153       9.650  42.061  75.343  1.00   .00      1SG 
ATOM   2399  HB3 ALA   153       9.672  43.777  74.748  1.00   .00      1SG 
ATOM   2400  C   ALA   153      12.214  44.397  75.327  1.00 20.08      1SG 
ATOM   2401  O   ALA   153      12.466  44.983  74.275  1.00 19.00      1SG 
ATOM   2402  N   GLU   154      12.443  44.962  76.509  1.00 18.00      1SG 
ATOM   2403  HN  GLU   154      12.263  44.520  77.384  1.00   .00      1SG 
ATOM   2404  CA  GLU   154      12.994  46.318  76.522  1.00 17.90      1SG 
ATOM   2405  HA  GLU   154      12.405  46.930  75.855  1.00   .00      1SG 
ATOM   2406  CB  GLU   154      12.950  46.880  77.947  1.00 19.43      1SG 
ATOM   2407  HB1 GLU   154      11.925  46.742  78.352  1.00   .00      1SG 
ATOM   2408  HB2 GLU   154      13.179  47.966  77.909  1.00   .00      1SG 
ATOM   2409  CG  GLU   154      13.915  46.223  78.861  1.00 22.08      1SG 
ATOM   2410  HG1 GLU   154      14.950  46.482  78.552  1.00   .00      1SG 
ATOM   2411  HG2 GLU   154      13.783  45.121  78.806  1.00   .00      1SG 
ATOM   2412  CD  GLU   154      13.704  46.671  80.290  1.00 24.76      1SG 
ATOM   2413  OE1 GLU   154      12.556  46.975  80.646  1.00 29.58      1SG 
ATOM   2414  OE2 GLU   154      14.684  46.700  81.025  1.00 23.02      1SG 
ATOM   2415  C   GLU   154      14.407  46.333  75.946  1.00 18.24      1SG 
ATOM   2416  O   GLU   154      14.844  47.329  75.333  1.00 18.07      1SG 
ATOM   2417  N   GLN   155      15.127  45.224  76.108  1.00 19.75      1SG 
ATOM   2418  HN  GLN   155      14.791  44.427  76.605  1.00   .00      1SG 
ATOM   2419  CA  GLN   155      16.468  45.135  75.549  1.00 18.63      1SG 
ATOM   2420  HA  GLN   155      16.996  46.044  75.796  1.00   .00      1SG 
ATOM   2421  CB  GLN   155      17.199  43.922  76.120  1.00 20.74      1SG 
ATOM   2422  HB1 GLN   155      18.179  43.811  75.608  1.00   .00      1SG 
ATOM   2423  HB2 GLN   155      16.593  43.010  75.936  1.00   .00      1SG 
ATOM   2424  CG  GLN   155      17.428  44.074  77.602  1.00 26.02      1SG 
ATOM   2425  HG1 GLN   155      16.449  44.000  78.120  1.00   .00      1SG 
ATOM   2426  HG2 GLN   155      17.867  45.077  77.791  1.00   .00      1SG 
ATOM   2427  CD  GLN   155      18.355  43.035  78.199  1.00 32.23      1SG 
ATOM   2428  OE1 GLN   155      18.722  43.139  79.370  1.00 39.45      1SG 
ATOM   2429  NE2 GLN   155      18.743  42.032  77.407  1.00 33.04      1SG 
ATOM   2430 HE21 GLN   155      19.355  41.324  77.760  1.00   .00      1SG 
ATOM   2431 HE22 GLN   155      18.422  41.989  76.461  1.00   .00      1SG 
ATOM   2432  C   GLN   155      16.437  45.051  74.024  1.00 18.54      1SG 
ATOM   2433  O   GLN   155      17.220  45.742  73.339  1.00 18.14      1SG 
ATOM   2434  N   LEU   156      15.556  44.199  73.493  1.00 17.95      1SG 
ATOM   2435  HN  LEU   156      14.960  43.619  74.043  1.00   .00      1SG 
ATOM   2436  CA  LEU   156      15.438  44.090  72.045  1.00 17.80      1SG 
ATOM   2437  HA  LEU   156      16.426  43.911  71.648  1.00   .00      1SG 
ATOM   2438  CB  LEU   156      14.498  42.963  71.631  1.00 18.81      1SG 
ATOM   2439  HB1 LEU   156      14.308  43.034  70.539  1.00   .00      1SG 
ATOM   2440  HB2 LEU   156      13.535  43.080  72.171  1.00   .00      1SG 
ATOM   2441  CG  LEU   156      15.081  41.579  71.946  1.00 23.91      1SG 
ATOM   2442  HG  LEU   156      15.418  41.548  73.004  1.00   .00      1SG 
ATOM   2443  CD1 LEU   156      14.016  40.514  71.717  1.00 22.33      1SG 
ATOM   2444 HD11 LEU   156      13.677  40.534  70.659  1.00   .00      1SG 
ATOM   2445 HD12 LEU   156      13.141  40.707  72.374  1.00   .00      1SG 
ATOM   2446 HD13 LEU   156      14.434  39.508  71.936  1.00   .00      1SG 
ATOM   2447  CD2 LEU   156      16.300  41.317  71.073  1.00 21.88      1SG 
ATOM   2448 HD21 LEU   156      17.078  42.087  71.263  1.00   .00      1SG 
ATOM   2449 HD22 LEU   156      16.013  41.360  70.001  1.00   .00      1SG 
ATOM   2450 HD23 LEU   156      16.725  40.318  71.307  1.00   .00      1SG 
ATOM   2451  C   LEU   156      14.910  45.392  71.502  1.00 18.84      1SG 
ATOM   2452  O   LEU   156      15.355  45.855  70.449  1.00 19.12      1SG 
ATOM   2453  N   ARG   157      13.962  45.999  72.210  1.00 16.22      1SG 
ATOM   2454  HN  ARG   157      13.589  45.632  73.059  1.00   .00      1SG 
ATOM   2455  CA  ARG   157      13.427  47.273  71.733  1.00 19.35      1SG 
ATOM   2456  HA  ARG   157      13.028  47.119  70.741  1.00   .00      1SG 
ATOM   2457  CB  ARG   157      12.331  47.782  72.674  1.00 22.48      1SG 
ATOM   2458  HB1 ARG   157      12.753  47.892  73.696  1.00   .00      1SG 
ATOM   2459  HB2 ARG   157      11.505  47.040  72.704  1.00   .00      1SG 
ATOM   2460  CG  ARG   157      11.776  49.124  72.218  1.00 28.41      1SG 
ATOM   2461  HG1 ARG   157      11.670  49.119  71.112  1.00   .00      1SG 
ATOM   2462  HG2 ARG   157      12.485  49.929  72.507  1.00   .00      1SG 
ATOM   2463  CD  ARG   157      10.416  49.402  72.851  1.00 34.47      1SG 
ATOM   2464  HD1 ARG   157       9.655  48.732  72.396  1.00   .00      1SG 
ATOM   2465  HD2 ARG   157      10.141  50.465  72.679  1.00   .00      1SG 
ATOM   2466  NE  ARG   157      10.390  49.174  74.291  1.00 47.11      1SG 
ATOM   2467  HE  ARG   157       9.958  48.334  74.615  1.00   .00      1SG 
ATOM   2468  CZ  ARG   157      10.895  49.995  75.207  1.00 51.86      1SG 
ATOM   2469  NH1 ARG   157      11.487  51.133  74.840  1.00 54.92      1SG 
ATOM   2470 HH11 ARG   157      11.553  51.373  73.871  1.00   .00      1SG 
ATOM   2471 HH12 ARG   157      11.865  51.746  75.534  1.00   .00      1SG 
ATOM   2472  NH2 ARG   157      10.789  49.682  76.497  1.00 46.30      1SG 
ATOM   2473 HH21 ARG   157      10.332  48.835  76.770  1.00   .00      1SG 
ATOM   2474 HH22 ARG   157      11.166  50.294  77.193  1.00   .00      1SG 
ATOM   2475  C   ARG   157      14.499  48.351  71.593  1.00 17.51      1SG 
ATOM   2476  O   ARG   157      14.496  49.125  70.626  1.00 19.68      1SG 
ATOM   2477  N   ALA   158      15.418  48.409  72.549  1.00 19.35      1SG 
ATOM   2478  HN  ALA   158      15.431  47.782  73.324  1.00   .00      1SG 
ATOM   2479  CA  ALA   158      16.468  49.415  72.503  1.00 18.65      1SG 
ATOM   2480  HA  ALA   158      16.001  50.384  72.411  1.00   .00      1SG 
ATOM   2481  CB  ALA   158      17.309  49.354  73.754  1.00 23.15      1SG 
ATOM   2482  HB1 ALA   158      17.780  48.352  73.849  1.00   .00      1SG 
ATOM   2483  HB2 ALA   158      16.672  49.533  74.647  1.00   .00      1SG 
ATOM   2484  HB3 ALA   158      18.112  50.120  73.707  1.00   .00      1SG 
ATOM   2485  C   ALA   158      17.344  49.155  71.262  1.00 22.25      1SG 
ATOM   2486  O   ALA   158      17.772  50.092  70.565  1.00 21.91      1SG 
ATOM   2487  N   TYR   159      17.605  47.876  70.996  1.00 18.08      1SG 
ATOM   2488  HN  TYR   159      17.258  47.127  71.556  1.00   .00      1SG 
ATOM   2489  CA  TYR   159      18.425  47.512  69.853  1.00 18.88      1SG 
ATOM   2490  HA  TYR   159      19.317  48.120  69.877  1.00   .00      1SG 
ATOM   2491  CB  TYR   159      18.799  46.018  69.891  1.00 17.88      1SG 
ATOM   2492  HB1 TYR   159      17.896  45.417  70.132  1.00   .00      1SG 
ATOM   2493  HB2 TYR   159      19.584  45.853  70.659  1.00   .00      1SG 
ATOM   2494  CG  TYR   159      19.344  45.511  68.566  1.00 17.66      1SG 
ATOM   2495  CD1 TYR   159      20.674  45.752  68.182  1.00 20.95      1SG 
ATOM   2496  HD1 TYR   159      21.332  46.285  68.852  1.00   .00      1SG 
ATOM   2497  CE1 TYR   159      21.162  45.311  66.939  1.00 19.20      1SG 
ATOM   2498  HE1 TYR   159      22.187  45.502  66.658  1.00   .00      1SG 
ATOM   2499  CZ  TYR   159      20.306  44.620  66.067  1.00 19.40      1SG 
ATOM   2500  OH  TYR   159      20.743  44.188  64.828  1.00 18.77      1SG 
ATOM   2501  HH  TYR   159      21.695  44.305  64.792  1.00   .00      1SG 
ATOM   2502  CD2 TYR   159      18.515  44.825  67.681  1.00 14.98      1SG 
ATOM   2503  HD2 TYR   159      17.488  44.635  67.957  1.00   .00      1SG 
ATOM   2504  CE2 TYR   159      18.988  44.377  66.439  1.00 18.18      1SG 
ATOM   2505  HE2 TYR   159      18.328  43.843  65.771  1.00   .00      1SG 
ATOM   2506  C   TYR   159      17.676  47.802  68.575  1.00 20.63      1SG 
ATOM   2507  O   TYR   159      18.218  48.454  67.684  1.00 20.37      1SG 
ATOM   2508  N   LEU   160      16.428  47.333  68.481  1.00 17.10      1SG 
ATOM   2509  HN  LEU   160      15.979  46.842  69.224  1.00   .00      1SG 
ATOM   2510  CA  LEU   160      15.656  47.525  67.263  1.00 21.00      1SG 
ATOM   2511  HA  LEU   160      16.256  47.189  66.430  1.00   .00      1SG 
ATOM   2512  CB  LEU   160      14.352  46.743  67.324  1.00 21.35      1SG 
ATOM   2513  HB1 LEU   160      13.771  46.947  66.400  1.00   .00      1SG 
ATOM   2514  HB2 LEU   160      13.768  47.093  68.201  1.00   .00      1SG 
ATOM   2515  CG  LEU   160      14.564  45.223  67.448  1.00 21.85      1SG 
ATOM   2516  HG  LEU   160      15.241  45.003  68.301  1.00   .00      1SG 
ATOM   2517  CD1 LEU   160      13.184  44.557  67.683  1.00 18.01      1SG 
ATOM   2518 HD11 LEU   160      12.506  44.773  66.830  1.00   .00      1SG 
ATOM   2519 HD12 LEU   160      12.724  44.957  68.612  1.00   .00      1SG 
ATOM   2520 HD13 LEU   160      13.305  43.456  67.769  1.00   .00      1SG 
ATOM   2521  CD2 LEU   160      15.200  44.678  66.161  1.00 21.55      1SG 
ATOM   2522 HD21 LEU   160      16.182  45.166  65.984  1.00   .00      1SG 
ATOM   2523 HD22 LEU   160      14.538  44.888  65.294  1.00   .00      1SG 
ATOM   2524 HD23 LEU   160      15.360  43.582  66.253  1.00   .00      1SG 
ATOM   2525  C   LEU   160      15.352  48.964  66.887  1.00 22.99      1SG 
ATOM   2526  O   LEU   160      15.324  49.296  65.704  1.00 20.80      1SG 
ATOM   2527  N   GLU   161      15.129  49.820  67.879  1.00 21.19      1SG 
ATOM   2528  HN  GLU   161      15.163  49.555  68.840  1.00   .00      1SG 
ATOM   2529  CA  GLU   161      14.818  51.217  67.590  1.00 25.02      1SG 
ATOM   2530  HA  GLU   161      14.355  51.262  66.615  1.00   .00      1SG 
ATOM   2531  CB  GLU   161      13.871  51.793  68.660  1.00 25.88      1SG 
ATOM   2532  HB1 GLU   161      13.668  52.857  68.415  1.00   .00      1SG 
ATOM   2533  HB2 GLU   161      14.381  51.742  69.645  1.00   .00      1SG 
ATOM   2534  CG  GLU   161      12.553  51.067  68.765  1.00 27.84      1SG 
ATOM   2535  HG1 GLU   161      12.740  50.019  69.083  1.00   .00      1SG 
ATOM   2536  HG2 GLU   161      12.059  51.064  67.770  1.00   .00      1SG 
ATOM   2537  CD  GLU   161      11.614  51.722  69.773  1.00 33.60      1SG 
ATOM   2538  OE1 GLU   161      12.127  52.414  70.680  1.00 31.76      1SG 
ATOM   2539  OE2 GLU   161      10.380  51.522  69.656  1.00 34.55      1SG 
ATOM   2540  C   GLU   161      16.060  52.087  67.525  1.00 25.95      1SG 
ATOM   2541  O   GLU   161      15.993  53.223  67.050  1.00 28.10      1SG 
ATOM   2542  N   GLY   162      17.189  51.567  67.988  1.00 23.68      1SG 
ATOM   2543  HN  GLY   162      17.261  50.639  68.344  1.00   .00      1SG 
ATOM   2544  CA  GLY   162      18.390  52.375  67.984  1.00 25.89      1SG 
ATOM   2545  HA1 GLY   162      18.761  52.415  68.997  1.00   .00      1SG 
ATOM   2546  HA2 GLY   162      18.118  53.364  67.648  1.00   .00      1SG 
ATOM   2547  C   GLY   162      19.477  51.839  67.089  1.00 26.62      1SG 
ATOM   2548  O   GLY   162      19.577  52.170  65.904  1.00 24.69      1SG 
ATOM   2549  N   THR   163      20.289  50.992  67.686  1.00 25.30      1SG 
ATOM   2550  HN  THR   163      20.170  50.757  68.647  1.00   .00      1SG 
ATOM   2551  CA  THR   163      21.396  50.341  67.031  1.00 23.66      1SG 
ATOM   2552  HA  THR   163      22.196  51.058  66.926  1.00   .00      1SG 
ATOM   2553  CB  THR   163      21.855  49.145  67.857  1.00 23.01      1SG 
ATOM   2554  HB  THR   163      21.062  48.367  67.875  1.00   .00      1SG 
ATOM   2555  OG1 THR   163      22.118  49.577  69.194  1.00 28.94      1SG 
ATOM   2556  HG1 THR   163      22.245  50.527  69.145  1.00   .00      1SG 
ATOM   2557  CG2 THR   163      23.124  48.531  67.263  1.00 22.12      1SG 
ATOM   2558 HG21 THR   163      23.882  49.323  67.080  1.00   .00      1SG 
ATOM   2559 HG22 THR   163      22.888  48.036  66.297  1.00   .00      1SG 
ATOM   2560 HG23 THR   163      23.551  47.788  67.970  1.00   .00      1SG 
ATOM   2561  C   THR   163      21.063  49.813  65.650  1.00 22.71      1SG 
ATOM   2562  O   THR   163      21.776  50.104  64.689  1.00 22.78      1SG 
ATOM   2563  N   CYS   164      19.999  49.010  65.566  1.00 19.67      1SG 
ATOM   2564  HN  CYS   164      19.419  48.797  66.348  1.00   .00      1SG 
ATOM   2565  CA  CYS   164      19.635  48.395  64.281  1.00 23.58      1SG 
ATOM   2566  HA  CYS   164      20.456  47.772  63.959  1.00   .00      1SG 
ATOM   2567  CB  CYS   164      18.357  47.558  64.450  1.00 21.94      1SG 
ATOM   2568  HB1 CYS   164      17.530  48.242  64.733  1.00   .00      1SG 
ATOM   2569  HB2 CYS   164      18.519  46.843  65.284  1.00   .00      1SG 
ATOM   2570  SG  CYS   164      17.878  46.629  62.951  1.00 26.12      1SG 
ATOM   2571  HG1 CYS   164      16.691  46.267  63.414  1.00   .00      1SG 
ATOM   2572  C   CYS   164      19.467  49.457  63.196  1.00 21.95      1SG 
ATOM   2573  O   CYS   164      20.051  49.380  62.113  1.00 19.56      1SG 
ATOM   2574  N   VAL   165      18.720  50.495  63.518  1.00 20.47      1SG 
ATOM   2575  HN  VAL   165      18.290  50.594  64.412  1.00   .00      1SG 
ATOM   2576  CA  VAL   165      18.490  51.558  62.563  1.00 23.97      1SG 
ATOM   2577  HA  VAL   165      18.220  51.112  61.618  1.00   .00      1SG 
ATOM   2578  CB  VAL   165      17.362  52.476  63.069  1.00 26.16      1SG 
ATOM   2579  HB  VAL   165      17.537  52.726  64.137  1.00   .00      1SG 
ATOM   2580  CG1 VAL   165      17.329  53.748  62.251  1.00 32.44      1SG 
ATOM   2581 HG11 VAL   165      17.329  53.505  61.167  1.00   .00      1SG 
ATOM   2582 HG12 VAL   165      18.225  54.366  62.476  1.00   .00      1SG 
ATOM   2583 HG13 VAL   165      16.409  54.324  62.485  1.00   .00      1SG 
ATOM   2584  CG2 VAL   165      16.039  51.742  62.941  1.00 25.62      1SG 
ATOM   2585 HG21 VAL   165      15.989  50.913  63.679  1.00   .00      1SG 
ATOM   2586 HG22 VAL   165      15.941  51.314  61.920  1.00   .00      1SG 
ATOM   2587 HG23 VAL   165      15.198  52.442  63.135  1.00   .00      1SG 
ATOM   2588  C   VAL   165      19.754  52.364  62.246  1.00 21.44      1SG 
ATOM   2589  O   VAL   165      19.994  52.739  61.088  1.00 23.51      1SG 
ATOM   2590  N   GLU   166      20.547  52.657  63.269  1.00 20.76      1SG 
ATOM   2591  HN  GLU   166      20.342  52.387  64.206  1.00   .00      1SG 
ATOM   2592  CA  GLU   166      21.781  53.405  63.055  1.00 24.61      1SG 
ATOM   2593  HA  GLU   166      21.518  54.367  62.641  1.00   .00      1SG 
ATOM   2594  CB  GLU   166      22.546  53.584  64.354  1.00 26.11      1SG 
ATOM   2595  HB1 GLU   166      23.575  53.923  64.109  1.00   .00      1SG 
ATOM   2596  HB2 GLU   166      22.603  52.599  64.864  1.00   .00      1SG 
ATOM   2597  CG  GLU   166      21.930  54.583  65.314  1.00 38.92      1SG 
ATOM   2598  HG1 GLU   166      20.827  54.449  65.325  1.00   .00      1SG 
ATOM   2599  HG2 GLU   166      22.169  55.613  64.974  1.00   .00      1SG 
ATOM   2600  CD  GLU   166      22.464  54.396  66.737  1.00 43.03      1SG 
ATOM   2601  OE1 GLU   166      23.694  54.191  66.896  1.00 44.04      1SG 
ATOM   2602  OE2 GLU   166      21.656  54.454  67.690  1.00 47.81      1SG 
ATOM   2603  C   GLU   166      22.690  52.654  62.098  1.00 23.27      1SG 
ATOM   2604  O   GLU   166      23.252  53.250  61.178  1.00 19.40      1SG 
ATOM   2605  N   TRP   167      22.870  51.353  62.330  1.00 17.78      1SG 
ATOM   2606  HN  TRP   167      22.441  50.857  63.080  1.00   .00      1SG 
ATOM   2607  CA  TRP   167      23.743  50.614  61.437  1.00 18.07      1SG 
ATOM   2608  HA  TRP   167      24.617  51.219  61.247  1.00   .00      1SG 
ATOM   2609  CB  TRP   167      24.147  49.275  62.067  1.00 18.00      1SG 
ATOM   2610  HB1 TRP   167      24.566  48.605  61.286  1.00   .00      1SG 
ATOM   2611  HB2 TRP   167      23.256  48.791  62.522  1.00   .00      1SG 
ATOM   2612  CG  TRP   167      25.200  49.509  63.148  1.00 21.50      1SG 
ATOM   2613  CD1 TRP   167      24.978  49.941  64.433  1.00 25.60      1SG 
ATOM   2614  HD1 TRP   167      24.004  50.100  64.873  1.00   .00      1SG 
ATOM   2615  NE1 TRP   167      26.177  50.142  65.079  1.00 26.84      1SG 
ATOM   2616  HE1 TRP   167      26.281  50.454  65.998  1.00   .00      1SG 
ATOM   2617  CE2 TRP   167      27.200  49.833  64.221  1.00 25.14      1SG 
ATOM   2618  CD2 TRP   167      26.622  49.430  62.995  1.00 24.33      1SG 
ATOM   2619  CE3 TRP   167      27.469  49.062  61.935  1.00 21.84      1SG 
ATOM   2620  HE3 TRP   167      27.077  48.745  60.980  1.00   .00      1SG 
ATOM   2621  CZ3 TRP   167      28.851  49.111  62.133  1.00 26.57      1SG 
ATOM   2622  HZ3 TRP   167      29.513  48.833  61.326  1.00   .00      1SG 
ATOM   2623  CZ2 TRP   167      28.591  49.878  64.418  1.00 26.76      1SG 
ATOM   2624  HZ2 TRP   167      29.030  50.183  65.356  1.00   .00      1SG 
ATOM   2625  CH2 TRP   167      29.394  49.516  63.363  1.00 26.62      1SG 
ATOM   2626  HH2 TRP   167      30.467  49.544  63.483  1.00   .00      1SG 
ATOM   2627  C   TRP   167      23.145  50.434  60.042  1.00 17.58      1SG 
ATOM   2628  O   TRP   167      23.880  50.425  59.042  1.00 18.39      1SG 
ATOM   2629  N   LEU   168      21.833  50.301  59.957  1.00 16.78      1SG 
ATOM   2630  HN  LEU   168      21.227  50.294  60.748  1.00   .00      1SG 
ATOM   2631  CA  LEU   168      21.226  50.156  58.641  1.00 17.62      1SG 
ATOM   2632  HA  LEU   168      21.674  49.299  58.161  1.00   .00      1SG 
ATOM   2633  CB  LEU   168      19.710  49.968  58.750  1.00 12.95      1SG 
ATOM   2634  HB1 LEU   168      19.323  50.752  59.433  1.00   .00      1SG 
ATOM   2635  HB2 LEU   168      19.527  48.971  59.203  1.00   .00      1SG 
ATOM   2636  CG  LEU   168      18.896  50.043  57.449  1.00 17.23      1SG 
ATOM   2637  HG  LEU   168      18.937  51.079  57.049  1.00   .00      1SG 
ATOM   2638  CD1 LEU   168      19.458  49.072  56.403  1.00 15.83      1SG 
ATOM   2639 HD11 LEU   168      19.416  48.030  56.787  1.00   .00      1SG 
ATOM   2640 HD12 LEU   168      20.517  49.326  56.182  1.00   .00      1SG 
ATOM   2641 HD13 LEU   168      18.857  49.131  55.471  1.00   .00      1SG 
ATOM   2642  CD2 LEU   168      17.426  49.694  57.721  1.00 18.79      1SG 
ATOM   2643 HD21 LEU   168      16.994  50.408  58.455  1.00   .00      1SG 
ATOM   2644 HD22 LEU   168      17.352  48.667  58.139  1.00   .00      1SG 
ATOM   2645 HD23 LEU   168      16.842  49.757  56.778  1.00   .00      1SG 
ATOM   2646  C   LEU   168      21.555  51.417  57.843  1.00 19.46      1SG 
ATOM   2647  O   LEU   168      21.904  51.335  56.679  1.00 15.77      1SG 
ATOM   2648  N   ARG   169      21.459  52.589  58.474  1.00 18.05      1SG 
ATOM   2649  HN  ARG   169      21.176  52.672  59.426  1.00   .00      1SG 
ATOM   2650  CA  ARG   169      21.779  53.836  57.758  1.00 17.75      1SG 
ATOM   2651  HA  ARG   169      21.181  53.872  56.859  1.00   .00      1SG 
ATOM   2652  CB  ARG   169      21.480  55.039  58.646  1.00 21.17      1SG 
ATOM   2653  HB1 ARG   169      21.908  55.942  58.162  1.00   .00      1SG 
ATOM   2654  HB2 ARG   169      21.983  54.881  59.623  1.00   .00      1SG 
ATOM   2655  CG  ARG   169      20.011  55.295  58.907  1.00 23.93      1SG 
ATOM   2656  HG1 ARG   169      19.508  54.352  59.210  1.00   .00      1SG 
ATOM   2657  HG2 ARG   169      19.523  55.682  57.987  1.00   .00      1SG 
ATOM   2658  CD  ARG   169      19.908  56.327  60.028  1.00 31.64      1SG 
ATOM   2659  HD1 ARG   169      20.501  57.227  59.760  1.00   .00      1SG 
ATOM   2660  HD2 ARG   169      20.288  55.887  60.975  1.00   .00      1SG 
ATOM   2661  NE  ARG   169      18.545  56.755  60.261  1.00 42.93      1SG 
ATOM   2662  HE  ARG   169      17.936  56.842  59.473  1.00   .00      1SG 
ATOM   2663  CZ  ARG   169      18.059  57.039  61.464  1.00 47.74      1SG 
ATOM   2664  NH1 ARG   169      18.840  56.926  62.534  1.00 47.08      1SG 
ATOM   2665 HH11 ARG   169      19.789  56.628  62.431  1.00   .00      1SG 
ATOM   2666 HH12 ARG   169      18.478  57.139  63.442  1.00   .00      1SG 
ATOM   2667  NH2 ARG   169      16.802  57.449  61.592  1.00 51.05      1SG 
ATOM   2668 HH21 ARG   169      16.222  57.544  60.783  1.00   .00      1SG 
ATOM   2669 HH22 ARG   169      16.436  57.663  62.498  1.00   .00      1SG 
ATOM   2670  C   ARG   169      23.227  53.870  57.323  1.00 18.55      1SG 
ATOM   2671  O   ARG   169      23.552  54.311  56.208  1.00 21.37      1SG 
ATOM   2672  N   ARG   170      24.115  53.399  58.189  1.00 17.28      1SG 
ATOM   2673  HN  ARG   170      23.856  53.043  59.083  1.00   .00      1SG 
ATOM   2674  CA  ARG   170      25.519  53.380  57.871  1.00 18.59      1SG 
ATOM   2675  HA  ARG   170      25.827  54.386  57.629  1.00   .00      1SG 
ATOM   2676  CB  ARG   170      26.303  52.852  59.069  1.00 20.61      1SG 
ATOM   2677  HB1 ARG   170      25.851  51.886  59.379  1.00   .00      1SG 
ATOM   2678  HB2 ARG   170      26.198  53.582  59.899  1.00   .00      1SG 
ATOM   2679  CG  ARG   170      27.783  52.624  58.825  1.00 23.50      1SG 
ATOM   2680  HG1 ARG   170      28.308  53.601  58.758  1.00   .00      1SG 
ATOM   2681  HG2 ARG   170      27.926  52.073  57.871  1.00   .00      1SG 
ATOM   2682  CD  ARG   170      28.349  51.818  59.970  1.00 31.46      1SG 
ATOM   2683  HD1 ARG   170      27.876  50.813  59.975  1.00   .00      1SG 
ATOM   2684  HD2 ARG   170      28.137  52.345  60.925  1.00   .00      1SG 
ATOM   2685  NE  ARG   170      29.790  51.612  59.907  1.00 29.15      1SG 
ATOM   2686  HE  ARG   170      30.144  50.943  59.255  1.00   .00      1SG 
ATOM   2687  CZ  ARG   170      30.660  52.268  60.672  1.00 34.21      1SG 
ATOM   2688  NH1 ARG   170      30.226  53.177  61.540  1.00 34.10      1SG 
ATOM   2689 HH11 ARG   170      29.247  53.367  61.618  1.00   .00      1SG 
ATOM   2690 HH12 ARG   170      30.878  53.671  62.115  1.00   .00      1SG 
ATOM   2691  NH2 ARG   170      31.959  51.986  60.609  1.00 31.71      1SG 
ATOM   2692 HH21 ARG   170      32.622  52.577  61.069  1.00   .00      1SG 
ATOM   2693 HH22 ARG   170      32.272  51.183  60.101  1.00   .00      1SG 
ATOM   2694  C   ARG   170      25.776  52.494  56.647  1.00 21.50      1SG 
ATOM   2695  O   ARG   170      26.520  52.863  55.727  1.00 20.79      1SG 
ATOM   2696  N   TYR   171      25.163  51.317  56.641  1.00 17.99      1SG 
ATOM   2697  HN  TYR   171      24.562  51.020  57.379  1.00   .00      1SG 
ATOM   2698  CA  TYR   171      25.345  50.392  55.538  1.00 18.28      1SG 
ATOM   2699  HA  TYR   171      26.406  50.245  55.398  1.00   .00      1SG 
ATOM   2700  CB  TYR   171      24.653  49.043  55.828  1.00 17.75      1SG 
ATOM   2701  HB1 TYR   171      24.790  48.370  54.955  1.00   .00      1SG 
ATOM   2702  HB2 TYR   171      23.571  49.221  56.007  1.00   .00      1SG 
ATOM   2703  CG  TYR   171      25.192  48.307  57.049  1.00 16.34      1SG 
ATOM   2704  CD1 TYR   171      26.538  48.367  57.389  1.00 21.10      1SG 
ATOM   2705  HD1 TYR   171      27.204  48.979  56.799  1.00   .00      1SG 
ATOM   2706  CE1 TYR   171      27.054  47.650  58.483  1.00 20.90      1SG 
ATOM   2707  HE1 TYR   171      28.103  47.713  58.731  1.00   .00      1SG 
ATOM   2708  CZ  TYR   171      26.198  46.859  59.242  1.00 20.47      1SG 
ATOM   2709  OH  TYR   171      26.699  46.159  60.307  1.00 18.83      1SG 
ATOM   2710  HH  TYR   171      27.555  45.806  60.054  1.00   .00      1SG 
ATOM   2711  CD2 TYR   171      24.350  47.509  57.830  1.00 19.00      1SG 
ATOM   2712  HD2 TYR   171      23.299  47.453  57.587  1.00   .00      1SG 
ATOM   2713  CE2 TYR   171      24.843  46.780  58.922  1.00 16.72      1SG 
ATOM   2714  HE2 TYR   171      24.179  46.163  59.510  1.00   .00      1SG 
ATOM   2715  C   TYR   171      24.780  50.975  54.248  1.00 18.02      1SG 
ATOM   2716  O   TYR   171      25.399  50.845  53.178  1.00 17.19      1SG 
ATOM   2717  N   LEU   172      23.610  51.598  54.336  1.00 19.71      1SG 
ATOM   2718  HN  LEU   172      23.110  51.699  55.192  1.00   .00      1SG 
ATOM   2719  CA  LEU   172      23.004  52.171  53.141  1.00 23.17      1SG 
ATOM   2720  HA  LEU   172      22.912  51.386  52.405  1.00   .00      1SG 
ATOM   2721  CB  LEU   172      21.628  52.767  53.456  1.00 23.34      1SG 
ATOM   2722  HB1 LEU   172      21.300  53.383  52.592  1.00   .00      1SG 
ATOM   2723  HB2 LEU   172      21.719  53.420  54.349  1.00   .00      1SG 
ATOM   2724  CG  LEU   172      20.560  51.700  53.733  1.00 21.31      1SG 
ATOM   2725  HG  LEU   172      20.978  50.935  54.421  1.00   .00      1SG 
ATOM   2726  CD1 LEU   172      19.312  52.322  54.368  1.00 17.24      1SG 
ATOM   2727 HD11 LEU   172      18.876  53.084  53.687  1.00   .00      1SG 
ATOM   2728 HD12 LEU   172      19.581  52.815  55.326  1.00   .00      1SG 
ATOM   2729 HD13 LEU   172      18.550  51.535  54.553  1.00   .00      1SG 
ATOM   2730  CD2 LEU   172      20.216  50.991  52.440  1.00 20.23      1SG 
ATOM   2731 HD21 LEU   172      21.121  50.503  52.019  1.00   .00      1SG 
ATOM   2732 HD22 LEU   172      19.831  51.723  51.698  1.00   .00      1SG 
ATOM   2733 HD23 LEU   172      19.448  50.211  52.629  1.00   .00      1SG 
ATOM   2734  C   LEU   172      23.911  53.230  52.522  1.00 24.94      1SG 
ATOM   2735  O   LEU   172      23.984  53.354  51.296  1.00 24.53      1SG 
ATOM   2736  N   GLU   173      24.600  53.977  53.377  1.00 24.77      1SG 
ATOM   2737  HN  GLU   173      24.526  53.864  54.365  1.00   .00      1SG 
ATOM   2738  CA  GLU   173      25.512  55.014  52.910  1.00 29.97      1SG 
ATOM   2739  HA  GLU   173      25.006  55.583  52.144  1.00   .00      1SG 
ATOM   2740  CB  GLU   173      25.933  55.935  54.066  1.00 36.66      1SG 
ATOM   2741  HB1 GLU   173      26.595  56.729  53.661  1.00   .00      1SG 
ATOM   2742  HB2 GLU   173      26.503  55.334  54.806  1.00   .00      1SG 
ATOM   2743  CG  GLU   173      24.777  56.590  54.771  1.00 52.92      1SG 
ATOM   2744  HG1 GLU   173      25.116  56.938  55.770  1.00   .00      1SG 
ATOM   2745  HG2 GLU   173      23.966  55.842  54.901  1.00   .00      1SG 
ATOM   2746  CD  GLU   173      24.213  57.782  54.015  1.00 65.43      1SG 
ATOM   2747  OE1 GLU   173      23.875  57.641  52.810  1.00 72.10      1SG 
ATOM   2748  OE2 GLU   173      24.104  58.864  54.640  1.00 69.37      1SG 
ATOM   2749  C   GLU   173      26.752  54.366  52.322  1.00 28.52      1SG 
ATOM   2750  O   GLU   173      27.106  54.634  51.170  1.00 28.91      1SG 
ATOM   2751  N   ASN   174      27.400  53.496  53.094  1.00 24.17      1SG 
ATOM   2752  HN  ASN   174      27.093  53.259  54.012  1.00   .00      1SG 
ATOM   2753  CA  ASN   174      28.612  52.838  52.620  1.00 24.74      1SG 
ATOM   2754  HA  ASN   174      29.315  53.605  52.332  1.00   .00      1SG 
ATOM   2755  CB  ASN   174      29.219  51.945  53.709  1.00 24.73      1SG 
ATOM   2756  HB1 ASN   174      30.075  51.382  53.280  1.00   .00      1SG 
ATOM   2757  HB2 ASN   174      28.448  51.226  54.059  1.00   .00      1SG 
ATOM   2758  CG  ASN   174      29.716  52.743  54.906  1.00 32.04      1SG 
ATOM   2759  OD1 ASN   174      30.215  52.178  55.887  1.00 29.19      1SG 
ATOM   2760  ND2 ASN   174      29.567  54.066  54.836  1.00 27.66      1SG 
ATOM   2761 HD21 ASN   174      30.004  54.655  55.516  1.00   .00      1SG 
ATOM   2762 HD22 ASN   174      29.018  54.469  54.104  1.00   .00      1SG 
ATOM   2763  C   ASN   174      28.431  52.007  51.349  1.00 23.13      1SG 
ATOM   2764  O   ASN   174      29.353  51.906  50.533  1.00 25.84      1SG 
ATOM   2765  N   GLY   175      27.258  51.415  51.179  1.00 24.54      1SG 
ATOM   2766  HN  GLY   175      26.507  51.495  51.830  1.00   .00      1SG 
ATOM   2767  CA  GLY   175      27.026  50.602  49.992  1.00 23.74      1SG 
ATOM   2768  HA1 GLY   175      26.640  49.642  50.301  1.00   .00      1SG 
ATOM   2769  HA2 GLY   175      27.963  50.476  49.471  1.00   .00      1SG 
ATOM   2770  C   GLY   175      26.028  51.288  49.091  1.00 23.36      1SG 
ATOM   2771  O   GLY   175      25.275  50.634  48.378  1.00 25.51      1SG 
ATOM   2772  N   LYS   176      26.044  52.618  49.091  1.00 21.68      1SG 
ATOM   2773  HN  LYS   176      26.696  53.150  49.626  1.00   .00      1SG 
ATOM   2774  CA  LYS   176      25.084  53.368  48.288  1.00 26.01      1SG 
ATOM   2775  HA  LYS   176      24.104  53.230  48.719  1.00   .00      1SG 
ATOM   2776  CB  LYS   176      25.455  54.845  48.271  1.00 30.74      1SG 
ATOM   2777  HB1 LYS   176      26.449  54.958  47.788  1.00   .00      1SG 
ATOM   2778  HB2 LYS   176      25.520  55.209  49.318  1.00   .00      1SG 
ATOM   2779  CG  LYS   176      24.447  55.700  47.519  1.00 38.81      1SG 
ATOM   2780  HG1 LYS   176      23.454  55.599  48.006  1.00   .00      1SG 
ATOM   2781  HG2 LYS   176      24.373  55.334  46.473  1.00   .00      1SG 
ATOM   2782  CD  LYS   176      24.840  57.165  47.502  1.00 42.97      1SG 
ATOM   2783  HD1 LYS   176      25.005  57.509  48.545  1.00   .00      1SG 
ATOM   2784  HD2 LYS   176      24.014  57.758  47.055  1.00   .00      1SG 
ATOM   2785  CE  LYS   176      26.111  57.393  46.695  1.00 49.85      1SG 
ATOM   2786  HE1 LYS   176      25.978  56.993  45.667  1.00   .00      1SG 
ATOM   2787  HE2 LYS   176      26.966  56.888  47.194  1.00   .00      1SG 
ATOM   2788  NZ  LYS   176      26.447  58.842  46.577  1.00 56.90      1SG 
ATOM   2789  HZ1 LYS   176      26.589  59.244  47.526  1.00   .00      1SG 
ATOM   2790  HZ2 LYS   176      25.668  59.341  46.102  1.00   .00      1SG 
ATOM   2791  HZ3 LYS   176      27.318  58.952  46.020  1.00   .00      1SG 
ATOM   2792  C   LYS   176      24.947  52.889  46.844  1.00 26.25      1SG 
ATOM   2793  O   LYS   176      23.828  52.763  46.322  1.00 25.55      1SG 
ATOM   2794  N   GLU   177      26.081  52.638  46.202  1.00 26.54      1SG 
ATOM   2795  HN  GLU   177      26.974  52.711  46.640  1.00   .00      1SG 
ATOM   2796  CA  GLU   177      26.072  52.235  44.797  1.00 35.19      1SG 
ATOM   2797  HA  GLU   177      25.589  53.011  44.222  1.00   .00      1SG 
ATOM   2798  CB  GLU   177      27.507  52.031  44.327  1.00 43.38      1SG 
ATOM   2799  HB1 GLU   177      27.516  51.960  43.219  1.00   .00      1SG 
ATOM   2800  HB2 GLU   177      27.892  51.079  44.751  1.00   .00      1SG 
ATOM   2801  CG  GLU   177      28.426  53.170  44.756  1.00 54.14      1SG 
ATOM   2802  HG1 GLU   177      28.691  53.034  45.826  1.00   .00      1SG 
ATOM   2803  HG2 GLU   177      27.886  54.133  44.633  1.00   .00      1SG 
ATOM   2804  CD  GLU   177      29.711  53.234  43.948  1.00 61.32      1SG 
ATOM   2805  OE1 GLU   177      30.427  52.208  43.881  1.00 65.74      1SG 
ATOM   2806  OE2 GLU   177      30.003  54.314  43.381  1.00 64.43      1SG 
ATOM   2807  C   GLU   177      25.231  51.005  44.475  1.00 33.59      1SG 
ATOM   2808  O   GLU   177      24.507  50.947  43.466  1.00 33.83      1SG 
ATOM   2809  N   THR   178      25.295  50.023  45.346  1.00 29.81      1SG 
ATOM   2810  HN  THR   178      25.840  50.065  46.180  1.00   .00      1SG 
ATOM   2811  CA  THR   178      24.546  48.810  45.104  1.00 31.75      1SG 
ATOM   2812  HA  THR   178      24.228  48.805  44.072  1.00   .00      1SG 
ATOM   2813  CB  THR   178      25.438  47.598  45.401  1.00 35.66      1SG 
ATOM   2814  HB  THR   178      24.812  46.699  45.584  1.00   .00      1SG 
ATOM   2815  OG1 THR   178      26.214  47.874  46.565  1.00 38.33      1SG 
ATOM   2816  HG1 THR   178      25.584  48.029  47.273  1.00   .00      1SG 
ATOM   2817  CG2 THR   178      26.393  47.324  44.228  1.00 40.56      1SG 
ATOM   2818 HG21 THR   178      27.045  48.207  44.052  1.00   .00      1SG 
ATOM   2819 HG22 THR   178      25.809  47.124  43.304  1.00   .00      1SG 
ATOM   2820 HG23 THR   178      27.037  46.449  44.461  1.00   .00      1SG 
ATOM   2821  C   THR   178      23.238  48.711  45.893  1.00 30.97      1SG 
ATOM   2822  O   THR   178      22.278  48.104  45.414  1.00 31.84      1SG 
ATOM   2823  N   LEU   179      23.177  49.323  47.078  1.00 24.54      1SG 
ATOM   2824  HN  LEU   179      23.936  49.853  47.449  1.00   .00      1SG 
ATOM   2825  CA  LEU   179      21.969  49.241  47.901  1.00 24.87      1SG 
ATOM   2826  HA  LEU   179      21.503  48.285  47.715  1.00   .00      1SG 
ATOM   2827  CB  LEU   179      22.310  49.384  49.381  1.00 22.85      1SG 
ATOM   2828  HB1 LEU   179      21.362  49.392  49.960  1.00   .00      1SG 
ATOM   2829  HB2 LEU   179      22.830  50.354  49.529  1.00   .00      1SG 
ATOM   2830  CG  LEU   179      23.191  48.284  49.924  1.00 19.34      1SG 
ATOM   2831  HG  LEU   179      24.101  48.191  49.293  1.00   .00      1SG 
ATOM   2832  CD1 LEU   179      23.597  48.609  51.365  1.00 20.17      1SG 
ATOM   2833 HD11 LEU   179      22.694  48.698  52.005  1.00   .00      1SG 
ATOM   2834 HD12 LEU   179      24.149  49.573  51.394  1.00   .00      1SG 
ATOM   2835 HD13 LEU   179      24.239  47.798  51.769  1.00   .00      1SG 
ATOM   2836  CD2 LEU   179      22.400  46.962  49.847  1.00 24.34      1SG 
ATOM   2837 HD21 LEU   179      22.281  46.649  48.788  1.00   .00      1SG 
ATOM   2838 HD22 LEU   179      21.391  47.099  50.292  1.00   .00      1SG 
ATOM   2839 HD23 LEU   179      22.945  46.163  50.394  1.00   .00      1SG 
ATOM   2840  C   LEU   179      20.885  50.251  47.587  1.00 28.19      1SG 
ATOM   2841  O   LEU   179      19.695  49.959  47.709  1.00 27.66      1SG 
ATOM   2842  N   GLN   180      21.291  51.454  47.216  1.00 27.85      1SG 
ATOM   2843  HN  GLN   180      22.253  51.702  47.137  1.00   .00      1SG 
ATOM   2844  CA  GLN   180      20.319  52.483  46.903  1.00 28.88      1SG 
ATOM   2845  HA  GLN   180      19.383  52.214  47.369  1.00   .00      1SG 
ATOM   2846  CB  GLN   180      20.795  53.830  47.413  1.00 26.74      1SG 
ATOM   2847  HB1 GLN   180      19.993  54.578  47.239  1.00   .00      1SG 
ATOM   2848  HB2 GLN   180      21.697  54.128  46.838  1.00   .00      1SG 
ATOM   2849  CG  GLN   180      21.140  53.827  48.882  1.00 28.23      1SG 
ATOM   2850  HG1 GLN   180      22.013  53.161  49.051  1.00   .00      1SG 
ATOM   2851  HG2 GLN   180      20.272  53.444  49.460  1.00   .00      1SG 
ATOM   2852  CD  GLN   180      21.483  55.217  49.381  1.00 29.62      1SG 
ATOM   2853  OE1 GLN   180      22.444  55.403  50.123  1.00 28.20      1SG 
ATOM   2854  NE2 GLN   180      20.697  56.198  48.968  1.00 27.85      1SG 
ATOM   2855 HE21 GLN   180      20.872  57.137  49.263  1.00   .00      1SG 
ATOM   2856 HE22 GLN   180      19.928  56.000  48.361  1.00   .00      1SG 
ATOM   2857  C   GLN   180      20.151  52.546  45.403  1.00 32.94      1SG 
ATOM   2858  O   GLN   180      20.201  53.618  44.813  1.00 37.62      1SG 
ATOM   2859  N   ARG   181      19.954  51.396  44.785  1.00 31.21      1SG 
ATOM   2860  HN  ARG   181      19.908  50.523  45.265  1.00   .00      1SG 
ATOM   2861  CA  ARG   181      19.792  51.362  43.334  1.00 29.81      1SG 
ATOM   2862  HA  ARG   181      19.748  52.380  42.977  1.00   .00      1SG 
ATOM   2863  CB  ARG   181      20.953  50.626  42.690  1.00 34.57      1SG 
ATOM   2864  HB1 ARG   181      21.892  50.903  43.215  1.00   .00      1SG 
ATOM   2865  HB2 ARG   181      21.031  50.936  41.626  1.00   .00      1SG 
ATOM   2866  CG  ARG   181      20.778  49.097  42.753  1.00 35.67      1SG 
ATOM   2867  HG1 ARG   181      19.879  48.811  42.166  1.00   .00      1SG 
ATOM   2868  HG2 ARG   181      20.629  48.793  43.811  1.00   .00      1SG 
ATOM   2869  CD  ARG   181      21.987  48.369  42.194  1.00 39.44      1SG 
ATOM   2870  HD1 ARG   181      22.768  48.291  42.981  1.00   .00      1SG 
ATOM   2871  HD2 ARG   181      22.382  48.927  41.318  1.00   .00      1SG 
ATOM   2872  NE  ARG   181      21.679  47.012  41.746  1.00 43.14      1SG 
ATOM   2873  HE  ARG   181      21.491  46.883  40.774  1.00   .00      1SG 
ATOM   2874  CZ  ARG   181      21.628  45.933  42.525  1.00 43.01      1SG 
ATOM   2875  NH1 ARG   181      21.864  46.016  43.830  1.00 35.34      1SG 
ATOM   2876 HH11 ARG   181      21.936  46.912  44.269  1.00   .00      1SG 
ATOM   2877 HH12 ARG   181      21.969  45.183  44.373  1.00   .00      1SG 
ATOM   2878  NH2 ARG   181      21.359  44.753  41.982  1.00 39.24      1SG 
ATOM   2879 HH21 ARG   181      21.197  44.681  40.998  1.00   .00      1SG 
ATOM   2880 HH22 ARG   181      21.318  43.936  42.557  1.00   .00      1SG 
ATOM   2881  C   ARG   181      18.547  50.580  43.022  1.00 30.30      1SG 
ATOM   2882  O   ARG   181      18.018  49.850  43.863  1.00 30.72      1SG 
ATOM   2883  N   THR   182      18.046  50.760  41.815  1.00 24.51      1SG 
ATOM   2884  HN  THR   182      18.405  51.423  41.163  1.00   .00      1SG 
ATOM   2885  CA  THR   182      16.921  49.965  41.402  1.00 26.14      1SG 
ATOM   2886  HA  THR   182      16.860  49.117  42.068  1.00   .00      1SG 
ATOM   2887  CB  THR   182      15.591  50.755  41.434  1.00 31.61      1SG 
ATOM   2888  HB  THR   182      14.752  50.095  41.127  1.00   .00      1SG 
ATOM   2889  OG1 THR   182      15.666  51.861  40.532  1.00 31.90      1SG 
ATOM   2890  HG1 THR   182      16.125  51.537  39.754  1.00   .00      1SG 
ATOM   2891  CG2 THR   182      15.308  51.268  42.838  1.00 28.19      1SG 
ATOM   2892 HG21 THR   182      16.127  51.940  43.171  1.00   .00      1SG 
ATOM   2893 HG22 THR   182      15.239  50.414  43.546  1.00   .00      1SG 
ATOM   2894 HG23 THR   182      14.355  51.839  42.847  1.00   .00      1SG 
ATOM   2895  C   THR   182      17.289  49.574  39.979  1.00 27.37      1SG 
ATOM   2896  O   THR   182      17.857  50.379  39.221  1.00 28.38      1SG 
ATOM   2897  N   ASP   183      17.048  48.319  39.640  1.00 22.85      1SG 
ATOM   2898  HN  ASP   183      16.677  47.653  40.282  1.00   .00      1SG 
ATOM   2899  CA  ASP   183      17.318  47.842  38.291  1.00 25.16      1SG 
ATOM   2900  HA  ASP   183      17.768  48.652  37.737  1.00   .00      1SG 
ATOM   2901  CB  ASP   183      18.255  46.626  38.304  1.00 26.64      1SG 
ATOM   2902  HB1 ASP   183      18.301  46.195  37.281  1.00   .00      1SG 
ATOM   2903  HB2 ASP   183      17.848  45.865  39.003  1.00   .00      1SG 
ATOM   2904  CG  ASP   183      19.672  46.978  38.744  1.00 32.97      1SG 
ATOM   2905  OD1 ASP   183      20.187  48.023  38.301  1.00 38.13      1SG 
ATOM   2906  OD2 ASP   183      20.276  46.202  39.510  1.00 36.31      1SG 
ATOM   2907  C   ASP   183      15.951  47.442  37.767  1.00 26.15      1SG 
ATOM   2908  O   ASP   183      15.340  46.492  38.263  1.00 19.56      1SG 
ATOM   2909  N   ALA   184      15.444  48.196  36.798  1.00 25.45      1SG 
ATOM   2910  HN  ALA   184      15.928  48.984  36.426  1.00   .00      1SG 
ATOM   2911  CA  ALA   184      14.144  47.909  36.224  1.00 23.59      1SG 
ATOM   2912  HA  ALA   184      13.435  47.813  37.033  1.00   .00      1SG 
ATOM   2913  CB  ALA   184      13.712  49.041  35.261  1.00 28.44      1SG 
ATOM   2914  HB1 ALA   184      14.449  49.142  34.436  1.00   .00      1SG 
ATOM   2915  HB2 ALA   184      13.660  50.005  35.810  1.00   .00      1SG 
ATOM   2916  HB3 ALA   184      12.719  48.806  34.823  1.00   .00      1SG 
ATOM   2917  C   ALA   184      14.195  46.586  35.486  1.00 22.42      1SG 
ATOM   2918  O   ALA   184      15.210  46.204  34.902  1.00 21.79      1SG 
ATOM   2919  N   PRO   185      13.098  45.848  35.515  1.00 21.61      1SG 
ATOM   2920  CD  PRO   185      11.827  46.062  36.228  1.00 20.01      1SG 
ATOM   2921  HD1 PRO   185      11.498  47.117  36.124  1.00   .00      1SG 
ATOM   2922  HD2 PRO   185      11.936  45.802  37.301  1.00   .00      1SG 
ATOM   2923  CA  PRO   185      13.115  44.566  34.814  1.00 19.52      1SG 
ATOM   2924  HA  PRO   185      13.998  44.005  35.075  1.00   .00      1SG 
ATOM   2925  CB  PRO   185      11.789  43.917  35.245  1.00 23.81      1SG 
ATOM   2926  HB1 PRO   185      11.922  43.313  36.167  1.00   .00      1SG 
ATOM   2927  HB2 PRO   185      11.385  43.264  34.443  1.00   .00      1SG 
ATOM   2928  CG  PRO   185      10.882  45.090  35.494  1.00 22.88      1SG 
ATOM   2929  HG1 PRO   185      10.507  45.525  34.543  1.00   .00      1SG 
ATOM   2930  HG2 PRO   185      10.015  44.808  36.127  1.00   .00      1SG 
ATOM   2931  C   PRO   185      13.192  44.711  33.301  1.00 20.60      1SG 
ATOM   2932  O   PRO   185      12.643  45.656  32.739  1.00 20.47      1SG 
ATOM   2933  N   LYS   186      13.888  43.775  32.664  1.00 21.09      1SG 
ATOM   2934  HN  LYS   186      14.386  43.070  33.163  1.00   .00      1SG 
ATOM   2935  CA  LYS   186      13.984  43.697  31.208  1.00 21.36      1SG 
ATOM   2936  HA  LYS   186      13.858  44.692  30.808  1.00   .00      1SG 
ATOM   2937  CB  LYS   186      15.338  43.128  30.805  1.00 22.40      1SG 
ATOM   2938  HB1 LYS   186      15.352  42.995  29.703  1.00   .00      1SG 
ATOM   2939  HB2 LYS   186      15.463  42.136  31.289  1.00   .00      1SG 
ATOM   2940  CG  LYS   186      16.515  44.014  31.202  1.00 30.52      1SG 
ATOM   2941  HG1 LYS   186      16.435  44.279  32.278  1.00   .00      1SG 
ATOM   2942  HG2 LYS   186      16.497  44.948  30.600  1.00   .00      1SG 
ATOM   2943  CD  LYS   186      17.837  43.265  30.953  1.00 40.37      1SG 
ATOM   2944  HD1 LYS   186      17.813  42.827  29.933  1.00   .00      1SG 
ATOM   2945  HD2 LYS   186      17.927  42.443  31.695  1.00   .00      1SG 
ATOM   2946  CE  LYS   186      19.073  44.178  31.072  1.00 45.68      1SG 
ATOM   2947  HE1 LYS   186      19.025  44.966  30.291  1.00   .00      1SG 
ATOM   2948  HE2 LYS   186      19.994  43.570  30.945  1.00   .00      1SG 
ATOM   2949  NZ  LYS   186      19.172  44.863  32.388  1.00 50.21      1SG 
ATOM   2950  HZ1 LYS   186      19.402  44.167  33.125  1.00   .00      1SG 
ATOM   2951  HZ2 LYS   186      18.264  45.317  32.612  1.00   .00      1SG 
ATOM   2952  HZ3 LYS   186      19.919  45.585  32.348  1.00   .00      1SG 
ATOM   2953  C   LYS   186      12.859  42.696  30.929  1.00 23.32      1SG 
ATOM   2954  O   LYS   186      12.900  41.572  31.409  1.00 20.10      1SG 
ATOM   2955  N   THR   187      11.848  43.098  30.166  1.00 20.33      1SG 
ATOM   2956  HN  THR   187      11.825  43.987  29.715  1.00   .00      1SG 
ATOM   2957  CA  THR   187      10.712  42.223  29.963  1.00 21.65      1SG 
ATOM   2958  HA  THR   187      10.867  41.327  30.546  1.00   .00      1SG 
ATOM   2959  CB  THR   187       9.395  42.945  30.408  1.00 23.61      1SG 
ATOM   2960  HB  THR   187       8.525  42.267  30.273  1.00   .00      1SG 
ATOM   2961  OG1 THR   187       9.209  44.116  29.601  1.00 23.06      1SG 
ATOM   2962  HG1 THR   187       9.308  43.828  28.691  1.00   .00      1SG 
ATOM   2963  CG2 THR   187       9.475  43.383  31.892  1.00 21.98      1SG 
ATOM   2964 HG21 THR   187      10.325  44.084  32.038  1.00   .00      1SG 
ATOM   2965 HG22 THR   187       9.632  42.495  32.540  1.00   .00      1SG 
ATOM   2966 HG23 THR   187       8.536  43.898  32.185  1.00   .00      1SG 
ATOM   2967  C   THR   187      10.503  41.751  28.539  1.00 20.25      1SG 
ATOM   2968  O   THR   187      10.940  42.399  27.583  1.00 20.02      1SG 
ATOM   2969  N   HSE   188       9.843  40.604  28.418  1.00 18.01      1SG 
ATOM   2970  HN  HSE   188       9.571  40.059  29.207  1.00   .00      1SG 
ATOM   2971  CA  HSE   188       9.477  40.076  27.111  1.00 19.87      1SG 
ATOM   2972  HA  HSE   188       9.028  40.883  26.552  1.00   .00      1SG 
ATOM   2973  CB  HSE   188      10.681  39.505  26.326  1.00 16.55      1SG 
ATOM   2974  HB1 HSE   188      11.493  40.262  26.327  1.00   .00      1SG 
ATOM   2975  HB2 HSE   188      10.361  39.314  25.280  1.00   .00      1SG 
ATOM   2976  ND1 HSE   188      12.201  38.196  27.865  1.00 17.20      1SG 
ATOM   2977  CG  HSE   188      11.237  38.225  26.883  1.00 18.92      1SG 
ATOM   2978  CE1 HSE   188      12.505  36.938  28.140  1.00 18.11      1SG 
ATOM   2979  HE1 HSE   188      13.232  36.583  28.870  1.00   .00      1SG 
ATOM   2980  NE2 HSE   188      11.772  36.153  27.372  1.00 21.06      1SG 
ATOM   2981  HE2 HSE   188      11.786  35.153  27.362  1.00   .00      1SG 
ATOM   2982  CD2 HSE   188      10.974  36.934  26.576  1.00 19.06      1SG 
ATOM   2983  HD2 HSE   188      10.279  36.529  25.851  1.00   .00      1SG 
ATOM   2984  C   HSE   188       8.417  39.002  27.278  1.00 18.23      1SG 
ATOM   2985  O   HSE   188       8.063  38.620  28.389  1.00 17.35      1SG 
ATOM   2986  N   MET   189       7.909  38.515  26.159  1.00 14.80      1SG 
ATOM   2987  HN  MET   189       8.182  38.832  25.254  1.00   .00      1SG 
ATOM   2988  CA  MET   189       6.907  37.471  26.218  1.00 17.95      1SG 
ATOM   2989  HA  MET   189       6.869  37.086  27.226  1.00   .00      1SG 
ATOM   2990  CB  MET   189       5.552  38.071  25.811  1.00 23.06      1SG 
ATOM   2991  HB1 MET   189       5.574  38.272  24.719  1.00   .00      1SG 
ATOM   2992  HB2 MET   189       5.420  39.032  26.352  1.00   .00      1SG 
ATOM   2993  CG  MET   189       4.367  37.200  26.105  1.00 28.43      1SG 
ATOM   2994  HG1 MET   189       4.316  37.001  27.197  1.00   .00      1SG 
ATOM   2995  HG2 MET   189       4.484  36.228  25.580  1.00   .00      1SG 
ATOM   2996  SD  MET   189       2.848  38.047  25.543  1.00 32.02      1SG 
ATOM   2997  CE  MET   189       2.901  39.509  26.537  1.00 26.93      1SG 
ATOM   2998  HE1 MET   189       3.600  40.261  26.112  1.00   .00      1SG 
ATOM   2999  HE2 MET   189       3.245  39.262  27.564  1.00   .00      1SG 
ATOM   3000  HE3 MET   189       1.893  39.971  26.593  1.00   .00      1SG 
ATOM   3001  C   MET   189       7.283  36.348  25.262  1.00 18.90      1SG 
ATOM   3002  O   MET   189       7.970  36.582  24.257  1.00 21.67      1SG 
ATOM   3003  N   THR   190       6.880  35.125  25.587  1.00 15.72      1SG 
ATOM   3004  HN  THR   190       6.420  34.920  26.447  1.00   .00      1SG 
ATOM   3005  CA  THR   190       7.098  34.015  24.684  1.00 15.18      1SG 
ATOM   3006  HA  THR   190       7.526  34.424  23.781  1.00   .00      1SG 
ATOM   3007  CB  THR   190       8.024  32.903  25.229  1.00 18.15      1SG 
ATOM   3008  HB  THR   190       8.085  32.071  24.496  1.00   .00      1SG 
ATOM   3009  OG1 THR   190       7.505  32.396  26.465  1.00 19.39      1SG 
ATOM   3010  HG1 THR   190       8.119  31.715  26.750  1.00   .00      1SG 
ATOM   3011  CG2 THR   190       9.441  33.438  25.408  1.00 18.25      1SG 
ATOM   3012 HG21 THR   190       9.441  34.287  26.125  1.00   .00      1SG 
ATOM   3013 HG22 THR   190       9.836  33.797  24.433  1.00   .00      1SG 
ATOM   3014 HG23 THR   190      10.100  32.637  25.806  1.00   .00      1SG 
ATOM   3015  C   THR   190       5.722  33.423  24.440  1.00 19.86      1SG 
ATOM   3016  O   THR   190       4.805  33.612  25.236  1.00 20.97      1SG 
ATOM   3017  N   HSE   191       5.601  32.702  23.340  1.00 20.21      1SG 
ATOM   3018  HN  HSE   191       6.375  32.526  22.737  1.00   .00      1SG 
ATOM   3019  CA  HSE   191       4.318  32.111  22.931  1.00 20.03      1SG 
ATOM   3020  HA  HSE   191       3.670  32.071  23.794  1.00   .00      1SG 
ATOM   3021  CB  HSE   191       3.695  32.979  21.821  1.00 22.04      1SG 
ATOM   3022  HB1 HSE   191       4.448  33.119  21.016  1.00   .00      1SG 
ATOM   3023  HB2 HSE   191       3.432  33.968  22.251  1.00   .00      1SG 
ATOM   3024  ND1 HSE   191       2.499  31.303  20.372  1.00 33.31      1SG 
ATOM   3025  CG  HSE   191       2.463  32.395  21.209  1.00 27.29      1SG 
ATOM   3026  CE1 HSE   191       1.270  31.011  19.977  1.00 32.00      1SG 
ATOM   3027  HE1 HSE   191        .969  30.202  19.312  1.00   .00      1SG 
ATOM   3028  NE2 HSE   191        .440  31.875  20.528  1.00 30.61      1SG 
ATOM   3029  HE2 HSE   191       -.552  31.901  20.409  1.00   .00      1SG 
ATOM   3030  CD2 HSE   191       1.160  32.752  21.306  1.00 34.10      1SG 
ATOM   3031  HD2 HSE   191        .708  33.559  21.869  1.00   .00      1SG 
ATOM   3032  C   HSE   191       4.609  30.710  22.429  1.00 20.54      1SG 
ATOM   3033  O   HSE   191       5.409  30.518  21.506  1.00 21.63      1SG 
ATOM   3034  N   HSE   192       3.991  29.718  23.066  1.00 22.31      1SG 
ATOM   3035  HN  HSE   192       3.370  29.875  23.830  1.00   .00      1SG 
ATOM   3036  CA  HSE   192       4.196  28.339  22.670  1.00 23.03      1SG 
ATOM   3037  HA  HSE   192       4.568  28.334  21.656  1.00   .00      1SG 
ATOM   3038  CB  HSE   192       5.195  27.648  23.607  1.00 23.69      1SG 
ATOM   3039  HB1 HSE   192       5.241  26.570  23.345  1.00   .00      1SG 
ATOM   3040  HB2 HSE   192       4.835  27.755  24.652  1.00   .00      1SG 
ATOM   3041  ND1 HSE   192       6.990  29.269  24.304  1.00 22.25      1SG 
ATOM   3042  CG  HSE   192       6.579  28.208  23.529  1.00 20.87      1SG 
ATOM   3043  CE1 HSE   192       8.246  29.564  24.009  1.00 22.76      1SG 
ATOM   3044  HE1 HSE   192       8.856  30.352  24.449  1.00   .00      1SG 
ATOM   3045  NE2 HSE   192       8.660  28.731  23.070  1.00 24.08      1SG 
ATOM   3046  HE2 HSE   192       9.567  28.717  22.650  1.00   .00      1SG 
ATOM   3047  CD2 HSE   192       7.638  27.872  22.752  1.00 23.50      1SG 
ATOM   3048  HD2 HSE   192       7.725  27.090  22.008  1.00   .00      1SG 
ATOM   3049  C   HSE   192       2.883  27.584  22.701  1.00 25.89      1SG 
ATOM   3050  O   HSE   192       2.171  27.596  23.711  1.00 24.28      1SG 
ATOM   3051  N   ALA   193       2.587  26.896  21.608  1.00 28.25      1SG 
ATOM   3052  HN  ALA   193       3.184  26.875  20.810  1.00   .00      1SG 
ATOM   3053  CA  ALA   193       1.346  26.120  21.519  1.00 30.32      1SG 
ATOM   3054  HA  ALA   193        .522  26.770  21.774  1.00   .00      1SG 
ATOM   3055  CB  ALA   193       1.173  25.569  20.104  1.00 32.15      1SG 
ATOM   3056  HB1 ALA   193       2.028  24.910  19.844  1.00   .00      1SG 
ATOM   3057  HB2 ALA   193       1.136  26.406  19.374  1.00   .00      1SG 
ATOM   3058  HB3 ALA   193        .236  24.976  20.041  1.00   .00      1SG 
ATOM   3059  C   ALA   193       1.403  24.968  22.494  1.00 31.24      1SG 
ATOM   3060  O   ALA   193       2.463  24.370  22.676  1.00 33.97      1SG 
ATOM   3061  N   VAL   194        .271  24.661  23.119  1.00 34.25      1SG 
ATOM   3062  HN  VAL   194       -.569  25.180  22.984  1.00   .00      1SG 
ATOM   3063  CA  VAL   194        .194  23.537  24.045  1.00 40.60      1SG 
ATOM   3064  HA  VAL   194       1.203  23.263  24.314  1.00   .00      1SG 
ATOM   3065  CB  VAL   194       -.621  23.893  25.323  1.00 42.11      1SG 
ATOM   3066  HB  VAL   194       -.303  23.236  26.160  1.00   .00      1SG 
ATOM   3067  CG1 VAL   194       -.385  25.351  25.703  1.00 45.47      1SG 
ATOM   3068 HG11 VAL   194       -.866  26.022  24.960  1.00   .00      1SG 
ATOM   3069 HG12 VAL   194        .705  25.565  25.721  1.00   .00      1SG 
ATOM   3070 HG13 VAL   194       -.823  25.557  26.703  1.00   .00      1SG 
ATOM   3071  CG2 VAL   194      -2.098  23.628  25.117  1.00 47.74      1SG 
ATOM   3072 HG21 VAL   194      -2.286  22.534  25.063  1.00   .00      1SG 
ATOM   3073 HG22 VAL   194      -2.437  24.093  24.167  1.00   .00      1SG 
ATOM   3074 HG23 VAL   194      -2.679  24.046  25.966  1.00   .00      1SG 
ATOM   3075  C   VAL   194       -.493  22.407  23.265  1.00 43.61      1SG 
ATOM   3076  O   VAL   194       -.281  21.223  23.526  1.00 44.02      1SG 
ATOM   3077  N   SER   195      -1.300  22.805  22.287  1.00 45.95      1SG 
ATOM   3078  HN  SER   195      -1.453  23.772  22.101  1.00   .00      1SG 
ATOM   3079  CA  SER   195      -2.018  21.880  21.417  1.00 48.81      1SG 
ATOM   3080  HA  SER   195      -1.339  21.087  21.143  1.00   .00      1SG 
ATOM   3081  CB  SER   195      -3.248  21.303  22.121  1.00 46.55      1SG 
ATOM   3082  HB1 SER   195      -2.957  20.902  23.115  1.00   .00      1SG 
ATOM   3083  HB2 SER   195      -3.683  20.487  21.506  1.00   .00      1SG 
ATOM   3084  OG  SER   195      -4.227  22.306  22.304  1.00 48.44      1SG 
ATOM   3085  HG1 SER   195      -4.804  21.988  23.002  1.00   .00      1SG 
ATOM   3086  C   SER   195      -2.476  22.646  20.189  1.00 50.32      1SG 
ATOM   3087  O   SER   195      -2.113  23.802  19.987  1.00 46.45      1SG 
ATOM   3088  N   ASP   196      -3.294  21.991  19.374  1.00 53.51      1SG 
ATOM   3089  HN  ASP   196      -3.586  21.055  19.555  1.00   .00      1SG 
ATOM   3090  CA  ASP   196      -3.813  22.600  18.168  1.00 55.75      1SG 
ATOM   3091  HA  ASP   196      -2.997  23.083  17.651  1.00   .00      1SG 
ATOM   3092  CB  ASP   196      -4.444  21.516  17.288  1.00 61.06      1SG 
ATOM   3093  HB1 ASP   196      -3.677  21.132  16.582  1.00   .00      1SG 
ATOM   3094  HB2 ASP   196      -5.282  21.961  16.710  1.00   .00      1SG 
ATOM   3095  CG  ASP   196      -4.986  20.341  18.103  1.00 68.28      1SG 
ATOM   3096  OD1 ASP   196      -4.202  19.717  18.859  1.00 69.50      1SG 
ATOM   3097  OD2 ASP   196      -6.192  20.033  17.988  1.00 69.92      1SG 
ATOM   3098  C   ASP   196      -4.829  23.692  18.480  1.00 53.81      1SG 
ATOM   3099  O   ASP   196      -5.172  24.486  17.609  1.00 56.28      1SG 
ATOM   3100  N   HSE   197      -5.284  23.759  19.726  1.00 51.39      1SG 
ATOM   3101  HN  HSE   197      -4.968  23.149  20.449  1.00   .00      1SG 
ATOM   3102  CA  HSE   197      -6.288  24.751  20.095  1.00 51.83      1SG 
ATOM   3103  HA  HSE   197      -6.471  25.386  19.241  1.00   .00      1SG 
ATOM   3104  CB  HSE   197      -7.568  24.036  20.518  1.00 58.35      1SG 
ATOM   3105  HB1 HSE   197      -8.396  24.775  20.548  1.00   .00      1SG 
ATOM   3106  HB2 HSE   197      -7.420  23.612  21.534  1.00   .00      1SG 
ATOM   3107  ND1 HSE   197      -8.155  23.112  18.248  1.00 68.64      1SG 
ATOM   3108  CG  HSE   197      -7.965  22.926  19.600  1.00 64.69      1SG 
ATOM   3109  CE1 HSE   197      -8.506  21.965  17.693  1.00 71.00      1SG 
ATOM   3110  HE1 HSE   197      -8.727  21.785  16.642  1.00   .00      1SG 
ATOM   3111  NE2 HSE   197      -8.549  21.042  18.637  1.00 70.41      1SG 
ATOM   3112  HE2 HSE   197      -8.785  20.078  18.512  1.00   .00      1SG 
ATOM   3113  CD2 HSE   197      -8.214  21.617  19.839  1.00 67.59      1SG 
ATOM   3114  HD2 HSE   197      -8.175  21.069  20.772  1.00   .00      1SG 
ATOM   3115  C   HSE   197      -5.893  25.712  21.208  1.00 48.02      1SG 
ATOM   3116  O   HSE   197      -6.628  26.649  21.512  1.00 42.70      1SG 
ATOM   3117  N   GLU   198      -4.739  25.480  21.817  1.00 44.31      1SG 
ATOM   3118  HN  GLU   198      -4.126  24.741  21.547  1.00   .00      1SG 
ATOM   3119  CA  GLU   198      -4.309  26.312  22.930  1.00 40.32      1SG 
ATOM   3120  HA  GLU   198      -4.869  27.235  22.906  1.00   .00      1SG 
ATOM   3121  CB  GLU   198      -4.566  25.555  24.231  1.00 42.36      1SG 
ATOM   3122  HB1 GLU   198      -3.608  25.489  24.789  1.00   .00      1SG 
ATOM   3123  HB2 GLU   198      -4.905  24.530  23.974  1.00   .00      1SG 
ATOM   3124  CG  GLU   198      -5.599  26.181  25.139  1.00 49.13      1SG 
ATOM   3125  HG1 GLU   198      -6.422  26.593  24.517  1.00   .00      1SG 
ATOM   3126  HG2 GLU   198      -5.123  27.007  25.709  1.00   .00      1SG 
ATOM   3127  CD  GLU   198      -6.200  25.182  26.141  1.00 49.21      1SG 
ATOM   3128  OE1 GLU   198      -5.551  24.159  26.481  1.00 49.46      1SG 
ATOM   3129  OE2 GLU   198      -7.329  25.440  26.598  1.00 47.25      1SG 
ATOM   3130  C   GLU   198      -2.836  26.687  22.855  1.00 35.08      1SG 
ATOM   3131  O   GLU   198      -2.034  25.961  22.262  1.00 32.19      1SG 
ATOM   3132  N   ALA   199      -2.496  27.816  23.473  1.00 33.01      1SG 
ATOM   3133  HN  ALA   199      -3.168  28.389  23.935  1.00   .00      1SG 
ATOM   3134  CA  ALA   199      -1.111  28.289  23.513  1.00 32.53      1SG 
ATOM   3135  HA  ALA   199       -.462  27.442  23.348  1.00   .00      1SG 
ATOM   3136  CB  ALA   199       -.882  29.343  22.451  1.00 29.72      1SG 
ATOM   3137  HB1 ALA   199      -1.558  30.208  22.620  1.00   .00      1SG 
ATOM   3138  HB2 ALA   199      -1.092  28.919  21.446  1.00   .00      1SG 
ATOM   3139  HB3 ALA   199        .169  29.701  22.494  1.00   .00      1SG 
ATOM   3140  C   ALA   199       -.780  28.873  24.885  1.00 29.97      1SG 
ATOM   3141  O   ALA   199      -1.647  29.419  25.564  1.00 28.79      1SG 
ATOM   3142  N   THR   200        .483  28.762  25.286  1.00 24.96      1SG 
ATOM   3143  HN  THR   200       1.183  28.308  24.741  1.00   .00      1SG 
ATOM   3144  CA  THR   200        .907  29.313  26.571  1.00 22.93      1SG 
ATOM   3145  HA  THR   200        .034  29.374  27.204  1.00   .00      1SG 
ATOM   3146  CB  THR   200       1.978  28.458  27.243  1.00 24.00      1SG 
ATOM   3147  HB  THR   200       2.887  28.422  26.605  1.00   .00      1SG 
ATOM   3148  OG1 THR   200       1.490  27.125  27.431  1.00 27.47      1SG 
ATOM   3149  HG1 THR   200       1.284  26.792  26.554  1.00   .00      1SG 
ATOM   3150  CG2 THR   200       2.366  29.086  28.598  1.00 25.10      1SG 
ATOM   3151 HG21 THR   200       1.453  29.308  29.191  1.00   .00      1SG 
ATOM   3152 HG22 THR   200       2.920  30.034  28.430  1.00   .00      1SG 
ATOM   3153 HG23 THR   200       3.000  28.379  29.175  1.00   .00      1SG 
ATOM   3154  C   THR   200       1.576  30.640  26.296  1.00 19.20      1SG 
ATOM   3155  O   THR   200       2.458  30.697  25.462  1.00 22.31      1SG 
ATOM   3156  N   LEU   201       1.136  31.707  26.952  1.00 21.01      1SG 
ATOM   3157  HN  LEU   201        .354  31.677  27.569  1.00   .00      1SG 
ATOM   3158  CA  LEU   201       1.800  33.000  26.789  1.00 20.31      1SG 
ATOM   3159  HA  LEU   201       2.402  32.946  25.894  1.00   .00      1SG 
ATOM   3160  CB  LEU   201        .808  34.159  26.679  1.00 17.64      1SG 
ATOM   3161  HB1 LEU   201       1.368  35.097  26.874  1.00   .00      1SG 
ATOM   3162  HB2 LEU   201        .045  34.021  27.473  1.00   .00      1SG 
ATOM   3163  CG  LEU   201        .068  34.333  25.356  1.00 24.42      1SG 
ATOM   3164  HG  LEU   201       -.567  33.444  25.152  1.00   .00      1SG 
ATOM   3165  CD1 LEU   201       -.784  35.559  25.481  1.00 22.92      1SG 
ATOM   3166 HD11 LEU   201       -.148  36.447  25.686  1.00   .00      1SG 
ATOM   3167 HD12 LEU   201      -1.502  35.436  26.319  1.00   .00      1SG 
ATOM   3168 HD13 LEU   201      -1.340  35.732  24.534  1.00   .00      1SG 
ATOM   3169  CD2 LEU   201       1.074  34.492  24.190  1.00 22.88      1SG 
ATOM   3170 HD21 LEU   201       1.463  33.498  23.883  1.00   .00      1SG 
ATOM   3171 HD22 LEU   201       1.929  35.124  24.512  1.00   .00      1SG 
ATOM   3172 HD23 LEU   201        .571  34.960  23.317  1.00   .00      1SG 
ATOM   3173  C   LEU   201       2.539  33.159  28.118  1.00 21.50      1SG 
ATOM   3174  O   LEU   201       1.922  33.036  29.187  1.00 21.32      1SG 
ATOM   3175  N   ARG   202       3.831  33.427  28.054  1.00 18.68      1SG 
ATOM   3176  HN  ARG   202       4.323  33.515  27.191  1.00   .00      1SG 
ATOM   3177  CA  ARG   202       4.610  33.610  29.280  1.00 17.31      1SG 
ATOM   3178  HA  ARG   202       3.935  33.540  30.120  1.00   .00      1SG 
ATOM   3179  CB  ARG   202       5.697  32.544  29.381  1.00 16.86      1SG 
ATOM   3180  HB1 ARG   202       6.395  32.662  28.526  1.00   .00      1SG 
ATOM   3181  HB2 ARG   202       5.222  31.542  29.322  1.00   .00      1SG 
ATOM   3182  CG  ARG   202       6.494  32.637  30.686  1.00 18.48      1SG 
ATOM   3183  HG1 ARG   202       5.794  32.691  31.547  1.00   .00      1SG 
ATOM   3184  HG2 ARG   202       7.122  33.554  30.675  1.00   .00      1SG 
ATOM   3185  CD  ARG   202       7.406  31.379  30.830  1.00 20.98      1SG 
ATOM   3186  HD1 ARG   202       8.125  31.526  31.664  1.00   .00      1SG 
ATOM   3187  HD2 ARG   202       7.954  31.198  29.881  1.00   .00      1SG 
ATOM   3188  NE  ARG   202       6.609  30.184  31.126  1.00 21.71      1SG 
ATOM   3189  HE  ARG   202       6.201  30.119  32.035  1.00   .00      1SG 
ATOM   3190  CZ  ARG   202       6.384  29.178  30.283  1.00 26.53      1SG 
ATOM   3191  NH1 ARG   202       6.895  29.190  29.062  1.00 23.46      1SG 
ATOM   3192 HH11 ARG   202       7.458  29.961  28.763  1.00   .00      1SG 
ATOM   3193 HH12 ARG   202       6.718  28.428  28.439  1.00   .00      1SG 
ATOM   3194  NH2 ARG   202       5.628  28.156  30.670  1.00 28.79      1SG 
ATOM   3195 HH21 ARG   202       5.233  28.146  31.588  1.00   .00      1SG 
ATOM   3196 HH22 ARG   202       5.454  27.397  30.043  1.00   .00      1SG 
ATOM   3197  C   ARG   202       5.232  34.991  29.278  1.00 17.39      1SG 
ATOM   3198  O   ARG   202       5.927  35.377  28.335  1.00 20.21      1SG 
ATOM   3199  N   CYS   203       4.972  35.723  30.355  1.00 15.93      1SG 
ATOM   3200  HN  CYS   203       4.423  35.360  31.103  1.00   .00      1SG 
ATOM   3201  CA  CYS   203       5.446  37.079  30.542  1.00 13.25      1SG 
ATOM   3202  HA  CYS   203       5.619  37.521  29.572  1.00   .00      1SG 
ATOM   3203  CB  CYS   203       4.384  37.858  31.313  1.00 19.88      1SG 
ATOM   3204  HB1 CYS   203       4.374  37.507  32.367  1.00   .00      1SG 
ATOM   3205  HB2 CYS   203       3.389  37.648  30.867  1.00   .00      1SG 
ATOM   3206  SG  CYS   203       4.714  39.609  31.261  1.00 32.95      1SG 
ATOM   3207  HG1 CYS   203       5.783  39.548  32.042  1.00   .00      1SG 
ATOM   3208  C   CYS   203       6.697  36.955  31.431  1.00 20.18      1SG 
ATOM   3209  O   CYS   203       6.614  36.366  32.516  1.00 19.70      1SG 
ATOM   3210  N   TRP   204       7.816  37.518  30.977  1.00 15.29      1SG 
ATOM   3211  HN  TRP   204       7.827  38.040  30.128  1.00   .00      1SG 
ATOM   3212  CA  TRP   204       9.099  37.421  31.669  1.00 17.10      1SG 
ATOM   3213  HA  TRP   204       8.975  36.766  32.519  1.00   .00      1SG 
ATOM   3214  CB  TRP   204      10.176  36.866  30.712  1.00 12.28      1SG 
ATOM   3215  HB1 TRP   204      11.169  37.025  31.183  1.00   .00      1SG 
ATOM   3216  HB2 TRP   204      10.124  37.443  29.765  1.00   .00      1SG 
ATOM   3217  CG  TRP   204      10.071  35.437  30.368  1.00 18.25      1SG 
ATOM   3218  CD1 TRP   204       9.371  34.876  29.331  1.00 19.60      1SG 
ATOM   3219  HD1 TRP   204       8.737  35.420  28.647  1.00   .00      1SG 
ATOM   3220  NE1 TRP   204       9.594  33.517  29.289  1.00 18.74      1SG 
ATOM   3221  HE1 TRP   204       9.213  32.899  28.637  1.00   .00      1SG 
ATOM   3222  CE2 TRP   204      10.437  33.176  30.312  1.00 21.93      1SG 
ATOM   3223  CD2 TRP   204      10.757  34.364  31.015  1.00 21.54      1SG 
ATOM   3224  CE3 TRP   204      11.614  34.291  32.121  1.00 24.95      1SG 
ATOM   3225  HE3 TRP   204      11.885  35.169  32.689  1.00   .00      1SG 
ATOM   3226  CZ3 TRP   204      12.127  33.038  32.489  1.00 24.81      1SG 
ATOM   3227  HZ3 TRP   204      12.790  32.962  33.338  1.00   .00      1SG 
ATOM   3228  CZ2 TRP   204      10.949  31.926  30.681  1.00 24.08      1SG 
ATOM   3229  HZ2 TRP   204      10.704  31.021  30.145  1.00   .00      1SG 
ATOM   3230  CH2 TRP   204      11.791  31.884  31.769  1.00 25.55      1SG 
ATOM   3231  HH2 TRP   204      12.204  30.935  32.076  1.00   .00      1SG 
ATOM   3232  C   TRP   204       9.618  38.750  32.172  1.00 18.10      1SG 
ATOM   3233  O   TRP   204       9.523  39.757  31.457  1.00 16.80      1SG 
ATOM   3234  N   ALA   205      10.193  38.735  33.380  1.00 17.21      1SG 
ATOM   3235  HN  ALA   205      10.217  37.903  33.928  1.00   .00      1SG 
ATOM   3236  CA  ALA   205      10.830  39.914  34.004  1.00 15.96      1SG 
ATOM   3237  HA  ALA   205      10.875  40.698  33.263  1.00   .00      1SG 
ATOM   3238  CB  ALA   205      10.048  40.384  35.215  1.00 14.70      1SG 
ATOM   3239  HB1 ALA   205       9.996  39.574  35.974  1.00   .00      1SG 
ATOM   3240  HB2 ALA   205       9.013  40.656  34.915  1.00   .00      1SG 
ATOM   3241  HB3 ALA   205      10.549  41.265  35.670  1.00   .00      1SG 
ATOM   3242  C   ALA   205      12.202  39.425  34.435  1.00 17.30      1SG 
ATOM   3243  O   ALA   205      12.312  38.489  35.223  1.00 13.11      1SG 
ATOM   3244  N   LEU   206      13.247  40.065  33.932  1.00 14.85      1SG 
ATOM   3245  HN  LEU   206      13.155  40.862  33.340  1.00   .00      1SG 
ATOM   3246  CA  LEU   206      14.604  39.625  34.227  1.00 15.39      1SG 
ATOM   3247  HA  LEU   206      14.561  38.901  35.027  1.00   .00      1SG 
ATOM   3248  CB  LEU   206      15.216  39.007  32.974  1.00 18.07      1SG 
ATOM   3249  HB1 LEU   206      16.235  38.660  33.241  1.00   .00      1SG 
ATOM   3250  HB2 LEU   206      15.294  39.811  32.214  1.00   .00      1SG 
ATOM   3251  CG  LEU   206      14.493  37.830  32.318  1.00 19.06      1SG 
ATOM   3252  HG  LEU   206      13.413  38.069  32.218  1.00   .00      1SG 
ATOM   3253  CD1 LEU   206      15.094  37.549  30.911  1.00 22.03      1SG 
ATOM   3254 HD11 LEU   206      16.174  37.302  30.999  1.00   .00      1SG 
ATOM   3255 HD12 LEU   206      14.987  38.449  30.268  1.00   .00      1SG 
ATOM   3256 HD13 LEU   206      14.571  36.689  30.441  1.00   .00      1SG 
ATOM   3257  CD2 LEU   206      14.628  36.634  33.221  1.00 15.86      1SG 
ATOM   3258 HD21 LEU   206      14.174  36.850  34.212  1.00   .00      1SG 
ATOM   3259 HD22 LEU   206      15.702  36.391  33.369  1.00   .00      1SG 
ATOM   3260 HD23 LEU   206      14.105  35.762  32.774  1.00   .00      1SG 
ATOM   3261  C   LEU   206      15.509  40.756  34.674  1.00 16.64      1SG 
ATOM   3262  O   LEU   206      15.211  41.911  34.415  1.00 16.19      1SG 
ATOM   3263  N   SER   207      16.599  40.390  35.356  1.00 15.01      1SG 
ATOM   3264  HN  SER   207      16.771  39.437  35.593  1.00   .00      1SG 
ATOM   3265  CA  SER   207      17.614  41.344  35.804  1.00 18.06      1SG 
ATOM   3266  HA  SER   207      18.307  40.822  36.447  1.00   .00      1SG 
ATOM   3267  CB  SER   207      18.349  41.940  34.594  1.00 23.47      1SG 
ATOM   3268  HB1 SER   207      19.143  42.629  34.952  1.00   .00      1SG 
ATOM   3269  HB2 SER   207      17.625  42.504  33.968  1.00   .00      1SG 
ATOM   3270  OG  SER   207      18.952  40.949  33.790  1.00 35.39      1SG 
ATOM   3271  HG1 SER   207      19.683  40.600  34.305  1.00   .00      1SG 
ATOM   3272  C   SER   207      17.085  42.503  36.628  1.00 16.95      1SG 
ATOM   3273  O   SER   207      17.566  43.633  36.466  1.00 19.08      1SG 
ATOM   3274  N   PHE   208      16.121  42.266  37.508  1.00 15.33      1SG 
ATOM   3275  HN  PHE   208      15.725  41.363  37.658  1.00   .00      1SG 
ATOM   3276  CA  PHE   208      15.596  43.374  38.312  1.00 17.91      1SG 
ATOM   3277  HA  PHE   208      16.041  44.288  37.948  1.00   .00      1SG 
ATOM   3278  CB  PHE   208      14.049  43.454  38.212  1.00 18.75      1SG 
ATOM   3279  HB1 PHE   208      13.766  43.633  37.153  1.00   .00      1SG 
ATOM   3280  HB2 PHE   208      13.690  44.289  38.851  1.00   .00      1SG 
ATOM   3281  CG  PHE   208      13.311  42.211  38.659  1.00 19.82      1SG 
ATOM   3282  CD1 PHE   208      12.877  42.071  39.980  1.00 14.75      1SG 
ATOM   3283  HD1 PHE   208      13.085  42.852  40.696  1.00   .00      1SG 
ATOM   3284  CE1 PHE   208      12.158  40.901  40.396  1.00 13.32      1SG 
ATOM   3285  HE1 PHE   208      11.829  40.805  41.420  1.00   .00      1SG 
ATOM   3286  CZ  PHE   208      11.886  39.893  39.481  1.00 14.80      1SG 
ATOM   3287  HZ  PHE   208      11.347  39.011  39.794  1.00   .00      1SG 
ATOM   3288  CD2 PHE   208      13.025  41.182  37.743  1.00 16.12      1SG 
ATOM   3289  HD2 PHE   208      13.353  41.278  36.719  1.00   .00      1SG 
ATOM   3290  CE2 PHE   208      12.314  40.021  38.140  1.00 15.55      1SG 
ATOM   3291  HE2 PHE   208      12.101  39.241  37.424  1.00   .00      1SG 
ATOM   3292  C   PHE   208      16.042  43.347  39.773  1.00 18.32      1SG 
ATOM   3293  O   PHE   208      16.476  42.323  40.292  1.00 17.55      1SG 
ATOM   3294  N   TYR   209      15.943  44.498  40.413  1.00 16.39      1SG 
ATOM   3295  HN  TYR   209      15.588  45.318  39.971  1.00   .00      1SG 
ATOM   3296  CA  TYR   209      16.347  44.648  41.812  1.00 16.97      1SG 
ATOM   3297  HA  TYR   209      16.047  43.756  42.342  1.00   .00      1SG 
ATOM   3298  CB  TYR   209      17.848  44.849  41.930  1.00 17.71      1SG 
ATOM   3299  HB1 TYR   209      18.145  45.792  41.423  1.00   .00      1SG 
ATOM   3300  HB2 TYR   209      18.382  43.987  41.477  1.00   .00      1SG 
ATOM   3301  CG  TYR   209      18.269  44.948  43.385  1.00 18.02      1SG 
ATOM   3302  CD1 TYR   209      18.613  43.808  44.107  1.00 22.01      1SG 
ATOM   3303  HD1 TYR   209      18.670  42.857  43.598  1.00   .00      1SG 
ATOM   3304  CE1 TYR   209      18.888  43.870  45.488  1.00 20.47      1SG 
ATOM   3305  HE1 TYR   209      19.145  42.973  46.032  1.00   .00      1SG 
ATOM   3306  CZ  TYR   209      18.826  45.092  46.144  1.00 21.90      1SG 
ATOM   3307  OH  TYR   209      19.097  45.142  47.501  1.00 22.40      1SG 
ATOM   3308  HH  TYR   209      18.716  45.951  47.850  1.00   .00      1SG 
ATOM   3309  CD2 TYR   209      18.218  46.168  44.064  1.00 19.65      1SG 
ATOM   3310  HD2 TYR   209      17.961  47.066  43.522  1.00   .00      1SG 
ATOM   3311  CE2 TYR   209      18.496  46.249  45.447  1.00 20.60      1SG 
ATOM   3312  HE2 TYR   209      18.453  47.200  45.957  1.00   .00      1SG 
ATOM   3313  C   TYR   209      15.665  45.914  42.258  1.00 16.93      1SG 
ATOM   3314  O   TYR   209      15.711  46.912  41.547  1.00 17.36      1SG 
ATOM   3315  N   PRO   210      15.047  45.909  43.450  1.00 20.47      1SG 
ATOM   3316  CD  PRO   210      14.468  47.132  44.040  1.00 21.97      1SG 
ATOM   3317  HD1 PRO   210      13.798  47.632  43.310  1.00   .00      1SG 
ATOM   3318  HD2 PRO   210      15.274  47.827  44.354  1.00   .00      1SG 
ATOM   3319  CA  PRO   210      14.966  44.783  44.384  1.00 16.97      1SG 
ATOM   3320  HA  PRO   210      15.918  44.281  44.452  1.00   .00      1SG 
ATOM   3321  CB  PRO   210      14.490  45.449  45.696  1.00 21.40      1SG 
ATOM   3322  HB1 PRO   210      15.353  45.787  46.308  1.00   .00      1SG 
ATOM   3323  HB2 PRO   210      13.874  44.749  46.299  1.00   .00      1SG 
ATOM   3324  CG  PRO   210      13.695  46.585  45.234  1.00 24.27      1SG 
ATOM   3325  HG1 PRO   210      12.678  46.258  44.930  1.00   .00      1SG 
ATOM   3326  HG2 PRO   210      13.603  47.353  46.031  1.00   .00      1SG 
ATOM   3327  C   PRO   210      14.044  43.662  43.908  1.00 19.44      1SG 
ATOM   3328  O   PRO   210      13.424  43.743  42.835  1.00 19.19      1SG 
ATOM   3329  N   ALA   211      13.941  42.621  44.726  1.00 16.35      1SG 
ATOM   3330  HN  ALA   211      14.399  42.594  45.611  1.00   .00      1SG 
ATOM   3331  CA  ALA   211      13.147  41.449  44.376  1.00 14.95      1SG 
ATOM   3332  HA  ALA   211      13.415  41.140  43.377  1.00   .00      1SG 
ATOM   3333  CB  ALA   211      13.437  40.333  45.386  1.00 18.15      1SG 
ATOM   3334  HB1 ALA   211      13.171  40.667  46.411  1.00   .00      1SG 
ATOM   3335  HB2 ALA   211      14.518  40.076  45.366  1.00   .00      1SG 
ATOM   3336  HB3 ALA   211      12.834  39.433  45.139  1.00   .00      1SG 
ATOM   3337  C   ALA   211      11.641  41.668  44.256  1.00 16.23      1SG 
ATOM   3338  O   ALA   211      10.974  41.002  43.459  1.00 15.75      1SG 
ATOM   3339  N   GLU   212      11.092  42.585  45.058  1.00 21.37      1SG 
ATOM   3340  HN  GLU   212      11.627  43.131  45.699  1.00   .00      1SG 
ATOM   3341  CA  GLU   212       9.647  42.831  45.027  1.00 19.38      1SG 
ATOM   3342  HA  GLU   212       9.142  41.914  45.292  1.00   .00      1SG 
ATOM   3343  CB  GLU   212       9.285  43.956  46.023  1.00 24.69      1SG 
ATOM   3344  HB1 GLU   212       9.906  44.845  45.786  1.00   .00      1SG 
ATOM   3345  HB2 GLU   212       9.531  43.607  47.048  1.00   .00      1SG 
ATOM   3346  CG  GLU   212       7.821  44.375  45.999  1.00 35.14      1SG 
ATOM   3347  HG1 GLU   212       7.592  44.829  45.011  1.00   .00      1SG 
ATOM   3348  HG2 GLU   212       7.648  45.129  46.796  1.00   .00      1SG 
ATOM   3349  CD  GLU   212       6.864  43.197  46.228  1.00 46.09      1SG 
ATOM   3350  OE1 GLU   212       7.106  42.411  47.180  1.00 48.45      1SG 
ATOM   3351  OE2 GLU   212       5.871  43.058  45.467  1.00 49.26      1SG 
ATOM   3352  C   GLU   212       9.169  43.209  43.601  1.00 19.20      1SG 
ATOM   3353  O   GLU   212       9.728  44.093  42.954  1.00 19.93      1SG 
ATOM   3354  N   ILE   213       8.147  42.524  43.110  1.00 19.55      1SG 
ATOM   3355  HN  ILE   213       7.690  41.798  43.618  1.00   .00      1SG 
ATOM   3356  CA  ILE   213       7.640  42.812  41.777  1.00 20.21      1SG 
ATOM   3357  HA  ILE   213       7.561  43.884  41.672  1.00   .00      1SG 
ATOM   3358  CB  ILE   213       8.606  42.225  40.687  1.00 21.14      1SG 
ATOM   3359  HB  ILE   213       9.647  42.549  40.902  1.00   .00      1SG 
ATOM   3360  CG2 ILE   213       8.537  40.710  40.691  1.00 15.05      1SG 
ATOM   3361 HG21 ILE   213       7.555  40.371  40.297  1.00   .00      1SG 
ATOM   3362 HG22 ILE   213       8.653  40.329  41.728  1.00   .00      1SG 
ATOM   3363 HG23 ILE   213       9.341  40.293  40.047  1.00   .00      1SG 
ATOM   3364  CG1 ILE   213       8.257  42.767  39.293  1.00 22.54      1SG 
ATOM   3365 HG11 ILE   213       8.312  43.876  39.318  1.00   .00      1SG 
ATOM   3366 HG12 ILE   213       7.218  42.464  39.044  1.00   .00      1SG 
ATOM   3367  CD  ILE   213       9.198  42.252  38.191  1.00 20.60      1SG 
ATOM   3368  HD1 ILE   213       9.019  41.170  38.011  1.00   .00      1SG 
ATOM   3369  HD2 ILE   213      10.256  42.390  38.502  1.00   .00      1SG 
ATOM   3370  HD3 ILE   213       9.011  42.804  37.245  1.00   .00      1SG 
ATOM   3371  C   ILE   213       6.262  42.173  41.661  1.00 23.91      1SG 
ATOM   3372  O   ILE   213       5.943  41.207  42.369  1.00 22.02      1SG 
ATOM   3373  N   THR   214       5.428  42.722  40.785  1.00 24.40      1SG 
ATOM   3374  HN  THR   214       5.658  43.529  40.247  1.00   .00      1SG 
ATOM   3375  CA  THR   214       4.119  42.145  40.580  1.00 26.72      1SG 
ATOM   3376  HA  THR   214       4.107  41.181  41.067  1.00   .00      1SG 
ATOM   3377  CB  THR   214       2.996  43.028  41.143  1.00 31.34      1SG 
ATOM   3378  HB  THR   214       3.004  44.017  40.637  1.00   .00      1SG 
ATOM   3379  OG1 THR   214       3.193  43.223  42.550  1.00 29.64      1SG 
ATOM   3380  HG1 THR   214       4.138  43.346  42.670  1.00   .00      1SG 
ATOM   3381  CG2 THR   214       1.652  42.328  40.930  1.00 33.45      1SG 
ATOM   3382 HG21 THR   214       1.705  41.280  41.295  1.00   .00      1SG 
ATOM   3383 HG22 THR   214       1.400  42.315  39.848  1.00   .00      1SG 
ATOM   3384 HG23 THR   214        .855  42.859  41.493  1.00   .00      1SG 
ATOM   3385  C   THR   214       3.877  41.956  39.091  1.00 26.02      1SG 
ATOM   3386  O   THR   214       3.993  42.896  38.309  1.00 22.53      1SG 
ATOM   3387  N   LEU   215       3.578  40.723  38.712  1.00 23.77      1SG 
ATOM   3388  HN  LEU   215       3.540  39.966  39.360  1.00   .00      1SG 
ATOM   3389  CA  LEU   215       3.285  40.390  37.327  1.00 24.48      1SG 
ATOM   3390  HA  LEU   215       3.472  41.269  36.728  1.00   .00      1SG 
ATOM   3391  CB  LEU   215       4.150  39.227  36.839  1.00 26.22      1SG 
ATOM   3392  HB1 LEU   215       3.775  38.937  35.836  1.00   .00      1SG 
ATOM   3393  HB2 LEU   215       3.993  38.384  37.543  1.00   .00      1SG 
ATOM   3394  CG  LEU   215       5.644  39.435  36.715  1.00 27.36      1SG 
ATOM   3395  HG  LEU   215       6.067  39.704  37.706  1.00   .00      1SG 
ATOM   3396  CD1 LEU   215       6.307  38.122  36.201  1.00 22.51      1SG 
ATOM   3397 HD11 LEU   215       5.892  37.848  35.207  1.00   .00      1SG 
ATOM   3398 HD12 LEU   215       6.103  37.292  36.911  1.00   .00      1SG 
ATOM   3399 HD13 LEU   215       7.404  38.267  36.100  1.00   .00      1SG 
ATOM   3400  CD2 LEU   215       5.879  40.602  35.773  1.00 24.65      1SG 
ATOM   3401 HD21 LEU   215       5.402  41.521  36.177  1.00   .00      1SG 
ATOM   3402 HD22 LEU   215       5.437  40.380  34.778  1.00   .00      1SG 
ATOM   3403 HD23 LEU   215       6.969  40.787  35.665  1.00   .00      1SG 
ATOM   3404  C   LEU   215       1.848  39.914  37.313  1.00 26.61      1SG 
ATOM   3405  O   LEU   215       1.517  38.949  38.002  1.00 26.06      1SG 
ATOM   3406  N   THR   216        .998  40.570  36.531  1.00 29.12      1SG 
ATOM   3407  HN  THR   216       1.258  41.361  35.983  1.00   .00      1SG 
ATOM   3408  CA  THR   216       -.389  40.130  36.454  1.00 30.33      1SG 
ATOM   3409  HA  THR   216       -.448  39.134  36.868  1.00   .00      1SG 
ATOM   3410  CB  THR   216      -1.305  41.088  37.235  1.00 30.82      1SG 
ATOM   3411  HB  THR   216      -2.354  40.726  37.191  1.00   .00      1SG 
ATOM   3412  OG1 THR   216      -1.241  42.395  36.661  1.00 38.38      1SG 
ATOM   3413  HG1 THR   216      -1.941  42.902  37.079  1.00   .00      1SG 
ATOM   3414  CG2 THR   216       -.851  41.169  38.698  1.00 30.08      1SG 
ATOM   3415 HG21 THR   216        .193  41.544  38.753  1.00   .00      1SG 
ATOM   3416 HG22 THR   216       -.891  40.161  39.163  1.00   .00      1SG 
ATOM   3417 HG23 THR   216      -1.508  41.866  39.260  1.00   .00      1SG 
ATOM   3418  C   THR   216       -.865  40.002  35.003  1.00 29.76      1SG 
ATOM   3419  O   THR   216       -.392  40.714  34.108  1.00 31.05      1SG 
ATOM   3420  N   TRP   217      -1.759  39.049  34.777  1.00 27.41      1SG 
ATOM   3421  HN  TRP   217      -2.080  38.447  35.504  1.00   .00      1SG 
ATOM   3422  CA  TRP   217      -2.336  38.813  33.455  1.00 28.79      1SG 
ATOM   3423  HA  TRP   217      -1.759  39.380  32.740  1.00   .00      1SG 
ATOM   3424  CB  TRP   217      -2.323  37.334  33.080  1.00 28.68      1SG 
ATOM   3425  HB1 TRP   217      -3.151  37.145  32.365  1.00   .00      1SG 
ATOM   3426  HB2 TRP   217      -2.492  36.736  34.001  1.00   .00      1SG 
ATOM   3427  CG  TRP   217      -1.067  36.868  32.457  1.00 27.49      1SG 
ATOM   3428  CD1 TRP   217       -.091  36.102  33.039  1.00 29.43      1SG 
ATOM   3429  HD1 TRP   217       -.107  35.747  34.059  1.00   .00      1SG 
ATOM   3430  NE1 TRP   217        .912  35.852  32.133  1.00 27.85      1SG 
ATOM   3431  HE1 TRP   217       1.715  35.326  32.308  1.00   .00      1SG 
ATOM   3432  CE2 TRP   217        .602  36.461  30.943  1.00 28.17      1SG 
ATOM   3433  CD2 TRP   217       -.644  37.113  31.115  1.00 27.72      1SG 
ATOM   3434  CE3 TRP   217      -1.193  37.818  30.036  1.00 26.13      1SG 
ATOM   3435  HE3 TRP   217      -2.138  38.334  30.118  1.00   .00      1SG 
ATOM   3436  CZ3 TRP   217       -.486  37.847  28.819  1.00 27.33      1SG 
ATOM   3437  HZ3 TRP   217       -.895  38.385  27.977  1.00   .00      1SG 
ATOM   3438  CZ2 TRP   217       1.301  36.492  29.735  1.00 25.84      1SG 
ATOM   3439  HZ2 TRP   217       2.250  35.992  29.610  1.00   .00      1SG 
ATOM   3440  CH2 TRP   217        .747  37.184  28.687  1.00 25.88      1SG 
ATOM   3441  HH2 TRP   217       1.269  37.220  27.742  1.00   .00      1SG 
ATOM   3442  C   TRP   217      -3.779  39.257  33.492  1.00 32.94      1SG 
ATOM   3443  O   TRP   217      -4.519  38.925  34.428  1.00 34.38      1SG 
ATOM   3444  N   GLN   218      -4.161  40.008  32.471  1.00 34.12      1SG 
ATOM   3445  HN  GLN   218      -3.525  40.276  31.752  1.00   .00      1SG 
ATOM   3446  CA  GLN   218      -5.520  40.494  32.322  1.00 37.84      1SG 
ATOM   3447  HA  GLN   218      -6.115  40.087  33.126  1.00   .00      1SG 
ATOM   3448  CB  GLN   218      -5.530  42.018  32.368  1.00 35.02      1SG 
ATOM   3449  HB1 GLN   218      -6.441  42.379  31.846  1.00   .00      1SG 
ATOM   3450  HB2 GLN   218      -4.634  42.392  31.829  1.00   .00      1SG 
ATOM   3451  CG  GLN   218      -5.521  42.592  33.766  1.00 42.32      1SG 
ATOM   3452  HG1 GLN   218      -4.629  42.213  34.308  1.00   .00      1SG 
ATOM   3453  HG2 GLN   218      -6.438  42.263  34.299  1.00   .00      1SG 
ATOM   3454  CD  GLN   218      -5.479  44.113  33.767  1.00 43.99      1SG 
ATOM   3455  OE1 GLN   218      -6.132  44.761  32.951  1.00 48.49      1SG 
ATOM   3456  NE2 GLN   218      -4.720  44.689  34.693  1.00 43.98      1SG 
ATOM   3457 HE21 GLN   218      -4.536  45.671  34.649  1.00   .00      1SG 
ATOM   3458 HE22 GLN   218      -4.333  44.141  35.434  1.00   .00      1SG 
ATOM   3459  C   GLN   218      -6.078  40.025  30.977  1.00 38.19      1SG 
ATOM   3460  O   GLN   218      -5.342  39.944  29.983  1.00 34.41      1SG 
ATOM   3461  N   ARG   219      -7.367  39.680  30.955  1.00 37.70      1SG 
ATOM   3462  HN  ARG   219      -7.932  39.674  31.777  1.00   .00      1SG 
ATOM   3463  CA  ARG   219      -8.028  39.288  29.710  1.00 39.10      1SG 
ATOM   3464  HA  ARG   219      -7.281  39.282  28.930  1.00   .00      1SG 
ATOM   3465  CB  ARG   219      -8.680  37.918  29.814  1.00 41.31      1SG 
ATOM   3466  HB1 ARG   219      -9.554  37.988  30.496  1.00   .00      1SG 
ATOM   3467  HB2 ARG   219      -7.946  37.204  30.243  1.00   .00      1SG 
ATOM   3468  CG  ARG   219      -9.148  37.391  28.471  1.00 44.14      1SG 
ATOM   3469  HG1 ARG   219      -8.466  36.579  28.141  1.00   .00      1SG 
ATOM   3470  HG2 ARG   219      -9.115  38.213  27.725  1.00   .00      1SG 
ATOM   3471  CD  ARG   219     -10.552  36.855  28.553  1.00 50.38      1SG 
ATOM   3472  HD1 ARG   219     -10.824  36.367  27.593  1.00   .00      1SG 
ATOM   3473  HD2 ARG   219     -11.258  37.684  28.773  1.00   .00      1SG 
ATOM   3474  NE  ARG   219     -10.690  35.861  29.612  1.00 55.75      1SG 
ATOM   3475  HE  ARG   219      -9.872  35.607  30.127  1.00   .00      1SG 
ATOM   3476  CZ  ARG   219     -11.839  35.272  29.934  1.00 60.11      1SG 
ATOM   3477  NH1 ARG   219     -12.947  35.584  29.269  1.00 59.43      1SG 
ATOM   3478 HH11 ARG   219     -13.778  35.043  29.400  1.00   .00      1SG 
ATOM   3479 HH12 ARG   219     -12.950  36.359  28.637  1.00   .00      1SG 
ATOM   3480  NH2 ARG   219     -11.886  34.383  30.928  1.00 62.45      1SG 
ATOM   3481 HH21 ARG   219     -12.769  34.056  31.265  1.00   .00      1SG 
ATOM   3482 HH22 ARG   219     -11.038  34.044  31.336  1.00   .00      1SG 
ATOM   3483  C   ARG   219      -9.101  40.351  29.543  1.00 43.92      1SG 
ATOM   3484  O   ARG   219     -10.015  40.443  30.365  1.00 46.40      1SG 
ATOM   3485  N   ASP   220      -8.971  41.156  28.495  1.00 44.39      1SG 
ATOM   3486  HN  ASP   220      -8.230  41.044  27.837  1.00   .00      1SG 
ATOM   3487  CA  ASP   220      -9.889  42.249  28.230  1.00 48.81      1SG 
ATOM   3488  HA  ASP   220      -9.463  42.861  27.449  1.00   .00      1SG 
ATOM   3489  CB  ASP   220     -11.253  41.719  27.802  1.00 49.20      1SG 
ATOM   3490  HB1 ASP   220     -11.952  42.573  27.677  1.00   .00      1SG 
ATOM   3491  HB2 ASP   220     -11.643  41.040  28.590  1.00   .00      1SG 
ATOM   3492  CG  ASP   220     -11.181  40.956  26.497  1.00 50.27      1SG 
ATOM   3493  OD1 ASP   220     -10.735  41.545  25.481  1.00 48.46      1SG 
ATOM   3494  OD2 ASP   220     -11.556  39.766  26.497  1.00 52.48      1SG 
ATOM   3495  C   ASP   220     -10.018  43.120  29.466  1.00 50.97      1SG 
ATOM   3496  O   ASP   220     -11.124  43.402  29.933  1.00 51.91      1SG 
ATOM   3497  N   GLY   221      -8.866  43.522  29.999  1.00 51.51      1SG 
ATOM   3498  HN  GLY   221      -7.986  43.245  29.623  1.00   .00      1SG 
ATOM   3499  CA  GLY   221      -8.814  44.389  31.161  1.00 51.81      1SG 
ATOM   3500  HA1 GLY   221      -9.490  45.206  30.959  1.00   .00      1SG 
ATOM   3501  HA2 GLY   221      -7.799  44.750  31.224  1.00   .00      1SG 
ATOM   3502  C   GLY   221      -9.179  43.820  32.517  1.00 53.37      1SG 
ATOM   3503  O   GLY   221      -9.236  44.571  33.488  1.00 53.50      1SG 
ATOM   3504  N   GLU   222      -9.404  42.514  32.607  1.00 56.44      1SG 
ATOM   3505  HN  GLU   222      -9.326  41.902  31.824  1.00   .00      1SG 
ATOM   3506  CA  GLU   222      -9.782  41.901  33.876  1.00 58.91      1SG 
ATOM   3507  HA  GLU   222      -9.770  42.665  34.639  1.00   .00      1SG 
ATOM   3508  CB  GLU   222     -11.173  41.288  33.753  1.00 64.74      1SG 
ATOM   3509  HB1 GLU   222     -11.490  40.925  34.753  1.00   .00      1SG 
ATOM   3510  HB2 GLU   222     -11.119  40.424  33.057  1.00   .00      1SG 
ATOM   3511  CG  GLU   222     -12.217  42.260  33.238  1.00 73.91      1SG 
ATOM   3512  HG1 GLU   222     -11.932  42.588  32.216  1.00   .00      1SG 
ATOM   3513  HG2 GLU   222     -12.250  43.144  33.909  1.00   .00      1SG 
ATOM   3514  CD  GLU   222     -13.603  41.647  33.179  1.00 80.09      1SG 
ATOM   3515  OE1 GLU   222     -13.763  40.607  32.502  1.00 83.66      1SG 
ATOM   3516  OE2 GLU   222     -14.530  42.208  33.809  1.00 82.97      1SG 
ATOM   3517  C   GLU   222      -8.800  40.835  34.341  1.00 58.50      1SG 
ATOM   3518  O   GLU   222      -8.476  39.911  33.600  1.00 55.67      1SG 
ATOM   3519  N   ASP   223      -8.354  40.961  35.585  1.00 58.55      1SG 
ATOM   3520  HN  ASP   223      -8.658  41.701  36.180  1.00   .00      1SG 
ATOM   3521  CA  ASP   223      -7.393  40.032  36.168  1.00 61.25      1SG 
ATOM   3522  HA  ASP   223      -6.441  40.177  35.679  1.00   .00      1SG 
ATOM   3523  CB  ASP   223      -7.273  40.297  37.667  1.00 65.14      1SG 
ATOM   3524  HB1 ASP   223      -6.665  39.491  38.130  1.00   .00      1SG 
ATOM   3525  HB2 ASP   223      -8.288  40.293  38.119  1.00   .00      1SG 
ATOM   3526  CG  ASP   223      -6.614  41.635  37.965  1.00 68.74      1SG 
ATOM   3527  OD1 ASP   223      -7.063  42.667  37.409  1.00 70.23      1SG 
ATOM   3528  OD2 ASP   223      -5.646  41.653  38.757  1.00 71.14      1SG 
ATOM   3529  C   ASP   223      -7.700  38.559  35.905  1.00 60.46      1SG 
ATOM   3530  O   ASP   223      -8.861  38.152  35.855  1.00 60.11      1SG 
ATOM   3531  N   GLN   224      -6.635  37.775  35.751  1.00 58.33      1SG 
ATOM   3532  HN  GLN   224      -5.709  38.134  35.839  1.00   .00      1SG 
ATOM   3533  CA  GLN   224      -6.727  36.352  35.447  1.00 58.36      1SG 
ATOM   3534  HA  GLN   224      -7.771  36.079  35.402  1.00   .00      1SG 
ATOM   3535  CB  GLN   224      -6.041  36.082  34.110  1.00 57.31      1SG 
ATOM   3536  HB1 GLN   224      -5.910  34.985  33.998  1.00   .00      1SG 
ATOM   3537  HB2 GLN   224      -5.041  36.564  34.125  1.00   .00      1SG 
ATOM   3538  CG  GLN   224      -6.794  36.592  32.922  1.00 52.75      1SG 
ATOM   3539  HG1 GLN   224      -6.166  36.480  32.012  1.00   .00      1SG 
ATOM   3540  HG2 GLN   224      -7.032  37.667  33.071  1.00   .00      1SG 
ATOM   3541  CD  GLN   224      -8.073  35.834  32.726  1.00 53.93      1SG 
ATOM   3542  OE1 GLN   224      -8.062  34.634  32.440  1.00 51.27      1SG 
ATOM   3543  NE2 GLN   224      -9.194  36.523  32.891  1.00 56.34      1SG 
ATOM   3544 HE21 GLN   224      -9.154  37.493  33.133  1.00   .00      1SG 
ATOM   3545 HE22 GLN   224     -10.079  36.073  32.774  1.00   .00      1SG 
ATOM   3546  C   GLN   224      -6.136  35.396  36.476  1.00 60.01      1SG 
ATOM   3547  O   GLN   224      -5.158  35.712  37.145  1.00 61.87      1SG 
ATOM   3548  N   THR   225      -6.727  34.208  36.564  1.00 61.69      1SG 
ATOM   3549  HN  THR   225      -7.522  33.977  36.008  1.00   .00      1SG 
ATOM   3550  CA  THR   225      -6.265  33.161  37.469  1.00 61.63      1SG 
ATOM   3551  HA  THR   225      -5.201  33.287  37.603  1.00   .00      1SG 
ATOM   3552  CB  THR   225      -6.979  33.230  38.828  1.00 60.86      1SG 
ATOM   3553  HB  THR   225      -8.078  33.149  38.684  1.00   .00      1SG 
ATOM   3554  OG1 THR   225      -6.679  34.483  39.455  1.00 58.92      1SG 
ATOM   3555  HG1 THR   225      -6.540  35.110  38.741  1.00   .00      1SG 
ATOM   3556  CG2 THR   225      -6.526  32.076  39.731  1.00 59.01      1SG 
ATOM   3557 HG21 THR   225      -5.417  32.024  39.757  1.00   .00      1SG 
ATOM   3558 HG22 THR   225      -6.917  31.113  39.338  1.00   .00      1SG 
ATOM   3559 HG23 THR   225      -6.898  32.237  40.765  1.00   .00      1SG 
ATOM   3560  C   THR   225      -6.495  31.774  36.864  1.00 61.45      1SG 
ATOM   3561  O   THR   225      -6.717  31.635  35.656  1.00 62.87      1SG 
ATOM   3562  N   THR   228      -3.721  30.765  35.014  1.00 41.71      1SG 
ATOM   3563  HN  THR   228      -3.701  30.024  34.349  1.00   .00      1SG 
ATOM   3564  CA  THR   228      -2.504  31.538  35.283  1.00 44.96      1SG 
ATOM   3565  HA  THR   228      -2.024  31.743  34.338  1.00   .00      1SG 
ATOM   3566  CB  THR   228      -2.837  32.857  36.009  1.00 45.94      1SG 
ATOM   3567  HB  THR   228      -3.687  33.361  35.502  1.00   .00      1SG 
ATOM   3568  OG1 THR   228      -1.702  33.730  35.988  1.00 49.96      1SG 
ATOM   3569  HG1 THR   228      -1.913  34.453  36.583  1.00   .00      1SG 
ATOM   3570  CG2 THR   228      -3.200  32.584  37.449  1.00 50.12      1SG 
ATOM   3571 HG21 THR   228      -2.350  32.094  37.971  1.00   .00      1SG 
ATOM   3572 HG22 THR   228      -4.081  31.909  37.495  1.00   .00      1SG 
ATOM   3573 HG23 THR   228      -3.432  33.539  37.968  1.00   .00      1SG 
ATOM   3574  C   THR   228      -1.516  30.747  36.151  1.00 44.13      1SG 
ATOM   3575  O   THR   228      -1.917  30.002  37.053  1.00 46.18      1SG 
ATOM   3576  N   GLU   229       -.226  30.899  35.873  1.00 37.68      1SG 
ATOM   3577  HN  GLU   229        .094  31.487  35.135  1.00   .00      1SG 
ATOM   3578  CA  GLU   229        .798  30.210  36.637  1.00 32.26      1SG 
ATOM   3579  HA  GLU   229        .347  29.854  37.551  1.00   .00      1SG 
ATOM   3580  CB  GLU   229       1.383  29.041  35.849  1.00 35.87      1SG 
ATOM   3581  HB1 GLU   229       2.031  29.439  35.040  1.00   .00      1SG 
ATOM   3582  HB2 GLU   229        .553  28.462  35.392  1.00   .00      1SG 
ATOM   3583  CG  GLU   229       2.204  28.117  36.729  1.00 43.12      1SG 
ATOM   3584  HG1 GLU   229       1.512  27.511  37.351  1.00   .00      1SG 
ATOM   3585  HG2 GLU   229       2.845  28.735  37.393  1.00   .00      1SG 
ATOM   3586  CD  GLU   229       3.097  27.171  35.958  1.00 45.50      1SG 
ATOM   3587  OE1 GLU   229       2.745  26.799  34.822  1.00 46.28      1SG 
ATOM   3588  OE2 GLU   229       4.156  26.786  36.505  1.00 52.57      1SG 
ATOM   3589  C   GLU   229       1.899  31.217  36.928  1.00 33.00      1SG 
ATOM   3590  O   GLU   229       2.322  31.957  36.036  1.00 30.21      1SG 
ATOM   3591  N   LEU   230       2.373  31.233  38.168  1.00 29.38      1SG 
ATOM   3592  HN  LEU   230       2.043  30.608  38.871  1.00   .00      1SG 
ATOM   3593  CA  LEU   230       3.419  32.180  38.580  1.00 28.86      1SG 
ATOM   3594  HA  LEU   230       3.771  32.701  37.702  1.00   .00      1SG 
ATOM   3595  CB  LEU   230       2.841  33.165  39.595  1.00 34.29      1SG 
ATOM   3596  HB1 LEU   230       3.494  33.103  40.487  1.00   .00      1SG 
ATOM   3597  HB2 LEU   230       1.833  32.784  39.851  1.00   .00      1SG 
ATOM   3598  CG  LEU   230       2.667  34.655  39.302  1.00 40.17      1SG 
ATOM   3599  HG  LEU   230       1.886  34.797  38.525  1.00   .00      1SG 
ATOM   3600  CD1 LEU   230       2.251  35.363  40.592  1.00 43.03      1SG 
ATOM   3601 HD11 LEU   230       3.031  35.226  41.371  1.00   .00      1SG 
ATOM   3602 HD12 LEU   230       1.296  34.936  40.967  1.00   .00      1SG 
ATOM   3603 HD13 LEU   230       2.126  36.451  40.403  1.00   .00      1SG 
ATOM   3604  CD2 LEU   230       3.974  35.253  38.786  1.00 40.98      1SG 
ATOM   3605 HD21 LEU   230       4.018  35.177  37.678  1.00   .00      1SG 
ATOM   3606 HD22 LEU   230       4.838  34.700  39.214  1.00   .00      1SG 
ATOM   3607 HD23 LEU   230       4.038  36.325  39.071  1.00   .00      1SG 
ATOM   3608  C   LEU   230       4.537  31.410  39.269  1.00 31.41      1SG 
ATOM   3609  O   LEU   230       4.249  30.501  40.053  1.00 31.78      1SG 
ATOM   3610  N   VAL   231       5.803  31.726  38.988  1.00 21.50      1SG 
ATOM   3611  HN  VAL   231       6.076  32.405  38.311  1.00   .00      1SG 
ATOM   3612  CA  VAL   231       6.844  31.028  39.724  1.00 19.60      1SG 
ATOM   3613  HA  VAL   231       6.394  30.143  40.149  1.00   .00      1SG 
ATOM   3614  CB  VAL   231       8.081  30.617  38.856  1.00 20.67      1SG 
ATOM   3615  HB  VAL   231       8.925  30.340  39.523  1.00   .00      1SG 
ATOM   3616  CG1 VAL   231       7.733  29.445  37.974  1.00 25.82      1SG 
ATOM   3617 HG11 VAL   231       6.894  29.713  37.297  1.00   .00      1SG 
ATOM   3618 HG12 VAL   231       7.422  28.581  38.599  1.00   .00      1SG 
ATOM   3619 HG13 VAL   231       8.612  29.163  37.356  1.00   .00      1SG 
ATOM   3620  CG2 VAL   231       8.592  31.843  38.012  1.00 16.42      1SG 
ATOM   3621 HG21 VAL   231       8.891  32.673  38.687  1.00   .00      1SG 
ATOM   3622 HG22 VAL   231       7.783  32.205  37.342  1.00   .00      1SG 
ATOM   3623 HG23 VAL   231       9.473  31.544  37.406  1.00   .00      1SG 
ATOM   3624  C   VAL   231       7.324  31.969  40.788  1.00 16.54      1SG 
ATOM   3625  O   VAL   231       7.143  33.184  40.687  1.00 18.87      1SG 
ATOM   3626  N   GLU   232       7.940  31.409  41.817  1.00 18.58      1SG 
ATOM   3627  HN  GLU   232       8.040  30.421  41.908  1.00   .00      1SG 
ATOM   3628  CA  GLU   232       8.504  32.212  42.871  1.00 19.90      1SG 
ATOM   3629  HA  GLU   232       7.713  32.812  43.295  1.00   .00      1SG 
ATOM   3630  CB  GLU   232       9.127  31.328  43.940  1.00 23.48      1SG 
ATOM   3631  HB1 GLU   232       9.844  30.627  43.462  1.00   .00      1SG 
ATOM   3632  HB2 GLU   232       8.328  30.740  44.439  1.00   .00      1SG 
ATOM   3633  CG  GLU   232       9.861  32.161  44.983  1.00 33.70      1SG 
ATOM   3634  HG1 GLU   232       9.146  32.885  45.428  1.00   .00      1SG 
ATOM   3635  HG2 GLU   232      10.681  32.718  44.482  1.00   .00      1SG 
ATOM   3636  CD  GLU   232      10.467  31.332  46.113  1.00 43.58      1SG 
ATOM   3637  OE1 GLU   232       9.958  30.204  46.341  1.00 46.49      1SG 
ATOM   3638  OE2 GLU   232      11.431  31.823  46.773  1.00 38.26      1SG 
ATOM   3639  C   GLU   232       9.631  33.051  42.253  1.00 19.83      1SG 
ATOM   3640  O   GLU   232      10.364  32.548  41.405  1.00 18.75      1SG 
ATOM   3641  N   THR   233       9.769  34.301  42.693  1.00 16.17      1SG 
ATOM   3642  HN  THR   233       9.153  34.698  43.369  1.00   .00      1SG 
ATOM   3643  CA  THR   233      10.845  35.173  42.203  1.00 15.13      1SG 
ATOM   3644  HA  THR   233      10.738  35.275  41.133  1.00   .00      1SG 
ATOM   3645  CB  THR   233      10.753  36.541  42.885  1.00 15.93      1SG 
ATOM   3646  HB  THR   233      10.813  36.426  43.988  1.00   .00      1SG 
ATOM   3647  OG1 THR   233       9.494  37.125  42.536  1.00 17.62      1SG 
ATOM   3648  HG1 THR   233       9.531  38.035  42.841  1.00   .00      1SG 
ATOM   3649  CG2 THR   233      11.928  37.467  42.475  1.00 17.48      1SG 
ATOM   3650 HG21 THR   233      12.031  37.486  41.369  1.00   .00      1SG 
ATOM   3651 HG22 THR   233      12.877  37.090  42.913  1.00   .00      1SG 
ATOM   3652 HG23 THR   233      11.736  38.502  42.831  1.00   .00      1SG 
ATOM   3653  C   THR   233      12.132  34.440  42.585  1.00 15.80      1SG 
ATOM   3654  O   THR   233      12.255  33.922  43.709  1.00 16.24      1SG 
ATOM   3655  N   ARG   234      13.082  34.377  41.659  1.00 12.06      1SG 
ATOM   3656  HN  ARG   234      12.997  34.832  40.776  1.00   .00      1SG 
ATOM   3657  CA  ARG   234      14.318  33.629  41.886  1.00 13.85      1SG 
ATOM   3658  HA  ARG   234      14.355  33.326  42.922  1.00   .00      1SG 
ATOM   3659  CB  ARG   234      14.308  32.407  40.956  1.00 14.69      1SG 
ATOM   3660  HB1 ARG   234      13.378  31.826  41.133  1.00   .00      1SG 
ATOM   3661  HB2 ARG   234      15.183  31.765  41.194  1.00   .00      1SG 
ATOM   3662  CG  ARG   234      14.371  32.805  39.488  1.00 16.12      1SG 
ATOM   3663  HG1 ARG   234      15.422  33.055  39.228  1.00   .00      1SG 
ATOM   3664  HG2 ARG   234      13.738  33.705  39.332  1.00   .00      1SG 
ATOM   3665  CD  ARG   234      13.876  31.673  38.545  1.00 15.30      1SG 
ATOM   3666  HD1 ARG   234      12.769  31.594  38.591  1.00   .00      1SG 
ATOM   3667  HD2 ARG   234      14.340  30.706  38.833  1.00   .00      1SG 
ATOM   3668  NE  ARG   234      14.258  31.969  37.150  1.00 14.85      1SG 
ATOM   3669  HE  ARG   234      14.839  32.764  36.980  1.00   .00      1SG 
ATOM   3670  CZ  ARG   234      13.876  31.242  36.108  1.00 14.12      1SG 
ATOM   3671  NH1 ARG   234      13.071  30.193  36.313  1.00 14.35      1SG 
ATOM   3672 HH11 ARG   234      12.648  30.055  37.208  1.00   .00      1SG 
ATOM   3673 HH12 ARG   234      12.893  29.547  35.571  1.00   .00      1SG 
ATOM   3674  NH2 ARG   234      14.359  31.506  34.877  1.00 13.76      1SG 
ATOM   3675 HH21 ARG   234      15.010  32.254  34.745  1.00   .00      1SG 
ATOM   3676 HH22 ARG   234      14.067  30.954  34.096  1.00   .00      1SG 
ATOM   3677  C   ARG   234      15.584  34.479  41.633  1.00 13.90      1SG 
ATOM   3678  O   ARG   234      15.595  35.369  40.765  1.00 13.04      1SG 
ATOM   3679  N   PRO   235      16.680  34.178  42.342  1.00 13.26      1SG 
ATOM   3680  CD  PRO   235      16.815  33.165  43.408  1.00 15.70      1SG 
ATOM   3681  HD1 PRO   235      16.471  32.176  43.039  1.00   .00      1SG 
ATOM   3682  HD2 PRO   235      16.221  33.466  44.296  1.00   .00      1SG 
ATOM   3683  CA  PRO   235      17.923  34.951  42.158  1.00 13.76      1SG 
ATOM   3684  HA  PRO   235      17.699  35.996  42.016  1.00   .00      1SG 
ATOM   3685  CB  PRO   235      18.723  34.634  43.425  1.00 14.78      1SG 
ATOM   3686  HB1 PRO   235      18.440  35.305  44.263  1.00   .00      1SG 
ATOM   3687  HB2 PRO   235      19.816  34.720  43.248  1.00   .00      1SG 
ATOM   3688  CG  PRO   235      18.306  33.160  43.709  1.00 14.96      1SG 
ATOM   3689  HG1 PRO   235      18.848  32.453  43.046  1.00   .00      1SG 
ATOM   3690  HG2 PRO   235      18.502  32.883  44.766  1.00   .00      1SG 
ATOM   3691  C   PRO   235      18.686  34.534  40.895  1.00 15.71      1SG 
ATOM   3692  O   PRO   235      18.802  33.341  40.594  1.00 15.62      1SG 
ATOM   3693  N   ALA   236      19.218  35.514  40.177  1.00 14.33      1SG 
ATOM   3694  HN  ALA   236      19.118  36.474  40.426  1.00   .00      1SG 
ATOM   3695  CA  ALA   236      19.997  35.231  38.955  1.00 17.64      1SG 
ATOM   3696  HA  ALA   236      19.521  34.415  38.432  1.00   .00      1SG 
ATOM   3697  CB  ALA   236      20.046  36.470  38.076  1.00 16.03      1SG 
ATOM   3698  HB1 ALA   236      20.526  37.308  38.624  1.00   .00      1SG 
ATOM   3699  HB2 ALA   236      19.015  36.775  37.794  1.00   .00      1SG 
ATOM   3700  HB3 ALA   236      20.638  36.260  37.160  1.00   .00      1SG 
ATOM   3701  C   ALA   236      21.421  34.812  39.344  1.00 19.89      1SG 
ATOM   3702  O   ALA   236      22.105  34.096  38.616  1.00 18.68      1SG 
ATOM   3703  N   GLY   237      21.850  35.266  40.514  1.00 20.33      1SG 
ATOM   3704  HN  GLY   237      21.293  35.850  41.100  1.00   .00      1SG 
ATOM   3705  CA  GLY   237      23.179  34.927  41.007  1.00 22.45      1SG 
ATOM   3706  HA1 GLY   237      23.553  34.099  40.423  1.00   .00      1SG 
ATOM   3707  HA2 GLY   237      23.090  34.640  42.044  1.00   .00      1SG 
ATOM   3708  C   GLY   237      24.139  36.098  40.891  1.00 25.60      1SG 
ATOM   3709  O   GLY   237      25.273  36.040  41.394  1.00 23.97      1SG 
ATOM   3710  N   ASP   238      23.683  37.163  40.236  1.00 21.70      1SG 
ATOM   3711  HN  ASP   238      22.762  37.197  39.856  1.00   .00      1SG 
ATOM   3712  CA  ASP   238      24.515  38.365  40.031  1.00 24.02      1SG 
ATOM   3713  HA  ASP   238      25.498  38.163  40.429  1.00   .00      1SG 
ATOM   3714  CB  ASP   238      24.605  38.713  38.543  1.00 21.75      1SG 
ATOM   3715  HB1 ASP   238      25.049  37.854  37.996  1.00   .00      1SG 
ATOM   3716  HB2 ASP   238      25.259  39.602  38.418  1.00   .00      1SG 
ATOM   3717  CG  ASP   238      23.243  39.023  37.936  1.00 24.83      1SG 
ATOM   3718  OD1 ASP   238      22.227  38.954  38.678  1.00 22.63      1SG 
ATOM   3719  OD2 ASP   238      23.188  39.328  36.721  1.00 23.94      1SG 
ATOM   3720  C   ASP   238      23.962  39.568  40.775  1.00 26.01      1SG 
ATOM   3721  O   ASP   238      24.322  40.723  40.478  1.00 25.16      1SG 
ATOM   3722  N   GLY   239      23.069  39.311  41.725  1.00 21.36      1SG 
ATOM   3723  HN  GLY   239      22.762  38.390  41.954  1.00   .00      1SG 
ATOM   3724  CA  GLY   239      22.496  40.414  42.483  1.00 21.55      1SG 
ATOM   3725  HA1 GLY   239      23.179  41.248  42.415  1.00   .00      1SG 
ATOM   3726  HA2 GLY   239      22.402  40.092  43.510  1.00   .00      1SG 
ATOM   3727  C   GLY   239      21.133  40.855  41.981  1.00 23.58      1SG 
ATOM   3728  O   GLY   239      20.509  41.743  42.572  1.00 24.86      1SG 
ATOM   3729  N   THR   240      20.660  40.257  40.894  1.00 17.94      1SG 
ATOM   3730  HN  THR   240      21.163  39.561  40.387  1.00   .00      1SG 
ATOM   3731  CA  THR   240      19.335  40.625  40.401  1.00 17.06      1SG 
ATOM   3732  HA  THR   240      18.955  41.398  41.052  1.00   .00      1SG 
ATOM   3733  CB  THR   240      19.333  41.133  38.938  1.00 19.10      1SG 
ATOM   3734  HB  THR   240      18.315  41.484  38.665  1.00   .00      1SG 
ATOM   3735  OG1 THR   240      19.713  40.080  38.045  1.00 17.54      1SG 
ATOM   3736  HG1 THR   240      20.646  39.922  38.205  1.00   .00      1SG 
ATOM   3737  CG2 THR   240      20.291  42.325  38.809  1.00 23.55      1SG 
ATOM   3738 HG21 THR   240      21.322  42.018  39.087  1.00   .00      1SG 
ATOM   3739 HG22 THR   240      19.970  43.144  39.488  1.00   .00      1SG 
ATOM   3740 HG23 THR   240      20.300  42.691  37.760  1.00   .00      1SG 
ATOM   3741  C   THR   240      18.432  39.418  40.493  1.00 14.68      1SG 
ATOM   3742  O   THR   240      18.875  38.331  40.851  1.00 14.52      1SG 
ATOM   3743  N   PHE   241      17.180  39.619  40.105  1.00 11.94      1SG 
ATOM   3744  HN  PHE   241      16.876  40.487  39.720  1.00   .00      1SG 
ATOM   3745  CA  PHE   241      16.172  38.580  40.219  1.00 14.36      1SG 
ATOM   3746  HA  PHE   241      16.659  37.643  40.445  1.00   .00      1SG 
ATOM   3747  CB  PHE   241      15.228  38.991  41.337  1.00 14.41      1SG 
ATOM   3748  HB1 PHE   241      14.394  38.261  41.408  1.00   .00      1SG 
ATOM   3749  HB2 PHE   241      14.829  40.008  41.134  1.00   .00      1SG 
ATOM   3750  CG  PHE   241      15.910  39.030  42.666  1.00 16.05      1SG 
ATOM   3751  CD1 PHE   241      16.012  37.871  43.427  1.00 17.65      1SG 
ATOM   3752  HD1 PHE   241      15.528  36.966  43.090  1.00   .00      1SG 
ATOM   3753  CE1 PHE   241      16.740  37.865  44.633  1.00 18.31      1SG 
ATOM   3754  HE1 PHE   241      16.813  36.962  45.221  1.00   .00      1SG 
ATOM   3755  CZ  PHE   241      17.364  39.034  45.060  1.00 18.74      1SG 
ATOM   3756  HZ  PHE   241      17.926  39.037  45.982  1.00   .00      1SG 
ATOM   3757  CD2 PHE   241      16.533  40.197  43.107  1.00 16.70      1SG 
ATOM   3758  HD2 PHE   241      16.449  41.102  42.523  1.00   .00      1SG 
ATOM   3759  CE2 PHE   241      17.266  40.206  44.300  1.00 18.24      1SG 
ATOM   3760  HE2 PHE   241      17.753  41.111  44.632  1.00   .00      1SG 
ATOM   3761  C   PHE   241      15.417  38.367  38.938  1.00 15.26      1SG 
ATOM   3762  O   PHE   241      15.498  39.201  38.020  1.00 15.63      1SG 
ATOM   3763  N   GLN   242      14.683  37.251  38.880  1.00 11.92      1SG 
ATOM   3764  HN  GLN   242      14.623  36.618  39.648  1.00   .00      1SG 
ATOM   3765  CA  GLN   242      13.919  36.884  37.685  1.00 12.08      1SG 
ATOM   3766  HA  GLN   242      13.842  37.756  37.053  1.00   .00      1SG 
ATOM   3767  CB  GLN   242      14.624  35.743  36.941  1.00 13.38      1SG 
ATOM   3768  HB1 GLN   242      14.097  35.571  35.979  1.00   .00      1SG 
ATOM   3769  HB2 GLN   242      14.554  34.823  37.559  1.00   .00      1SG 
ATOM   3770  CG  GLN   242      16.120  36.021  36.639  1.00 16.11      1SG 
ATOM   3771  HG1 GLN   242      16.653  36.220  37.593  1.00   .00      1SG 
ATOM   3772  HG2 GLN   242      16.200  36.914  35.984  1.00   .00      1SG 
ATOM   3773  CD  GLN   242      16.787  34.847  35.944  1.00 14.97      1SG 
ATOM   3774  OE1 GLN   242      16.206  33.756  35.867  1.00 14.84      1SG 
ATOM   3775  NE2 GLN   242      18.012  35.073  35.395  1.00 14.68      1SG 
ATOM   3776 HE21 GLN   242      18.494  34.333  34.926  1.00   .00      1SG 
ATOM   3777 HE22 GLN   242      18.430  35.979  35.461  1.00   .00      1SG 
ATOM   3778  C   GLN   242      12.567  36.361  38.119  1.00 14.18      1SG 
ATOM   3779  O   GLN   242      12.421  35.854  39.251  1.00 12.00      1SG 
ATOM   3780  N   LYS   243      11.582  36.484  37.223  1.00 13.17      1SG 
ATOM   3781  HN  LYS   243      11.708  36.941  36.346  1.00   .00      1SG 
ATOM   3782  CA  LYS   243      10.254  35.946  37.493  1.00 14.26      1SG 
ATOM   3783  HA  LYS   243      10.378  34.964  37.924  1.00   .00      1SG 
ATOM   3784  CB  LYS   243       9.457  36.846  38.454  1.00 16.97      1SG 
ATOM   3785  HB1 LYS   243       9.099  37.732  37.888  1.00   .00      1SG 
ATOM   3786  HB2 LYS   243      10.139  37.186  39.262  1.00   .00      1SG 
ATOM   3787  CG  LYS   243       8.223  36.150  39.111  1.00 14.25      1SG 
ATOM   3788  HG1 LYS   243       8.575  35.312  39.749  1.00   .00      1SG 
ATOM   3789  HG2 LYS   243       7.567  35.743  38.312  1.00   .00      1SG 
ATOM   3790  CD  LYS   243       7.405  37.143  39.983  1.00 15.28      1SG 
ATOM   3791  HD1 LYS   243       6.911  37.879  39.314  1.00   .00      1SG 
ATOM   3792  HD2 LYS   243       8.104  37.682  40.657  1.00   .00      1SG 
ATOM   3793  CE  LYS   243       6.318  36.451  40.848  1.00 20.92      1SG 
ATOM   3794  HE1 LYS   243       5.678  35.816  40.199  1.00   .00      1SG 
ATOM   3795  HE2 LYS   243       5.701  37.223  41.355  1.00   .00      1SG 
ATOM   3796  NZ  LYS   243       6.902  35.559  41.923  1.00 16.91      1SG 
ATOM   3797  HZ1 LYS   243       7.737  36.018  42.340  1.00   .00      1SG 
ATOM   3798  HZ2 LYS   243       7.180  34.648  41.505  1.00   .00      1SG 
ATOM   3799  HZ3 LYS   243       6.190  35.397  42.663  1.00   .00      1SG 
ATOM   3800  C   LYS   243       9.480  35.846  36.214  1.00 16.41      1SG 
ATOM   3801  O   LYS   243       9.720  36.605  35.263  1.00 16.51      1SG 
ATOM   3802  N   TRP   244       8.581  34.878  36.154  1.00 12.06      1SG 
ATOM   3803  HN  TRP   244       8.475  34.176  36.854  1.00   .00      1SG 
ATOM   3804  CA  TRP   244       7.694  34.829  35.005  1.00 15.63      1SG 
ATOM   3805  HA  TRP   244       7.627  35.831  34.609  1.00   .00      1SG 
ATOM   3806  CB  TRP   244       8.166  33.878  33.913  1.00 16.37      1SG 
ATOM   3807  HB1 TRP   244       9.138  34.256  33.534  1.00   .00      1SG 
ATOM   3808  HB2 TRP   244       7.417  33.906  33.094  1.00   .00      1SG 
ATOM   3809  CG  TRP   244       8.362  32.448  34.282  1.00 15.07      1SG 
ATOM   3810  CD1 TRP   244       9.558  31.822  34.481  1.00 17.43      1SG 
ATOM   3811  HD1 TRP   244      10.519  32.315  34.495  1.00   .00      1SG 
ATOM   3812  NE1 TRP   244       9.363  30.478  34.660  1.00 22.70      1SG 
ATOM   3813  HE1 TRP   244      10.066  29.820  34.820  1.00   .00      1SG 
ATOM   3814  CE2 TRP   244       8.022  30.206  34.579  1.00 21.18      1SG 
ATOM   3815  CD2 TRP   244       7.357  31.425  34.350  1.00 18.99      1SG 
ATOM   3816  CE3 TRP   244       5.954  31.425  34.227  1.00 20.25      1SG 
ATOM   3817  HE3 TRP   244       5.402  32.336  34.052  1.00   .00      1SG 
ATOM   3818  CZ3 TRP   244       5.273  30.222  34.334  1.00 23.15      1SG 
ATOM   3819  HZ3 TRP   244       4.197  30.210  34.244  1.00   .00      1SG 
ATOM   3820  CZ2 TRP   244       7.337  28.982  34.686  1.00 23.13      1SG 
ATOM   3821  HZ2 TRP   244       7.850  28.047  34.860  1.00   .00      1SG 
ATOM   3822  CH2 TRP   244       5.968  29.009  34.560  1.00 26.27      1SG 
ATOM   3823  HH2 TRP   244       5.412  28.087  34.635  1.00   .00      1SG 
ATOM   3824  C   TRP   244       6.297  34.435  35.468  1.00 19.69      1SG 
ATOM   3825  O   TRP   244       6.129  33.870  36.572  1.00 18.29      1SG 
ATOM   3826  N   ALA   245       5.322  34.757  34.619  1.00 17.27      1SG 
ATOM   3827  HN  ALA   245       5.519  35.226  33.762  1.00   .00      1SG 
ATOM   3828  CA  ALA   245       3.905  34.461  34.857  1.00 19.71      1SG 
ATOM   3829  HA  ALA   245       3.841  33.709  35.629  1.00   .00      1SG 
ATOM   3830  CB  ALA   245       3.160  35.761  35.296  1.00 17.94      1SG 
ATOM   3831  HB1 ALA   245       3.083  36.465  34.440  1.00   .00      1SG 
ATOM   3832  HB2 ALA   245       3.720  36.260  36.115  1.00   .00      1SG 
ATOM   3833  HB3 ALA   245       2.135  35.511  35.643  1.00   .00      1SG 
ATOM   3834  C   ALA   245       3.377  33.970  33.512  1.00 22.65      1SG 
ATOM   3835  O   ALA   245       3.722  34.523  32.470  1.00 20.83      1SG 
ATOM   3836  N   ALA   246       2.543  32.936  33.520  1.00 21.36      1SG 
ATOM   3837  HN  ALA   246       2.241  32.488  34.358  1.00   .00      1SG 
ATOM   3838  CA  ALA   246       2.025  32.405  32.258  1.00 23.96      1SG 
ATOM   3839  HA  ALA   246       2.214  33.130  31.481  1.00   .00      1SG 
ATOM   3840  CB  ALA   246       2.726  31.070  31.937  1.00 18.47      1SG 
ATOM   3841  HB1 ALA   246       2.536  30.334  32.748  1.00   .00      1SG 
ATOM   3842  HB2 ALA   246       3.822  31.229  31.852  1.00   .00      1SG 
ATOM   3843  HB3 ALA   246       2.333  30.656  30.984  1.00   .00      1SG 
ATOM   3844  C   ALA   246        .514  32.186  32.299  1.00 24.69      1SG 
ATOM   3845  O   ALA   246       -.069  32.010  33.372  1.00 28.45      1SG 
ATOM   3846  N   VAL   247       -.106  32.185  31.130  1.00 26.24      1SG 
ATOM   3847  HN  VAL   247        .372  32.345  30.270  1.00   .00      1SG 
ATOM   3848  CA  VAL   247      -1.538  31.947  31.043  1.00 28.21      1SG 
ATOM   3849  HA  VAL   247      -1.837  31.407  31.929  1.00   .00      1SG 
ATOM   3850  CB  VAL   247      -2.335  33.280  30.935  1.00 25.91      1SG 
ATOM   3851  HB  VAL   247      -2.192  33.868  31.867  1.00   .00      1SG 
ATOM   3852  CG1 VAL   247      -1.872  34.097  29.759  1.00 26.03      1SG 
ATOM   3853 HG11 VAL   247      -2.018  33.527  28.817  1.00   .00      1SG 
ATOM   3854 HG12 VAL   247       -.792  34.335  29.866  1.00   .00      1SG 
ATOM   3855 HG13 VAL   247      -2.459  35.038  29.698  1.00   .00      1SG 
ATOM   3856  CG2 VAL   247      -3.811  32.992  30.814  1.00 34.58      1SG 
ATOM   3857 HG21 VAL   247      -4.128  32.284  31.609  1.00   .00      1SG 
ATOM   3858 HG22 VAL   247      -4.027  32.535  29.825  1.00   .00      1SG 
ATOM   3859 HG23 VAL   247      -4.390  33.933  30.926  1.00   .00      1SG 
ATOM   3860  C   VAL   247      -1.742  31.093  29.802  1.00 28.24      1SG 
ATOM   3861  O   VAL   247       -.997  31.217  28.847  1.00 22.50      1SG 
ATOM   3862  N   VAL   248      -2.719  30.192  29.843  1.00 27.18      1SG 
ATOM   3863  HN  VAL   248      -3.288  30.058  30.651  1.00   .00      1SG 
ATOM   3864  CA  VAL   248      -3.015  29.340  28.693  1.00 27.72      1SG 
ATOM   3865  HA  VAL   248      -2.137  29.311  28.065  1.00   .00      1SG 
ATOM   3866  CB  VAL   248      -3.391  27.930  29.140  1.00 29.31      1SG 
ATOM   3867  HB  VAL   248      -4.266  27.977  29.823  1.00   .00      1SG 
ATOM   3868  CG1 VAL   248      -3.736  27.086  27.927  1.00 30.95      1SG 
ATOM   3869 HG11 VAL   248      -2.937  27.175  27.160  1.00   .00      1SG 
ATOM   3870 HG12 VAL   248      -4.693  27.434  27.484  1.00   .00      1SG 
ATOM   3871 HG13 VAL   248      -3.827  26.019  28.222  1.00   .00      1SG 
ATOM   3872  CG2 VAL   248      -2.222  27.315  29.907  1.00 32.00      1SG 
ATOM   3873 HG21 VAL   248      -1.985  27.931  30.800  1.00   .00      1SG 
ATOM   3874 HG22 VAL   248      -1.323  27.273  29.256  1.00   .00      1SG 
ATOM   3875 HG23 VAL   248      -2.488  26.290  30.244  1.00   .00      1SG 
ATOM   3876  C   VAL   248      -4.193  29.974  27.983  1.00 32.15      1SG 
ATOM   3877  O   VAL   248      -5.226  30.204  28.591  1.00 32.17      1SG 
ATOM   3878  N   VAL   249      -4.045  30.262  26.698  1.00 33.03      1SG 
ATOM   3879  HN  VAL   249      -3.222  30.043  26.179  1.00   .00      1SG 
ATOM   3880  CA  VAL   249      -5.120  30.930  25.989  1.00 33.15      1SG 
ATOM   3881  HA  VAL   249      -5.982  30.964  26.639  1.00   .00      1SG 
ATOM   3882  CB  VAL   249      -4.689  32.358  25.591  1.00 30.52      1SG 
ATOM   3883  HB  VAL   249      -5.584  32.955  25.313  1.00   .00      1SG 
ATOM   3884  CG1 VAL   249      -3.978  33.016  26.772  1.00 34.01      1SG 
ATOM   3885 HG11 VAL   249      -2.990  32.536  26.939  1.00   .00      1SG 
ATOM   3886 HG12 VAL   249      -4.588  32.900  27.693  1.00   .00      1SG 
ATOM   3887 HG13 VAL   249      -3.817  34.095  26.563  1.00   .00      1SG 
ATOM   3888  CG2 VAL   249      -3.766  32.333  24.384  1.00 31.42      1SG 
ATOM   3889 HG21 VAL   249      -4.334  32.039  23.475  1.00   .00      1SG 
ATOM   3890 HG22 VAL   249      -2.951  31.596  24.547  1.00   .00      1SG 
ATOM   3891 HG23 VAL   249      -3.331  33.342  24.220  1.00   .00      1SG 
ATOM   3892  C   VAL   249      -5.564  30.171  24.767  1.00 30.17      1SG 
ATOM   3893  O   VAL   249      -4.825  29.366  24.228  1.00 31.05      1SG 
ATOM   3894  N   PRO   250      -6.813  30.398  24.333  1.00 35.69      1SG 
ATOM   3895  CD  PRO   250      -7.873  31.215  24.944  1.00 37.57      1SG 
ATOM   3896  HD1 PRO   250      -7.867  32.241  24.520  1.00   .00      1SG 
ATOM   3897  HD2 PRO   250      -7.745  31.258  26.046  1.00   .00      1SG 
ATOM   3898  CA  PRO   250      -7.302  29.693  23.144  1.00 34.82      1SG 
ATOM   3899  HA  PRO   250      -7.086  28.639  23.217  1.00   .00      1SG 
ATOM   3900  CB  PRO   250      -8.793  30.038  23.112  1.00 37.22      1SG 
ATOM   3901  HB1 PRO   250      -9.398  29.158  22.805  1.00   .00      1SG 
ATOM   3902  HB2 PRO   250      -8.992  30.874  22.408  1.00   .00      1SG 
ATOM   3903  CG  PRO   250      -9.113  30.446  24.547  1.00 39.22      1SG 
ATOM   3904  HG1 PRO   250     -10.020  31.086  24.594  1.00   .00      1SG 
ATOM   3905  HG2 PRO   250      -9.265  29.558  25.197  1.00   .00      1SG 
ATOM   3906  C   PRO   250      -6.562  30.276  21.953  1.00 33.90      1SG 
ATOM   3907  O   PRO   250      -6.480  31.492  21.825  1.00 33.19      1SG 
ATOM   3908  N   SER   251      -6.004  29.425  21.093  1.00 37.68      1SG 
ATOM   3909  HN  SER   251      -6.050  28.435  21.198  1.00   .00      1SG 
ATOM   3910  CA  SER   251      -5.287  29.938  19.935  1.00 40.06      1SG 
ATOM   3911  HA  SER   251      -4.432  30.493  20.292  1.00   .00      1SG 
ATOM   3912  CB  SER   251      -4.829  28.785  19.013  1.00 44.13      1SG 
ATOM   3913  HB1 SER   251      -4.018  28.217  19.517  1.00   .00      1SG 
ATOM   3914  HB2 SER   251      -4.446  29.211  18.061  1.00   .00      1SG 
ATOM   3915  OG  SER   251      -5.876  27.878  18.702  1.00 49.21      1SG 
ATOM   3916  HG1 SER   251      -5.458  27.130  18.268  1.00   .00      1SG 
ATOM   3917  C   SER   251      -6.194  30.915  19.192  1.00 43.33      1SG 
ATOM   3918  O   SER   251      -7.387  30.667  19.024  1.00 44.20      1SG 
ATOM   3919  N   GLY   252      -5.633  32.039  18.771  1.00 43.41      1SG 
ATOM   3920  HN  GLY   252      -4.669  32.248  18.913  1.00   .00      1SG 
ATOM   3921  CA  GLY   252      -6.420  33.030  18.071  1.00 43.46      1SG 
ATOM   3922  HA1 GLY   252      -7.265  32.525  17.628  1.00   .00      1SG 
ATOM   3923  HA2 GLY   252      -5.797  33.460  17.301  1.00   .00      1SG 
ATOM   3924  C   GLY   252      -6.929  34.143  18.970  1.00 44.39      1SG 
ATOM   3925  O   GLY   252      -7.318  35.196  18.469  1.00 47.28      1SG 
ATOM   3926  N   GLN   253      -6.943  33.925  20.288  1.00 42.62      1SG 
ATOM   3927  HN  GLN   253      -6.638  33.067  20.695  1.00   .00      1SG 
ATOM   3928  CA  GLN   253      -7.417  34.957  21.211  1.00 39.75      1SG 
ATOM   3929  HA  GLN   253      -7.924  35.716  20.634  1.00   .00      1SG 
ATOM   3930  CB  GLN   253      -8.371  34.349  22.249  1.00 44.91      1SG 
ATOM   3931  HB1 GLN   253      -8.666  35.149  22.960  1.00   .00      1SG 
ATOM   3932  HB2 GLN   253      -7.823  33.558  22.803  1.00   .00      1SG 
ATOM   3933  CG  GLN   253      -9.640  33.734  21.670  1.00 45.87      1SG 
ATOM   3934  HG1 GLN   253      -9.372  32.807  21.119  1.00   .00      1SG 
ATOM   3935  HG2 GLN   253     -10.101  34.457  20.965  1.00   .00      1SG 
ATOM   3936  CD  GLN   253     -10.670  33.379  22.741  1.00 50.05      1SG 
ATOM   3937  OE1 GLN   253     -11.656  32.699  22.461  1.00 53.28      1SG 
ATOM   3938  NE2 GLN   253     -10.447  33.844  23.967  1.00 49.23      1SG 
ATOM   3939 HE21 GLN   253      -9.635  34.398  24.152  1.00   .00      1SG 
ATOM   3940 HE22 GLN   253     -11.091  33.640  24.704  1.00   .00      1SG 
ATOM   3941  C   GLN   253      -6.280  35.685  21.948  1.00 39.02      1SG 
ATOM   3942  O   GLN   253      -6.536  36.441  22.890  1.00 38.66      1SG 
ATOM   3943  N   GLU   254      -5.038  35.467  21.515  1.00 35.56      1SG 
ATOM   3944  HN  GLU   254      -4.846  34.872  20.738  1.00   .00      1SG 
ATOM   3945  CA  GLU   254      -3.873  36.088  22.153  1.00 34.57      1SG 
ATOM   3946  HA  GLU   254      -3.734  35.622  23.117  1.00   .00      1SG 
ATOM   3947  CB  GLU   254      -2.612  35.912  21.290  1.00 33.99      1SG 
ATOM   3948  HB1 GLU   254      -1.829  36.597  21.678  1.00   .00      1SG 
ATOM   3949  HB2 GLU   254      -2.862  36.203  20.248  1.00   .00      1SG 
ATOM   3950  CG  GLU   254      -2.037  34.500  21.263  1.00 38.18      1SG 
ATOM   3951  HG1 GLU   254      -2.039  34.093  22.296  1.00   .00      1SG 
ATOM   3952  HG2 GLU   254       -.991  34.546  20.891  1.00   .00      1SG 
ATOM   3953  CD  GLU   254      -2.820  33.549  20.372  1.00 39.32      1SG 
ATOM   3954  OE1 GLU   254      -3.806  33.999  19.750  1.00 39.30      1SG 
ATOM   3955  OE2 GLU   254      -2.444  32.357  20.292  1.00 41.16      1SG 
ATOM   3956  C   GLU   254      -4.048  37.566  22.444  1.00 35.12      1SG 
ATOM   3957  O   GLU   254      -3.635  38.059  23.493  1.00 31.33      1SG 
ATOM   3958  N   GLN   255      -4.650  38.285  21.507  1.00 36.73      1SG 
ATOM   3959  HN  GLN   255      -4.991  37.889  20.658  1.00   .00      1SG 
ATOM   3960  CA  GLN   255      -4.841  39.717  21.687  1.00 37.03      1SG 
ATOM   3961  HA  GLN   255      -3.902  40.144  22.007  1.00   .00      1SG 
ATOM   3962  CB  GLN   255      -5.303  40.361  20.368  1.00 45.87      1SG 
ATOM   3963  HB1 GLN   255      -4.527  40.164  19.599  1.00   .00      1SG 
ATOM   3964  HB2 GLN   255      -5.382  41.457  20.529  1.00   .00      1SG 
ATOM   3965  CG  GLN   255      -6.642  39.864  19.828  1.00 51.77      1SG 
ATOM   3966  HG1 GLN   255      -6.830  40.337  18.841  1.00   .00      1SG 
ATOM   3967  HG2 GLN   255      -7.447  40.161  20.533  1.00   .00      1SG 
ATOM   3968  CD  GLN   255      -6.687  38.357  19.655  1.00 58.63      1SG 
ATOM   3969  OE1 GLN   255      -5.785  37.754  19.058  1.00 60.16      1SG 
ATOM   3970  NE2 GLN   255      -7.743  37.735  20.176  1.00 61.77      1SG 
ATOM   3971 HE21 GLN   255      -7.908  36.771  19.969  1.00   .00      1SG 
ATOM   3972 HE22 GLN   255      -8.371  38.232  20.775  1.00   .00      1SG 
ATOM   3973  C   GLN   255      -5.770  40.109  22.831  1.00 34.55      1SG 
ATOM   3974  O   GLN   255      -5.780  41.268  23.228  1.00 37.16      1SG 
ATOM   3975  N   ARG   256      -6.543  39.168  23.368  1.00 33.28      1SG 
ATOM   3976  HN  ARG   256      -6.555  38.225  23.043  1.00   .00      1SG 
ATOM   3977  CA  ARG   256      -7.427  39.495  24.485  1.00 34.61      1SG 
ATOM   3978  HA  ARG   256      -7.881  40.454  24.283  1.00   .00      1SG 
ATOM   3979  CB  ARG   256      -8.509  38.419  24.654  1.00 39.97      1SG 
ATOM   3980  HB1 ARG   256      -9.075  38.637  25.584  1.00   .00      1SG 
ATOM   3981  HB2 ARG   256      -8.007  37.434  24.760  1.00   .00      1SG 
ATOM   3982  CG  ARG   256      -9.511  38.328  23.489  1.00 46.08      1SG 
ATOM   3983  HG1 ARG   256      -8.957  38.098  22.554  1.00   .00      1SG 
ATOM   3984  HG2 ARG   256     -10.020  39.309  23.373  1.00   .00      1SG 
ATOM   3985  CD  ARG   256     -10.572  37.239  23.722  1.00 54.20      1SG 
ATOM   3986  HD1 ARG   256     -10.069  36.282  23.978  1.00   .00      1SG 
ATOM   3987  HD2 ARG   256     -11.182  37.115  22.802  1.00   .00      1SG 
ATOM   3988  NE  ARG   256     -11.493  37.557  24.819  1.00 57.03      1SG 
ATOM   3989  HE  ARG   256     -11.439  38.469  25.224  1.00   .00      1SG 
ATOM   3990  CZ  ARG   256     -12.397  36.710  25.312  1.00 58.90      1SG 
ATOM   3991  NH1 ARG   256     -12.509  35.485  24.809  1.00 58.63      1SG 
ATOM   3992 HH11 ARG   256     -11.914  35.196  24.059  1.00   .00      1SG 
ATOM   3993 HH12 ARG   256     -13.188  34.852  25.181  1.00   .00      1SG 
ATOM   3994  NH2 ARG   256     -13.186  37.079  26.312  1.00 56.43      1SG 
ATOM   3995 HH21 ARG   256     -13.105  37.997  26.700  1.00   .00      1SG 
ATOM   3996 HH22 ARG   256     -13.862  36.439  26.678  1.00   .00      1SG 
ATOM   3997  C   ARG   256      -6.610  39.593  25.788  1.00 35.32      1SG 
ATOM   3998  O   ARG   256      -7.111  40.065  26.807  1.00 36.00      1SG 
ATOM   3999  N   TYR   257      -5.344  39.184  25.737  1.00 30.17      1SG 
ATOM   4000  HN  TYR   257      -4.922  38.862  24.893  1.00   .00      1SG 
ATOM   4001  CA  TYR   257      -4.492  39.184  26.928  1.00 29.44      1SG 
ATOM   4002  HA  TYR   257      -5.099  39.454  27.780  1.00   .00      1SG 
ATOM   4003  CB  TYR   257      -3.886  37.802  27.119  1.00 27.04      1SG 
ATOM   4004  HB1 TYR   257      -3.287  37.787  28.055  1.00   .00      1SG 
ATOM   4005  HB2 TYR   257      -3.241  37.557  26.248  1.00   .00      1SG 
ATOM   4006  CG  TYR   257      -4.917  36.726  27.229  1.00 31.88      1SG 
ATOM   4007  CD1 TYR   257      -5.641  36.307  26.107  1.00 32.34      1SG 
ATOM   4008  HD1 TYR   257      -5.459  36.771  25.149  1.00   .00      1SG 
ATOM   4009  CE1 TYR   257      -6.583  35.308  26.213  1.00 28.79      1SG 
ATOM   4010  HE1 TYR   257      -7.139  34.990  25.343  1.00   .00      1SG 
ATOM   4011  CZ  TYR   257      -6.812  34.716  27.439  1.00 31.70      1SG 
ATOM   4012  OH  TYR   257      -7.748  33.733  27.552  1.00 33.36      1SG 
ATOM   4013  HH  TYR   257      -7.401  33.059  28.141  1.00   .00      1SG 
ATOM   4014  CD2 TYR   257      -5.175  36.109  28.450  1.00 31.82      1SG 
ATOM   4015  HD2 TYR   257      -4.629  36.422  29.328  1.00   .00      1SG 
ATOM   4016  CE2 TYR   257      -6.113  35.107  28.559  1.00 29.12      1SG 
ATOM   4017  HE2 TYR   257      -6.298  34.633  29.512  1.00   .00      1SG 
ATOM   4018  C   TYR   257      -3.366  40.193  27.017  1.00 28.05      1SG 
ATOM   4019  O   TYR   257      -2.665  40.475  26.039  1.00 31.08      1SG 
ATOM   4020  N   THR   258      -3.185  40.732  28.213  1.00 28.41      1SG 
ATOM   4021  HN  THR   258      -3.765  40.516  28.995  1.00   .00      1SG 
ATOM   4022  CA  THR   258      -2.115  41.678  28.440  1.00 25.98      1SG 
ATOM   4023  HA  THR   258      -1.415  41.588  27.622  1.00   .00      1SG 
ATOM   4024  CB  THR   258      -2.644  43.117  28.526  1.00 27.65      1SG 
ATOM   4025  HB  THR   258      -1.812  43.812  28.767  1.00   .00      1SG 
ATOM   4026  OG1 THR   258      -3.638  43.203  29.558  1.00 30.53      1SG 
ATOM   4027  HG1 THR   258      -4.335  42.593  29.306  1.00   .00      1SG 
ATOM   4028  CG2 THR   258      -3.256  43.513  27.192  1.00 33.09      1SG 
ATOM   4029 HG21 THR   258      -4.201  42.953  27.024  1.00   .00      1SG 
ATOM   4030 HG22 THR   258      -2.551  43.275  26.367  1.00   .00      1SG 
ATOM   4031 HG23 THR   258      -3.483  44.600  27.188  1.00   .00      1SG 
ATOM   4032  C   THR   258      -1.449  41.299  29.752  1.00 26.77      1SG 
ATOM   4033  O   THR   258      -2.107  40.794  30.661  1.00 26.70      1SG 
ATOM   4034  N   CYS   259       -.144  41.530  29.835  1.00 27.65      1SG 
ATOM   4035  HN  CYS   259        .374  41.923  29.079  1.00   .00      1SG 
ATOM   4036  CA  CYS   259        .615  41.222  31.040  1.00 25.80      1SG 
ATOM   4037  HA  CYS   259       -.034  40.677  31.710  1.00   .00      1SG 
ATOM   4038  CB  CYS   259       1.849  40.396  30.720  1.00 29.83      1SG 
ATOM   4039  HB1 CYS   259       2.351  40.835  29.832  1.00   .00      1SG 
ATOM   4040  HB2 CYS   259       1.530  39.363  30.465  1.00   .00      1SG 
ATOM   4041  SG  CYS   259       3.017  40.349  32.123  1.00 30.74      1SG 
ATOM   4042  HG1 CYS   259       3.377  41.620  32.016  1.00   .00      1SG 
ATOM   4043  C   CYS   259       1.050  42.538  31.615  1.00 25.68      1SG 
ATOM   4044  O   CYS   259       1.560  43.399  30.893  1.00 29.98      1SG 
ATOM   4045  N   HSE   260        .859  42.692  32.916  1.00 24.44      1SG 
ATOM   4046  HN  HSE   260        .491  41.970  33.497  1.00   .00      1SG 
ATOM   4047  CA  HSE   260       1.186  43.948  33.563  1.00 26.32      1SG 
ATOM   4048  HA  HSE   260       1.568  44.629  32.818  1.00   .00      1SG 
ATOM   4049  CB  HSE   260       -.079  44.507  34.211  1.00 28.36      1SG 
ATOM   4050  HB1 HSE   260        .136  45.523  34.604  1.00   .00      1SG 
ATOM   4051  HB2 HSE   260       -.376  43.845  35.052  1.00   .00      1SG 
ATOM   4052  ND1 HSE   260      -1.549  45.765  32.585  1.00 37.88      1SG 
ATOM   4053  CG  HSE   260      -1.227  44.601  33.251  1.00 34.54      1SG 
ATOM   4054  CE1 HSE   260      -2.532  45.526  31.732  1.00 38.47      1SG 
ATOM   4055  HE1 HSE   260      -3.005  46.240  31.059  1.00   .00      1SG 
ATOM   4056  NE2 HSE   260      -2.862  44.249  31.824  1.00 37.14      1SG 
ATOM   4057  HE2 HSE   260      -3.575  43.783  31.300  1.00   .00      1SG 
ATOM   4058  CD2 HSE   260      -2.062  43.647  32.767  1.00 32.87      1SG 
ATOM   4059  HD2 HSE   260      -2.135  42.599  33.030  1.00   .00      1SG 
ATOM   4060  C   HSE   260       2.278  43.715  34.565  1.00 24.56      1SG 
ATOM   4061  O   HSE   260       2.214  42.790  35.373  1.00 26.79      1SG 
ATOM   4062  N   VAL   261       3.279  44.568  34.490  1.00 23.00      1SG 
ATOM   4063  HN  VAL   261       3.278  45.322  33.838  1.00   .00      1SG 
ATOM   4064  CA  VAL   261       4.450  44.474  35.345  1.00 24.06      1SG 
ATOM   4065  HA  VAL   261       4.339  43.603  35.974  1.00   .00      1SG 
ATOM   4066  CB  VAL   261       5.727  44.360  34.489  1.00 27.06      1SG 
ATOM   4067  HB  VAL   261       5.867  45.298  33.911  1.00   .00      1SG 
ATOM   4068  CG1 VAL   261       6.952  44.124  35.376  1.00 23.06      1SG 
ATOM   4069 HG11 VAL   261       6.756  43.290  36.083  1.00   .00      1SG 
ATOM   4070 HG12 VAL   261       7.177  45.041  35.962  1.00   .00      1SG 
ATOM   4071 HG13 VAL   261       7.828  43.858  34.747  1.00   .00      1SG 
ATOM   4072  CG2 VAL   261       5.536  43.262  33.454  1.00 24.38      1SG 
ATOM   4073 HG21 VAL   261       4.796  43.582  32.690  1.00   .00      1SG 
ATOM   4074 HG22 VAL   261       5.161  42.339  33.946  1.00   .00      1SG 
ATOM   4075 HG23 VAL   261       6.501  43.049  32.946  1.00   .00      1SG 
ATOM   4076  C   VAL   261       4.601  45.719  36.180  1.00 25.44      1SG 
ATOM   4077  O   VAL   261       4.639  46.826  35.641  1.00 27.35      1SG 
ATOM   4078  N   GLN   262       4.715  45.540  37.490  1.00 25.93      1SG 
ATOM   4079  HN  GLN   262       4.660  44.640  37.915  1.00   .00      1SG 
ATOM   4080  CA  GLN   262       4.929  46.664  38.379  1.00 25.43      1SG 
ATOM   4081  HA  GLN   262       5.012  47.557  37.778  1.00   .00      1SG 
ATOM   4082  CB  GLN   262       3.779  46.788  39.351  1.00 30.57      1SG 
ATOM   4083  HB1 GLN   262       3.945  47.681  39.989  1.00   .00      1SG 
ATOM   4084  HB2 GLN   262       3.757  45.884  39.996  1.00   .00      1SG 
ATOM   4085  CG  GLN   262       2.446  46.925  38.663  1.00 38.90      1SG 
ATOM   4086  HG1 GLN   262       2.239  46.007  38.073  1.00   .00      1SG 
ATOM   4087  HG2 GLN   262       2.472  47.800  37.979  1.00   .00      1SG 
ATOM   4088  CD  GLN   262       1.348  47.120  39.657  1.00 41.64      1SG 
ATOM   4089  OE1 GLN   262       1.205  48.203  40.235  1.00 44.80      1SG 
ATOM   4090  NE2 GLN   262        .573  46.063  39.895  1.00 40.27      1SG 
ATOM   4091 HE21 GLN   262       -.179  46.132  40.551  1.00   .00      1SG 
ATOM   4092 HE22 GLN   262        .743  45.201  39.418  1.00   .00      1SG 
ATOM   4093  C   GLN   262       6.215  46.443  39.140  1.00 23.22      1SG 
ATOM   4094  O   GLN   262       6.448  45.364  39.667  1.00 24.51      1SG 
ATOM   4095  N   HSE   263       7.048  47.470  39.200  1.00 26.88      1SG 
ATOM   4096  HN  HSE   263       6.844  48.348  38.774  1.00   .00      1SG 
ATOM   4097  CA  HSE   263       8.327  47.371  39.902  1.00 25.30      1SG 
ATOM   4098  HA  HSE   263       8.171  46.795  40.802  1.00   .00      1SG 
ATOM   4099  CB  HSE   263       9.380  46.695  39.011  1.00 21.97      1SG 
ATOM   4100  HB1 HSE   263       9.539  47.323  38.109  1.00   .00      1SG 
ATOM   4101  HB2 HSE   263       8.998  45.700  38.701  1.00   .00      1SG 
ATOM   4102  ND1 HSE   263      10.985  45.403  40.480  1.00 24.74      1SG 
ATOM   4103  CG  HSE   263      10.705  46.499  39.685  1.00 22.01      1SG 
ATOM   4104  CE1 HSE   263      12.214  45.508  40.961  1.00 13.97      1SG 
ATOM   4105  HE1 HSE   263      12.726  44.806  41.618  1.00   .00      1SG 
ATOM   4106  NE2 HSE   263      12.739  46.632  40.505  1.00 26.24      1SG 
ATOM   4107  HE2 HSE   263      13.657  46.977  40.701  1.00   .00      1SG 
ATOM   4108  CD2 HSE   263      11.816  47.268  39.705  1.00 13.82      1SG 
ATOM   4109  HD2 HSE   263      12.007  48.212  39.210  1.00   .00      1SG 
ATOM   4110  C   HSE   263       8.788  48.768  40.242  1.00 27.27      1SG 
ATOM   4111  O   HSE   263       8.655  49.687  39.426  1.00 27.36      1SG 
ATOM   4112  N   GLU   264       9.366  48.935  41.425  1.00 28.46      1SG 
ATOM   4113  HN  GLU   264       9.522  48.190  42.069  1.00   .00      1SG 
ATOM   4114  CA  GLU   264       9.802  50.264  41.824  1.00 34.33      1SG 
ATOM   4115  HA  GLU   264       8.956  50.930  41.740  1.00   .00      1SG 
ATOM   4116  CB  GLU   264      10.333  50.261  43.259  1.00 37.21      1SG 
ATOM   4117  HB1 GLU   264       9.503  49.959  43.931  1.00   .00      1SG 
ATOM   4118  HB2 GLU   264      10.644  51.296  43.512  1.00   .00      1SG 
ATOM   4119  CG  GLU   264      11.506  49.343  43.523  1.00 47.67      1SG 
ATOM   4120  HG1 GLU   264      12.402  49.730  42.992  1.00   .00      1SG 
ATOM   4121  HG2 GLU   264      11.269  48.326  43.144  1.00   .00      1SG 
ATOM   4122  CD  GLU   264      11.818  49.253  45.014  1.00 54.05      1SG 
ATOM   4123  OE1 GLU   264      12.510  50.162  45.536  1.00 53.35      1SG 
ATOM   4124  OE2 GLU   264      11.344  48.281  45.660  1.00 56.18      1SG 
ATOM   4125  C   GLU   264      10.828  50.875  40.891  1.00 34.07      1SG 
ATOM   4126  O   GLU   264      11.073  52.069  40.956  1.00 39.27      1SG 
ATOM   4127  N   GLY   265      11.426  50.074  40.022  1.00 33.35      1SG 
ATOM   4128  HN  GLY   265      11.244  49.095  39.967  1.00   .00      1SG 
ATOM   4129  CA  GLY   265      12.397  50.622  39.094  1.00 36.55      1SG 
ATOM   4130  HA1 GLY   265      13.107  49.845  38.853  1.00   .00      1SG 
ATOM   4131  HA2 GLY   265      12.898  51.446  39.580  1.00   .00      1SG 
ATOM   4132  C   GLY   265      11.740  51.119  37.810  1.00 38.74      1SG 
ATOM   4133  O   GLY   265      12.404  51.699  36.954  1.00 40.49      1SG 
ATOM   4134  N   LEU   266      10.435  50.894  37.680  1.00 38.54      1SG 
ATOM   4135  HN  LEU   266       9.907  50.436  38.390  1.00   .00      1SG 
ATOM   4136  CA  LEU   266       9.687  51.302  36.490  1.00 40.80      1SG 
ATOM   4137  HA  LEU   266      10.392  51.461  35.688  1.00   .00      1SG 
ATOM   4138  CB  LEU   266       8.669  50.218  36.102  1.00 38.47      1SG 
ATOM   4139  HB1 LEU   266       7.984  50.665  35.353  1.00   .00      1SG 
ATOM   4140  HB2 LEU   266       8.093  49.967  37.016  1.00   .00      1SG 
ATOM   4141  CG  LEU   266       9.185  48.896  35.513  1.00 33.86      1SG 
ATOM   4142  HG  LEU   266       9.986  48.489  36.166  1.00   .00      1SG 
ATOM   4143  CD1 LEU   266       8.049  47.883  35.412  1.00 30.71      1SG 
ATOM   4144 HD11 LEU   266       7.172  48.342  34.908  1.00   .00      1SG 
ATOM   4145 HD12 LEU   266       7.743  47.555  36.428  1.00   .00      1SG 
ATOM   4146 HD13 LEU   266       8.378  47.003  34.819  1.00   .00      1SG 
ATOM   4147  CD2 LEU   266       9.792  49.151  34.143  1.00 32.99      1SG 
ATOM   4148 HD21 LEU   266      10.638  49.866  34.227  1.00   .00      1SG 
ATOM   4149 HD22 LEU   266       9.027  49.586  33.465  1.00   .00      1SG 
ATOM   4150 HD23 LEU   266      10.173  48.199  33.715  1.00   .00      1SG 
ATOM   4151  C   LEU   266       8.941  52.624  36.668  1.00 43.09      1SG 
ATOM   4152  O   LEU   266       8.124  52.764  37.575  1.00 43.27      1SG 
ATOM   4153  N   PRO   267       9.206  53.603  35.780  1.00 47.18      1SG 
ATOM   4154  CD  PRO   267       9.994  53.403  34.546  1.00 47.98      1SG 
ATOM   4155  HD1 PRO   267       9.451  52.732  33.848  1.00   .00      1SG 
ATOM   4156  HD2 PRO   267      10.987  52.972  34.791  1.00   .00      1SG 
ATOM   4157  CA  PRO   267       8.578  54.932  35.795  1.00 48.35      1SG 
ATOM   4158  HA  PRO   267       9.014  55.548  36.566  1.00   .00      1SG 
ATOM   4159  CB  PRO   267       8.805  55.431  34.373  1.00 51.98      1SG 
ATOM   4160  HB1 PRO   267       8.869  56.539  34.342  1.00   .00      1SG 
ATOM   4161  HB2 PRO   267       7.990  55.099  33.696  1.00   .00      1SG 
ATOM   4162  CG  PRO   267      10.113  54.802  33.996  1.00 52.51      1SG 
ATOM   4163  HG1 PRO   267      10.249  54.789  32.894  1.00   .00      1SG 
ATOM   4164  HG2 PRO   267      10.966  55.343  34.457  1.00   .00      1SG 
ATOM   4165  C   PRO   267       7.096  54.736  36.082  1.00 50.19      1SG 
ATOM   4166  O   PRO   267       6.540  55.293  37.029  1.00 50.99      1SG 
ATOM   4167  N   LYS   268       6.476  53.920  35.236  1.00 49.95      1SG 
ATOM   4168  HN  LYS   268       6.960  53.504  34.471  1.00   .00      1SG 
ATOM   4169  CA  LYS   268       5.067  53.567  35.346  1.00 50.89      1SG 
ATOM   4170  HA  LYS   268       4.761  53.727  36.369  1.00   .00      1SG 
ATOM   4171  CB  LYS   268       4.219  54.424  34.395  1.00 53.40      1SG 
ATOM   4172  HB1 LYS   268       4.386  55.493  34.646  1.00   .00      1SG 
ATOM   4173  HB2 LYS   268       3.150  54.177  34.563  1.00   .00      1SG 
ATOM   4174  CG  LYS   268       4.530  54.225  32.912  1.00 58.51      1SG 
ATOM   4175  HG1 LYS   268       3.720  54.690  32.310  1.00   .00      1SG 
ATOM   4176  HG2 LYS   268       4.559  53.136  32.695  1.00   .00      1SG 
ATOM   4177  CD  LYS   268       5.867  54.846  32.504  1.00 61.30      1SG 
ATOM   4178  HD1 LYS   268       6.149  54.473  31.496  1.00   .00      1SG 
ATOM   4179  HD2 LYS   268       6.648  54.539  33.232  1.00   .00      1SG 
ATOM   4180  CE  LYS   268       5.788  56.375  32.469  1.00 63.46      1SG 
ATOM   4181  HE1 LYS   268       5.452  56.749  33.460  1.00   .00      1SG 
ATOM   4182  HE2 LYS   268       5.072  56.689  31.680  1.00   .00      1SG 
ATOM   4183  NZ  LYS   268       7.098  57.026  32.167  1.00 64.07      1SG 
ATOM   4184  HZ1 LYS   268       7.437  56.708  31.237  1.00   .00      1SG 
ATOM   4185  HZ2 LYS   268       7.791  56.765  32.897  1.00   .00      1SG 
ATOM   4186  HZ3 LYS   268       6.978  58.059  32.158  1.00   .00      1SG 
ATOM   4187  C   LYS   268       4.956  52.082  34.960  1.00 47.53      1SG 
ATOM   4188  O   LYS   268       5.804  51.559  34.231  1.00 46.87      1SG 
ATOM   4189  N   PRO   269       3.917  51.385  35.453  1.00 47.73      1SG 
ATOM   4190  CD  PRO   269       2.838  51.901  36.316  1.00 47.48      1SG 
ATOM   4191  HD1 PRO   269       2.100  52.469  35.713  1.00   .00      1SG 
ATOM   4192  HD2 PRO   269       3.258  52.550  37.112  1.00   .00      1SG 
ATOM   4193  CA  PRO   269       3.706  49.962  35.153  1.00 46.53      1SG 
ATOM   4194  HA  PRO   269       4.490  49.364  35.589  1.00   .00      1SG 
ATOM   4195  CB  PRO   269       2.311  49.696  35.714  1.00 48.87      1SG 
ATOM   4196  HB1 PRO   269       2.200  48.639  36.035  1.00   .00      1SG 
ATOM   4197  HB2 PRO   269       1.524  49.929  34.966  1.00   .00      1SG 
ATOM   4198  CG  PRO   269       2.243  50.629  36.882  1.00 48.55      1SG 
ATOM   4199  HG1 PRO   269       1.195  50.785  37.215  1.00   .00      1SG 
ATOM   4200  HG2 PRO   269       2.839  50.249  37.739  1.00   .00      1SG 
ATOM   4201  C   PRO   269       3.780  49.686  33.649  1.00 44.73      1SG 
ATOM   4202  O   PRO   269       3.379  50.525  32.839  1.00 41.82      1SG 
ATOM   4203  N   LEU   270       4.309  48.524  33.276  1.00 39.66      1SG 
ATOM   4204  HN  LEU   270       4.653  47.854  33.930  1.00   .00      1SG 
ATOM   4205  CA  LEU   270       4.410  48.174  31.869  1.00 37.97      1SG 
ATOM   4206  HA  LEU   270       4.380  49.090  31.297  1.00   .00      1SG 
ATOM   4207  CB  LEU   270       5.698  47.415  31.576  1.00 34.73      1SG 
ATOM   4208  HB1 LEU   270       5.664  47.111  30.510  1.00   .00      1SG 
ATOM   4209  HB2 LEU   270       5.695  46.506  32.212  1.00   .00      1SG 
ATOM   4210  CG  LEU   270       7.029  48.116  31.801  1.00 40.67      1SG 
ATOM   4211  HG  LEU   270       7.062  48.550  32.823  1.00   .00      1SG 
ATOM   4212  CD1 LEU   270       8.140  47.083  31.637  1.00 35.59      1SG 
ATOM   4213 HD11 LEU   270       8.110  46.649  30.615  1.00   .00      1SG 
ATOM   4214 HD12 LEU   270       8.006  46.263  32.375  1.00   .00      1SG 
ATOM   4215 HD13 LEU   270       9.130  47.565  31.788  1.00   .00      1SG 
ATOM   4216  CD2 LEU   270       7.201  49.265  30.821  1.00 37.77      1SG 
ATOM   4217 HD21 LEU   270       6.384  50.006  30.954  1.00   .00      1SG 
ATOM   4218 HD22 LEU   270       7.166  48.882  29.779  1.00   .00      1SG 
ATOM   4219 HD23 LEU   270       8.173  49.773  31.000  1.00   .00      1SG 
ATOM   4220  C   LEU   270       3.248  47.295  31.479  1.00 36.29      1SG 
ATOM   4221  O   LEU   270       2.699  46.573  32.307  1.00 34.71      1SG 
ATOM   4222  N   THR   271       2.869  47.379  30.210  1.00 35.05      1SG 
ATOM   4223  HN  THR   271       3.304  48.006  29.569  1.00   .00      1SG 
ATOM   4224  CA  THR   271       1.798  46.565  29.675  1.00 34.34      1SG 
ATOM   4225  HA  THR   271       1.465  45.901  30.459  1.00   .00      1SG 
ATOM   4226  CB  THR   271        .630  47.421  29.181  1.00 36.54      1SG 
ATOM   4227  HB  THR   271        .980  48.126  28.397  1.00   .00      1SG 
ATOM   4228  OG1 THR   271        .102  48.166  30.277  1.00 40.07      1SG 
ATOM   4229  HG1 THR   271       -.040  47.532  30.984  1.00   .00      1SG 
ATOM   4230  CG2 THR   271       -.480  46.535  28.613  1.00 35.18      1SG 
ATOM   4231 HG21 THR   271       -.854  45.842  29.397  1.00   .00      1SG 
ATOM   4232 HG22 THR   271       -.087  45.933  27.766  1.00   .00      1SG 
ATOM   4233 HG23 THR   271      -1.326  47.165  28.264  1.00   .00      1SG 
ATOM   4234  C   THR   271       2.425  45.872  28.485  1.00 34.44      1SG 
ATOM   4235  O   THR   271       2.949  46.533  27.597  1.00 34.77      1SG 
ATOM   4236  N   LEU   272       2.418  44.545  28.480  1.00 30.72      1SG 
ATOM   4237  HN  LEU   272       2.033  44.002  29.222  1.00   .00      1SG 
ATOM   4238  CA  LEU   272       2.987  43.818  27.362  1.00 29.57      1SG 
ATOM   4239  HA  LEU   272       3.432  44.538  26.692  1.00   .00      1SG 
ATOM   4240  CB  LEU   272       4.044  42.806  27.827  1.00 28.49      1SG 
ATOM   4241  HB1 LEU   272       4.384  42.265  26.921  1.00   .00      1SG 
ATOM   4242  HB2 LEU   272       3.526  42.096  28.503  1.00   .00      1SG 
ATOM   4243  CG  LEU   272       5.304  43.265  28.559  1.00 30.90      1SG 
ATOM   4244  HG  LEU   272       5.169  43.161  29.657  1.00   .00      1SG 
ATOM   4245  CD1 LEU   272       6.468  42.365  28.076  1.00 29.69      1SG 
ATOM   4246 HD11 LEU   272       6.601  42.469  26.978  1.00   .00      1SG 
ATOM   4247 HD12 LEU   272       6.245  41.302  28.307  1.00   .00      1SG 
ATOM   4248 HD13 LEU   272       7.412  42.666  28.578  1.00   .00      1SG 
ATOM   4249  CD2 LEU   272       5.603  44.720  28.282  1.00 33.94      1SG 
ATOM   4250 HD21 LEU   272       4.846  45.366  28.776  1.00   .00      1SG 
ATOM   4251 HD22 LEU   272       5.572  44.911  27.188  1.00   .00      1SG 
ATOM   4252 HD23 LEU   272       6.607  44.982  28.679  1.00   .00      1SG 
ATOM   4253  C   LEU   272       1.858  43.066  26.678  1.00 24.64      1SG 
ATOM   4254  O   LEU   272        .909  42.660  27.327  1.00 29.11      1SG 
ATOM   4255  N   ARG   273       1.966  42.893  25.367  1.00 27.17      1SG 
ATOM   4256  HN  ARG   273       2.732  43.260  24.846  1.00   .00      1SG 
ATOM   4257  CA  ARG   273        .971  42.156  24.608  1.00 27.66      1SG 
ATOM   4258  HA  ARG   273        .386  41.576  25.307  1.00   .00      1SG 
ATOM   4259  CB  ARG   273        .066  43.087  23.816  1.00 33.16      1SG 
ATOM   4260  HB1 ARG   273       -.867  42.535  23.579  1.00   .00      1SG 
ATOM   4261  HB2 ARG   273        .585  43.343  22.869  1.00   .00      1SG 
ATOM   4262  CG  ARG   273       -.316  44.370  24.494  1.00 42.76      1SG 
ATOM   4263  HG1 ARG   273        .598  44.946  24.752  1.00   .00      1SG 
ATOM   4264  HG2 ARG   273       -.877  44.150  25.427  1.00   .00      1SG 
ATOM   4265  CD  ARG   273      -1.192  45.188  23.545  1.00 48.35      1SG 
ATOM   4266  HD1 ARG   273       -.696  45.288  22.556  1.00   .00      1SG 
ATOM   4267  HD2 ARG   273      -1.390  46.192  23.976  1.00   .00      1SG 
ATOM   4268  NE  ARG   273      -2.472  44.515  23.348  1.00 49.70      1SG 
ATOM   4269  HE  ARG   273      -2.502  43.723  22.738  1.00   .00      1SG 
ATOM   4270  CZ  ARG   273      -3.598  44.899  23.936  1.00 51.38      1SG 
ATOM   4271  NH1 ARG   273      -3.590  45.962  24.737  1.00 49.41      1SG 
ATOM   4272 HH11 ARG   273      -2.740  46.465  24.892  1.00   .00      1SG 
ATOM   4273 HH12 ARG   273      -4.434  46.258  25.184  1.00   .00      1SG 
ATOM   4274  NH2 ARG   273      -4.716  44.205  23.757  1.00 51.65      1SG 
ATOM   4275 HH21 ARG   273      -4.711  43.390  23.178  1.00   .00      1SG 
ATOM   4276 HH22 ARG   273      -5.563  44.497  24.202  1.00   .00      1SG 
ATOM   4277  C   ARG   273       1.758  41.342  23.606  1.00 30.19      1SG 
ATOM   4278  O   ARG   273       2.853  41.733  23.215  1.00 29.95      1SG 
ATOM   4279  N   TRP   274       1.206  40.222  23.172  1.00 27.02      1SG 
ATOM   4280  HN  TRP   274        .323  39.889  23.493  1.00   .00      1SG 
ATOM   4281  CA  TRP   274       1.901  39.412  22.174  1.00 24.06      1SG 
ATOM   4282  HA  TRP   274       2.954  39.414  22.415  1.00   .00      1SG 
ATOM   4283  CB  TRP   274       1.365  37.994  22.170  1.00 23.37      1SG 
ATOM   4284  HB1 TRP   274        .272  38.018  21.976  1.00   .00      1SG 
ATOM   4285  HB2 TRP   274       1.549  37.532  23.163  1.00   .00      1SG 
ATOM   4286  CG  TRP   274       2.019  37.157  21.124  1.00 25.57      1SG 
ATOM   4287  CD1 TRP   274       1.458  36.712  19.968  1.00 26.53      1SG 
ATOM   4288  HD1 TRP   274        .433  36.881  19.673  1.00   .00      1SG 
ATOM   4289  NE1 TRP   274       2.382  36.019  19.233  1.00 25.79      1SG 
ATOM   4290  HE1 TRP   274       2.220  35.606  18.364  1.00   .00      1SG 
ATOM   4291  CE2 TRP   274       3.570  35.999  19.913  1.00 28.75      1SG 
ATOM   4292  CD2 TRP   274       3.376  36.710  21.114  1.00 26.14      1SG 
ATOM   4293  CE3 TRP   274       4.452  36.843  22.009  1.00 24.57      1SG 
ATOM   4294  HE3 TRP   274       4.352  37.378  22.942  1.00   .00      1SG 
ATOM   4295  CZ3 TRP   274       5.674  36.264  21.671  1.00 22.36      1SG 
ATOM   4296  HZ3 TRP   274       6.511  36.359  22.347  1.00   .00      1SG 
ATOM   4297  CZ2 TRP   274       4.798  35.413  19.571  1.00 27.28      1SG 
ATOM   4298  HZ2 TRP   274       4.941  34.868  18.650  1.00   .00      1SG 
ATOM   4299  CH2 TRP   274       5.837  35.556  20.462  1.00 26.52      1SG 
ATOM   4300  HH2 TRP   274       6.796  35.117  20.231  1.00   .00      1SG 
ATOM   4301  C   TRP   274       1.635  40.062  20.819  1.00 27.88      1SG 
ATOM   4302  O   TRP   274        .568  39.864  20.218  1.00 24.75      1SG 
ATOM   4303  N   GLU   275       2.602  40.846  20.352  1.00 27.33      1SG 
ATOM   4304  HN  GLU   275       3.450  40.995  20.855  1.00   .00      1SG 
ATOM   4305  CA  GLU   275       2.488  41.541  19.073  1.00 28.44      1SG 
ATOM   4306  HA  GLU   275       2.015  40.873  18.369  1.00   .00      1SG 
ATOM   4307  CB  GLU   275       1.667  42.812  19.230  1.00 30.11      1SG 
ATOM   4308  HB1 GLU   275        .631  42.532  19.516  1.00   .00      1SG 
ATOM   4309  HB2 GLU   275       1.640  43.340  18.253  1.00   .00      1SG 
ATOM   4310  CG  GLU   275       2.219  43.758  20.276  1.00 40.37      1SG 
ATOM   4311  HG1 GLU   275       3.194  44.161  19.927  1.00   .00      1SG 
ATOM   4312  HG2 GLU   275       2.373  43.203  21.226  1.00   .00      1SG 
ATOM   4313  CD  GLU   275       1.280  44.915  20.536  1.00 47.43      1SG 
ATOM   4314  OE1 GLU   275        .101  44.818  20.116  1.00 48.00      1SG 
ATOM   4315  OE2 GLU   275       1.713  45.910  21.162  1.00 49.56      1SG 
ATOM   4316  C   GLU   275       3.861  41.920  18.570  1.00 29.85      1SG 
ATOM   4317  OT1 GLU   275       3.969  42.297  17.373  1.00   .00      1SG 
ATOM   4318  OT2 GLU   275       4.807  41.836  19.374  1.00 32.74      1SG 
ATOM   4319  N   MET     0       6.006  19.306  64.504  1.00 35.89      2SG 
ATOM   4320  HT1 MET     0       5.893  20.323  64.692  1.00   .00      2SG 
ATOM   4321  HT2 MET     0       6.525  18.864  65.289  1.00   .00      2SG 
ATOM   4322  HT3 MET     0       5.069  18.864  64.416  1.00   .00      2SG 
ATOM   4323  CA  MET     0       6.766  19.116  63.237  1.00 35.74      2SG 
ATOM   4324  HA  MET     0       7.654  19.729  63.287  1.00   .00      2SG 
ATOM   4325  CB  MET     0       7.140  17.644  63.059  1.00 33.58      2SG 
ATOM   4326  HB1 MET     0       6.224  17.075  62.794  1.00   .00      2SG 
ATOM   4327  HB2 MET     0       7.536  17.260  64.023  1.00   .00      2SG 
ATOM   4328  CG  MET     0       8.191  17.409  61.972  1.00 35.77      2SG 
ATOM   4329  HG1 MET     0       7.751  17.695  60.994  1.00   .00      2SG 
ATOM   4330  HG2 MET     0       8.427  16.325  61.944  1.00   .00      2SG 
ATOM   4331  SD  MET     0       9.762  18.373  62.244  1.00 39.81      2SG 
ATOM   4332  CE  MET     0      10.546  17.432  63.682  1.00 33.68      2SG 
ATOM   4333  HE1 MET     0      10.740  16.372  63.413  1.00   .00      2SG 
ATOM   4334  HE2 MET     0       9.869  17.444  64.563  1.00   .00      2SG 
ATOM   4335  HE3 MET     0      11.515  17.897  63.962  1.00   .00      2SG 
ATOM   4336  C   MET     0       5.996  19.593  61.998  1.00 35.33      2SG 
ATOM   4337  O   MET     0       4.756  19.579  61.968  1.00 39.45      2SG 
ATOM   4338  N   ILE     1       6.758  20.043  61.006  1.00 27.06      2SG 
ATOM   4339  HN  ILE     1       7.749  20.080  61.102  1.00   .00      2SG 
ATOM   4340  CA  ILE     1       6.248  20.518  59.708  1.00 32.07      2SG 
ATOM   4341  HA  ILE     1       5.238  20.153  59.594  1.00   .00      2SG 
ATOM   4342  CB  ILE     1       6.269  22.064  59.631  1.00 32.04      2SG 
ATOM   4343  HB  ILE     1       7.220  22.439  60.065  1.00   .00      2SG 
ATOM   4344  CG2 ILE     1       6.154  22.536  58.201  1.00 40.01      2SG 
ATOM   4345 HG21 ILE     1       5.299  22.033  57.700  1.00   .00      2SG 
ATOM   4346 HG22 ILE     1       7.085  22.291  57.646  1.00   .00      2SG 
ATOM   4347 HG23 ILE     1       5.982  23.633  58.178  1.00   .00      2SG 
ATOM   4348  CG1 ILE     1       5.141  22.640  60.484  1.00 38.88      2SG 
ATOM   4349 HG11 ILE     1       5.108  23.740  60.335  1.00   .00      2SG 
ATOM   4350 HG12 ILE     1       5.358  22.428  61.552  1.00   .00      2SG 
ATOM   4351  CD  ILE     1       3.797  22.067  60.143  1.00 37.50      2SG 
ATOM   4352  HD1 ILE     1       3.742  21.005  60.466  1.00   .00      2SG 
ATOM   4353  HD2 ILE     1       3.634  22.113  59.045  1.00   .00      2SG 
ATOM   4354  HD3 ILE     1       2.999  22.638  60.664  1.00   .00      2SG 
ATOM   4355  C   ILE     1       7.214  19.993  58.642  1.00 27.33      2SG 
ATOM   4356  O   ILE     1       8.417  19.943  58.873  1.00 28.23      2SG 
ATOM   4357  N   GLN     2       6.695  19.585  57.489  1.00 19.46      2SG 
ATOM   4358  HN  GLN     2       5.712  19.548  57.328  1.00   .00      2SG 
ATOM   4359  CA  GLN     2       7.549  19.165  56.388  1.00 17.20      2SG 
ATOM   4360  HA  GLN     2       8.555  19.488  56.612  1.00   .00      2SG 
ATOM   4361  CB  GLN     2       7.520  17.657  56.186  1.00 22.84      2SG 
ATOM   4362  HB1 GLN     2       7.993  17.413  55.211  1.00   .00      2SG 
ATOM   4363  HB2 GLN     2       6.464  17.314  56.169  1.00   .00      2SG 
ATOM   4364  CG  GLN     2       8.257  16.931  57.288  1.00 27.63      2SG 
ATOM   4365  HG1 GLN     2       8.509  17.659  58.088  1.00   .00      2SG 
ATOM   4366  HG2 GLN     2       9.195  16.507  56.871  1.00   .00      2SG 
ATOM   4367  CD  GLN     2       7.464  15.810  57.902  1.00 44.13      2SG 
ATOM   4368  OE1 GLN     2       6.277  15.964  58.197  1.00 42.79      2SG 
ATOM   4369  NE2 GLN     2       8.123  14.664  58.119  1.00 46.15      2SG 
ATOM   4370 HE21 GLN     2       7.648  13.883  58.525  1.00   .00      2SG 
ATOM   4371 HE22 GLN     2       9.090  14.589  57.875  1.00   .00      2SG 
ATOM   4372  C   GLN     2       6.986  19.871  55.167  1.00 18.05      2SG 
ATOM   4373  O   GLN     2       5.784  19.863  54.945  1.00 15.63      2SG 
ATOM   4374  N   ARG     3       7.856  20.534  54.418  1.00 11.20      2SG 
ATOM   4375  HN  ARG     3       8.826  20.583  54.645  1.00   .00      2SG 
ATOM   4376  CA  ARG     3       7.440  21.235  53.210  1.00 14.14      2SG 
ATOM   4377  HA  ARG     3       6.396  21.015  53.043  1.00   .00      2SG 
ATOM   4378  CB  ARG     3       7.647  22.753  53.343  1.00 14.73      2SG 
ATOM   4379  HB1 ARG     3       7.404  23.223  52.367  1.00   .00      2SG 
ATOM   4380  HB2 ARG     3       8.717  22.938  53.576  1.00   .00      2SG 
ATOM   4381  CG  ARG     3       6.802  23.426  54.419  1.00 13.73      2SG 
ATOM   4382  HG1 ARG     3       6.963  22.917  55.393  1.00   .00      2SG 
ATOM   4383  HG2 ARG     3       5.727  23.353  54.150  1.00   .00      2SG 
ATOM   4384  CD  ARG     3       7.208  24.911  54.536  1.00 15.73      2SG 
ATOM   4385  HD1 ARG     3       7.041  25.413  53.559  1.00   .00      2SG 
ATOM   4386  HD2 ARG     3       8.280  24.975  54.820  1.00   .00      2SG 
ATOM   4387  NE  ARG     3       6.444  25.664  55.549  1.00 17.15      2SG 
ATOM   4388  HE  ARG     3       6.872  25.803  56.441  1.00   .00      2SG 
ATOM   4389  CZ  ARG     3       5.225  26.173  55.365  1.00 18.58      2SG 
ATOM   4390  NH1 ARG     3       4.592  26.016  54.210  1.00 17.63      2SG 
ATOM   4391 HH11 ARG     3       4.957  25.390  53.521  1.00   .00      2SG 
ATOM   4392 HH12 ARG     3       3.750  26.523  54.029  1.00   .00      2SG 
ATOM   4393  NH2 ARG     3       4.661  26.895  56.329  1.00 17.75      2SG 
ATOM   4394 HH21 ARG     3       5.201  27.180  57.121  1.00   .00      2SG 
ATOM   4395 HH22 ARG     3       3.697  27.153  56.262  1.00   .00      2SG 
ATOM   4396  C   ARG     3       8.334  20.732  52.096  1.00 15.54      2SG 
ATOM   4397  O   ARG     3       9.560  20.678  52.246  1.00 13.20      2SG 
ATOM   4398  N   THR     4       7.734  20.375  50.973  1.00 13.69      2SG 
ATOM   4399  HN  THR     4       6.749  20.448  50.836  1.00   .00      2SG 
ATOM   4400  CA  THR     4       8.519  19.847  49.866  1.00 15.78      2SG 
ATOM   4401  HA  THR     4       9.358  19.304  50.276  1.00   .00      2SG 
ATOM   4402  CB  THR     4       7.635  18.905  48.986  1.00 22.63      2SG 
ATOM   4403  HB  THR     4       6.995  18.270  49.635  1.00   .00      2SG 
ATOM   4404  OG1 THR     4       8.483  18.059  48.192  1.00 30.46      2SG 
ATOM   4405  HG1 THR     4       8.770  17.351  48.774  1.00   .00      2SG 
ATOM   4406  CG2 THR     4       6.749  19.701  48.088  1.00 25.90      2SG 
ATOM   4407 HG21 THR     4       7.353  20.200  47.300  1.00   .00      2SG 
ATOM   4408 HG22 THR     4       6.218  20.480  48.675  1.00   .00      2SG 
ATOM   4409 HG23 THR     4       6.009  19.033  47.598  1.00   .00      2SG 
ATOM   4410  C   THR     4       9.134  20.994  49.043  1.00 14.08      2SG 
ATOM   4411  O   THR     4       8.534  22.035  48.853  1.00 15.32      2SG 
ATOM   4412  N   PRO     5      10.345  20.805  48.537  1.00 13.58      2SG 
ATOM   4413  CD  PRO     5      11.200  19.609  48.622  1.00 15.15      2SG 
ATOM   4414  HD1 PRO     5      10.637  18.710  48.296  1.00   .00      2SG 
ATOM   4415  HD2 PRO     5      11.567  19.471  49.661  1.00   .00      2SG 
ATOM   4416  CA  PRO     5      10.970  21.889  47.761  1.00 14.82      2SG 
ATOM   4417  HA  PRO     5      10.830  22.835  48.258  1.00   .00      2SG 
ATOM   4418  CB  PRO     5      12.420  21.446  47.637  1.00 16.70      2SG 
ATOM   4419  HB1 PRO     5      13.025  21.823  48.489  1.00   .00      2SG 
ATOM   4420  HB2 PRO     5      12.868  21.812  46.688  1.00   .00      2SG 
ATOM   4421  CG  PRO     5      12.346  19.947  47.653  1.00 19.74      2SG 
ATOM   4422  HG1 PRO     5      12.129  19.554  46.637  1.00   .00      2SG 
ATOM   4423  HG2 PRO     5      13.303  19.511  48.010  1.00   .00      2SG 
ATOM   4424  C   PRO     5      10.371  22.197  46.413  1.00 15.99      2SG 
ATOM   4425  O   PRO     5       9.913  21.293  45.728  1.00 14.71      2SG 
ATOM   4426  N   LYS     6      10.355  23.484  46.071  1.00 13.79      2SG 
ATOM   4427  HN  LYS     6      10.632  24.195  46.713  1.00   .00      2SG 
ATOM   4428  CA  LYS     6       9.942  23.955  44.763  1.00 16.05      2SG 
ATOM   4429  HA  LYS     6       9.216  23.258  44.373  1.00   .00      2SG 
ATOM   4430  CB  LYS     6       9.335  25.359  44.847  1.00 21.74      2SG 
ATOM   4431  HB1 LYS     6       9.067  25.689  43.821  1.00   .00      2SG 
ATOM   4432  HB2 LYS     6      10.101  26.050  45.258  1.00   .00      2SG 
ATOM   4433  CG  LYS     6       8.081  25.443  45.728  1.00 29.67      2SG 
ATOM   4434  HG1 LYS     6       8.366  25.266  46.787  1.00   .00      2SG 
ATOM   4435  HG2 LYS     6       7.360  24.658  45.414  1.00   .00      2SG 
ATOM   4436  CD  LYS     6       7.420  26.804  45.609  1.00 40.85      2SG 
ATOM   4437  HD1 LYS     6       6.818  26.834  44.676  1.00   .00      2SG 
ATOM   4438  HD2 LYS     6       8.207  27.585  45.554  1.00   .00      2SG 
ATOM   4439  CE  LYS     6       6.501  27.101  46.810  1.00 47.45      2SG 
ATOM   4440  HE1 LYS     6       5.833  27.954  46.565  1.00   .00      2SG 
ATOM   4441  HE2 LYS     6       7.120  27.344  47.700  1.00   .00      2SG 
ATOM   4442  NZ  LYS     6       5.633  25.937  47.169  1.00 48.24      2SG 
ATOM   4443  HZ1 LYS     6       6.230  25.122  47.417  1.00   .00      2SG 
ATOM   4444  HZ2 LYS     6       5.030  25.691  46.358  1.00   .00      2SG 
ATOM   4445  HZ3 LYS     6       5.035  26.188  47.982  1.00   .00      2SG 
ATOM   4446  C   LYS     6      11.328  24.032  44.106  1.00 15.50      2SG 
ATOM   4447  O   LYS     6      12.298  24.453  44.749  1.00 21.37      2SG 
ATOM   4448  N   ILE     7      11.434  23.629  42.851  1.00 12.44      2SG 
ATOM   4449  HN  ILE     7      10.651  23.348  42.302  1.00   .00      2SG 
ATOM   4450  CA  ILE     7      12.750  23.582  42.208  1.00 12.58      2SG 
ATOM   4451  HA  ILE     7      13.469  24.052  42.862  1.00   .00      2SG 
ATOM   4452  CB  ILE     7      13.122  22.104  41.954  1.00 15.36      2SG 
ATOM   4453  HB  ILE     7      12.333  21.627  41.335  1.00   .00      2SG 
ATOM   4454  CG2 ILE     7      14.451  22.006  41.235  1.00 19.04      2SG 
ATOM   4455 HG21 ILE     7      15.213  22.625  41.755  1.00   .00      2SG 
ATOM   4456 HG22 ILE     7      14.345  22.376  40.193  1.00   .00      2SG 
ATOM   4457 HG23 ILE     7      14.798  20.951  41.224  1.00   .00      2SG 
ATOM   4458  CG1 ILE     7      13.054  21.312  43.273  1.00 18.42      2SG 
ATOM   4459 HG11 ILE     7      12.167  21.648  43.852  1.00   .00      2SG 
ATOM   4460 HG12 ILE     7      13.970  21.519  43.867  1.00   .00      2SG 
ATOM   4461  CD  ILE     7      12.947  19.795  43.027  1.00 18.52      2SG 
ATOM   4462  HD1 ILE     7      13.832  19.437  42.459  1.00   .00      2SG 
ATOM   4463  HD2 ILE     7      12.032  19.571  42.437  1.00   .00      2SG 
ATOM   4464  HD3 ILE     7      12.907  19.256  43.998  1.00   .00      2SG 
ATOM   4465  C   ILE     7      12.699  24.266  40.840  1.00 14.00      2SG 
ATOM   4466  O   ILE     7      11.803  23.962  40.044  1.00 13.44      2SG 
ATOM   4467  N   GLN     8      13.625  25.185  40.583  1.00 10.44      2SG 
ATOM   4468  HN  GLN     8      14.303  25.456  41.261  1.00   .00      2SG 
ATOM   4469  CA  GLN     8      13.709  25.859  39.286  1.00 14.33      2SG 
ATOM   4470  HA  GLN     8      13.046  25.350  38.602  1.00   .00      2SG 
ATOM   4471  CB  GLN     8      13.314  27.326  39.412  1.00 14.29      2SG 
ATOM   4472  HB1 GLN     8      13.426  27.810  38.419  1.00   .00      2SG 
ATOM   4473  HB2 GLN     8      14.002  27.818  40.131  1.00   .00      2SG 
ATOM   4474  CG  GLN     8      11.872  27.531  39.896  1.00 10.78      2SG 
ATOM   4475  HG1 GLN     8      11.787  27.236  40.964  1.00   .00      2SG 
ATOM   4476  HG2 GLN     8      11.178  26.910  39.290  1.00   .00      2SG 
ATOM   4477  CD  GLN     8      11.505  28.976  39.748  1.00 18.13      2SG 
ATOM   4478  OE1 GLN     8      11.425  29.481  38.614  1.00 14.13      2SG 
ATOM   4479  NE2 GLN     8      11.307  29.668  40.867  1.00 15.59      2SG 
ATOM   4480 HE21 GLN     8      11.060  30.636  40.819  1.00   .00      2SG 
ATOM   4481 HE22 GLN     8      11.405  29.220  41.756  1.00   .00      2SG 
ATOM   4482  C   GLN     8      15.135  25.721  38.762  1.00 13.65      2SG 
ATOM   4483  O   GLN     8      16.107  25.869  39.525  1.00 12.70      2SG 
ATOM   4484  N   VAL     9      15.260  25.408  37.466  1.00  9.89      2SG 
ATOM   4485  HN  VAL     9      14.472  25.310  36.864  1.00   .00      2SG 
ATOM   4486  CA  VAL     9      16.569  25.191  36.858  1.00 10.55      2SG 
ATOM   4487  HA  VAL     9      17.322  25.385  37.608  1.00   .00      2SG 
ATOM   4488  CB  VAL     9      16.696  23.757  36.338  1.00 13.28      2SG 
ATOM   4489  HB  VAL     9      15.905  23.562  35.583  1.00   .00      2SG 
ATOM   4490  CG1 VAL     9      18.072  23.567  35.701  1.00 14.59      2SG 
ATOM   4491 HG11 VAL     9      18.869  23.755  36.451  1.00   .00      2SG 
ATOM   4492 HG12 VAL     9      18.201  24.281  34.860  1.00   .00      2SG 
ATOM   4493 HG13 VAL     9      18.175  22.526  35.327  1.00   .00      2SG 
ATOM   4494  CG2 VAL     9      16.471  22.745  37.475  1.00 12.19      2SG 
ATOM   4495 HG21 VAL     9      15.404  22.750  37.785  1.00   .00      2SG 
ATOM   4496 HG22 VAL     9      17.097  23.016  38.352  1.00   .00      2SG 
ATOM   4497 HG23 VAL     9      16.734  21.723  37.129  1.00   .00      2SG 
ATOM   4498  C   VAL     9      16.620  26.187  35.701  1.00 12.88      2SG 
ATOM   4499  O   VAL     9      15.742  26.176  34.822  1.00 14.79      2SG 
ATOM   4500  N   TYR    10      17.624  27.055  35.712  1.00 12.35      2SG 
ATOM   4501  HN  TYR    10      18.362  27.029  36.382  1.00   .00      2SG 
ATOM   4502  CA  TYR    10      17.674  28.114  34.698  1.00 15.00      2SG 
ATOM   4503  HA  TYR    10      17.427  27.686  33.738  1.00   .00      2SG 
ATOM   4504  CB  TYR    10      16.653  29.211  35.094  1.00 14.74      2SG 
ATOM   4505  HB1 TYR    10      15.625  28.795  35.036  1.00   .00      2SG 
ATOM   4506  HB2 TYR    10      16.755  30.075  34.403  1.00   .00      2SG 
ATOM   4507  CG  TYR    10      16.851  29.738  36.513  1.00 16.80      2SG 
ATOM   4508  CD1 TYR    10      16.459  28.977  37.640  1.00 11.92      2SG 
ATOM   4509  HD1 TYR    10      15.993  28.014  37.495  1.00   .00      2SG 
ATOM   4510  CE1 TYR    10      16.666  29.453  38.937  1.00 13.39      2SG 
ATOM   4511  HE1 TYR    10      16.342  28.864  39.782  1.00   .00      2SG 
ATOM   4512  CZ  TYR    10      17.283  30.675  39.147  1.00 17.14      2SG 
ATOM   4513  OH  TYR    10      17.479  31.123  40.455  1.00 13.06      2SG 
ATOM   4514  HH  TYR    10      18.050  31.894  40.422  1.00   .00      2SG 
ATOM   4515  CD2 TYR    10      17.459  30.975  36.739  1.00 13.76      2SG 
ATOM   4516  HD2 TYR    10      17.756  31.580  35.896  1.00   .00      2SG 
ATOM   4517  CE2 TYR    10      17.693  31.451  38.051  1.00 15.31      2SG 
ATOM   4518  HE2 TYR    10      18.182  32.401  38.208  1.00   .00      2SG 
ATOM   4519  C   TYR    10      19.042  28.749  34.609  1.00 15.59      2SG 
ATOM   4520  O   TYR    10      19.874  28.589  35.503  1.00 15.74      2SG 
ATOM   4521  N   SER    11      19.280  29.521  33.554  1.00 15.64      2SG 
ATOM   4522  HN  SER    11      18.628  29.683  32.818  1.00   .00      2SG 
ATOM   4523  CA  SER    11      20.587  30.171  33.477  1.00 13.93      2SG 
ATOM   4524  HA  SER    11      21.255  29.654  34.149  1.00   .00      2SG 
ATOM   4525  CB  SER    11      21.142  30.133  32.041  1.00 18.83      2SG 
ATOM   4526  HB1 SER    11      21.405  29.089  31.767  1.00   .00      2SG 
ATOM   4527  HB2 SER    11      22.047  30.773  31.971  1.00   .00      2SG 
ATOM   4528  OG  SER    11      20.175  30.611  31.135  1.00 17.39      2SG 
ATOM   4529  HG1 SER    11      20.417  31.521  30.945  1.00   .00      2SG 
ATOM   4530  C   SER    11      20.547  31.597  33.986  1.00 16.51      2SG 
ATOM   4531  O   SER    11      19.492  32.249  34.036  1.00 16.59      2SG 
ATOM   4532  N   ARG    12      21.710  32.074  34.396  1.00 16.87      2SG 
ATOM   4533  HN  ARG    12      22.553  31.542  34.365  1.00   .00      2SG 
ATOM   4534  CA  ARG    12      21.807  33.420  34.919  1.00 16.53      2SG 
ATOM   4535  HA  ARG    12      21.077  33.528  35.707  1.00   .00      2SG 
ATOM   4536  CB  ARG    12      23.201  33.675  35.451  1.00 13.33      2SG 
ATOM   4537  HB1 ARG    12      23.944  33.403  34.671  1.00   .00      2SG 
ATOM   4538  HB2 ARG    12      23.371  33.039  36.346  1.00   .00      2SG 
ATOM   4539  CG  ARG    12      23.398  35.178  35.845  1.00 15.47      2SG 
ATOM   4540  HG1 ARG    12      22.653  35.448  36.623  1.00   .00      2SG 
ATOM   4541  HG2 ARG    12      23.228  35.812  34.949  1.00   .00      2SG 
ATOM   4542  CD  ARG    12      24.806  35.450  36.388  1.00 18.78      2SG 
ATOM   4543  HD1 ARG    12      24.879  36.505  36.728  1.00   .00      2SG 
ATOM   4544  HD2 ARG    12      25.558  35.252  35.595  1.00   .00      2SG 
ATOM   4545  NE  ARG    12      25.125  34.596  37.524  1.00 18.96      2SG 
ATOM   4546  HE  ARG    12      24.447  33.922  37.814  1.00   .00      2SG 
ATOM   4547  CZ  ARG    12      26.270  34.666  38.195  1.00 24.87      2SG 
ATOM   4548  NH1 ARG    12      27.186  35.570  37.843  1.00 20.09      2SG 
ATOM   4549 HH11 ARG    12      26.955  36.285  37.183  1.00   .00      2SG 
ATOM   4550 HH12 ARG    12      28.103  35.533  38.239  1.00   .00      2SG 
ATOM   4551  NH2 ARG    12      26.530  33.802  39.176  1.00 17.87      2SG 
ATOM   4552 HH21 ARG    12      25.862  33.096  39.411  1.00   .00      2SG 
ATOM   4553 HH22 ARG    12      27.393  33.860  39.677  1.00   .00      2SG 
ATOM   4554  C   ARG    12      21.462  34.459  33.835  1.00 18.60      2SG 
ATOM   4555  O   ARG    12      20.679  35.394  34.087  1.00 16.91      2SG 
ATOM   4556  N   HSE    13      22.055  34.293  32.654  1.00 17.69      2SG 
ATOM   4557  HN  HSE    13      22.689  33.542  32.490  1.00   .00      2SG 
ATOM   4558  CA  HSE    13      21.827  35.190  31.511  1.00 20.29      2SG 
ATOM   4559  HA  HSE    13      21.209  36.010  31.844  1.00   .00      2SG 
ATOM   4560  CB  HSE    13      23.169  35.711  30.977  1.00 18.89      2SG 
ATOM   4561  HB1 HSE    13      22.972  36.417  30.142  1.00   .00      2SG 
ATOM   4562  HB2 HSE    13      23.760  34.851  30.596  1.00   .00      2SG 
ATOM   4563  ND1 HSE    13      23.600  37.631  32.558  1.00 23.52      2SG 
ATOM   4564  CG  HSE    13      23.985  36.422  32.012  1.00 20.46      2SG 
ATOM   4565  CE1 HSE    13      24.475  37.992  33.482  1.00 22.76      2SG 
ATOM   4566  HE1 HSE    13      24.449  38.893  34.094  1.00   .00      2SG 
ATOM   4567  NE2 HSE    13      25.416  37.064  33.553  1.00 21.47      2SG 
ATOM   4568  HE2 HSE    13      26.208  37.070  34.163  1.00   .00      2SG 
ATOM   4569  CD2 HSE    13      25.134  36.072  32.644  1.00 18.76      2SG 
ATOM   4570  HD2 HSE    13      25.755  35.196  32.505  1.00   .00      2SG 
ATOM   4571  C   HSE    13      21.155  34.383  30.428  1.00 22.61      2SG 
ATOM   4572  O   HSE    13      21.266  33.155  30.423  1.00 18.93      2SG 
ATOM   4573  N   PRO    14      20.428  35.043  29.491  1.00 24.13      2SG 
ATOM   4574  CD  PRO    14      19.971  36.441  29.420  1.00 25.21      2SG 
ATOM   4575  HD1 PRO    14      20.764  37.126  29.785  1.00   .00      2SG 
ATOM   4576  HD2 PRO    14      19.047  36.577  30.019  1.00   .00      2SG 
ATOM   4577  CA  PRO    14      19.806  34.221  28.446  1.00 23.85      2SG 
ATOM   4578  HA  PRO    14      19.121  33.514  28.885  1.00   .00      2SG 
ATOM   4579  CB  PRO    14      19.146  35.260  27.505  1.00 25.93      2SG 
ATOM   4580  HB1 PRO    14      18.040  35.243  27.612  1.00   .00      2SG 
ATOM   4581  HB2 PRO    14      19.407  35.054  26.445  1.00   .00      2SG 
ATOM   4582  CG  PRO    14      19.716  36.613  27.954  1.00 31.29      2SG 
ATOM   4583  HG1 PRO    14      20.658  36.845  27.413  1.00   .00      2SG 
ATOM   4584  HG2 PRO    14      18.986  37.430  27.772  1.00   .00      2SG 
ATOM   4585  C   PRO    14      20.910  33.348  27.799  1.00 23.54      2SG 
ATOM   4586  O   PRO    14      22.028  33.803  27.560  1.00 19.87      2SG 
ATOM   4587  N   ALA    15      20.592  32.086  27.545  1.00 20.24      2SG 
ATOM   4588  HN  ALA    15      19.668  31.736  27.677  1.00   .00      2SG 
ATOM   4589  CA  ALA    15      21.574  31.132  27.056  1.00 25.09      2SG 
ATOM   4590  HA  ALA    15      22.525  31.353  27.518  1.00   .00      2SG 
ATOM   4591  CB  ALA    15      21.125  29.738  27.405  1.00 26.81      2SG 
ATOM   4592  HB1 ALA    15      20.141  29.525  26.936  1.00   .00      2SG 
ATOM   4593  HB2 ALA    15      21.022  29.639  28.507  1.00   .00      2SG 
ATOM   4594  HB3 ALA    15      21.864  28.998  27.030  1.00   .00      2SG 
ATOM   4595  C   ALA    15      21.887  31.214  25.568  1.00 26.15      2SG 
ATOM   4596  O   ALA    15      20.991  31.268  24.738  1.00 26.71      2SG 
ATOM   4597  N   GLU    16      23.173  31.235  25.260  1.00 24.38      2SG 
ATOM   4598  HN  GLU    16      23.880  31.203  25.962  1.00   .00      2SG 
ATOM   4599  CA  GLU    16      23.650  31.305  23.887  1.00 25.44      2SG 
ATOM   4600  HA  GLU    16      22.810  31.131  23.230  1.00   .00      2SG 
ATOM   4601  CB  GLU    16      24.268  32.672  23.609  1.00 28.15      2SG 
ATOM   4602  HB1 GLU    16      25.152  32.809  24.267  1.00   .00      2SG 
ATOM   4603  HB2 GLU    16      23.521  33.460  23.842  1.00   .00      2SG 
ATOM   4604  CG  GLU    16      24.704  32.818  22.159  1.00 41.94      2SG 
ATOM   4605  HG1 GLU    16      23.816  32.695  21.503  1.00   .00      2SG 
ATOM   4606  HG2 GLU    16      25.444  32.024  21.924  1.00   .00      2SG 
ATOM   4607  CD  GLU    16      25.333  34.158  21.865  1.00 48.16      2SG 
ATOM   4608  OE1 GLU    16      24.911  35.162  22.488  1.00 51.29      2SG 
ATOM   4609  OE2 GLU    16      26.239  34.204  20.995  1.00 54.53      2SG 
ATOM   4610  C   GLU    16      24.721  30.249  23.778  1.00 21.82      2SG 
ATOM   4611  O   GLU    16      25.721  30.318  24.507  1.00 23.06      2SG 
ATOM   4612  N   ASN    17      24.546  29.271  22.889  1.00 24.38      2SG 
ATOM   4613  HN  ASN    17      23.751  29.209  22.291  1.00   .00      2SG 
ATOM   4614  CA  ASN    17      25.558  28.228  22.769  1.00 28.10      2SG 
ATOM   4615  HA  ASN    17      25.636  27.727  23.723  1.00   .00      2SG 
ATOM   4616  CB  ASN    17      25.183  27.231  21.678  1.00 29.95      2SG 
ATOM   4617  HB1 ASN    17      26.032  26.534  21.513  1.00   .00      2SG 
ATOM   4618  HB2 ASN    17      24.976  27.782  20.736  1.00   .00      2SG 
ATOM   4619  CG  ASN    17      23.969  26.431  22.044  1.00 35.59      2SG 
ATOM   4620  OD1 ASN    17      23.757  26.130  23.222  1.00 30.39      2SG 
ATOM   4621  ND2 ASN    17      23.162  26.066  21.046  1.00 32.30      2SG 
ATOM   4622 HD21 ASN    17      22.426  25.410  21.213  1.00   .00      2SG 
ATOM   4623 HD22 ASN    17      23.294  26.448  20.131  1.00   .00      2SG 
ATOM   4624  C   ASN    17      26.924  28.837  22.501  1.00 29.00      2SG 
ATOM   4625  O   ASN    17      27.047  29.799  21.743  1.00 29.41      2SG 
ATOM   4626  N   GLY    18      27.943  28.307  23.171  1.00 28.93      2SG 
ATOM   4627  HN  GLY    18      27.833  27.554  23.815  1.00   .00      2SG 
ATOM   4628  CA  GLY    18      29.286  28.818  22.984  1.00 29.36      2SG 
ATOM   4629  HA1 GLY    18      29.373  29.126  21.953  1.00   .00      2SG 
ATOM   4630  HA2 GLY    18      29.970  28.008  23.190  1.00   .00      2SG 
ATOM   4631  C   GLY    18      29.649  29.991  23.869  1.00 29.25      2SG 
ATOM   4632  O   GLY    18      30.783  30.441  23.841  1.00 29.28      2SG 
ATOM   4633  N   LYS    19      28.706  30.497  24.665  1.00 25.95      2SG 
ATOM   4634  HN  LYS    19      27.778  30.135  24.702  1.00   .00      2SG 
ATOM   4635  CA  LYS    19      29.008  31.629  25.533  1.00 24.13      2SG 
ATOM   4636  HA  LYS    19      30.023  31.943  25.341  1.00   .00      2SG 
ATOM   4637  CB  LYS    19      28.027  32.770  25.245  1.00 28.62      2SG 
ATOM   4638  HB1 LYS    19      28.152  33.560  26.016  1.00   .00      2SG 
ATOM   4639  HB2 LYS    19      26.989  32.379  25.297  1.00   .00      2SG 
ATOM   4640  CG  LYS    19      28.266  33.383  23.850  1.00 37.49      2SG 
ATOM   4641  HG1 LYS    19      27.613  32.868  23.113  1.00   .00      2SG 
ATOM   4642  HG2 LYS    19      29.327  33.223  23.563  1.00   .00      2SG 
ATOM   4643  CD  LYS    19      27.965  34.874  23.819  1.00 47.55      2SG 
ATOM   4644  HD1 LYS    19      28.503  35.369  24.655  1.00   .00      2SG 
ATOM   4645  HD2 LYS    19      26.873  35.025  23.955  1.00   .00      2SG 
ATOM   4646  CE  LYS    19      28.398  35.521  22.492  1.00 49.69      2SG 
ATOM   4647  HE1 LYS    19      27.791  35.106  21.659  1.00   .00      2SG 
ATOM   4648  HE2 LYS    19      29.477  35.323  22.315  1.00   .00      2SG 
ATOM   4649  NZ  LYS    19      28.204  37.013  22.497  1.00 46.53      2SG 
ATOM   4650  HZ1 LYS    19      28.770  37.434  23.261  1.00   .00      2SG 
ATOM   4651  HZ2 LYS    19      27.199  37.231  22.650  1.00   .00      2SG 
ATOM   4652  HZ3 LYS    19      28.509  37.405  21.583  1.00   .00      2SG 
ATOM   4653  C   LYS    19      28.974  31.249  27.008  1.00 23.47      2SG 
ATOM   4654  O   LYS    19      27.999  30.645  27.453  1.00 21.68      2SG 
ATOM   4655  N   SER    20      30.021  31.590  27.760  1.00 23.02      2SG 
ATOM   4656  HN  SER    20      30.809  32.082  27.398  1.00   .00      2SG 
ATOM   4657  CA  SER    20      30.054  31.242  29.195  1.00 23.67      2SG 
ATOM   4658  HA  SER    20      29.948  30.171  29.277  1.00   .00      2SG 
ATOM   4659  CB  SER    20      31.364  31.695  29.857  1.00 25.17      2SG 
ATOM   4660  HB1 SER    20      32.218  31.424  29.200  1.00   .00      2SG 
ATOM   4661  HB2 SER    20      31.474  31.183  30.837  1.00   .00      2SG 
ATOM   4662  OG  SER    20      31.402  33.090  30.080  1.00 37.22      2SG 
ATOM   4663  HG1 SER    20      31.949  33.219  30.859  1.00   .00      2SG 
ATOM   4664  C   SER    20      28.848  31.851  29.912  1.00 21.73      2SG 
ATOM   4665  O   SER    20      28.390  32.933  29.559  1.00 19.07      2SG 
ATOM   4666  N   ASN    21      28.343  31.143  30.925  1.00 21.91      2SG 
ATOM   4667  HN  ASN    21      28.761  30.293  31.236  1.00   .00      2SG 
ATOM   4668  CA  ASN    21      27.132  31.573  31.652  1.00 19.39      2SG 
ATOM   4669  HA  ASN    21      27.120  32.652  31.701  1.00   .00      2SG 
ATOM   4670  CB  ASN    21      25.910  31.040  30.878  1.00 17.68      2SG 
ATOM   4671  HB1 ASN    21      25.694  30.008  31.227  1.00   .00      2SG 
ATOM   4672  HB2 ASN    21      26.161  31.014  29.797  1.00   .00      2SG 
ATOM   4673  CG  ASN    21      24.639  31.875  31.050  1.00 16.98      2SG 
ATOM   4674  OD1 ASN    21      24.308  32.344  32.132  1.00 16.98      2SG 
ATOM   4675  ND2 ASN    21      23.889  32.022  29.942  1.00 18.34      2SG 
ATOM   4676 HD21 ASN    21      22.975  32.423  30.006  1.00   .00      2SG 
ATOM   4677 HD22 ASN    21      24.245  31.730  29.055  1.00   .00      2SG 
ATOM   4678  C   ASN    21      27.196  30.823  32.988  1.00 18.84      2SG 
ATOM   4679  O   ASN    21      28.219  30.215  33.336  1.00 17.54      2SG 
ATOM   4680  N   PHE    22      26.097  30.868  33.726  1.00 15.09      2SG 
ATOM   4681  HN  PHE    22      25.301  31.409  33.464  1.00   .00      2SG 
ATOM   4682  CA  PHE    22      25.989  30.125  34.970  1.00 12.30      2SG 
ATOM   4683  HA  PHE    22      26.832  29.452  35.025  1.00   .00      2SG 
ATOM   4684  CB  PHE    22      25.977  31.054  36.196  1.00 15.82      2SG 
ATOM   4685  HB1 PHE    22      25.534  30.517  37.061  1.00   .00      2SG 
ATOM   4686  HB2 PHE    22      25.381  31.962  35.964  1.00   .00      2SG 
ATOM   4687  CG  PHE    22      27.338  31.507  36.603  1.00 19.42      2SG 
ATOM   4688  CD1 PHE    22      27.949  32.592  35.963  1.00 19.63      2SG 
ATOM   4689  HD1 PHE    22      27.422  33.116  35.179  1.00   .00      2SG 
ATOM   4690  CE1 PHE    22      29.236  33.004  36.329  1.00 24.09      2SG 
ATOM   4691  HE1 PHE    22      29.698  33.843  35.829  1.00   .00      2SG 
ATOM   4692  CZ  PHE    22      29.924  32.328  37.343  1.00 23.24      2SG 
ATOM   4693  HZ  PHE    22      30.916  32.645  37.628  1.00   .00      2SG 
ATOM   4694  CD2 PHE    22      28.029  30.830  37.617  1.00 20.43      2SG 
ATOM   4695  HD2 PHE    22      27.564  29.991  38.114  1.00   .00      2SG 
ATOM   4696  CE2 PHE    22      29.319  31.233  37.991  1.00 27.59      2SG 
ATOM   4697  HE2 PHE    22      29.846  30.706  38.772  1.00   .00      2SG 
ATOM   4698  C   PHE    22      24.662  29.383  34.913  1.00 16.65      2SG 
ATOM   4699  O   PHE    22      23.648  29.952  34.486  1.00 13.91      2SG 
ATOM   4700  N   LEU    23      24.680  28.130  35.367  1.00 13.73      2SG 
ATOM   4701  HN  LEU    23      25.523  27.702  35.683  1.00   .00      2SG 
ATOM   4702  CA  LEU    23      23.484  27.294  35.437  1.00 13.43      2SG 
ATOM   4703  HA  LEU    23      22.729  27.737  34.804  1.00   .00      2SG 
ATOM   4704  CB  LEU    23      23.791  25.872  34.978  1.00 16.43      2SG 
ATOM   4705  HB1 LEU    23      24.648  25.489  35.571  1.00   .00      2SG 
ATOM   4706  HB2 LEU    23      24.081  25.904  33.907  1.00   .00      2SG 
ATOM   4707  CG  LEU    23      22.616  24.892  35.134  1.00 16.83      2SG 
ATOM   4708  HG  LEU    23      22.285  24.879  36.194  1.00   .00      2SG 
ATOM   4709  CD1 LEU    23      21.459  25.309  34.251  1.00 21.81      2SG 
ATOM   4710 HD11 LEU    23      21.775  25.318  33.186  1.00   .00      2SG 
ATOM   4711 HD12 LEU    23      21.120  26.330  34.529  1.00   .00      2SG 
ATOM   4712 HD13 LEU    23      20.618  24.592  34.365  1.00   .00      2SG 
ATOM   4713  CD2 LEU    23      23.092  23.492  34.785  1.00 23.87      2SG 
ATOM   4714 HD21 LEU    23      23.918  23.189  35.463  1.00   .00      2SG 
ATOM   4715 HD22 LEU    23      23.466  23.469  33.739  1.00   .00      2SG 
ATOM   4716 HD23 LEU    23      22.256  22.769  34.899  1.00   .00      2SG 
ATOM   4717  C   LEU    23      23.079  27.279  36.909  1.00 13.94      2SG 
ATOM   4718  O   LEU    23      23.900  26.980  37.790  1.00 12.67      2SG 
ATOM   4719  N   ASN    24      21.808  27.578  37.157  1.00 14.70      2SG 
ATOM   4720  HN  ASN    24      21.156  27.746  36.422  1.00   .00      2SG 
ATOM   4721  CA  ASN    24      21.272  27.683  38.523  1.00 12.98      2SG 
ATOM   4722  HA  ASN    24      22.095  27.571  39.213  1.00   .00      2SG 
ATOM   4723  CB  ASN    24      20.573  29.042  38.743  1.00 14.51      2SG 
ATOM   4724  HB1 ASN    24      20.120  29.050  39.757  1.00   .00      2SG 
ATOM   4725  HB2 ASN    24      19.771  29.158  37.984  1.00   .00      2SG 
ATOM   4726  CG  ASN    24      21.508  30.229  38.631  1.00 21.19      2SG 
ATOM   4727  OD1 ASN    24      22.657  30.175  39.056  1.00 21.36      2SG 
ATOM   4728  ND2 ASN    24      21.004  31.317  38.072  1.00 15.29      2SG 
ATOM   4729 HD21 ASN    24      21.514  32.177  38.102  1.00   .00      2SG 
ATOM   4730 HD22 ASN    24      20.113  31.280  37.619  1.00   .00      2SG 
ATOM   4731  C   ASN    24      20.204  26.643  38.834  1.00 13.93      2SG 
ATOM   4732  O   ASN    24      19.413  26.256  37.969  1.00 12.04      2SG 
ATOM   4733  N   CYS    25      20.213  26.184  40.080  1.00 10.66      2SG 
ATOM   4734  HN  CYS    25      20.924  26.427  40.735  1.00   .00      2SG 
ATOM   4735  CA  CYS    25      19.175  25.296  40.555  1.00 14.52      2SG 
ATOM   4736  HA  CYS    25      18.411  25.254  39.793  1.00   .00      2SG 
ATOM   4737  CB  CYS    25      19.682  23.897  40.850  1.00 17.38      2SG 
ATOM   4738  HB1 CYS    25      20.472  23.951  41.629  1.00   .00      2SG 
ATOM   4739  HB2 CYS    25      20.131  23.469  39.929  1.00   .00      2SG 
ATOM   4740  SG  CYS    25      18.303  22.844  41.425  1.00 18.46      2SG 
ATOM   4741  HG1 CYS    25      18.318  23.303  42.668  1.00   .00      2SG 
ATOM   4742  C   CYS    25      18.751  25.975  41.859  1.00 11.84      2SG 
ATOM   4743  O   CYS    25      19.481  25.966  42.857  1.00 13.84      2SG 
ATOM   4744  N   TYR    26      17.567  26.560  41.841  1.00 10.92      2SG 
ATOM   4745  HN  TYR    26      16.978  26.542  41.037  1.00   .00      2SG 
ATOM   4746  CA  TYR    26      17.052  27.267  42.997  1.00 10.94      2SG 
ATOM   4747  HA  TYR    26      17.869  27.455  43.678  1.00   .00      2SG 
ATOM   4748  CB  TYR    26      16.430  28.568  42.529  1.00 12.16      2SG 
ATOM   4749  HB1 TYR    26      15.597  28.346  41.828  1.00   .00      2SG 
ATOM   4750  HB2 TYR    26      17.203  29.183  42.021  1.00   .00      2SG 
ATOM   4751  CG  TYR    26      15.860  29.402  43.659  1.00 15.25      2SG 
ATOM   4752  CD1 TYR    26      16.676  29.886  44.688  1.00 14.77      2SG 
ATOM   4753  HD1 TYR    26      17.727  29.636  44.700  1.00   .00      2SG 
ATOM   4754  CE1 TYR    26      16.146  30.688  45.698  1.00 14.45      2SG 
ATOM   4755  HE1 TYR    26      16.786  31.061  46.484  1.00   .00      2SG 
ATOM   4756  CZ  TYR    26      14.803  31.005  45.693  1.00 17.64      2SG 
ATOM   4757  OH  TYR    26      14.261  31.757  46.724  1.00 17.93      2SG 
ATOM   4758  HH  TYR    26      13.306  31.740  46.633  1.00   .00      2SG 
ATOM   4759  CD2 TYR    26      14.518  29.738  43.676  1.00 15.12      2SG 
ATOM   4760  HD2 TYR    26      13.868  29.373  42.895  1.00   .00      2SG 
ATOM   4761  CE2 TYR    26      13.990  30.546  44.694  1.00 15.57      2SG 
ATOM   4762  HE2 TYR    26      12.942  30.805  44.689  1.00   .00      2SG 
ATOM   4763  C   TYR    26      16.015  26.382  43.672  1.00 10.72      2SG 
ATOM   4764  O   TYR    26      15.032  25.968  43.046  1.00 13.06      2SG 
ATOM   4765  N   VAL    27      16.267  26.049  44.932  1.00 10.10      2SG 
ATOM   4766  HN  VAL    27      17.080  26.362  45.417  1.00   .00      2SG 
ATOM   4767  CA  VAL    27      15.349  25.193  45.681  1.00 11.91      2SG 
ATOM   4768  HA  VAL    27      14.540  24.915  45.022  1.00   .00      2SG 
ATOM   4769  CB  VAL    27      16.066  23.940  46.199  1.00 19.00      2SG 
ATOM   4770  HB  VAL    27      15.354  23.308  46.772  1.00   .00      2SG 
ATOM   4771  CG1 VAL    27      16.609  23.156  45.006  1.00 22.83      2SG 
ATOM   4772 HG11 VAL    27      17.452  23.708  44.538  1.00   .00      2SG 
ATOM   4773 HG12 VAL    27      15.809  23.020  44.247  1.00   .00      2SG 
ATOM   4774 HG13 VAL    27      16.978  22.164  45.342  1.00   .00      2SG 
ATOM   4775  CG2 VAL    27      17.221  24.320  47.063  1.00 20.93      2SG 
ATOM   4776 HG21 VAL    27      16.856  24.753  48.019  1.00   .00      2SG 
ATOM   4777 HG22 VAL    27      17.846  25.079  46.546  1.00   .00      2SG 
ATOM   4778 HG23 VAL    27      17.834  23.422  47.291  1.00   .00      2SG 
ATOM   4779  C   VAL    27      14.797  26.030  46.813  1.00 11.95      2SG 
ATOM   4780  O   VAL    27      15.558  26.633  47.600  1.00 12.98      2SG 
ATOM   4781  N   SER    28      13.473  26.111  46.886  1.00 11.38      2SG 
ATOM   4782  HN  SER    28      12.858  25.617  46.276  1.00   .00      2SG 
ATOM   4783  CA  SER    28      12.864  26.968  47.912  1.00 13.14      2SG 
ATOM   4784  HA  SER    28      13.585  27.113  48.703  1.00   .00      2SG 
ATOM   4785  CB  SER    28      12.462  28.320  47.295  1.00 14.38      2SG 
ATOM   4786  HB1 SER    28      13.360  28.820  46.873  1.00   .00      2SG 
ATOM   4787  HB2 SER    28      12.011  28.968  48.077  1.00   .00      2SG 
ATOM   4788  OG  SER    28      11.507  28.131  46.247  1.00 18.43      2SG 
ATOM   4789  HG1 SER    28      10.965  28.923  46.237  1.00   .00      2SG 
ATOM   4790  C   SER    28      11.620  26.373  48.519  1.00 16.00      2SG 
ATOM   4791  O   SER    28      11.093  25.374  48.036  1.00 14.44      2SG 
ATOM   4792  N   GLY    29      11.165  27.002  49.594  1.00 12.66      2SG 
ATOM   4793  HN  GLY    29      11.622  27.792  49.996  1.00   .00      2SG 
ATOM   4794  CA  GLY    29       9.943  26.542  50.241  1.00 15.18      2SG 
ATOM   4795  HA1 GLY    29       9.187  26.459  49.474  1.00   .00      2SG 
ATOM   4796  HA2 GLY    29       9.661  27.294  50.962  1.00   .00      2SG 
ATOM   4797  C   GLY    29      10.047  25.211  50.955  1.00 15.83      2SG 
ATOM   4798  O   GLY    29       9.020  24.580  51.210  1.00 16.40      2SG 
ATOM   4799  N   PHE    30      11.251  24.773  51.318  1.00 13.25      2SG 
ATOM   4800  HN  PHE    30      12.097  25.278  51.164  1.00   .00      2SG 
ATOM   4801  CA  PHE    30      11.340  23.480  51.980  1.00 14.74      2SG 
ATOM   4802  HA  PHE    30      10.366  23.016  51.941  1.00   .00      2SG 
ATOM   4803  CB  PHE    30      12.385  22.590  51.286  1.00 14.89      2SG 
ATOM   4804  HB1 PHE    30      12.100  22.463  50.220  1.00   .00      2SG 
ATOM   4805  HB2 PHE    30      12.414  21.603  51.794  1.00   .00      2SG 
ATOM   4806  CG  PHE    30      13.805  23.140  51.304  1.00  9.87      2SG 
ATOM   4807  CD1 PHE    30      14.213  24.089  50.368  1.00 13.75      2SG 
ATOM   4808  HD1 PHE    30      13.513  24.454  49.630  1.00   .00      2SG 
ATOM   4809  CE1 PHE    30      15.543  24.576  50.382  1.00 12.50      2SG 
ATOM   4810  HE1 PHE    30      15.856  25.311  49.656  1.00   .00      2SG 
ATOM   4811  CZ  PHE    30      16.457  24.103  51.341  1.00 11.84      2SG 
ATOM   4812  HZ  PHE    30      17.471  24.476  51.354  1.00   .00      2SG 
ATOM   4813  CD2 PHE    30      14.740  22.680  52.254  1.00 11.17      2SG 
ATOM   4814  HD2 PHE    30      14.431  21.945  52.982  1.00   .00      2SG 
ATOM   4815  CE2 PHE    30      16.048  23.148  52.278  1.00 12.73      2SG 
ATOM   4816  HE2 PHE    30      16.745  22.777  53.015  1.00   .00      2SG 
ATOM   4817  C   PHE    30      11.621  23.509  53.471  1.00 12.41      2SG 
ATOM   4818  O   PHE    30      12.065  24.512  54.006  1.00 12.39      2SG 
ATOM   4819  N   HSE    31      11.309  22.396  54.137  1.00 11.71      2SG 
ATOM   4820  HN  HSE    31      10.898  21.608  53.687  1.00   .00      2SG 
ATOM   4821  CA  HSE    31      11.554  22.260  55.589  1.00 10.10      2SG 
ATOM   4822  HA  HSE    31      12.543  22.641  55.796  1.00   .00      2SG 
ATOM   4823  CB  HSE    31      10.502  23.038  56.404  1.00 13.24      2SG 
ATOM   4824  HB1 HSE    31       9.689  22.340  56.696  1.00   .00      2SG 
ATOM   4825  HB2 HSE    31      10.080  23.843  55.766  1.00   .00      2SG 
ATOM   4826  ND1 HSE    31      11.461  22.926  58.739  1.00 16.95      2SG 
ATOM   4827  CG  HSE    31      11.054  23.664  57.648  1.00 15.84      2SG 
ATOM   4828  CE1 HSE    31      11.993  23.736  59.643  1.00 15.66      2SG 
ATOM   4829  HE1 HSE    31      12.414  23.456  60.608  1.00   .00      2SG 
ATOM   4830  NE2 HSE    31      11.933  24.975  59.181  1.00 19.58      2SG 
ATOM   4831  HE2 HSE    31      12.260  25.797  59.647  1.00   .00      2SG 
ATOM   4832  CD2 HSE    31      11.340  24.959  57.938  1.00 16.88      2SG 
ATOM   4833  HD2 HSE    31      11.162  25.851  57.350  1.00   .00      2SG 
ATOM   4834  C   HSE    31      11.415  20.759  55.859  1.00 12.03      2SG 
ATOM   4835  O   HSE    31      10.488  20.110  55.339  1.00 13.27      2SG 
ATOM   4836  N   PRO    32      12.343  20.164  56.625  1.00 12.32      2SG 
ATOM   4837  CD  PRO    32      12.297  18.712  56.866  1.00 16.91      2SG 
ATOM   4838  HD1 PRO    32      12.156  18.167  55.909  1.00   .00      2SG 
ATOM   4839  HD2 PRO    32      11.475  18.464  57.569  1.00   .00      2SG 
ATOM   4840  CA  PRO    32      13.512  20.758  57.265  1.00 15.00      2SG 
ATOM   4841  HA  PRO    32      13.264  21.719  57.686  1.00   .00      2SG 
ATOM   4842  CB  PRO    32      13.925  19.696  58.289  1.00 17.93      2SG 
ATOM   4843  HB1 PRO    32      13.287  19.730  59.197  1.00   .00      2SG 
ATOM   4844  HB2 PRO    32      14.988  19.807  58.591  1.00   .00      2SG 
ATOM   4845  CG  PRO    32      13.698  18.431  57.492  1.00 20.53      2SG 
ATOM   4846  HG1 PRO    32      14.475  18.294  56.711  1.00   .00      2SG 
ATOM   4847  HG2 PRO    32      13.682  17.533  58.145  1.00   .00      2SG 
ATOM   4848  C   PRO    32      14.613  21.109  56.277  1.00 14.87      2SG 
ATOM   4849  O   PRO    32      14.476  20.906  55.050  1.00 14.36      2SG 
ATOM   4850  N   SER    33      15.735  21.597  56.807  1.00 12.42      2SG 
ATOM   4851  HN  SER    33      15.907  21.635  57.788  1.00   .00      2SG 
ATOM   4852  CA  SER    33      16.774  22.105  55.925  1.00 13.84      2SG 
ATOM   4853  HA  SER    33      16.304  22.581  55.077  1.00   .00      2SG 
ATOM   4854  CB  SER    33      17.634  23.113  56.711  1.00 16.92      2SG 
ATOM   4855  HB1 SER    33      16.992  23.919  57.127  1.00   .00      2SG 
ATOM   4856  HB2 SER    33      18.403  23.559  56.045  1.00   .00      2SG 
ATOM   4857  OG  SER    33      18.276  22.438  57.772  1.00 16.00      2SG 
ATOM   4858  HG1 SER    33      18.934  21.870  57.365  1.00   .00      2SG 
ATOM   4859  C   SER    33      17.669  21.080  55.243  1.00 16.14      2SG 
ATOM   4860  O   SER    33      18.341  21.415  54.253  1.00 15.32      2SG 
ATOM   4861  N   ASP    34      17.711  19.856  55.774  1.00 17.38      2SG 
ATOM   4862  HN  ASP    34      17.180  19.594  56.576  1.00   .00      2SG 
ATOM   4863  CA  ASP    34      18.575  18.814  55.170  1.00 19.68      2SG 
ATOM   4864  HA  ASP    34      19.587  19.190  55.137  1.00   .00      2SG 
ATOM   4865  CB  ASP    34      18.504  17.536  56.007  1.00 24.31      2SG 
ATOM   4866  HB1 ASP    34      17.473  17.127  55.953  1.00   .00      2SG 
ATOM   4867  HB2 ASP    34      18.743  17.784  57.063  1.00   .00      2SG 
ATOM   4868  CG  ASP    34      19.466  16.469  55.537  1.00 37.42      2SG 
ATOM   4869  OD1 ASP    34      20.515  16.805  54.933  1.00 41.48      2SG 
ATOM   4870  OD2 ASP    34      19.175  15.280  55.796  1.00 46.25      2SG 
ATOM   4871  C   ASP    34      18.064  18.535  53.742  1.00 16.69      2SG 
ATOM   4872  O   ASP    34      16.942  18.114  53.560  1.00 17.13      2SG 
ATOM   4873  N   ILE    35      18.911  18.743  52.744  1.00 15.22      2SG 
ATOM   4874  HN  ILE    35      19.854  19.032  52.892  1.00   .00      2SG 
ATOM   4875  CA  ILE    35      18.494  18.554  51.353  1.00 12.21      2SG 
ATOM   4876  HA  ILE    35      17.792  17.734  51.317  1.00   .00      2SG 
ATOM   4877  CB  ILE    35      17.840  19.855  50.831  1.00 14.76      2SG 
ATOM   4878  HB  ILE    35      17.039  20.179  51.529  1.00   .00      2SG 
ATOM   4879  CG2 ILE    35      18.910  20.944  50.731  1.00 19.67      2SG 
ATOM   4880 HG21 ILE    35      19.614  20.712  49.904  1.00   .00      2SG 
ATOM   4881 HG22 ILE    35      19.484  20.998  51.681  1.00   .00      2SG 
ATOM   4882 HG23 ILE    35      18.432  21.926  50.526  1.00   .00      2SG 
ATOM   4883  CG1 ILE    35      17.149  19.624  49.481  1.00 15.20      2SG 
ATOM   4884 HG11 ILE    35      16.615  18.651  49.515  1.00   .00      2SG 
ATOM   4885 HG12 ILE    35      17.924  19.582  48.686  1.00   .00      2SG 
ATOM   4886  CD  ILE    35      16.137  20.732  49.128  1.00 14.80      2SG 
ATOM   4887  HD1 ILE    35      16.651  21.715  49.074  1.00   .00      2SG 
ATOM   4888  HD2 ILE    35      15.348  20.786  49.909  1.00   .00      2SG 
ATOM   4889  HD3 ILE    35      15.673  20.520  48.141  1.00   .00      2SG 
ATOM   4890  C   ILE    35      19.750  18.229  50.560  1.00 20.10      2SG 
ATOM   4891  O   ILE    35      20.851  18.683  50.919  1.00 20.08      2SG 
ATOM   4892  N   GLU    36      19.590  17.417  49.518  1.00 18.77      2SG 
ATOM   4893  HN  GLU    36      18.698  17.043  49.275  1.00   .00      2SG 
ATOM   4894  CA  GLU    36      20.711  17.014  48.653  1.00 20.40      2SG 
ATOM   4895  HA  GLU    36      21.627  17.297  49.150  1.00   .00      2SG 
ATOM   4896  CB  GLU    36      20.708  15.508  48.377  1.00 28.35      2SG 
ATOM   4897  HB1 GLU    36      21.542  15.300  47.675  1.00   .00      2SG 
ATOM   4898  HB2 GLU    36      19.746  15.266  47.880  1.00   .00      2SG 
ATOM   4899  CG  GLU    36      20.858  14.570  49.540  1.00 36.62      2SG 
ATOM   4900  HG1 GLU    36      20.050  14.761  50.278  1.00   .00      2SG 
ATOM   4901  HG2 GLU    36      21.843  14.736  50.027  1.00   .00      2SG 
ATOM   4902  CD  GLU    36      20.772  13.110  49.066  1.00 44.54      2SG 
ATOM   4903  OE1 GLU    36      19.988  12.331  49.662  1.00 46.07      2SG 
ATOM   4904  OE2 GLU    36      21.484  12.750  48.088  1.00 42.15      2SG 
ATOM   4905  C   GLU    36      20.415  17.666  47.330  1.00 15.89      2SG 
ATOM   4906  O   GLU    36      19.309  17.529  46.832  1.00 17.72      2SG 
ATOM   4907  N   VAL    37      21.370  18.423  46.796  1.00 16.03      2SG 
ATOM   4908  HN  VAL    37      22.245  18.578  47.248  1.00   .00      2SG 
ATOM   4909  CA  VAL    37      21.180  19.074  45.501  1.00 14.21      2SG 
ATOM   4910  HA  VAL    37      20.335  18.604  45.020  1.00   .00      2SG 
ATOM   4911  CB  VAL    37      20.929  20.599  45.639  1.00 16.20      2SG 
ATOM   4912  HB  VAL    37      21.822  21.083  46.088  1.00   .00      2SG 
ATOM   4913  CG1 VAL    37      20.657  21.204  44.269  1.00 15.95      2SG 
ATOM   4914 HG11 VAL    37      19.879  20.614  43.739  1.00   .00      2SG 
ATOM   4915 HG12 VAL    37      21.586  21.194  43.660  1.00   .00      2SG 
ATOM   4916 HG13 VAL    37      20.295  22.248  44.382  1.00   .00      2SG 
ATOM   4917  CG2 VAL    37      19.752  20.837  46.610  1.00 19.14      2SG 
ATOM   4918 HG21 VAL    37      20.055  20.579  47.647  1.00   .00      2SG 
ATOM   4919 HG22 VAL    37      18.890  20.198  46.323  1.00   .00      2SG 
ATOM   4920 HG23 VAL    37      19.451  21.906  46.584  1.00   .00      2SG 
ATOM   4921  C   VAL    37      22.430  18.866  44.660  1.00 14.12      2SG 
ATOM   4922  O   VAL    37      23.577  19.131  45.110  1.00 18.78      2SG 
ATOM   4923  N   ASP    38      22.223  18.327  43.471  1.00 14.22      2SG 
ATOM   4924  HN  ASP    38      21.314  18.062  43.160  1.00   .00      2SG 
ATOM   4925  CA  ASP    38      23.325  18.085  42.532  1.00 16.17      2SG 
ATOM   4926  HA  ASP    38      24.182  18.647  42.872  1.00   .00      2SG 
ATOM   4927  CB  ASP    38      23.661  16.606  42.460  1.00 20.01      2SG 
ATOM   4928  HB1 ASP    38      24.240  16.408  41.533  1.00   .00      2SG 
ATOM   4929  HB2 ASP    38      22.719  16.019  42.434  1.00   .00      2SG 
ATOM   4930  CG  ASP    38      24.473  16.160  43.639  1.00 32.11      2SG 
ATOM   4931  OD1 ASP    38      25.690  16.487  43.672  1.00 34.23      2SG 
ATOM   4932  OD2 ASP    38      23.876  15.518  44.527  1.00 26.98      2SG 
ATOM   4933  C   ASP    38      22.931  18.548  41.151  1.00 17.75      2SG 
ATOM   4934  O   ASP    38      21.792  18.345  40.719  1.00 20.80      2SG 
ATOM   4935  N   LEU    39      23.871  19.180  40.472  1.00 18.78      2SG 
ATOM   4936  HN  LEU    39      24.765  19.387  40.862  1.00   .00      2SG 
ATOM   4937  CA  LEU    39      23.647  19.613  39.099  1.00 15.88      2SG 
ATOM   4938  HA  LEU    39      22.583  19.718  38.949  1.00   .00      2SG 
ATOM   4939  CB  LEU    39      24.353  20.940  38.838  1.00 19.36      2SG 
ATOM   4940  HB1 LEU    39      24.640  20.976  37.766  1.00   .00      2SG 
ATOM   4941  HB2 LEU    39      25.273  20.972  39.459  1.00   .00      2SG 
ATOM   4942  CG  LEU    39      23.511  22.194  39.156  1.00 23.73      2SG 
ATOM   4943  HG  LEU    39      22.799  22.380  38.324  1.00   .00      2SG 
ATOM   4944  CD1 LEU    39      22.742  22.002  40.440  1.00 27.27      2SG 
ATOM   4945 HD11 LEU    39      23.422  21.646  41.243  1.00   .00      2SG 
ATOM   4946 HD12 LEU    39      21.942  21.245  40.292  1.00   .00      2SG 
ATOM   4947 HD13 LEU    39      22.291  22.966  40.758  1.00   .00      2SG 
ATOM   4948  CD2 LEU    39      24.404  23.410  39.201  1.00 21.37      2SG 
ATOM   4949 HD21 LEU    39      24.907  23.551  38.220  1.00   .00      2SG 
ATOM   4950 HD22 LEU    39      25.182  23.279  39.983  1.00   .00      2SG 
ATOM   4951 HD23 LEU    39      23.799  24.315  39.423  1.00   .00      2SG 
ATOM   4952  C   LEU    39      24.266  18.489  38.263  1.00 16.94      2SG 
ATOM   4953  O   LEU    39      25.320  17.957  38.612  1.00 15.67      2SG 
ATOM   4954  N   LEU    40      23.597  18.127  37.177  1.00 16.47      2SG 
ATOM   4955  HN  LEU    40      22.754  18.584  36.903  1.00   .00      2SG 
ATOM   4956  CA  LEU    40      24.043  17.037  36.305  1.00 16.52      2SG 
ATOM   4957  HA  LEU    40      24.975  16.652  36.692  1.00   .00      2SG 
ATOM   4958  CB  LEU    40      22.987  15.947  36.273  1.00 18.57      2SG 
ATOM   4959  HB1 LEU    40      23.441  15.065  35.776  1.00   .00      2SG 
ATOM   4960  HB2 LEU    40      22.148  16.321  35.652  1.00   .00      2SG 
ATOM   4961  CG  LEU    40      22.384  15.459  37.612  1.00 20.89      2SG 
ATOM   4962  HG  LEU    40      21.998  16.332  38.180  1.00   .00      2SG 
ATOM   4963  CD1 LEU    40      21.243  14.472  37.368  1.00 23.68      2SG 
ATOM   4964 HD11 LEU    40      21.616  13.588  36.808  1.00   .00      2SG 
ATOM   4965 HD12 LEU    40      20.443  14.959  36.770  1.00   .00      2SG 
ATOM   4966 HD13 LEU    40      20.827  14.127  38.339  1.00   .00      2SG 
ATOM   4967  CD2 LEU    40      23.460  14.795  38.412  1.00 21.91      2SG 
ATOM   4968 HD21 LEU    40      24.283  15.513  38.616  1.00   .00      2SG 
ATOM   4969 HD22 LEU    40      23.874  13.933  37.847  1.00   .00      2SG 
ATOM   4970 HD23 LEU    40      23.048  14.443  39.382  1.00   .00      2SG 
ATOM   4971  C   LEU    40      24.243  17.523  34.886  1.00 20.13      2SG 
ATOM   4972  O   LEU    40      23.490  18.381  34.406  1.00 20.41      2SG 
ATOM   4973  N   LYS    41      25.235  16.950  34.211  1.00 15.59      2SG 
ATOM   4974  HN  LYS    41      25.822  16.258  34.624  1.00   .00      2SG 
ATOM   4975  CA  LYS    41      25.533  17.295  32.816  1.00 17.68      2SG 
ATOM   4976  HA  LYS    41      24.769  17.978  32.477  1.00   .00      2SG 
ATOM   4977  CB  LYS    41      26.918  17.940  32.663  1.00 20.41      2SG 
ATOM   4978  HB1 LYS    41      27.677  17.266  33.114  1.00   .00      2SG 
ATOM   4979  HB2 LYS    41      26.924  18.906  33.211  1.00   .00      2SG 
ATOM   4980  CG  LYS    41      27.305  18.205  31.181  1.00 16.97      2SG 
ATOM   4981  HG1 LYS    41      26.588  18.929  30.739  1.00   .00      2SG 
ATOM   4982  HG2 LYS    41      27.250  17.252  30.612  1.00   .00      2SG 
ATOM   4983  CD  LYS    41      28.685  18.757  31.081  1.00 22.36      2SG 
ATOM   4984  HD1 LYS    41      29.402  18.024  31.509  1.00   .00      2SG 
ATOM   4985  HD2 LYS    41      28.743  19.700  31.666  1.00   .00      2SG 
ATOM   4986  CE  LYS    41      29.063  19.040  29.646  1.00 22.34      2SG 
ATOM   4987  HE1 LYS    41      28.399  19.817  29.211  1.00   .00      2SG 
ATOM   4988  HE2 LYS    41      29.015  18.112  29.037  1.00   .00      2SG 
ATOM   4989  NZ  LYS    41      30.465  19.547  29.637  1.00 25.31      2SG 
ATOM   4990  HZ1 LYS    41      31.097  18.827  30.042  1.00   .00      2SG 
ATOM   4991  HZ2 LYS    41      30.523  20.417  30.204  1.00   .00      2SG 
ATOM   4992  HZ3 LYS    41      30.753  19.751  28.659  1.00   .00      2SG 
ATOM   4993  C   LYS    41      25.502  15.958  32.115  1.00 20.42      2SG 
ATOM   4994  O   LYS    41      26.326  15.086  32.392  1.00 21.05      2SG 
ATOM   4995  N   ASN    42      24.536  15.790  31.221  1.00 20.09      2SG 
ATOM   4996  HN  ASN    42      23.890  16.512  30.985  1.00   .00      2SG 
ATOM   4997  CA  ASN    42      24.373  14.516  30.531  1.00 27.31      2SG 
ATOM   4998  HA  ASN    42      23.418  14.527  30.027  1.00   .00      2SG 
ATOM   4999  CB  ASN    42      25.503  14.305  29.524  1.00 28.63      2SG 
ATOM   5000  HB1 ASN    42      25.354  13.333  29.008  1.00   .00      2SG 
ATOM   5001  HB2 ASN    42      26.473  14.286  30.064  1.00   .00      2SG 
ATOM   5002  CG  ASN    42      25.549  15.409  28.480  1.00 24.77      2SG 
ATOM   5003  OD1 ASN    42      24.515  15.795  27.930  1.00 27.27      2SG 
ATOM   5004  ND2 ASN    42      26.742  15.923  28.203  1.00 24.22      2SG 
ATOM   5005 HD21 ASN    42      26.827  16.652  27.524  1.00   .00      2SG 
ATOM   5006 HD22 ASN    42      27.555  15.581  28.674  1.00   .00      2SG 
ATOM   5007  C   ASN    42      24.320  13.383  31.565  1.00 27.35      2SG 
ATOM   5008  O   ASN    42      24.916  12.318  31.403  1.00 25.47      2SG 
ATOM   5009  N   GLY    43      23.601  13.634  32.650  1.00 24.27      2SG 
ATOM   5010  HN  GLY    43      23.147  14.507  32.812  1.00   .00      2SG 
ATOM   5011  CA  GLY    43      23.449  12.610  33.670  1.00 26.15      2SG 
ATOM   5012  HA1 GLY    43      23.306  11.679  33.144  1.00   .00      2SG 
ATOM   5013  HA2 GLY    43      22.560  12.867  34.225  1.00   .00      2SG 
ATOM   5014  C   GLY    43      24.566  12.398  34.673  1.00 24.02      2SG 
ATOM   5015  O   GLY    43      24.405  11.589  35.600  1.00 27.92      2SG 
ATOM   5016  N   GLU    44      25.680  13.107  34.528  1.00 23.57      2SG 
ATOM   5017  HN  GLU    44      25.808  13.781  33.805  1.00   .00      2SG 
ATOM   5018  CA  GLU    44      26.799  12.906  35.471  1.00 26.14      2SG 
ATOM   5019  HA  GLU    44      26.576  12.036  36.071  1.00   .00      2SG 
ATOM   5020  CB  GLU    44      28.113  12.709  34.725  1.00 25.02      2SG 
ATOM   5021  HB1 GLU    44      28.877  12.368  35.455  1.00   .00      2SG 
ATOM   5022  HB2 GLU    44      28.425  13.690  34.309  1.00   .00      2SG 
ATOM   5023  CG  GLU    44      28.066  11.702  33.581  1.00 39.12      2SG 
ATOM   5024  HG1 GLU    44      27.183  11.918  32.943  1.00   .00      2SG 
ATOM   5025  HG2 GLU    44      27.970  10.679  34.002  1.00   .00      2SG 
ATOM   5026  CD  GLU    44      29.320  11.755  32.711  1.00 46.92      2SG 
ATOM   5027  OE1 GLU    44      29.328  11.134  31.622  1.00 51.72      2SG 
ATOM   5028  OE2 GLU    44      30.305  12.419  33.113  1.00 51.30      2SG 
ATOM   5029  C   GLU    44      26.918  14.124  36.371  1.00 23.98      2SG 
ATOM   5030  O   GLU    44      26.812  15.265  35.895  1.00 19.18      2SG 
ATOM   5031  N   ARG    45      27.176  13.909  37.659  1.00 20.10      2SG 
ATOM   5032  HN  ARG    45      27.331  13.006  38.051  1.00   .00      2SG 
ATOM   5033  CA  ARG    45      27.236  15.064  38.555  1.00 20.24      2SG 
ATOM   5034  HA  ARG    45      26.370  15.679  38.360  1.00   .00      2SG 
ATOM   5035  CB  ARG    45      27.257  14.629  40.050  1.00 26.35      2SG 
ATOM   5036  HB1 ARG    45      26.645  13.708  40.147  1.00   .00      2SG 
ATOM   5037  HB2 ARG    45      26.788  15.438  40.648  1.00   .00      2SG 
ATOM   5038  CG  ARG    45      28.634  14.343  40.644  1.00 28.46      2SG 
ATOM   5039  HG1 ARG    45      29.259  15.257  40.558  1.00   .00      2SG 
ATOM   5040  HG2 ARG    45      29.112  13.525  40.064  1.00   .00      2SG 
ATOM   5041  CD  ARG    45      28.563  13.923  42.137  1.00 23.79      2SG 
ATOM   5042  HD1 ARG    45      29.560  13.559  42.465  1.00   .00      2SG 
ATOM   5043  HD2 ARG    45      27.805  13.120  42.258  1.00   .00      2SG 
ATOM   5044  NE  ARG    45      28.186  15.013  43.022  1.00 21.53      2SG 
ATOM   5045  HE  ARG    45      27.218  15.134  43.242  1.00   .00      2SG 
ATOM   5046  CZ  ARG    45      29.063  15.855  43.551  1.00 23.79      2SG 
ATOM   5047  NH1 ARG    45      30.371  15.713  43.282  1.00 15.98      2SG 
ATOM   5048 HH11 ARG    45      30.681  14.974  42.684  1.00   .00      2SG 
ATOM   5049 HH12 ARG    45      31.035  16.346  43.679  1.00   .00      2SG 
ATOM   5050  NH2 ARG    45      28.645  16.845  44.321  1.00 26.36      2SG 
ATOM   5051 HH21 ARG    45      27.668  16.958  44.504  1.00   .00      2SG 
ATOM   5052 HH22 ARG    45      29.305  17.481  44.721  1.00   .00      2SG 
ATOM   5053  C   ARG    45      28.412  15.981  38.244  1.00 21.31      2SG 
ATOM   5054  O   ARG    45      29.497  15.554  37.840  1.00 19.03      2SG 
ATOM   5055  N   ILE    46      28.165  17.270  38.409  1.00 15.68      2SG 
ATOM   5056  HN  ILE    46      27.267  17.592  38.697  1.00   .00      2SG 
ATOM   5057  CA  ILE    46      29.153  18.306  38.191  1.00 14.40      2SG 
ATOM   5058  HA  ILE    46      29.865  17.951  37.461  1.00   .00      2SG 
ATOM   5059  CB  ILE    46      28.447  19.577  37.689  1.00 14.30      2SG 
ATOM   5060  HB  ILE    46      27.638  19.852  38.399  1.00   .00      2SG 
ATOM   5061  CG2 ILE    46      29.427  20.729  37.576  1.00 14.85      2SG 
ATOM   5062 HG21 ILE    46      30.327  20.410  37.008  1.00   .00      2SG 
ATOM   5063 HG22 ILE    46      29.744  21.056  38.589  1.00   .00      2SG 
ATOM   5064 HG23 ILE    46      28.952  21.578  37.040  1.00   .00      2SG 
ATOM   5065  CG1 ILE    46      27.780  19.246  36.335  1.00 16.22      2SG 
ATOM   5066 HG11 ILE    46      27.223  18.291  36.439  1.00   .00      2SG 
ATOM   5067 HG12 ILE    46      28.575  19.118  35.570  1.00   .00      2SG 
ATOM   5068  CD  ILE    46      26.806  20.332  35.852  1.00 18.85      2SG 
ATOM   5069  HD1 ILE    46      27.368  21.170  35.387  1.00   .00      2SG 
ATOM   5070  HD2 ILE    46      26.226  20.729  36.712  1.00   .00      2SG 
ATOM   5071  HD3 ILE    46      26.111  19.908  35.096  1.00   .00      2SG 
ATOM   5072  C   ILE    46      29.748  18.543  39.558  1.00 17.65      2SG 
ATOM   5073  O   ILE    46      29.004  18.708  40.540  1.00 20.72      2SG 
ATOM   5074  N   GLU    47      31.073  18.516  39.650  1.00 14.23      2SG 
ATOM   5075  HN  GLU    47      31.669  18.350  38.868  1.00   .00      2SG 
ATOM   5076  CA  GLU    47      31.717  18.735  40.939  1.00 18.51      2SG 
ATOM   5077  HA  GLU    47      31.120  18.251  41.697  1.00   .00      2SG 
ATOM   5078  CB  GLU    47      33.139  18.166  40.939  1.00 19.64      2SG 
ATOM   5079  HB1 GLU    47      33.568  18.301  41.954  1.00   .00      2SG 
ATOM   5080  HB2 GLU    47      33.746  18.744  40.211  1.00   .00      2SG 
ATOM   5081  CG  GLU    47      33.232  16.701  40.576  1.00 27.88      2SG 
ATOM   5082  HG1 GLU    47      32.864  16.556  39.538  1.00   .00      2SG 
ATOM   5083  HG2 GLU    47      32.601  16.109  41.273  1.00   .00      2SG 
ATOM   5084  CD  GLU    47      34.668  16.196  40.664  1.00 31.33      2SG 
ATOM   5085  OE1 GLU    47      34.938  15.101  40.129  1.00 37.88      2SG 
ATOM   5086  OE2 GLU    47      35.515  16.895  41.270  1.00 28.85      2SG 
ATOM   5087  C   GLU    47      31.816  20.203  41.317  1.00 16.30      2SG 
ATOM   5088  O   GLU    47      31.590  20.564  42.470  1.00 19.04      2SG 
ATOM   5089  N   LYS    48      32.179  21.056  40.362  1.00 16.64      2SG 
ATOM   5090  HN  LYS    48      32.334  20.782  39.416  1.00   .00      2SG 
ATOM   5091  CA  LYS    48      32.367  22.465  40.685  1.00 15.89      2SG 
ATOM   5092  HA  LYS    48      32.745  22.531  41.694  1.00   .00      2SG 
ATOM   5093  CB  LYS    48      33.351  23.108  39.703  1.00 23.91      2SG 
ATOM   5094  HB1 LYS    48      32.923  23.043  38.680  1.00   .00      2SG 
ATOM   5095  HB2 LYS    48      34.303  22.537  39.732  1.00   .00      2SG 
ATOM   5096  CG  LYS    48      33.652  24.571  40.011  1.00 33.20      2SG 
ATOM   5097  HG1 LYS    48      33.106  24.859  40.934  1.00   .00      2SG 
ATOM   5098  HG2 LYS    48      33.287  25.194  39.167  1.00   .00      2SG 
ATOM   5099  CD  LYS    48      35.135  24.850  40.216  1.00 45.85      2SG 
ATOM   5100  HD1 LYS    48      35.489  24.276  41.099  1.00   .00      2SG 
ATOM   5101  HD2 LYS    48      35.271  25.934  40.414  1.00   .00      2SG 
ATOM   5102  CE  LYS    48      35.981  24.460  39.004  1.00 50.62      2SG 
ATOM   5103  HE1 LYS    48      35.757  25.139  38.154  1.00   .00      2SG 
ATOM   5104  HE2 LYS    48      35.767  23.408  38.718  1.00   .00      2SG 
ATOM   5105  NZ  LYS    48      37.450  24.566  39.303  1.00 56.58      2SG 
ATOM   5106  HZ1 LYS    48      37.691  23.931  40.091  1.00   .00      2SG 
ATOM   5107  HZ2 LYS    48      37.681  25.546  39.564  1.00   .00      2SG 
ATOM   5108  HZ3 LYS    48      37.996  24.295  38.460  1.00   .00      2SG 
ATOM   5109  C   LYS    48      31.075  23.263  40.746  1.00 18.54      2SG 
ATOM   5110  O   LYS    48      30.766  24.050  39.853  1.00 18.63      2SG 
ATOM   5111  N   VAL    49      30.326  23.039  41.828  1.00 18.21      2SG 
ATOM   5112  HN  VAL    49      30.604  22.397  42.538  1.00   .00      2SG 
ATOM   5113  CA  VAL    49      29.040  23.724  42.047  1.00 16.99      2SG 
ATOM   5114  HA  VAL    49      28.868  24.390  41.214  1.00   .00      2SG 
ATOM   5115  CB  VAL    49      27.893  22.692  42.158  1.00 17.47      2SG 
ATOM   5116  HB  VAL    49      28.116  21.985  42.985  1.00   .00      2SG 
ATOM   5117  CG1 VAL    49      26.532  23.397  42.438  1.00 19.99      2SG 
ATOM   5118 HG11 VAL    49      26.376  24.226  41.715  1.00   .00      2SG 
ATOM   5119 HG12 VAL    49      26.528  23.818  43.466  1.00   .00      2SG 
ATOM   5120 HG13 VAL    49      25.700  22.669  42.329  1.00   .00      2SG 
ATOM   5121  CG2 VAL    49      27.799  21.902  40.863  1.00 17.42      2SG 
ATOM   5122 HG21 VAL    49      28.754  21.368  40.671  1.00   .00      2SG 
ATOM   5123 HG22 VAL    49      27.601  22.590  40.014  1.00   .00      2SG 
ATOM   5124 HG23 VAL    49      26.982  21.153  40.936  1.00   .00      2SG 
ATOM   5125  C   VAL    49      29.162  24.464  43.372  1.00 18.20      2SG 
ATOM   5126  O   VAL    49      29.683  23.913  44.346  1.00 18.69      2SG 
ATOM   5127  N   GLU    50      28.703  25.704  43.400  1.00 14.20      2SG 
ATOM   5128  HN  GLU    50      28.319  26.147  42.594  1.00   .00      2SG 
ATOM   5129  CA  GLU    50      28.733  26.497  44.616  1.00 16.52      2SG 
ATOM   5130  HA  GLU    50      29.303  25.956  45.356  1.00   .00      2SG 
ATOM   5131  CB  GLU    50      29.368  27.855  44.346  1.00 24.76      2SG 
ATOM   5132  HB1 GLU    50      29.242  28.502  45.240  1.00   .00      2SG 
ATOM   5133  HB2 GLU    50      28.857  28.332  43.483  1.00   .00      2SG 
ATOM   5134  CG  GLU    50      30.848  27.714  44.036  1.00 35.25      2SG 
ATOM   5135  HG1 GLU    50      30.972  27.003  43.192  1.00   .00      2SG 
ATOM   5136  HG2 GLU    50      31.366  27.311  44.932  1.00   .00      2SG 
ATOM   5137  CD  GLU    50      31.494  29.012  43.660  1.00 46.29      2SG 
ATOM   5138  OE1 GLU    50      31.214  29.527  42.556  1.00 50.27      2SG 
ATOM   5139  OE2 GLU    50      32.281  29.524  44.478  1.00 52.82      2SG 
ATOM   5140  C   GLU    50      27.308  26.667  45.114  1.00 17.35      2SG 
ATOM   5141  O   GLU    50      26.338  26.419  44.383  1.00 13.12      2SG 
ATOM   5142  N   HSE    51      27.156  27.063  46.363  1.00 13.11      2SG 
ATOM   5143  HN  HSE    51      27.905  27.242  46.996  1.00   .00      2SG 
ATOM   5144  CA  HSE    51      25.782  27.246  46.831  1.00 16.13      2SG 
ATOM   5145  HA  HSE    51      25.178  27.515  45.978  1.00   .00      2SG 
ATOM   5146  CB  HSE    51      25.227  25.980  47.486  1.00 21.37      2SG 
ATOM   5147  HB1 HSE    51      25.268  25.150  46.749  1.00   .00      2SG 
ATOM   5148  HB2 HSE    51      24.169  26.161  47.773  1.00   .00      2SG 
ATOM   5149  ND1 HSE    51      27.118  24.779  48.655  1.00 31.26      2SG 
ATOM   5150  CG  HSE    51      25.979  25.558  48.710  1.00 29.26      2SG 
ATOM   5151  CE1 HSE    51      27.569  24.576  49.880  1.00 34.22      2SG 
ATOM   5152  HE1 HSE    51      28.447  23.999  50.169  1.00   .00      2SG 
ATOM   5153  NE2 HSE    51      26.768  25.199  50.729  1.00 36.69      2SG 
ATOM   5154  HE2 HSE    51      26.863  25.220  51.724  1.00   .00      2SG 
ATOM   5155  CD2 HSE    51      25.766  25.825  50.024  1.00 30.27      2SG 
ATOM   5156  HD2 HSE    51      24.982  26.408  50.490  1.00   .00      2SG 
ATOM   5157  C   HSE    51      25.734  28.395  47.805  1.00 18.85      2SG 
ATOM   5158  O   HSE    51      26.745  28.734  48.437  1.00 16.69      2SG 
ATOM   5159  N   SER    52      24.553  28.987  47.921  1.00 15.83      2SG 
ATOM   5160  HN  SER    52      23.755  28.673  47.413  1.00   .00      2SG 
ATOM   5161  CA  SER    52      24.339  30.144  48.804  1.00 17.57      2SG 
ATOM   5162  HA  SER    52      25.177  30.818  48.700  1.00   .00      2SG 
ATOM   5163  CB  SER    52      23.025  30.833  48.387  1.00 14.47      2SG 
ATOM   5164  HB1 SER    52      23.075  31.138  47.320  1.00   .00      2SG 
ATOM   5165  HB2 SER    52      22.845  31.728  49.020  1.00   .00      2SG 
ATOM   5166  OG  SER    52      21.949  29.906  48.563  1.00 15.32      2SG 
ATOM   5167  HG1 SER    52      21.844  29.799  49.511  1.00   .00      2SG 
ATOM   5168  C   SER    52      24.268  29.711  50.278  1.00 18.73      2SG 
ATOM   5169  O   SER    52      24.222  28.499  50.599  1.00 16.16      2SG 
ATOM   5170  N   ASP    53      24.304  30.690  51.183  1.00 14.15      2SG 
ATOM   5171  HN  ASP    53      24.384  31.652  50.933  1.00   .00      2SG 
ATOM   5172  CA  ASP    53      24.226  30.386  52.613  1.00 15.38      2SG 
ATOM   5173  HA  ASP    53      24.797  29.487  52.795  1.00   .00      2SG 
ATOM   5174  CB  ASP    53      24.783  31.550  53.452  1.00 17.84      2SG 
ATOM   5175  HB1 ASP    53      24.645  31.319  54.530  1.00   .00      2SG 
ATOM   5176  HB2 ASP    53      24.224  32.477  53.203  1.00   .00      2SG 
ATOM   5177  CG  ASP    53      26.273  31.793  53.191  1.00 23.27      2SG 
ATOM   5178  OD1 ASP    53      27.021  30.794  53.180  1.00 29.66      2SG 
ATOM   5179  OD2 ASP    53      26.700  32.956  52.993  1.00 22.71      2SG 
ATOM   5180  C   ASP    53      22.753  30.188  52.939  1.00 15.26      2SG 
ATOM   5181  O   ASP    53      21.924  31.001  52.565  1.00 17.77      2SG 
ATOM   5182  N   LEU    54      22.455  29.112  53.647  1.00 14.08      2SG 
ATOM   5183  HN  LEU    54      23.153  28.480  53.975  1.00   .00      2SG 
ATOM   5184  CA  LEU    54      21.078  28.787  53.990  1.00 15.30      2SG 
ATOM   5185  HA  LEU    54      20.554  28.520  53.084  1.00   .00      2SG 
ATOM   5186  CB  LEU    54      21.070  27.622  54.983  1.00 17.85      2SG 
ATOM   5187  HB1 LEU    54      21.614  27.936  55.898  1.00   .00      2SG 
ATOM   5188  HB2 LEU    54      21.604  26.764  54.523  1.00   .00      2SG 
ATOM   5189  CG  LEU    54      19.661  27.158  55.389  1.00 19.80      2SG 
ATOM   5190  HG  LEU    54      19.048  28.034  55.690  1.00   .00      2SG 
ATOM   5191  CD1 LEU    54      19.013  26.457  54.191  1.00 18.21      2SG 
ATOM   5192 HD11 LEU    54      19.705  25.694  53.775  1.00   .00      2SG 
ATOM   5193 HD12 LEU    54      18.785  27.199  53.397  1.00   .00      2SG 
ATOM   5194 HD13 LEU    54      18.077  25.951  54.510  1.00   .00      2SG
[truncated: 59,015 more chars]
